# Supplementary material for: Global, regional, and national burden of early-onset kidney cancer in adolescents and young adults aged 15-39 years from 1990 to 2021: a systematic analysis for the Global Burden of Disease Study 2021
Source: Research Square preprint supplement (doi:10.21203/rs.3.rs-7464519/v1), 2025-10-17
Supplement: Supplementary file 1 [file 0057882d94058bb083225a2b.xlsx]

## Sheet: Table S3
Table S3. Annual socio-demographic index (SDI) values for each country from 1990 to 2021.
Location	Year	Mean value	Lower value	Upper value
Global	1950	0.369234922984689	0.369234922984689	0.369234922984689
Southeast Asia, East Asia, and Oceania	1950	0.205729404413321	0.205729404413321	0.205729404413321
East Asia	1950	0.193972363901504	0.193972363901504	0.193972363901504
China	1950	0.18414354727536	0.18414354727536	0.18414354727536
Democratic People's Republic of Korea	1950	0.323069256044438	0.323069256044438	0.323069256044438
Taiwan (Province of China)	1950	0.295925327261469	0.295925327261469	0.295925327261469
Southeast Asia	1950	0.224047996872681	0.224047996872681	0.224047996872681
Cambodia	1950	0.188150847317638	0.188150847317638	0.188150847317638
Indonesia	1950	0.197775374015412	0.197775374015412	0.197775374015412
Lao People's Democratic Republic	1950	0.13623078846608	0.13623078846608	0.13623078846608
Malaysia	1950	0.214102682171804	0.214102682171804	0.214102682171804
Maldives	1950	0.196661027056061	0.196661027056061	0.196661027056061
Myanmar	1950	0.137807234209728	0.137807234209728	0.137807234209728
Philippines	1950	0.336157457146868	0.336157457146868	0.336157457146868
Sri Lanka	1950	0.328662531232582	0.328662531232582	0.328662531232582
Thailand	1950	0.235012244509159	0.235012244509159	0.235012244509159
Timor-Leste	1950	0.103452588961132	0.103452588961132	0.103452588961132
Viet Nam	1950	0.208889387784129	0.208889387784129	0.208889387784129
Oceania	1950	0.220001956211152	0.220001956211152	0.220001956211152
Fiji	1950	0.298635685169495	0.298635685169495	0.298635685169495
Kiribati	1950	0.276751222668937	0.276751222668937	0.276751222668937
Marshall Islands	1950	0.237158263195999	0.237158263195999	0.237158263195999
Micronesia (Federated States of)	1950	0.235773343929127	0.235773343929127	0.235773343929127
Papua New Guinea	1950	0.138627687826563	0.138627687826563	0.138627687826563
Samoa	1950	0.2843665161182	0.2843665161182	0.2843665161182
Solomon Islands	1950	0.16891169937139	0.16891169937139	0.16891169937139
Tonga	1950	0.266900015116123	0.266900015116123	0.266900015116123
Vanuatu	1950	0.196423511288867	0.196423511288867	0.196423511288867
Central Europe, Eastern Europe, and Central Asia	1950	0.525915472179222	0.525915472179222	0.525915472179222
Central Asia	1950	0.432762554843459	0.432762554843459	0.432762554843459
Armenia	1950	0.453517664467803	0.453517664467803	0.453517664467803
Azerbaijan	1950	0.412950444925591	0.412950444925591	0.412950444925591
Georgia	1950	0.552054832873885	0.552054832873885	0.552054832873885
Kazakhstan	1950	0.447574250895111	0.447574250895111	0.447574250895111
Kyrgyzstan	1950	0.438539857937692	0.438539857937692	0.438539857937692
Mongolia	1950	0.305923411187174	0.305923411187174	0.305923411187174
Tajikistan	1950	0.314889706341097	0.314889706341097	0.314889706341097
Turkmenistan	1950	0.425192723830822	0.425192723830822	0.425192723830822
Uzbekistan	1950	0.371074328119507	0.371074328119507	0.371074328119507
Central Europe	1950	0.482313114261625	0.482313114261625	0.482313114261625
Albania	1950	0.349281636848325	0.349281636848325	0.349281636848325
Bosnia and Herzegovina	1950	0.293421743991885	0.293421743991885	0.293421743991885
Bulgaria	1950	0.462106504707137	0.462106504707137	0.462106504707137
Croatia	1950	0.471246318684977	0.471246318684977	0.471246318684977
Czechia	1950	0.57297921817731	0.57297921817731	0.57297921817731
Hungary	1950	0.502327290542277	0.502327290542277	0.502327290542277
North Macedonia	1950	0.412207487654728	0.412207487654728	0.412207487654728
Montenegro	1950	0.457012179670919	0.457012179670919	0.457012179670919
Poland	1950	0.494196525065438	0.494196525065438	0.494196525065438
Romania	1950	0.401225454196331	0.401225454196331	0.401225454196331
Serbia	1950	0.477356739651533	0.477356739651533	0.477356739651533
Slovakia	1950	0.523674882312421	0.523674882312421	0.523674882312421
Slovenia	1950	0.559861422936628	0.559861422936628	0.559861422936628
Eastern Europe	1950	0.554107567645955	0.554107567645955	0.554107567645955
Belarus	1950	0.480655582911316	0.480655582911316	0.480655582911316
Estonia	1950	0.559352964985998	0.559352964985998	0.559352964985998
Latvia	1950	0.568873080432231	0.568873080432231	0.568873080432231
Lithuania	1950	0.502805694532699	0.502805694532699	0.502805694532699
Republic of Moldova	1950	0.459020824605532	0.459020824605532	0.459020824605532
Russian Federation	1950	0.560026855957586	0.560026855957586	0.560026855957586
Ukraine	1950	0.549439707592601	0.549439707592601	0.549439707592601
High-income	1950	0.584939692324379	0.584939692324379	0.584939692324379
High-income Asia Pacific	1950	0.505851629754301	0.505851629754301	0.505851629754301
Brunei Darussalam	1950	0.379203403336104	0.379203403336104	0.379203403336104
Japan	1950	0.543099876338514	0.543099876338514	0.543099876338514
Republic of Korea	1950	0.303972463717136	0.303972463717136	0.303972463717136
Singapore	1950	0.318369437049637	0.318369437049637	0.318369437049637
Australasia	1950	0.570681353040179	0.570681353040179	0.570681353040179
Australia	1950	0.560717179365627	0.560717179365627	0.560717179365627
New Zealand	1950	0.603510388743769	0.603510388743769	0.603510388743769
Western Europe	1950	0.582396000476785	0.582396000476785	0.582396000476785
Andorra	1950	0.608750024096457	0.608750024096457	0.608750024096457
Austria	1950	0.600576810509672	0.600576810509672	0.600576810509672
Belgium	1950	0.573464435210292	0.573464435210292	0.573464435210292
Cyprus	1950	0.451021417429108	0.451021417429108	0.451021417429108
Denmark	1950	0.634151319828077	0.634151319828077	0.634151319828077
Finland	1950	0.565768936078404	0.565768936078404	0.565768936078404
France	1950	0.540784786297931	0.540784786297931	0.540784786297931
Germany	1950	0.640368556817943	0.640368556817943	0.640368556817943
Greece	1950	0.508330955615876	0.508330955615876	0.508330955615876
Iceland	1950	0.563962495103174	0.563962495103174	0.563962495103174
Ireland	1950	0.578381661620837	0.578381661620837	0.578381661620837
Israel	1950	0.508746838698366	0.508746838698366	0.508746838698366
Italy	1950	0.525606918426519	0.525606918426519	0.525606918426519
Luxembourg	1950	0.643187413332276	0.643187413332276	0.643187413332276
Malta	1950	0.41445941287374	0.41445941287374	0.41445941287374
Netherlands	1950	0.650974337023232	0.650974337023232	0.650974337023232
Norway	1950	0.655818211437563	0.655818211437563	0.655818211437563
Portugal	1950	0.421596118155604	0.421596118155604	0.421596118155604
Spain	1950	0.440265751337101	0.440265751337101	0.440265751337101
Sweden	1950	0.64120830465897	0.64120830465897	0.64120830465897
Switzerland	1950	0.748828775231629	0.748828775231629	0.748828775231629
United Kingdom	1950	0.588086039863192	0.588086039863192	0.588086039863192
Southern Latin America	1950	0.470229438649993	0.470229438649993	0.470229438649993
Argentina	1950	0.479474011292281	0.479474011292281	0.479474011292281
Chile	1950	0.438382509058389	0.438382509058389	0.438382509058389
Uruguay	1950	0.477361516516207	0.477361516516207	0.477361516516207
High-income North America	1950	0.615405804612241	0.615405804612241	0.615405804612241
Canada	1950	0.621815371083844	0.621815371083844	0.621815371083844
United States of America	1950	0.614249877090532	0.614249877090532	0.614249877090532
Latin America and Caribbean	1950	0.27806955451172	0.27806955451172	0.27806955451172
Caribbean	1950	0.323185331243843	0.323185331243843	0.323185331243843
Antigua and Barbuda	1950	0.331150382441539	0.331150382441539	0.331150382441539
Bahamas	1950	0.478685879742675	0.478685879742675	0.478685879742675
Barbados	1950	0.414855871335792	0.414855871335792	0.414855871335792
Belize	1950	0.284624064403359	0.284624064403359	0.284624064403359
Cuba	1950	0.375371138171392	0.375371138171392	0.375371138171392
Dominica	1950	0.379561382353057	0.379561382353057	0.379561382353057
Dominican Republic	1950	0.161988768087531	0.161988768087531	0.161988768087531
Grenada	1950	0.230028379492217	0.230028379492217	0.230028379492217
Guyana	1950	0.290248945497835	0.290248945497835	0.290248945497835
Haiti	1950	0.185039023187011	0.185039023187011	0.185039023187011
Jamaica	1950	0.359081003874577	0.359081003874577	0.359081003874577
Saint Lucia	1950	0.279792997733841	0.279792997733841	0.279792997733841
Saint Vincent and the Grenadines	1950	0.2552033573715	0.2552033573715	0.2552033573715
Suriname	1950	0.279715461786653	0.279715461786653	0.279715461786653
Trinidad and Tobago	1950	0.393243185754755	0.393243185754755	0.393243185754755
Andean Latin America	1950	0.289483417576641	0.289483417576641	0.289483417576641
Bolivia (Plurinational State of)	1950	0.247141414523873	0.247141414523873	0.247141414523873
Ecuador	1950	0.321070492979907	0.321070492979907	0.321070492979907
Peru	1950	0.289569533453603	0.289569533453603	0.289569533453603
Central Latin America	1950	0.27862130129878	0.27862130129878	0.27862130129878
Colombia	1950	0.272653815764185	0.272653815764185	0.272653815764185
Costa Rica	1950	0.311276237357257	0.311276237357257	0.311276237357257
El Salvador	1950	0.191343921444416	0.191343921444416	0.191343921444416
Guatemala	1950	0.203053031226908	0.203053031226908	0.203053031226908
Honduras	1950	0.182498395899476	0.182498395899476	0.182498395899476
Mexico	1950	0.286811929850591	0.286811929850591	0.286811929850591
Nicaragua	1950	0.211971969605614	0.211971969605614	0.211971969605614
Panama	1950	0.340534201091578	0.340534201091578	0.340534201091578
Venezuela (Bolivarian Republic of)	1950	0.322694559053598	0.322694559053598	0.322694559053598
Tropical Latin America	1950	0.253906836071661	0.253906836071661	0.253906836071661
Brazil	1950	0.25289898944145	0.25289898944145	0.25289898944145
Paraguay	1950	0.292716473148141	0.292716473148141	0.292716473148141
North Africa and Middle East	1950	0.191330356106761	0.191330356106761	0.191330356106761
North Africa and Middle East	1950	0.191330356106761	0.191330356106761	0.191330356106761
Algeria	1950	0.141578712758397	0.141578712758397	0.141578712758397
Bahrain	1950	0.231539110268371	0.231539110268371	0.231539110268371
Egypt	1950	0.227207604115682	0.227207604115682	0.227207604115682
Iran (Islamic Republic of)	1950	0.168392912748158	0.168392912748158	0.168392912748158
Iraq	1950	0.158703809617749	0.158703809617749	0.158703809617749
Jordan	1950	0.115944181885907	0.115944181885907	0.115944181885907
Kuwait	1950	0.319760648172311	0.319760648172311	0.319760648172311
Lebanon	1950	0.272311276574886	0.272311276574886	0.272311276574886
Libya	1950	0.152541634405446	0.152541634405446	0.152541634405446
Morocco	1950	0.0989413383172724	0.0989413383172724	0.0989413383172724
Palestine	1950	0.142587436427002	0.142587436427002	0.142587436427002
Oman	1950	0.13031668225623	0.13031668225623	0.13031668225623
Qatar	1950	0.261957144121507	0.261957144121507	0.261957144121507
Saudi Arabia	1950	0.205572638663192	0.205572638663192	0.205572638663192
Syrian Arab Republic	1950	0.156562742363787	0.156562742363787	0.156562742363787
Tunisia	1950	0.152530529558645	0.152530529558645	0.152530529558645
Türkiye	1950	0.239594884214533	0.239594884214533	0.239594884214533
United Arab Emirates	1950	0.195075326181509	0.195075326181509	0.195075326181509
Yemen	1950	0.0850840641126786	0.0850840641126786	0.0850840641126786
South Asia	1950	0.182001764426872	0.182001764426872	0.182001764426872
South Asia	1950	0.182001764426872	0.182001764426872	0.182001764426872
Afghanistan	1950	0.11320959051682	0.11320959051682	0.11320959051682
Bangladesh	1950	0.103047762986529	0.103047762986529	0.103047762986529
Bhutan	1950	0.0530209398747532	0.0530209398747532	0.0530209398747532
India	1950	0.189821934460978	0.189821934460978	0.189821934460978
Nepal	1950	0.0992064101918465	0.0992064101918465	0.0992064101918465
Pakistan	1950	0.153404270314979	0.153404270314979	0.153404270314979
Sub-Saharan Africa	1950	0.157558732780065	0.157558732780065	0.157558732780065
Central Sub-Saharan Africa	1950	0.154393232096912	0.154393232096912	0.154393232096912
Angola	1950	0.134403694359261	0.134403694359261	0.134403694359261
Central African Republic	1950	0.106869990305278	0.106869990305278	0.106869990305278
Congo	1950	0.16724507764079	0.16724507764079	0.16724507764079
Democratic Republic of the Congo	1950	0.150145905228185	0.150145905228185	0.150145905228185
Equatorial Guinea	1950	0.106073840291638	0.106073840291638	0.106073840291638
Gabon	1950	0.165303001222814	0.165303001222814	0.165303001222814
Eastern Sub-Saharan Africa	1950	0.118171038601277	0.118171038601277	0.118171038601277
Burundi	1950	0.100491601297851	0.100491601297851	0.100491601297851
Comoros	1950	0.121469026326053	0.121469026326053	0.121469026326053
Djibouti	1950	0.163063165280982	0.163063165280982	0.163063165280982
Eritrea	1950	0.0692178365096827	0.0692178365096827	0.0692178365096827
Ethiopia	1950	0.0560665249479014	0.0560665249479014	0.0560665249479014
Kenya	1950	0.125031917174226	0.125031917174226	0.125031917174226
Madagascar	1950	0.137958583256569	0.137958583256569	0.137958583256569
Malawi	1950	0.138477629759933	0.138477629759933	0.138477629759933
Mauritius	1950	0.292283122980255	0.292283122980255	0.292283122980255
Mozambique	1950	0.0927374259711411	0.0927374259711411	0.0927374259711411
Rwanda	1950	0.12575240643545	0.12575240643545	0.12575240643545
Seychelles	1950	0.371025606260478	0.371025606260478	0.371025606260478
Somalia	1950	0.060459262180856	0.060459262180856	0.060459262180856
United Republic of Tanzania	1950	0.104125026309257	0.104125026309257	0.104125026309257
Uganda	1950	0.100429345963882	0.100429345963882	0.100429345963882
Zambia	1950	0.140486779541041	0.140486779541041	0.140486779541041
Southern Sub-Saharan Africa	1950	0.294116446363601	0.294116446363601	0.294116446363601
Botswana	1950	0.135694371058191	0.135694371058191	0.135694371058191
Lesotho	1950	0.158056569656762	0.158056569656762	0.158056569656762
Namibia	1950	0.215669267564526	0.215669267564526	0.215669267564526
South Africa	1950	0.32413851968928	0.32413851968928	0.32413851968928
Eswatini	1950	0.142694292912592	0.142694292912592	0.142694292912592
Zimbabwe	1950	0.182130350506324	0.182130350506324	0.182130350506324
Western Sub-Saharan Africa	1950	0.139948263275894	0.139948263275894	0.139948263275894
Benin	1950	0.107444053570549	0.107444053570549	0.107444053570549
Burkina Faso	1950	0.0566407677732457	0.0566407677732457	0.0566407677732457
Cameroon	1950	0.136048225110514	0.136048225110514	0.136048225110514
Cabo Verde	1950	0.135264	0.135264	0.135264
Chad	1950	0.0574139463693357	0.0574139463693357	0.0574139463693357
C?te d'Ivoire	1950	0.117305699102575	0.117305699102575	0.117305699102575
Gambia	1950	0.119641808102507	0.119641808102507	0.119641808102507
Ghana	1950	0.244808111833915	0.244808111833915	0.244808111833915
Guinea	1950	0.0588431349631604	0.0588431349631604	0.0588431349631604
Guinea-Bissau	1950	0.0650857570416604	0.0650857570416604	0.0650857570416604
Liberia	1950	0.14199314440556	0.14199314440556	0.14199314440556
Mali	1950	0.0589743056925331	0.0589743056925331	0.0589743056925331
Mauritania	1950	0.179851331267817	0.179851331267817	0.179851331267817
Niger	1950	0.046479795394147	0.046479795394147	0.046479795394147
Nigeria	1950	0.151738724674113	0.151738724674113	0.151738724674113
Sao Tome and Principe	1950	0.176227803787723	0.176227803787723	0.176227803787723
Senegal	1950	0.104813737179381	0.104813737179381	0.104813737179381
Sierra Leone	1950	0.115354819108611	0.115354819108611	0.115354819108611
Togo	1950	0.103851200025577	0.103851200025577	0.103851200025577
American Samoa	1950	0.484893960163775	0.484893960163775	0.484893960163775
Bermuda	1950	0.423249931186238	0.423249931186238	0.423249931186238
Cook Islands	1950	0.337651273963242	0.337651273963242	0.337651273963242
Greenland	1950	0.564999971166561	0.564999971166561	0.564999971166561
Guam	1950	0.565701049518185	0.565701049518185	0.565701049518185
Monaco	1950	0.688311979409682	0.688311979409682	0.688311979409682
Nauru	1950	0.401252441296697	0.401252441296697	0.401252441296697
Niue	1950	0.339378971795965	0.339378971795965	0.339378971795965
Northern Mariana Islands	1950	0.446763717870801	0.446763717870801	0.446763717870801
Palau	1950	0.421918527142582	0.421918527142582	0.421918527142582
Puerto Rico	1950	0.397437102723081	0.397437102723081	0.397437102723081
Saint Kitts and Nevis	1950	0.337799345963223	0.337799345963223	0.337799345963223
San Marino	1950	0.643648816728399	0.643648816728399	0.643648816728399
Tokelau	1950	0.295961347195921	0.295961347195921	0.295961347195921
Tuvalu	1950	0.264210883411609	0.264210883411609	0.264210883411609
United States Virgin Islands	1950	0.443557824280789	0.443557824280789	0.443557824280789
Northern Ireland	1950	0.488105780612805	0.488105780612805	0.488105780612805
Scotland	1950	0.578740331416463	0.578740331416463	0.578740331416463
South Sudan	1950	0.130256689615166	0.130256689615166	0.130256689615166
Eastern Cape	1950	0.270349948542099	0.270349948542099	0.270349948542099
Free State	1950	0.308342486994132	0.308342486994132	0.308342486994132
Gauteng	1950	0.44598390265817	0.44598390265817	0.44598390265817
KwaZulu-Natal	1950	0.276265737303176	0.276265737303176	0.276265737303176
Limpopo	1950	0.195386002224526	0.195386002224526	0.195386002224526
Mpumalanga	1950	0.216849868561007	0.216849868561007	0.216849868561007
North-West	1950	0.270386894537624	0.270386894537624	0.270386894537624
Northern Cape	1950	0.324812676411504	0.324812676411504	0.324812676411504
Western Cape	1950	0.461318617069829	0.461318617069829	0.461318617069829
Sudan	1950	0.132435328425833	0.132435328425833	0.132435328425833
Alabama	1950	0.549755387415879	0.549755387415879	0.549755387415879
Alaska	1950	0.593678793899123	0.593678793899123	0.593678793899123
Arizona	1950	0.605681653078559	0.605681653078559	0.605681653078559
Arkansas	1950	0.544457086899491	0.544457086899491	0.544457086899491
California	1950	0.64971529112562	0.64971529112562	0.64971529112562
Colorado	1950	0.639437377570671	0.639437377570671	0.639437377570671
Connecticut	1950	0.660094522844163	0.660094522844163	0.660094522844163
Delaware	1950	0.632275645485319	0.632275645485319	0.632275645485319
District of Columbia	1950	0.654295418682989	0.654295418682989	0.654295418682989
Florida	1950	0.611519145591631	0.611519145591631	0.611519145591631
Georgia	1950	0.547056828629059	0.547056828629059	0.547056828629059
Hawaii	1950	0.612824816735066	0.612824816735066	0.612824816735066
Idaho	1950	0.597581350133498	0.597581350133498	0.597581350133498
Illinois	1950	0.629819400259866	0.629819400259866	0.629819400259866
Indiana	1950	0.607746975133601	0.607746975133601	0.607746975133601
Iowa	1950	0.626567895329337	0.626567895329337	0.626567895329337
Kansas	1950	0.626431842447421	0.626431842447421	0.626431842447421
Kentucky	1950	0.550919711272276	0.550919711272276	0.550919711272276
Louisiana	1950	0.54605384851406	0.54605384851406	0.54605384851406
Maine	1950	0.594069133399777	0.594069133399777	0.594069133399777
Maryland	1950	0.632834865345404	0.632834865345404	0.632834865345404
Massachusetts	1950	0.666920467588734	0.666920467588734	0.666920467588734
Michigan	1950	0.619993769568362	0.619993769568362	0.619993769568362
Minnesota	1950	0.634288676883735	0.634288676883735	0.634288676883735
Mississippi	1950	0.518344268489876	0.518344268489876	0.518344268489876
Missouri	1950	0.603936585363183	0.603936585363183	0.603936585363183
Montana	1950	0.626518583812085	0.626518583812085	0.626518583812085
Nebraska	1950	0.632597032202136	0.632597032202136	0.632597032202136
Nevada	1950	0.615722422242114	0.615722422242114	0.615722422242114
New Hampshire	1950	0.619030040371141	0.619030040371141	0.619030040371141
New Jersey	1950	0.65134829565242	0.65134829565242	0.65134829565242
New Mexico	1950	0.576692638067278	0.576692638067278	0.576692638067278
New York	1950	0.647868805949025	0.647868805949025	0.647868805949025
North Carolina	1950	0.563646789298975	0.563646789298975	0.563646789298975
North Dakota	1950	0.593734307055995	0.593734307055995	0.593734307055995
Ohio	1950	0.615542860173431	0.615542860173431	0.615542860173431
Oklahoma	1950	0.585931138295483	0.585931138295483	0.585931138295483
Oregon	1950	0.641781303315623	0.641781303315623	0.641781303315623
Pennsylvania	1950	0.62957749567449	0.62957749567449	0.62957749567449
Rhode Island	1950	0.62377708344054	0.62377708344054	0.62377708344054
South Carolina	1950	0.547597248944298	0.547597248944298	0.547597248944298
South Dakota	1950	0.602771205028148	0.602771205028148	0.602771205028148
Tennessee	1950	0.557305921624275	0.557305921624275	0.557305921624275
Texas	1950	0.577971659736947	0.577971659736947	0.577971659736947
Utah	1950	0.627797881253853	0.627797881253853	0.627797881253853
Vermont	1950	0.610148977904572	0.610148977904572	0.610148977904572
Virginia	1950	0.603507464783463	0.603507464783463	0.603507464783463
Washington	1950	0.643667478488492	0.643667478488492	0.643667478488492
West Virginia	1950	0.569026094192251	0.569026094192251	0.569026094192251
Wisconsin	1950	0.629425136304615	0.629425136304615	0.629425136304615
Wyoming	1950	0.613429941254114	0.613429941254114	0.613429941254114
North East England	1950	0.546116002838459	0.546116002838459	0.546116002838459
North West England	1950	0.570415394653181	0.570415394653181	0.570415394653181
Yorkshire and the Humber	1950	0.553470971693927	0.553470971693927	0.553470971693927
East Midlands	1950	0.554358889025956	0.554358889025956	0.554358889025956
West Midlands	1950	0.549988216122091	0.549988216122091	0.549988216122091
East of England	1950	0.582422004967896	0.582422004967896	0.582422004967896
Greater London	1950	0.621722468409516	0.621722468409516	0.621722468409516
South East England	1950	0.637105013925029	0.637105013925029	0.637105013925029
South West England	1950	0.606946780902708	0.606946780902708	0.606946780902708
Wales	1950	0.561013743337429	0.561013743337429	0.561013743337429
Aguascalientes	1950	0.278383394871573	0.278383394871573	0.278383394871573
Baja California	1950	0.337416327580677	0.337416327580677	0.337416327580677
Baja California Sur	1950	0.309167577819222	0.309167577819222	0.309167577819222
Campeche	1950	0.280702116932715	0.280702116932715	0.280702116932715
Coahuila	1950	0.30335989605203	0.30335989605203	0.30335989605203
Colima	1950	0.267101417502307	0.267101417502307	0.267101417502307
Chiapas	1950	0.234506942910621	0.234506942910621	0.234506942910621
Chihuahua	1950	0.30111936947183	0.30111936947183	0.30111936947183
Mexico City	1950	0.400009653385267	0.400009653385267	0.400009653385267
Durango	1950	0.257687218764907	0.257687218764907	0.257687218764907
Guanajuato	1950	0.232545993087438	0.232545993087438	0.232545993087438
Guerrero	1950	0.213574616774835	0.213574616774835	0.213574616774835
Hidalgo	1950	0.235084521261266	0.235084521261266	0.235084521261266
Jalisco	1950	0.291170148956352	0.291170148956352	0.291170148956352
México	1950	0.281023021215244	0.281023021215244	0.281023021215244
Michoacán de Ocampo	1950	0.234940959727814	0.234940959727814	0.234940959727814
Morelos	1950	0.286792184531138	0.286792184531138	0.286792184531138
Nayarit	1950	0.239800890474862	0.239800890474862	0.239800890474862
Nuevo León	1950	0.321979684741797	0.321979684741797	0.321979684741797
Oaxaca	1950	0.231704549713217	0.231704549713217	0.231704549713217
Puebla	1950	0.253349701980804	0.253349701980804	0.253349701980804
Querétaro	1950	0.257773015910459	0.257773015910459	0.257773015910459
Quintana Roo	1950	0.255445353901432	0.255445353901432	0.255445353901432
San Luis Potosí	1950	0.248630425398542	0.248630425398542	0.248630425398542
Sinaloa	1950	0.265682029920009	0.265682029920009	0.265682029920009
Sonora	1950	0.310868942338574	0.310868942338574	0.310868942338574
Tabasco	1950	0.239582400023234	0.239582400023234	0.239582400023234
Tamaulipas	1950	0.305630067736997	0.305630067736997	0.305630067736997
Tlaxcala	1950	0.234268681179994	0.234268681179994	0.234268681179994
Veracruz de Ignacio de la Llave	1950	0.269606116510579	0.269606116510579	0.269606116510579
Yucatán	1950	0.295988290586693	0.295988290586693	0.295988290586693
Zacatecas	1950	0.239760424550499	0.239760424550499	0.239760424550499
Aceh	1950	0.221005105773604	0.221005105773604	0.221005105773604
North Sumatra	1950	0.211737126205415	0.211737126205415	0.211737126205415
West Sumatra	1950	0.206245267854804	0.206245267854804	0.206245267854804
Riau	1950	0.238538586438812	0.238538586438812	0.238538586438812
Jambi	1950	0.175120682996233	0.175120682996233	0.175120682996233
South Sumatra	1950	0.208422091199923	0.208422091199923	0.208422091199923
Bengkulu	1950	0.16086989577545	0.16086989577545	0.16086989577545
Lampung	1950	0.158054957904469	0.158054957904469	0.158054957904469
Bangka-Belitung Islands	1950	0.230148138010523	0.230148138010523	0.230148138010523
Riau Islands	1950	0.311419590696168	0.311419590696168	0.311419590696168
North Kalimantan	1950	0.324212951349854	0.324212951349854	0.324212951349854
Jakarta	1950	0.305996381431376	0.305996381431376	0.305996381431376
West Java	1950	0.197230241298525	0.197230241298525	0.197230241298525
Central Java	1950	0.178760695585525	0.178760695585525	0.178760695585525
Yogyakarta	1950	0.174459668262482	0.174459668262482	0.174459668262482
East Java	1950	0.186144193736025	0.186144193736025	0.186144193736025
Banten	1950	0.222974533279422	0.222974533279422	0.222974533279422
Bali	1950	0.176582688494757	0.176582688494757	0.176582688494757
West Nusa Tenggara	1950	0.115878841269957	0.115878841269957	0.115878841269957
East Nusa Tenggara	1950	0.142290199660733	0.142290199660733	0.142290199660733
West Kalimantan	1950	0.149746973147405	0.149746973147405	0.149746973147405
Central Kalimantan	1950	0.214929455341542	0.214929455341542	0.214929455341542
South Kalimantan	1950	0.181576970208773	0.181576970208773	0.181576970208773
East Kalimantan	1950	0.24534492505272	0.24534492505272	0.24534492505272
North Sulawesi	1950	0.208269930028308	0.208269930028308	0.208269930028308
Central Sulawesi	1950	0.165641134878292	0.165641134878292	0.165641134878292
South Sulawesi	1950	0.157348392352657	0.157348392352657	0.157348392352657
Southeast Sulawesi	1950	0.132526105525739	0.132526105525739	0.132526105525739
Gorontalo	1950	0.171259380268761	0.171259380268761	0.171259380268761
West Sulawesi	1950	0.181466231527681	0.181466231527681	0.181466231527681
Maluku	1950	0.238091823178173	0.238091823178173	0.238091823178173
North Maluku	1950	0.159962713594972	0.159962713594972	0.159962713594972
West Papua	1950	0.249346603288862	0.249346603288862	0.249346603288862
Papua	1950	0.252098870662019	0.252098870662019	0.252098870662019
England	1950	0.590307918519153	0.590307918519153	0.590307918519153
Acre	1950	0.152603937787108	0.152603937787108	0.152603937787108
Alagoas	1950	0.15437043661816	0.15437043661816	0.15437043661816
Amazonas	1950	0.211220104318023	0.211220104318023	0.211220104318023
Amapá	1950	0.210007770343601	0.210007770343601	0.210007770343601
Bahia	1950	0.174727352300881	0.174727352300881	0.174727352300881
Ceará	1950	0.175741015189825	0.175741015189825	0.175741015189825
Distrito Federal	1950	0.345173226209532	0.345173226209532	0.345173226209532
Espírito Santo	1950	0.219409296640794	0.219409296640794	0.219409296640794
Goiás	1950	0.170459074896113	0.170459074896113	0.170459074896113
Maranh?o	1950	0.13656910209025	0.13656910209025	0.13656910209025
Minas Gerais	1950	0.234501653353648	0.234501653353648	0.234501653353648
Mato Grosso do Sul	1950	0.231146311508324	0.231146311508324	0.231146311508324
Mato Grosso	1950	0.24210173440501	0.24210173440501	0.24210173440501
Pará	1950	0.202682746845109	0.202682746845109	0.202682746845109
Paraíba	1950	0.177268025403288	0.177268025403288	0.177268025403288
Paraná	1950	0.248624645722077	0.248624645722077	0.248624645722077
Pernambuco	1950	0.183310705268162	0.183310705268162	0.183310705268162
Piaui	1950	0.133518358635409	0.133518358635409	0.133518358635409
Rio de Janeiro	1950	0.348857747930377	0.348857747930377	0.348857747930377
Rio Grande do Norte	1950	0.180049175203761	0.180049175203761	0.180049175203761
Rond?nia	1950	0.213960040381735	0.213960040381735	0.213960040381735
Roraima	1950	0.234817353102101	0.234817353102101	0.234817353102101
Rio Grande do Sul	1950	0.303732434639141	0.303732434639141	0.303732434639141
Santa Catarina	1950	0.273699275746716	0.273699275746716	0.273699275746716
Sergipe	1950	0.181654679581564	0.181654679581564	0.181654679581564
S?o Paulo	1950	0.325975986782395	0.325975986782395	0.325975986782395
Tocantins	1950	0.157010617901531	0.157010617901531	0.157010617901531
Andhra Pradesh	1950	0.174487712915122	0.174487712915122	0.174487712915122
Arunachal Pradesh	1950	0.137097521218356	0.137097521218356	0.137097521218356
Assam	1950	0.171534404171011	0.171534404171011	0.171534404171011
Bihar	1950	0.156873996268938	0.156873996268938	0.156873996268938
Chhattisgarh	1950	0.146375508530817	0.146375508530817	0.146375508530817
Delhi	1950	0.333492143307391	0.333492143307391	0.333492143307391
Goa	1950	0.302764704583774	0.302764704583774	0.302764704583774
Gujarat	1950	0.205820123420598	0.205820123420598	0.205820123420598
Haryana	1950	0.185776721579962	0.185776721579962	0.185776721579962
Himachal Pradesh	1950	0.164584401417502	0.164584401417502	0.164584401417502
Jammu & Kashmir and Ladakh	1950	0.180857788454633	0.180857788454633	0.180857788454633
Jharkhand	1950	0.157099074710007	0.157099074710007	0.157099074710007
Karnataka	1950	0.20334838896376	0.20334838896376	0.20334838896376
Kerala	1950	0.247439061870823	0.247439061870823	0.247439061870823
Madhya Pradesh	1950	0.140158273903396	0.140158273903396	0.140158273903396
Maharashtra	1950	0.237752695211085	0.237752695211085	0.237752695211085
Manipur	1950	0.172359489479087	0.172359489479087	0.172359489479087
Meghalaya	1950	0.18675787565827	0.18675787565827	0.18675787565827
Mizoram	1950	0.207113315271051	0.207113315271051	0.207113315271051
Nagaland	1950	0.197176253201332	0.197176253201332	0.197176253201332
Odisha	1950	0.152146102660562	0.152146102660562	0.152146102660562
Punjab	1950	0.22634934717265	0.22634934717265	0.22634934717265
Rajasthan	1950	0.150999491055667	0.150999491055667	0.150999491055667
Sikkim	1950	0.152552436543195	0.152552436543195	0.152552436543195
Tamil Nadu	1950	0.215097572041239	0.215097572041239	0.215097572041239
Telangana	1950	0.145049778858696	0.145049778858696	0.145049778858696
Tripura	1950	0.202536544329841	0.202536544329841	0.202536544329841
Uttar Pradesh	1950	0.158265649430315	0.158265649430315	0.158265649430315
Uttarakhand	1950	0.200488587727697	0.200488587727697	0.200488587727697
West Bengal	1950	0.2138517438667	0.2138517438667	0.2138517438667
Oslo	1950	0.712852300444724	0.712852300444724	0.712852300444724
Rogaland	1950	0.650037727697438	0.650037727697438	0.650037727697438
M?re og Romsdal	1950	0.63388578424345	0.63388578424345	0.63388578424345
Nordland	1950	0.621341660850852	0.621341660850852	0.621341660850852
Sweden except Stockholm	1950	0.628219138789647	0.628219138789647	0.628219138789647
Stockholm	1950	0.706836166481954	0.706836166481954	0.706836166481954
Hokkaidō	1950	0.538429375436636	0.538429375436636	0.538429375436636
Aomori	1950	0.482924481322982	0.482924481322982	0.482924481322982
Iwate	1950	0.48458369640227	0.48458369640227	0.48458369640227
Miyagi	1950	0.522680192986941	0.522680192986941	0.522680192986941
Akita	1950	0.508231641523459	0.508231641523459	0.508231641523459
Yamagata	1950	0.499093849433389	0.499093849433389	0.499093849433389
Fukushima	1950	0.499350015410076	0.499350015410076	0.499350015410076
Ibaraki	1950	0.508731201657873	0.508731201657873	0.508731201657873
Tochigi	1950	0.523301751590158	0.523301751590158	0.523301751590158
Gunma	1950	0.517353327362866	0.517353327362866	0.517353327362866
Saitama	1950	0.523857384556769	0.523857384556769	0.523857384556769
Chiba	1950	0.526312805079936	0.526312805079936	0.526312805079936
Tōkyō	1950	0.647961491749705	0.647961491749705	0.647961491749705
Kanagawa	1950	0.585392013692672	0.585392013692672	0.585392013692672
Niigata	1950	0.510307514888988	0.510307514888988	0.510307514888988
Toyama	1950	0.527438510421881	0.527438510421881	0.527438510421881
Ishikawa	1950	0.516433295069126	0.516433295069126	0.516433295069126
Fukui	1950	0.514305046642948	0.514305046642948	0.514305046642948
Yamanashi	1950	0.522148360882792	0.522148360882792	0.522148360882792
Nagano	1950	0.526220910365003	0.526220910365003	0.526220910365003
Gifu	1950	0.524979325648675	0.524979325648675	0.524979325648675
Shizuoka	1950	0.537267989755671	0.537267989755671	0.537267989755671
Aichi	1950	0.553003423158144	0.553003423158144	0.553003423158144
Mie	1950	0.524844169657948	0.524844169657948	0.524844169657948
Shiga	1950	0.540730671705692	0.540730671705692	0.540730671705692
Kyōto	1950	0.569164644475103	0.569164644475103	0.569164644475103
ōsaka	1950	0.580290436928205	0.580290436928205	0.580290436928205
Hyōgo	1950	0.570574965030678	0.570574965030678	0.570574965030678
Nara	1950	0.553205777411298	0.553205777411298	0.553205777411298
Wakayama	1950	0.531670738533408	0.531670738533408	0.531670738533408
Tottori	1950	0.519531733975015	0.519531733975015	0.519531733975015
Shimane	1950	0.498182287740591	0.498182287740591	0.498182287740591
Okayama	1950	0.526736277380375	0.526736277380375	0.526736277380375
Hiroshima	1950	0.54165982150135	0.54165982150135	0.54165982150135
Yamaguchi	1950	0.543696508343674	0.543696508343674	0.543696508343674
Tokushima	1950	0.504898893672974	0.504898893672974	0.504898893672974
Kagawa	1950	0.529421589302113	0.529421589302113	0.529421589302113
Ehime	1950	0.522310044051673	0.522310044051673	0.522310044051673
Kōchi	1950	0.498104604346135	0.498104604346135	0.498104604346135
Fukuoka	1950	0.55719676995249	0.55719676995249	0.55719676995249
Saga	1950	0.512640985467235	0.512640985467235	0.512640985467235
Nagasaki	1950	0.504863269515264	0.504863269515264	0.504863269515264
Kumamoto	1950	0.502968626497727	0.502968626497727	0.502968626497727
ōita	1950	0.518977940968601	0.518977940968601	0.518977940968601
Miyazaki	1950	0.492755019603566	0.492755019603566	0.492755019603566
Kagoshima	1950	0.495007372366736	0.495007372366736	0.495007372366736
Okinawa	1950	0.455427212261573	0.455427212261573	0.455427212261573
Baringo	1950	0.10021618899872	0.10021618899872	0.10021618899872
Bomet	1950	0.0780394509863243	0.0780394509863243	0.0780394509863243
Bungoma	1950	0.0613637840597307	0.0613637840597307	0.0613637840597307
Busia	1950	0.101597450157902	0.101597450157902	0.101597450157902
Elgeyo-Marakwet	1950	0.0765237757940301	0.0765237757940301	0.0765237757940301
Embu	1950	0.131148972591384	0.131148972591384	0.131148972591384
Garissa	1950	0.0603102325726149	0.0603102325726149	0.0603102325726149
Homa Bay	1950	0.0949020978668562	0.0949020978668562	0.0949020978668562
Isiolo	1950	0.0902972100971996	0.0902972100971996	0.0902972100971996
Kajiado	1950	0.0861850351041153	0.0861850351041153	0.0861850351041153
Kakamega	1950	0.0764357597094402	0.0764357597094402	0.0764357597094402
Kericho	1950	0.100019084861632	0.100019084861632	0.100019084861632
Kiambu	1950	0.162365397187685	0.162365397187685	0.162365397187685
Kilifi	1950	0.112229770327623	0.112229770327623	0.112229770327623
Kirinyaga	1950	0.117213337530251	0.117213337530251	0.117213337530251
Kisii	1950	0.0451647436381244	0.0451647436381244	0.0451647436381244
Kisumu	1950	0.100152690196473	0.100152690196473	0.100152690196473
Kitui	1950	0.0856292915962152	0.0856292915962152	0.0856292915962152
Kwale	1950	0.100641319149915	0.100641319149915	0.100641319149915
Laikipia	1950	0.127648199128375	0.127648199128375	0.127648199128375
Lamu	1950	0.105124286109613	0.105124286109613	0.105124286109613
Machakos	1950	0.146171593987394	0.146171593987394	0.146171593987394
Makueni	1950	0.0920495763948042	0.0920495763948042	0.0920495763948042
Mandera	1950	0.0608632615171874	0.0608632615171874	0.0608632615171874
Marsabit	1950	0.0913729087736538	0.0913729087736538	0.0913729087736538
Meru	1950	0.111958850747171	0.111958850747171	0.111958850747171
Migori	1950	0.147057030596038	0.147057030596038	0.147057030596038
Mombasa	1950	0.180233532305649	0.180233532305649	0.180233532305649
Murang'a	1950	0.140276308682574	0.140276308682574	0.140276308682574
Nairobi	1950	0.250245422607254	0.250245422607254	0.250245422607254
Nakuru	1950	0.137996946022541	0.137996946022541	0.137996946022541
Nandi	1950	0.0927130863316051	0.0927130863316051	0.0927130863316051
Narok	1950	0.0916006162204265	0.0916006162204265	0.0916006162204265
Nyamira	1950	0.12650397956005	0.12650397956005	0.12650397956005
Nyandarua	1950	0.08116972963011	0.08116972963011	0.08116972963011
Nyeri	1950	0.145876193046768	0.145876193046768	0.145876193046768
Samburu	1950	0.0951512798100608	0.0951512798100608	0.0951512798100608
Siaya	1950	0.0521558783065234	0.0521558783065234	0.0521558783065234
Taita Taveta	1950	0.125900606449021	0.125900606449021	0.125900606449021
Tana River	1950	0.0701209803512375	0.0701209803512375	0.0701209803512375
Tharaka Nithi	1950	0.104562049710293	0.104562049710293	0.104562049710293
Trans Nzoia	1950	0.14262991515148	0.14262991515148	0.14262991515148
Turkana	1950	0.0733995714814269	0.0733995714814269	0.0733995714814269
Uasin Gishu	1950	0.128535792393768	0.128535792393768	0.128535792393768
Vihiga	1950	0.128542754519601	0.128542754519601	0.128542754519601
Wajir	1950	0.0628600641174124	0.0628600641174124	0.0628600641174124
West Pokot	1950	0.0800537673605941	0.0800537673605941	0.0800537673605941
Other Union Territories	1950	0.254330880510327	0.254330880510327	0.254330880510327
Darlington	1950	0.569063657523378	0.569063657523378	0.569063657523378
Northumberland	1950	0.559512358518882	0.559512358518882	0.559512358518882
Stockton-on-Tees	1950	0.565542755936423	0.565542755936423	0.565542755936423
Newcastle upon Tyne	1950	0.592004618467795	0.592004618467795	0.592004618467795
North Tyneside	1950	0.56167060680435	0.56167060680435	0.56167060680435
Redcar and Cleveland	1950	0.531615675063844	0.531615675063844	0.531615675063844
County Durham	1950	0.545310580246985	0.545310580246985	0.545310580246985
Gateshead	1950	0.553517611159273	0.553517611159273	0.553517611159273
Middlesbrough	1950	0.527068796894899	0.527068796894899	0.527068796894899
South Tyneside	1950	0.525941693443692	0.525941693443692	0.525941693443692
Sunderland	1950	0.533962086924926	0.533962086924926	0.533962086924926
Hartlepool	1950	0.525456465054792	0.525456465054792	0.525456465054792
Cheshire East	1950	0.630427145459734	0.630427145459734	0.630427145459734
Stockport	1950	0.603439585730209	0.603439585730209	0.603439585730209
Trafford	1950	0.63570307406152	0.63570307406152	0.63570307406152
Cheshire West and Chester	1950	0.614447482888856	0.614447482888856	0.614447482888856
Sefton	1950	0.569585794640674	0.569585794640674	0.569585794640674
Lancashire	1950	0.579221347175012	0.579221347175012	0.579221347175012
Cumbria	1950	0.577540496395352	0.577540496395352	0.577540496395352
Bolton	1950	0.549102045094458	0.549102045094458	0.549102045094458
Wirral	1950	0.558790028591456	0.558790028591456	0.558790028591456
Bury	1950	0.570927898336528	0.570927898336528	0.570927898336528
St Helens	1950	0.543159602153355	0.543159602153355	0.543159602153355
Warrington	1950	0.608946443530566	0.608946443530566	0.608946443530566
Oldham	1950	0.530217177656078	0.530217177656078	0.530217177656078
Rochdale	1950	0.533987857180745	0.533987857180745	0.533987857180745
Wigan	1950	0.540354005836953	0.540354005836953	0.540354005836953
Halton	1950	0.555353966195642	0.555353966195642	0.555353966195642
Liverpool	1950	0.564128306487723	0.564128306487723	0.564128306487723
Tameside	1950	0.54006589232801	0.54006589232801	0.54006589232801
Salford	1950	0.558782835880079	0.558782835880079	0.558782835880079
Blackburn with Darwen	1950	0.525727257421622	0.525727257421622	0.525727257421622
Knowsley	1950	0.529311839648989	0.529311839648989	0.529311839648989
Blackpool	1950	0.53117354653328	0.53117354653328	0.53117354653328
Manchester	1950	0.586517416432017	0.586517416432017	0.586517416432017
North Yorkshire	1950	0.590313429860063	0.590313429860063	0.590313429860063
East Riding of Yorkshire	1950	0.574029767621096	0.574029767621096	0.574029767621096
York	1950	0.62820045739571	0.62820045739571	0.62820045739571
North East Lincolnshire	1950	0.520481392386515	0.520481392386515	0.520481392386515
Calderdale	1950	0.555930196457252	0.555930196457252	0.555930196457252
North Lincolnshire	1950	0.566127695431516	0.566127695431516	0.566127695431516
Bradford	1950	0.527565431831621	0.527565431831621	0.527565431831621
Kirklees	1950	0.545296915934268	0.545296915934268	0.545296915934268
Leeds	1950	0.58789335457318	0.58789335457318	0.58789335457318
Sheffield	1950	0.582593822766551	0.582593822766551	0.582593822766551
Wakefield	1950	0.532276865567122	0.532276865567122	0.532276865567122
Rotherham	1950	0.527581411479721	0.527581411479721	0.527581411479721
Doncaster	1950	0.519446004242723	0.519446004242723	0.519446004242723
Kingston upon Hull, City of	1950	0.51899403463775	0.51899403463775	0.51899403463775
Barnsley	1950	0.516494878316569	0.516494878316569	0.516494878316569
Northamptonshire	1950	0.567078579582415	0.567078579582415	0.567078579582415
Leicestershire	1950	0.589817360478333	0.589817360478333	0.589817360478333
Lincolnshire	1950	0.555545743190096	0.555545743190096	0.555545743190096
Rutland	1950	0.605750895718917	0.605750895718917	0.605750895718917
Derby	1950	0.563087954542173	0.563087954542173	0.563087954542173
Derbyshire	1950	0.55551684096656	0.55551684096656	0.55551684096656
Nottinghamshire	1950	0.555788730773485	0.555788730773485	0.555788730773485
Nottingham	1950	0.567214918254601	0.567214918254601	0.567214918254601
Leicester	1950	0.530102761458573	0.530102761458573	0.530102761458573
Warwickshire	1950	0.598158944047151	0.598158944047151	0.598158944047151
Herefordshire, County of	1950	0.57071708052717	0.57071708052717	0.57071708052717
Solihull	1950	0.609891955861294	0.609891955861294	0.609891955861294
Shropshire	1950	0.576845140119394	0.576845140119394	0.576845140119394
Worcestershire	1950	0.57620441026768	0.57620441026768	0.57620441026768
Staffordshire	1950	0.566887273697101	0.566887273697101	0.566887273697101
Dudley	1950	0.541767102615324	0.541767102615324	0.541767102615324
Coventry	1950	0.571879934491269	0.571879934491269	0.571879934491269
Telford and Wrekin	1950	0.558438481945985	0.558438481945985	0.558438481945985
Stoke-on-Trent	1950	0.519334691204255	0.519334691204255	0.519334691204255
Walsall	1950	0.523199469014343	0.523199469014343	0.523199469014343
Wolverhampton	1950	0.534096193251709	0.534096193251709	0.534096193251709
Birmingham	1950	0.547425735490697	0.547425735490697	0.547425735490697
Sandwell	1950	0.514488464384439	0.514488464384439	0.514488464384439
Bedford	1950	0.588351252051029	0.588351252051029	0.588351252051029
Central Bedfordshire	1950	0.58657405297542	0.58657405297542	0.58657405297542
Suffolk	1950	0.56870380803299	0.56870380803299	0.56870380803299
Hertfordshire	1950	0.62829040166058	0.62829040166058	0.62829040166058
Essex	1950	0.573187087514078	0.573187087514078	0.573187087514078
Cambridgeshire	1950	0.623299138580496	0.623299138580496	0.623299138580496
Thurrock	1950	0.556858105314785	0.556858105314785	0.556858105314785
Norfolk	1950	0.566623432332158	0.566623432332158	0.566623432332158
Southend-on-Sea	1950	0.547511739839324	0.547511739839324	0.547511739839324
Peterborough	1950	0.559541141819754	0.559541141819754	0.559541141819754
Luton	1950	0.55429873859737	0.55429873859737	0.55429873859737
Richmond upon Thames	1950	0.677994613647424	0.677994613647424	0.677994613647424
Kensington and Chelsea	1950	0.706921114272619	0.706921114272619	0.706921114272619
Barnet	1950	0.609994224363288	0.609994224363288	0.609994224363288
Westminster	1950	0.735091086086575	0.735091086086575	0.735091086086575
Bromley	1950	0.599915064531778	0.599915064531778	0.599915064531778
Bexley	1950	0.554120675712901	0.554120675712901	0.554120675712901
Redbridge	1950	0.571329633216374	0.571329633216374	0.571329633216374
Merton	1950	0.600019648435467	0.600019648435467	0.600019648435467
Brent	1950	0.570567923564624	0.570567923564624	0.570567923564624
Hillingdon	1950	0.609176338601618	0.609176338601618	0.609176338601618
Havering	1950	0.549779359697474	0.549779359697474	0.549779359697474
Kingston upon Thames	1950	0.645601424121881	0.645601424121881	0.645601424121881
Sutton	1950	0.572706420836501	0.572706420836501	0.572706420836501
Harrow	1950	0.594410262063352	0.594410262063352	0.594410262063352
Enfield	1950	0.560162305098755	0.560162305098755	0.560162305098755
Croydon	1950	0.571158425997752	0.571158425997752	0.571158425997752
Hammersmith and Fulham	1950	0.659274253523608	0.659274253523608	0.659274253523608
Ealing	1950	0.592713606699463	0.592713606699463	0.592713606699463
Greenwich	1950	0.54753804400651	0.54753804400651	0.54753804400651
Wandsworth	1950	0.635639938359321	0.635639938359321	0.635639938359321
Waltham Forest	1950	0.535211737549054	0.535211737549054	0.535211737549054
Camden	1950	0.716813381131069	0.716813381131069	0.716813381131069
Lambeth	1950	0.601520411294399	0.601520411294399	0.601520411294399
Lewisham	1950	0.558488585501803	0.558488585501803	0.558488585501803
Hounslow	1950	0.596854922011843	0.596854922011843	0.596854922011843
Southwark	1950	0.612431223371959	0.612431223371959	0.612431223371959
Newham	1950	0.520097175416772	0.520097175416772	0.520097175416772
Barking and Dagenham	1950	0.513853287739491	0.513853287739491	0.513853287739491
Haringey	1950	0.580485376014614	0.580485376014614	0.580485376014614
Hackney	1950	0.623975483269267	0.623975483269267	0.623975483269267
Islington	1950	0.653273828719516	0.653273828719516	0.653273828719516
Tower Hamlets	1950	0.582109667887109	0.582109667887109	0.582109667887109
Wokingham	1950	0.699538166521925	0.699538166521925	0.699538166521925
Buckinghamshire	1950	0.66589004091322	0.66589004091322	0.66589004091322
Surrey	1950	0.680445913509206	0.680445913509206	0.680445913509206
Windsor and Maidenhead	1950	0.688232646707136	0.688232646707136	0.688232646707136
West Berkshire	1950	0.669591401893457	0.669591401893457	0.669591401893457
Hampshire	1950	0.634567837309942	0.634567837309942	0.634567837309942
Bracknell Forest	1950	0.65080651097809	0.65080651097809	0.65080651097809
West Sussex	1950	0.622821581146037	0.622821581146037	0.622821581146037
Oxfordshire	1950	0.665986618060175	0.665986618060175	0.665986618060175
Reading	1950	0.665750952952872	0.665750952952872	0.665750952952872
Kent	1950	0.600515762884902	0.600515762884902	0.600515762884902
Brighton and Hove	1950	0.651188411549498	0.651188411549498	0.651188411549498
Medway	1950	0.568535143931971	0.568535143931971	0.568535143931971
East Sussex	1950	0.592407455507527	0.592407455507527	0.592407455507527
Portsmouth	1950	0.611750214557384	0.611750214557384	0.611750214557384
Isle of Wight	1950	0.573773031655723	0.573773031655723	0.573773031655723
Milton Keynes	1950	0.628235509970046	0.628235509970046	0.628235509970046
Southampton	1950	0.617320646606827	0.617320646606827	0.617320646606827
Slough	1950	0.626753911015435	0.626753911015435	0.626753911015435
South Gloucestershire	1950	0.63838150542166	0.63838150542166	0.63838150542166
Dorset	1950	0.607794576718821	0.607794576718821	0.607794576718821
Wiltshire	1950	0.614315405256913	0.614315405256913	0.614315405256913
North Somerset	1950	0.602147846320204	0.602147846320204	0.602147846320204
Devon	1950	0.607324817753083	0.607324817753083	0.607324817753083
Poole	1950	0.616592545561329	0.616592545561329	0.616592545561329
Bath and North East Somerset	1950	0.653758079289494	0.653758079289494	0.653758079289494
Gloucestershire	1950	0.62392568119124	0.62392568119124	0.62392568119124
Somerset	1950	0.594863279926337	0.594863279926337	0.594863279926337
Swindon	1950	0.618863452027966	0.618863452027966	0.618863452027966
Torbay	1950	0.570953223030982	0.570953223030982	0.570953223030982
Bristol, City of	1950	0.639805833339444	0.639805833339444	0.639805833339444
Bournemouth	1950	0.609994676754321	0.609994676754321	0.609994676754321
Cornwall	1950	0.588252547245581	0.588252547245581	0.588252547245581
Plymouth	1950	0.582868105822824	0.582868105822824	0.582868105822824
Tigray	1950	0.0537651343777204	0.0537651343777204	0.0537651343777204
Afar	1950	0.0351671228210796	0.0351671228210796	0.0351671228210796
Amhara	1950	0.0348226814750886	0.0348226814750886	0.0348226814750886
Oromia	1950	0.0435934679846568	0.0435934679846568	0.0435934679846568
Somali	1950	0.03553712724737	0.03553712724737	0.03553712724737
Benishangul-Gumuz	1950	0.0270199706570454	0.0270199706570454	0.0270199706570454
Southern Nations, Nationalities, and Peoples with Sidama and South West Regions	1950	0.0416922484928224	0.0416922484928224	0.0416922484928224
Harari	1950	0.131834224522099	0.131834224522099	0.131834224522099
Gambella	1950	0.0602717762609458	0.0602717762609458	0.0602717762609458
Addis Ababa	1950	0.194662833926683	0.194662833926683	0.194662833926683
Dire Dawa	1950	0.132814322159769	0.132814322159769	0.132814322159769
Alborz	1950	0.227121453829258	0.227121453829258	0.227121453829258
Ardebil	1950	0.120229706028342	0.120229706028342	0.120229706028342
East Azarbayejan	1950	0.15694833285561	0.15694833285561	0.15694833285561
West Azarbayejan	1950	0.1377454085186	0.1377454085186	0.1377454085186
Bushehr	1950	0.164535009935715	0.164535009935715	0.164535009935715
Chahar Mahaal and Bakhtiari	1950	0.141998287991946	0.141998287991946	0.141998287991946
Fars	1950	0.17877511486722	0.17877511486722	0.17877511486722
Gilan	1950	0.173021089675972	0.173021089675972	0.173021089675972
Golestan	1950	0.131122226382959	0.131122226382959	0.131122226382959
Hamadan	1950	0.137508765105711	0.137508765105711	0.137508765105711
Hormozgan	1950	0.118433649997499	0.118433649997499	0.118433649997499
Ilam	1950	0.117100463015711	0.117100463015711	0.117100463015711
Isfahan	1950	0.190146558278616	0.190146558278616	0.190146558278616
Kerman	1950	0.14786134099095	0.14786134099095	0.14786134099095
Kermanshah	1950	0.141566870604611	0.141566870604611	0.141566870604611
North Khorasan	1950	0.136963889133206	0.136963889133206	0.136963889133206
Khorasan-e-Razavi	1950	0.154486615641343	0.154486615641343	0.154486615641343
South Khorasan	1950	0.130716275503707	0.130716275503707	0.130716275503707
Khuzestan	1950	0.137887780581455	0.137887780581455	0.137887780581455
Kohgiluyeh and Boyer-Ahmad	1950	0.118825124086878	0.118825124086878	0.118825124086878
Kurdistan	1950	0.121904796322675	0.121904796322675	0.121904796322675
Lorestan	1950	0.12244137929049	0.12244137929049	0.12244137929049
Markazi	1950	0.155027048385485	0.155027048385485	0.155027048385485
Mazandaran	1950	0.175964790068646	0.175964790068646	0.175964790068646
Qazvin	1950	0.159587126953951	0.159587126953951	0.159587126953951
Qom	1950	0.179838769998495	0.179838769998495	0.179838769998495
Semnan	1950	0.177577490758883	0.177577490758883	0.177577490758883
Sistan and Baluchistan	1950	0.112021914838713	0.112021914838713	0.112021914838713
Tehran	1950	0.305052544152601	0.305052544152601	0.305052544152601
Yazd	1950	0.154689132271957	0.154689132271957	0.154689132271957
Zanjan	1950	0.155539324961095	0.155539324961095	0.155539324961095
Tr?ndelag	1950	0.638265327729091	0.638265327729091	0.638265327729091
Azad Jammu & Kashmir	1950	0.129182152114761	0.129182152114761	0.129182152114761
Balochistan	1950	0.139493830270895	0.139493830270895	0.139493830270895
Gilgit-Baltistan	1950	0.0882302286743695	0.0882302286743695	0.0882302286743695
Islamabad Capital Territory	1950	0.250760913748631	0.250760913748631	0.250760913748631
Khyber Pakhtunkhwa	1950	0.128890546064703	0.128890546064703	0.128890546064703
Punjab	1950	0.154929921896765	0.154929921896765	0.154929921896765
Sindh	1950	0.169280806405517	0.169280806405517	0.169280806405517
Vestland	1950	0.65077858928773	0.65077858928773	0.65077858928773
Agder	1950	0.653525916407282	0.653525916407282	0.653525916407282
Vestfold og Telemark	1950	0.651561939994051	0.651561939994051	0.651561939994051
Innlandet	1950	0.634129556660696	0.634129556660696	0.634129556660696
Viken	1950	0.669202574502437	0.669202574502437	0.669202574502437
Troms og Finnmark	1950	0.621521223626344	0.621521223626344	0.621521223626344
Global	1951	0.371694090413311	0.371694090413311	0.371694090413311
Southeast Asia, East Asia, and Oceania	1951	0.211494366807131	0.211494366807131	0.211494366807131
East Asia	1951	0.201738110675908	0.201738110675908	0.201738110675908
China	1951	0.193051286183763	0.193051286183763	0.193051286183763
Democratic People's Republic of Korea	1951	0.329208848294643	0.329208848294643	0.329208848294643
Taiwan (Province of China)	1951	0.297780719110434	0.297780719110434	0.297780719110434
Southeast Asia	1951	0.227247284839267	0.227247284839267	0.227247284839267
Cambodia	1951	0.190000127339085	0.190000127339085	0.190000127339085
Indonesia	1951	0.200947244034432	0.200947244034432	0.200947244034432
Lao People's Democratic Republic	1951	0.137243894737724	0.137243894737724	0.137243894737724
Malaysia	1951	0.215775912278731	0.215775912278731	0.215775912278731
Maldives	1951	0.199264454467719	0.199264454467719	0.199264454467719
Myanmar	1951	0.14311666133165	0.14311666133165	0.14311666133165
Philippines	1951	0.340666317467796	0.340666317467796	0.340666317467796
Sri Lanka	1951	0.33345068199169	0.33345068199169	0.33345068199169
Thailand	1951	0.238122962589916	0.238122962589916	0.238122962589916
Timor-Leste	1951	0.10397008503993	0.10397008503993	0.10397008503993
Viet Nam	1951	0.211818895717906	0.211818895717906	0.211818895717906
Oceania	1951	0.222463448064131	0.222463448064131	0.222463448064131
Fiji	1951	0.302840274790875	0.302840274790875	0.302840274790875
Kiribati	1951	0.279640556868333	0.279640556868333	0.279640556868333
Marshall Islands	1951	0.241967415310992	0.241967415310992	0.241967415310992
Micronesia (Federated States of)	1951	0.238742151708764	0.238742151708764	0.238742151708764
Papua New Guinea	1951	0.140389623058882	0.140389623058882	0.140389623058882
Samoa	1951	0.287950355319635	0.287950355319635	0.287950355319635
Solomon Islands	1951	0.170671282667826	0.170671282667826	0.170671282667826
Tonga	1951	0.271533007369939	0.271533007369939	0.271533007369939
Vanuatu	1951	0.198838080678401	0.198838080678401	0.198838080678401
Central Europe, Eastern Europe, and Central Asia	1951	0.528858564688656	0.528858564688656	0.528858564688656
Central Asia	1951	0.434969133320195	0.434969133320195	0.434969133320195
Armenia	1951	0.454023955305287	0.454023955305287	0.454023955305287
Azerbaijan	1951	0.414169178523006	0.414169178523006	0.414169178523006
Georgia	1951	0.554569585247051	0.554569585247051	0.554569585247051
Kazakhstan	1951	0.450007679345247	0.450007679345247	0.450007679345247
Kyrgyzstan	1951	0.4414593582352	0.4414593582352	0.4414593582352
Mongolia	1951	0.308394264265647	0.308394264265647	0.308394264265647
Tajikistan	1951	0.31657119177403	0.31657119177403	0.31657119177403
Turkmenistan	1951	0.426231528601495	0.426231528601495	0.426231528601495
Uzbekistan	1951	0.373438651849257	0.373438651849257	0.373438651849257
Central Europe	1951	0.486887283368485	0.486887283368485	0.486887283368485
Albania	1951	0.351958678335611	0.351958678335611	0.351958678335611
Bosnia and Herzegovina	1951	0.297179584497042	0.297179584497042	0.297179584497042
Bulgaria	1951	0.475004103689158	0.475004103689158	0.475004103689158
Croatia	1951	0.475883508986196	0.475883508986196	0.475883508986196
Czechia	1951	0.576308858242908	0.576308858242908	0.576308858242908
Hungary	1951	0.506676630012183	0.506676630012183	0.506676630012183
North Macedonia	1951	0.415984927110917	0.415984927110917	0.415984927110917
Montenegro	1951	0.461607047591356	0.461607047591356	0.461607047591356
Poland	1951	0.495773827037599	0.495773827037599	0.495773827037599
Romania	1951	0.414242295678799	0.414242295678799	0.414242295678799
Serbia	1951	0.481182518592807	0.481182518592807	0.481182518592807
Slovakia	1951	0.526183112351166	0.526183112351166	0.526183112351166
Slovenia	1951	0.564426972258942	0.564426972258942	0.564426972258942
Eastern Europe	1951	0.557231215636544	0.557231215636544	0.557231215636544
Belarus	1951	0.48625252232499	0.48625252232499	0.48625252232499
Estonia	1951	0.563931954668718	0.563931954668718	0.563931954668718
Latvia	1951	0.573458016512066	0.573458016512066	0.573458016512066
Lithuania	1951	0.510457115174361	0.510457115174361	0.510457115174361
Republic of Moldova	1951	0.467301999520091	0.467301999520091	0.467301999520091
Russian Federation	1951	0.562538648216137	0.562538648216137	0.562538648216137
Ukraine	1951	0.553578935528938	0.553578935528938	0.553578935528938
High-income	1951	0.588131353421775	0.588131353421775	0.588131353421775
High-income Asia Pacific	1951	0.515708211971286	0.515708211971286	0.515708211971286
Brunei Darussalam	1951	0.376102975950005	0.376102975950005	0.376102975950005
Japan	1951	0.554506236256413	0.554506236256413	0.554506236256413
Republic of Korea	1951	0.30559976048158	0.30559976048158	0.30559976048158
Singapore	1951	0.31536793351966	0.31536793351966	0.31536793351966
Australasia	1951	0.567394689258741	0.567394689258741	0.567394689258741
Australia	1951	0.557513608324451	0.557513608324451	0.557513608324451
New Zealand	1951	0.600364904846087	0.600364904846087	0.600364904846087
Western Europe	1951	0.586146567010139	0.586146567010139	0.586146567010139
Andorra	1951	0.613073552303564	0.613073552303564	0.613073552303564
Austria	1951	0.604456955706733	0.604456955706733	0.604456955706733
Belgium	1951	0.576075573570681	0.576075573570681	0.576075573570681
Cyprus	1951	0.455536000070864	0.455536000070864	0.455536000070864
Denmark	1951	0.633744265647845	0.633744265647845	0.633744265647845
Finland	1951	0.568974085221864	0.568974085221864	0.568974085221864
France	1951	0.545592289698288	0.545592289698288	0.545592289698288
Germany	1951	0.645682046342886	0.645682046342886	0.645682046342886
Greece	1951	0.512960831572715	0.512960831572715	0.512960831572715
Iceland	1951	0.561914373051693	0.561914373051693	0.561914373051693
Ireland	1951	0.580197841487896	0.580197841487896	0.580197841487896
Israel	1951	0.502561464247615	0.502561464247615	0.502561464247615
Italy	1951	0.530982124707571	0.530982124707571	0.530982124707571
Luxembourg	1951	0.643615206384184	0.643615206384184	0.643615206384184
Malta	1951	0.42059451421224	0.42059451421224	0.42059451421224
Netherlands	1951	0.651465828057511	0.651465828057511	0.651465828057511
Norway	1951	0.65490963829189	0.65490963829189	0.65490963829189
Portugal	1951	0.424737683141767	0.424737683141767	0.424737683141767
Spain	1951	0.443869173175771	0.443869173175771	0.443869173175771
Sweden	1951	0.643372131183855	0.643372131183855	0.643372131183855
Switzerland	1951	0.751295373129989	0.751295373129989	0.751295373129989
United Kingdom	1951	0.591168076946965	0.591168076946965	0.591168076946965
Southern Latin America	1951	0.473016502813576	0.473016502813576	0.473016502813576
Argentina	1951	0.48248620628754	0.48248620628754	0.48248620628754
Chile	1951	0.440184667914101	0.440184667914101	0.440184667914101
Uruguay	1951	0.481436112393404	0.481436112393404	0.481436112393404
High-income North America	1951	0.611227566299183	0.611227566299183	0.611227566299183
Canada	1951	0.618084780443533	0.618084780443533	0.618084780443533
United States of America	1951	0.609981570203464	0.609981570203464	0.609981570203464
Latin America and Caribbean	1951	0.281450394045872	0.281450394045872	0.281450394045872
Caribbean	1951	0.328031489150306	0.328031489150306	0.328031489150306
Antigua and Barbuda	1951	0.333590434803242	0.333590434803242	0.333590434803242
Bahamas	1951	0.47962533970416	0.47962533970416	0.47962533970416
Barbados	1951	0.409530283479752	0.409530283479752	0.409530283479752
Belize	1951	0.28602772609207	0.28602772609207	0.28602772609207
Cuba	1951	0.382969180813038	0.382969180813038	0.382969180813038
Dominica	1951	0.378844682464037	0.378844682464037	0.378844682464037
Dominican Republic	1951	0.166551226102341	0.166551226102341	0.166551226102341
Grenada	1951	0.228274224919103	0.228274224919103	0.228274224919103
Guyana	1951	0.29044879270851	0.29044879270851	0.29044879270851
Haiti	1951	0.186820533814271	0.186820533814271	0.186820533814271
Jamaica	1951	0.361653473930385	0.361653473930385	0.361653473930385
Saint Lucia	1951	0.280254757045215	0.280254757045215	0.280254757045215
Saint Vincent and the Grenadines	1951	0.249887717032515	0.249887717032515	0.249887717032515
Suriname	1951	0.281092095297985	0.281092095297985	0.281092095297985
Trinidad and Tobago	1951	0.395692624804932	0.395692624804932	0.395692624804932
Andean Latin America	1951	0.293317926232119	0.293317926232119	0.293317926232119
Bolivia (Plurinational State of)	1951	0.25091119203882	0.25091119203882	0.25091119203882
Ecuador	1951	0.324568430992765	0.324568430992765	0.324568430992765
Peru	1951	0.293188663917387	0.293188663917387	0.293188663917387
Central Latin America	1951	0.281250054081845	0.281250054081845	0.281250054081845
Colombia	1951	0.27471792386405	0.27471792386405	0.27471792386405
Costa Rica	1951	0.312195446072984	0.312195446072984	0.312195446072984
El Salvador	1951	0.193761797662428	0.193761797662428	0.193761797662428
Guatemala	1951	0.205230594027416	0.205230594027416	0.205230594027416
Honduras	1951	0.184850757923612	0.184850757923612	0.184850757923612
Mexico	1951	0.290001466518734	0.290001466518734	0.290001466518734
Nicaragua	1951	0.214098279274286	0.214098279274286	0.214098279274286
Panama	1951	0.332443540148622	0.332443540148622	0.332443540148622
Venezuela (Bolivarian Republic of)	1951	0.323825558928736	0.323825558928736	0.323825558928736
Tropical Latin America	1951	0.257468882763437	0.257468882763437	0.257468882763437
Brazil	1951	0.256453132506357	0.256453132506357	0.256453132506357
Paraguay	1951	0.296722923828771	0.296722923828771	0.296722923828771
North Africa and Middle East	1951	0.19577122088826	0.19577122088826	0.19577122088826
North Africa and Middle East	1951	0.19577122088826	0.19577122088826	0.19577122088826
Algeria	1951	0.144471190142427	0.144471190142427	0.144471190142427
Bahrain	1951	0.237062270339486	0.237062270339486	0.237062270339486
Egypt	1951	0.232047501935811	0.232047501935811	0.232047501935811
Iran (Islamic Republic of)	1951	0.171542336152364	0.171542336152364	0.171542336152364
Iraq	1951	0.162480891724596	0.162480891724596	0.162480891724596
Jordan	1951	0.121085434876035	0.121085434876035	0.121085434876035
Kuwait	1951	0.327139952600824	0.327139952600824	0.327139952600824
Lebanon	1951	0.284146157544087	0.284146157544087	0.284146157544087
Libya	1951	0.15638421931335	0.15638421931335	0.15638421931335
Morocco	1951	0.101938916635722	0.101938916635722	0.101938916635722
Palestine	1951	0.146398147636573	0.146398147636573	0.146398147636573
Oman	1951	0.133079609988718	0.133079609988718	0.133079609988718
Qatar	1951	0.269160534857997	0.269160534857997	0.269160534857997
Saudi Arabia	1951	0.209905926299307	0.209905926299307	0.209905926299307
Syrian Arab Republic	1951	0.159444259510148	0.159444259510148	0.159444259510148
Tunisia	1951	0.155953676400275	0.155953676400275	0.155953676400275
Türkiye	1951	0.246350881690909	0.246350881690909	0.246350881690909
United Arab Emirates	1951	0.200453128928688	0.200453128928688	0.200453128928688
Yemen	1951	0.0861836631593235	0.0861836631593235	0.0861836631593235
South Asia	1951	0.184245537724124	0.184245537724124	0.184245537724124
South Asia	1951	0.184245537724124	0.184245537724124	0.184245537724124
Afghanistan	1951	0.114962170756501	0.114962170756501	0.114962170756501
Bangladesh	1951	0.103695803161589	0.103695803161589	0.103695803161589
Bhutan	1951	0.0543536705231305	0.0543536705231305	0.0543536705231305
India	1951	0.192258752468498	0.192258752468498	0.192258752468498
Nepal	1951	0.100391137739793	0.100391137739793	0.100391137739793
Pakistan	1951	0.154802950216746	0.154802950216746	0.154802950216746
Sub-Saharan Africa	1951	0.159593140743054	0.159593140743054	0.159593140743054
Central Sub-Saharan Africa	1951	0.156506741863458	0.156506741863458	0.156506741863458
Angola	1951	0.135915072476957	0.135915072476957	0.135915072476957
Central African Republic	1951	0.108530716240379	0.108530716240379	0.108530716240379
Congo	1951	0.169682517338767	0.169682517338767	0.169682517338767
Democratic Republic of the Congo	1951	0.153044538053892	0.153044538053892	0.153044538053892
Equatorial Guinea	1951	0.108354053588643	0.108354053588643	0.108354053588643
Gabon	1951	0.167644565817029	0.167644565817029	0.167644565817029
Eastern Sub-Saharan Africa	1951	0.120256619532086	0.120256619532086	0.120256619532086
Burundi	1951	0.102754614968974	0.102754614968974	0.102754614968974
Comoros	1951	0.123080339028553	0.123080339028553	0.123080339028553
Djibouti	1951	0.166458792506207	0.166458792506207	0.166458792506207
Eritrea	1951	0.0706109109183317	0.0706109109183317	0.0706109109183317
Ethiopia	1951	0.0581785792812515	0.0581785792812515	0.0581785792812515
Kenya	1951	0.12812949052512	0.12812949052512	0.12812949052512
Madagascar	1951	0.139505392961434	0.139505392961434	0.139505392961434
Malawi	1951	0.140130893446252	0.140130893446252	0.140130893446252
Mauritius	1951	0.299651548965663	0.299651548965663	0.299651548965663
Mozambique	1951	0.0940716454273697	0.0940716454273697	0.0940716454273697
Rwanda	1951	0.128583101176471	0.128583101176471	0.128583101176471
Seychelles	1951	0.373939673385454	0.373939673385454	0.373939673385454
Somalia	1951	0.0610339721834079	0.0610339721834079	0.0610339721834079
United Republic of Tanzania	1951	0.106698332185476	0.106698332185476	0.106698332185476
Uganda	1951	0.102054186765816	0.102054186765816	0.102054186765816
Zambia	1951	0.139528820034176	0.139528820034176	0.139528820034176
Southern Sub-Saharan Africa	1951	0.297643525071915	0.297643525071915	0.297643525071915
Botswana	1951	0.137445633883483	0.137445633883483	0.137445633883483
Lesotho	1951	0.161286951412543	0.161286951412543	0.161286951412543
Namibia	1951	0.218841174515775	0.218841174515775	0.218841174515775
South Africa	1951	0.327933629465174	0.327933629465174	0.327933629465174
Eswatini	1951	0.14496121404257	0.14496121404257	0.14496121404257
Zimbabwe	1951	0.184706318692143	0.184706318692143	0.184706318692143
Western Sub-Saharan Africa	1951	0.142193858299029	0.142193858299029	0.142193858299029
Benin	1951	0.108744575505822	0.108744575505822	0.108744575505822
Burkina Faso	1951	0.0567631650428331	0.0567631650428331	0.0567631650428331
Cameroon	1951	0.138337356720774	0.138337356720774	0.138337356720774
Cabo Verde	1951	0.135189471348179	0.135189471348179	0.135189471348179
Chad	1951	0.05826393710081	0.05826393710081	0.05826393710081
C?te d'Ivoire	1951	0.118888320429279	0.118888320429279	0.118888320429279
Gambia	1951	0.121437137987296	0.121437137987296	0.121437137987296
Ghana	1951	0.246424008378377	0.246424008378377	0.246424008378377
Guinea	1951	0.060476996625608	0.060476996625608	0.060476996625608
Guinea-Bissau	1951	0.0671024614372524	0.0671024614372524	0.0671024614372524
Liberia	1951	0.144715701048865	0.144715701048865	0.144715701048865
Mali	1951	0.0597750742741082	0.0597750742741082	0.0597750742741082
Mauritania	1951	0.182057773104968	0.182057773104968	0.182057773104968
Niger	1951	0.0465004043330036	0.0465004043330036	0.0465004043330036
Nigeria	1951	0.154249460399149	0.154249460399149	0.154249460399149
Sao Tome and Principe	1951	0.179612610192807	0.179612610192807	0.179612610192807
Senegal	1951	0.105897155480383	0.105897155480383	0.105897155480383
Sierra Leone	1951	0.117369623318269	0.117369623318269	0.117369623318269
Togo	1951	0.105632200185885	0.105632200185885	0.105632200185885
American Samoa	1951	0.490904299409707	0.490904299409707	0.490904299409707
Bermuda	1951	0.428151293587108	0.428151293587108	0.428151293587108
Cook Islands	1951	0.341190509987947	0.341190509987947	0.341190509987947
Greenland	1951	0.564103814013881	0.564103814013881	0.564103814013881
Guam	1951	0.55939074620934	0.55939074620934	0.55939074620934
Monaco	1951	0.691976384402188	0.691976384402188	0.691976384402188
Nauru	1951	0.404308721550201	0.404308721550201	0.404308721550201
Niue	1951	0.343714130551818	0.343714130551818	0.343714130551818
Northern Mariana Islands	1951	0.453066067628925	0.453066067628925	0.453066067628925
Palau	1951	0.428451010253922	0.428451010253922	0.428451010253922
Puerto Rico	1951	0.405243523149909	0.405243523149909	0.405243523149909
Saint Kitts and Nevis	1951	0.330385502479576	0.330385502479576	0.330385502479576
San Marino	1951	0.647610197745947	0.647610197745947	0.647610197745947
Tokelau	1951	0.299993421562539	0.299993421562539	0.299993421562539
Tuvalu	1951	0.267062839542423	0.267062839542423	0.267062839542423
United States Virgin Islands	1951	0.443091352704437	0.443091352704437	0.443091352704437
Northern Ireland	1951	0.493008038604229	0.493008038604229	0.493008038604229
Scotland	1951	0.581943784520758	0.581943784520758	0.581943784520758
South Sudan	1951	0.131979708981122	0.131979708981122	0.131979708981122
Eastern Cape	1951	0.273231260146759	0.273231260146759	0.273231260146759
Free State	1951	0.312130101357533	0.312130101357533	0.312130101357533
Gauteng	1951	0.450840649764929	0.450840649764929	0.450840649764929
KwaZulu-Natal	1951	0.279688972518183	0.279688972518183	0.279688972518183
Limpopo	1951	0.197371376587729	0.197371376587729	0.197371376587729
Mpumalanga	1951	0.219393061073442	0.219393061073442	0.219393061073442
North-West	1951	0.274069027278618	0.274069027278618	0.274069027278618
Northern Cape	1951	0.32874181624575	0.32874181624575	0.32874181624575
Western Cape	1951	0.465846472900032	0.465846472900032	0.465846472900032
Sudan	1951	0.135837009161826	0.135837009161826	0.135837009161826
Alabama	1951	0.546032464613262	0.546032464613262	0.546032464613262
Alaska	1951	0.587693434039954	0.587693434039954	0.587693434039954
Arizona	1951	0.600731934356735	0.600731934356735	0.600731934356735
Arkansas	1951	0.540159055249821	0.540159055249821	0.540159055249821
California	1951	0.646345487615796	0.646345487615796	0.646345487615796
Colorado	1951	0.63650175479758	0.63650175479758	0.63650175479758
Connecticut	1951	0.657593691123236	0.657593691123236	0.657593691123236
Delaware	1951	0.626404982132979	0.626404982132979	0.626404982132979
District of Columbia	1951	0.651310808479899	0.651310808479899	0.651310808479899
Florida	1951	0.606326708013769	0.606326708013769	0.606326708013769
Georgia	1951	0.541760777268448	0.541760777268448	0.541760777268448
Hawaii	1951	0.609495470042227	0.609495470042227	0.609495470042227
Idaho	1951	0.591346458122296	0.591346458122296	0.591346458122296
Illinois	1951	0.625739868222073	0.625739868222073	0.625739868222073
Indiana	1951	0.603758673199239	0.603758673199239	0.603758673199239
Iowa	1951	0.621394739796025	0.621394739796025	0.621394739796025
Kansas	1951	0.622242528474847	0.622242528474847	0.622242528474847
Kentucky	1951	0.547532758774925	0.547532758774925	0.547532758774925
Louisiana	1951	0.540073289756503	0.540073289756503	0.540073289756503
Maine	1951	0.588805198920179	0.588805198920179	0.588805198920179
Maryland	1951	0.629678015099403	0.629678015099403	0.629678015099403
Massachusetts	1951	0.664099488005005	0.664099488005005	0.664099488005005
Michigan	1951	0.615421614822843	0.615421614822843	0.615421614822843
Minnesota	1951	0.630716163101629	0.630716163101629	0.630716163101629
Mississippi	1951	0.511662226697771	0.511662226697771	0.511662226697771
Missouri	1951	0.599608216955074	0.599608216955074	0.599608216955074
Montana	1951	0.621053941693744	0.621053941693744	0.621053941693744
Nebraska	1951	0.627351858794985	0.627351858794985	0.627351858794985
Nevada	1951	0.609788395160743	0.609788395160743	0.609788395160743
New Hampshire	1951	0.61460514140315	0.61460514140315	0.61460514140315
New Jersey	1951	0.648593812787749	0.648593812787749	0.648593812787749
New Mexico	1951	0.570704509133455	0.570704509133455	0.570704509133455
New York	1951	0.643682514270962	0.643682514270962	0.643682514270962
North Carolina	1951	0.558658234196972	0.558658234196972	0.558658234196972
North Dakota	1951	0.586796714884607	0.586796714884607	0.586796714884607
Ohio	1951	0.61115966902489	0.61115966902489	0.61115966902489
Oklahoma	1951	0.580956518353757	0.580956518353757	0.580956518353757
Oregon	1951	0.637681701370455	0.637681701370455	0.637681701370455
Pennsylvania	1951	0.62565322558588	0.62565322558588	0.62565322558588
Rhode Island	1951	0.619562123582688	0.619562123582688	0.619562123582688
South Carolina	1951	0.544069804742472	0.544069804742472	0.544069804742472
South Dakota	1951	0.59814845574492	0.59814845574492	0.59814845574492
Tennessee	1951	0.552543051844952	0.552543051844952	0.552543051844952
Texas	1951	0.572483566219871	0.572483566219871	0.572483566219871
Utah	1951	0.622645686277874	0.622645686277874	0.622645686277874
Vermont	1951	0.605973012577955	0.605973012577955	0.605973012577955
Virginia	1951	0.600076141784032	0.600076141784032	0.600076141784032
Washington	1951	0.639160833326096	0.639160833326096	0.639160833326096
West Virginia	1951	0.563940282589015	0.563940282589015	0.563940282589015
Wisconsin	1951	0.626154656012316	0.626154656012316	0.626154656012316
Wyoming	1951	0.606778208694083	0.606778208694083	0.606778208694083
North East England	1951	0.548962501641625	0.548962501641625	0.548962501641625
North West England	1951	0.572994555840335	0.572994555840335	0.572994555840335
Yorkshire and the Humber	1951	0.556579981655861	0.556579981655861	0.556579981655861
East Midlands	1951	0.557386934664484	0.557386934664484	0.557386934664484
West Midlands	1951	0.552702938582719	0.552702938582719	0.552702938582719
East of England	1951	0.585262889274304	0.585262889274304	0.585262889274304
Greater London	1951	0.625404186616491	0.625404186616491	0.625404186616491
South East England	1951	0.639973739856132	0.639973739856132	0.639973739856132
South West England	1951	0.609553658013699	0.609553658013699	0.609553658013699
Wales	1951	0.563266823974691	0.563266823974691	0.563266823974691
Aguascalientes	1951	0.281130984024222	0.281130984024222	0.281130984024222
Baja California	1951	0.340803641375364	0.340803641375364	0.340803641375364
Baja California Sur	1951	0.312254084876552	0.312254084876552	0.312254084876552
Campeche	1951	0.283447773899854	0.283447773899854	0.283447773899854
Coahuila	1951	0.306327761502848	0.306327761502848	0.306327761502848
Colima	1951	0.270286539320848	0.270286539320848	0.270286539320848
Chiapas	1951	0.236564856132391	0.236564856132391	0.236564856132391
Chihuahua	1951	0.303862308691162	0.303862308691162	0.303862308691162
Mexico City	1951	0.404001205082747	0.404001205082747	0.404001205082747
Durango	1951	0.260186051029091	0.260186051029091	0.260186051029091
Guanajuato	1951	0.235020983075224	0.235020983075224	0.235020983075224
Guerrero	1951	0.215532184781893	0.215532184781893	0.215532184781893
Hidalgo	1951	0.237719626064109	0.237719626064109	0.237719626064109
Jalisco	1951	0.294185611464103	0.294185611464103	0.294185611464103
México	1951	0.284071317702886	0.284071317702886	0.284071317702886
Michoacán de Ocampo	1951	0.237415890859914	0.237415890859914	0.237415890859914
Morelos	1951	0.289999382424793	0.289999382424793	0.289999382424793
Nayarit	1951	0.24213420889489	0.24213420889489	0.24213420889489
Nuevo León	1951	0.325322644847428	0.325322644847428	0.325322644847428
Oaxaca	1951	0.233878898143525	0.233878898143525	0.233878898143525
Puebla	1951	0.255874409997009	0.255874409997009	0.255874409997009
Querétaro	1951	0.260944799192202	0.260944799192202	0.260944799192202
Quintana Roo	1951	0.257887890093622	0.257887890093622	0.257887890093622
San Luis Potosí	1951	0.251185389493253	0.251185389493253	0.251185389493253
Sinaloa	1951	0.268117736822222	0.268117736822222	0.268117736822222
Sonora	1951	0.314250370038104	0.314250370038104	0.314250370038104
Tabasco	1951	0.242065989427818	0.242065989427818	0.242065989427818
Tamaulipas	1951	0.308755718712631	0.308755718712631	0.308755718712631
Tlaxcala	1951	0.236666850135918	0.236666850135918	0.236666850135918
Veracruz de Ignacio de la Llave	1951	0.272509639273628	0.272509639273628	0.272509639273628
Yucatán	1951	0.298686582761052	0.298686582761052	0.298686582761052
Zacatecas	1951	0.24196417766042	0.24196417766042	0.24196417766042
Aceh	1951	0.224023336059228	0.224023336059228	0.224023336059228
North Sumatra	1951	0.215141387455745	0.215141387455745	0.215141387455745
West Sumatra	1951	0.209850314748145	0.209850314748145	0.209850314748145
Riau	1951	0.241478153968754	0.241478153968754	0.241478153968754
Jambi	1951	0.178100376199277	0.178100376199277	0.178100376199277
South Sumatra	1951	0.21153773128725	0.21153773128725	0.21153773128725
Bengkulu	1951	0.163498774856647	0.163498774856647	0.163498774856647
Lampung	1951	0.160822381404717	0.160822381404717	0.160822381404717
Bangka-Belitung Islands	1951	0.233510332345951	0.233510332345951	0.233510332345951
Riau Islands	1951	0.315831931038132	0.315831931038132	0.315831931038132
North Kalimantan	1951	0.328226064053937	0.328226064053937	0.328226064053937
Jakarta	1951	0.310895149370676	0.310895149370676	0.310895149370676
West Java	1951	0.200179389280557	0.200179389280557	0.200179389280557
Central Java	1951	0.181756805464161	0.181756805464161	0.181756805464161
Yogyakarta	1951	0.177752247389231	0.177752247389231	0.177752247389231
East Java	1951	0.18918113768472	0.18918113768472	0.18918113768472
Banten	1951	0.226412603034833	0.226412603034833	0.226412603034833
Bali	1951	0.179048577815201	0.179048577815201	0.179048577815201
West Nusa Tenggara	1951	0.118304036551991	0.118304036551991	0.118304036551991
East Nusa Tenggara	1951	0.146286267556128	0.146286267556128	0.146286267556128
West Kalimantan	1951	0.151895976631136	0.151895976631136	0.151895976631136
Central Kalimantan	1951	0.218407206652864	0.218407206652864	0.218407206652864
South Kalimantan	1951	0.184374053465027	0.184374053465027	0.184374053465027
East Kalimantan	1951	0.248604599829793	0.248604599829793	0.248604599829793
North Sulawesi	1951	0.212361178849014	0.212361178849014	0.212361178849014
Central Sulawesi	1951	0.169008852185863	0.169008852185863	0.169008852185863
South Sulawesi	1951	0.159981087633738	0.159981087633738	0.159981087633738
Southeast Sulawesi	1951	0.134828473352587	0.134828473352587	0.134828473352587
Gorontalo	1951	0.17574695868734	0.17574695868734	0.17574695868734
West Sulawesi	1951	0.184921219412134	0.184921219412134	0.184921219412134
Maluku	1951	0.242529076757082	0.242529076757082	0.242529076757082
North Maluku	1951	0.164301790212181	0.164301790212181	0.164301790212181
West Papua	1951	0.252797984530405	0.252797984530405	0.252797984530405
Papua	1951	0.256083698794488	0.256083698794488	0.256083698794488
England	1951	0.593260536465998	0.593260536465998	0.593260536465998
Acre	1951	0.154310928144608	0.154310928144608	0.154310928144608
Alagoas	1951	0.156249385733385	0.156249385733385	0.156249385733385
Amazonas	1951	0.213885705450244	0.213885705450244	0.213885705450244
Amapá	1951	0.212360630043058	0.212360630043058	0.212360630043058
Bahia	1951	0.176832645009576	0.176832645009576	0.176832645009576
Ceará	1951	0.178089793951607	0.178089793951607	0.178089793951607
Distrito Federal	1951	0.350054624649222	0.350054624649222	0.350054624649222
Espírito Santo	1951	0.222412378700902	0.222412378700902	0.222412378700902
Goiás	1951	0.172982166297799	0.172982166297799	0.172982166297799
Maranh?o	1951	0.138063146982018	0.138063146982018	0.138063146982018
Minas Gerais	1951	0.237611623061885	0.237611623061885	0.237611623061885
Mato Grosso do Sul	1951	0.234093678822778	0.234093678822778	0.234093678822778
Mato Grosso	1951	0.244483416336992	0.244483416336992	0.244483416336992
Pará	1951	0.205214403039203	0.205214403039203	0.205214403039203
Paraíba	1951	0.179625498730312	0.179625498730312	0.179625498730312
Paraná	1951	0.251605076286909	0.251605076286909	0.251605076286909
Pernambuco	1951	0.185749262013527	0.185749262013527	0.185749262013527
Piaui	1951	0.135363266073232	0.135363266073232	0.135363266073232
Rio de Janeiro	1951	0.35373729352955	0.35373729352955	0.35373729352955
Rio Grande do Norte	1951	0.182572172358076	0.182572172358076	0.182572172358076
Rond?nia	1951	0.216175120084934	0.216175120084934	0.216175120084934
Roraima	1951	0.237384279276789	0.237384279276789	0.237384279276789
Rio Grande do Sul	1951	0.308020699602606	0.308020699602606	0.308020699602606
Santa Catarina	1951	0.277454765752978	0.277454765752978	0.277454765752978
Sergipe	1951	0.183860958240549	0.183860958240549	0.183860958240549
S?o Paulo	1951	0.330158203465198	0.330158203465198	0.330158203465198
Tocantins	1951	0.158626572473635	0.158626572473635	0.158626572473635
Andhra Pradesh	1951	0.176414332814449	0.176414332814449	0.176414332814449
Arunachal Pradesh	1951	0.138781446825361	0.138781446825361	0.138781446825361
Assam	1951	0.173540424878633	0.173540424878633	0.173540424878633
Bihar	1951	0.158716097126946	0.158716097126946	0.158716097126946
Chhattisgarh	1951	0.148404918581519	0.148404918581519	0.148404918581519
Delhi	1951	0.337578216188439	0.337578216188439	0.337578216188439
Goa	1951	0.306778291687185	0.306778291687185	0.306778291687185
Gujarat	1951	0.208224200627778	0.208224200627778	0.208224200627778
Haryana	1951	0.188311868133454	0.188311868133454	0.188311868133454
Himachal Pradesh	1951	0.166621869797822	0.166621869797822	0.166621869797822
Jammu & Kashmir and Ladakh	1951	0.183180904967605	0.183180904967605	0.183180904967605
Jharkhand	1951	0.159139047100309	0.159139047100309	0.159139047100309
Karnataka	1951	0.205983178217657	0.205983178217657	0.205983178217657
Kerala	1951	0.250939641238388	0.250939641238388	0.250939641238388
Madhya Pradesh	1951	0.141971969060119	0.141971969060119	0.141971969060119
Maharashtra	1951	0.240566917219844	0.240566917219844	0.240566917219844
Manipur	1951	0.175131955132155	0.175131955132155	0.175131955132155
Meghalaya	1951	0.189453419426894	0.189453419426894	0.189453419426894
Mizoram	1951	0.210331801642935	0.210331801642935	0.210331801642935
Nagaland	1951	0.199812121197679	0.199812121197679	0.199812121197679
Odisha	1951	0.15408193656662	0.15408193656662	0.15408193656662
Punjab	1951	0.229485480330732	0.229485480330732	0.229485480330732
Rajasthan	1951	0.152986790811962	0.152986790811962	0.152986790811962
Sikkim	1951	0.154455980900714	0.154455980900714	0.154455980900714
Tamil Nadu	1951	0.217685921084211	0.217685921084211	0.217685921084211
Telangana	1951	0.147328071688527	0.147328071688527	0.147328071688527
Tripura	1951	0.205140221257014	0.205140221257014	0.205140221257014
Uttar Pradesh	1951	0.160241105659225	0.160241105659225	0.160241105659225
Uttarakhand	1951	0.202669734851165	0.202669734851165	0.202669734851165
West Bengal	1951	0.216719330561477	0.216719330561477	0.216719330561477
Oslo	1951	0.712867244871915	0.712867244871915	0.712867244871915
Rogaland	1951	0.648720470143658	0.648720470143658	0.648720470143658
M?re og Romsdal	1951	0.632640461167891	0.632640461167891	0.632640461167891
Nordland	1951	0.619941673847221	0.619941673847221	0.619941673847221
Sweden except Stockholm	1951	0.630407685109804	0.630407685109804	0.630407685109804
Stockholm	1951	0.70882597839862	0.70882597839862	0.70882597839862
Hokkaidō	1951	0.550169419624953	0.550169419624953	0.550169419624953
Aomori	1951	0.4948662312449	0.4948662312449	0.4948662312449
Iwate	1951	0.49650233610283	0.49650233610283	0.49650233610283
Miyagi	1951	0.533597850314538	0.533597850314538	0.533597850314538
Akita	1951	0.519505780485855	0.519505780485855	0.519505780485855
Yamagata	1951	0.509669011715451	0.509669011715451	0.509669011715451
Fukushima	1951	0.510719170204105	0.510719170204105	0.510719170204105
Ibaraki	1951	0.520071771699237	0.520071771699237	0.520071771699237
Tochigi	1951	0.534369567638447	0.534369567638447	0.534369567638447
Gunma	1951	0.52807712062396	0.52807712062396	0.52807712062396
Saitama	1951	0.53493999425905	0.53493999425905	0.53493999425905
Chiba	1951	0.537481508888805	0.537481508888805	0.537481508888805
Tōkyō	1951	0.657170419018085	0.657170419018085	0.657170419018085
Kanagawa	1951	0.59617901395546	0.59617901395546	0.59617901395546
Niigata	1951	0.521080582977986	0.521080582977986	0.521080582977986
Toyama	1951	0.538873187820967	0.538873187820967	0.538873187820967
Ishikawa	1951	0.52823033057386	0.52823033057386	0.52823033057386
Fukui	1951	0.525882596014627	0.525882596014627	0.525882596014627
Yamanashi	1951	0.531818886837484	0.531818886837484	0.531818886837484
Nagano	1951	0.535788104857797	0.535788104857797	0.535788104857797
Gifu	1951	0.536039609476955	0.536039609476955	0.536039609476955
Shizuoka	1951	0.548652874783097	0.548652874783097	0.548652874783097
Aichi	1951	0.56477098694986	0.56477098694986	0.56477098694986
Mie	1951	0.536486389543496	0.536486389543496	0.536486389543496
Shiga	1951	0.551720388880407	0.551720388880407	0.551720388880407
Kyōto	1951	0.578917444534945	0.578917444534945	0.578917444534945
ōsaka	1951	0.591425422732397	0.591425422732397	0.591425422732397
Hyōgo	1951	0.581574739773624	0.581574739773624	0.581574739773624
Nara	1951	0.563709355522984	0.563709355522984	0.563709355522984
Wakayama	1951	0.543826233271193	0.543826233271193	0.543826233271193
Tottori	1951	0.530770343540204	0.530770343540204	0.530770343540204
Shimane	1951	0.509207947735468	0.509207947735468	0.509207947735468
Okayama	1951	0.538168054851047	0.538168054851047	0.538168054851047
Hiroshima	1951	0.553062975067661	0.553062975067661	0.553062975067661
Yamaguchi	1951	0.554947111741583	0.554947111741583	0.554947111741583
Tokushima	1951	0.516317834726568	0.516317834726568	0.516317834726568
Kagawa	1951	0.540886379721713	0.540886379721713	0.540886379721713
Ehime	1951	0.533594400071347	0.533594400071347	0.533594400071347
Kōchi	1951	0.509860420529629	0.509860420529629	0.509860420529629
Fukuoka	1951	0.567964406191269	0.567964406191269	0.567964406191269
Saga	1951	0.523388018480558	0.523388018480558	0.523388018480558
Nagasaki	1951	0.515708978579559	0.515708978579559	0.515708978579559
Kumamoto	1951	0.514122121992021	0.514122121992021	0.514122121992021
ōita	1951	0.529936321468998	0.529936321468998	0.529936321468998
Miyazaki	1951	0.504481341406136	0.504481341406136	0.504481341406136
Kagoshima	1951	0.505498519864245	0.505498519864245	0.505498519864245
Okinawa	1951	0.469564900908144	0.469564900908144	0.469564900908144
Baringo	1951	0.101990575535755	0.101990575535755	0.101990575535755
Bomet	1951	0.0790147406058088	0.0790147406058088	0.0790147406058088
Bungoma	1951	0.0671418047420904	0.0671418047420904	0.0671418047420904
Busia	1951	0.102843847279854	0.102843847279854	0.102843847279854
Elgeyo-Marakwet	1951	0.0772119685147997	0.0772119685147997	0.0772119685147997
Embu	1951	0.134938404225995	0.134938404225995	0.134938404225995
Garissa	1951	0.0621428566087566	0.0621428566087566	0.0621428566087566
Homa Bay	1951	0.0992300061343418	0.0992300061343418	0.0992300061343418
Isiolo	1951	0.0924756433499792	0.0924756433499792	0.0924756433499792
Kajiado	1951	0.087690280503455	0.087690280503455	0.087690280503455
Kakamega	1951	0.0789887124050297	0.0789887124050297	0.0789887124050297
Kericho	1951	0.101110564105657	0.101110564105657	0.101110564105657
Kiambu	1951	0.164955640592747	0.164955640592747	0.164955640592747
Kilifi	1951	0.113881556630331	0.113881556630331	0.113881556630331
Kirinyaga	1951	0.119618369935002	0.119618369935002	0.119618369935002
Kisii	1951	0.0463551380616008	0.0463551380616008	0.0463551380616008
Kisumu	1951	0.104315886454996	0.104315886454996	0.104315886454996
Kitui	1951	0.0879866792811285	0.0879866792811285	0.0879866792811285
Kwale	1951	0.102162839459104	0.102162839459104	0.102162839459104
Laikipia	1951	0.13073617739913	0.13073617739913	0.13073617739913
Lamu	1951	0.10675346751136	0.10675346751136	0.10675346751136
Machakos	1951	0.148793303980141	0.148793303980141	0.148793303980141
Makueni	1951	0.0950526944670568	0.0950526944670568	0.0950526944670568
Mandera	1951	0.062593706162332	0.062593706162332	0.062593706162332
Marsabit	1951	0.0932718601695108	0.0932718601695108	0.0932718601695108
Meru	1951	0.11423202271041	0.11423202271041	0.11423202271041
Migori	1951	0.149208744695361	0.149208744695361	0.149208744695361
Mombasa	1951	0.184416436809113	0.184416436809113	0.184416436809113
Murang'a	1951	0.143844710492762	0.143844710492762	0.143844710492762
Nairobi	1951	0.256539571464798	0.256539571464798	0.256539571464798
Nakuru	1951	0.140743253377726	0.140743253377726	0.140743253377726
Nandi	1951	0.0942520690658111	0.0942520690658111	0.0942520690658111
Narok	1951	0.0923017320370588	0.0923017320370588	0.0923017320370588
Nyamira	1951	0.130801690369412	0.130801690369412	0.130801690369412
Nyandarua	1951	0.0882659533991647	0.0882659533991647	0.0882659533991647
Nyeri	1951	0.149808874120697	0.149808874120697	0.149808874120697
Samburu	1951	0.0971126588583202	0.0971126588583202	0.0971126588583202
Siaya	1951	0.0634311977353603	0.0634311977353603	0.0634311977353603
Taita Taveta	1951	0.128346892518367	0.128346892518367	0.128346892518367
Tana River	1951	0.0718845162803223	0.0718845162803223	0.0718845162803223
Tharaka Nithi	1951	0.107096280704271	0.107096280704271	0.107096280704271
Trans Nzoia	1951	0.144284421147556	0.144284421147556	0.144284421147556
Turkana	1951	0.0749465240828666	0.0749465240828666	0.0749465240828666
Uasin Gishu	1951	0.131602896046295	0.131602896046295	0.131602896046295
Vihiga	1951	0.131205853916246	0.131205853916246	0.131205853916246
Wajir	1951	0.0647203144170564	0.0647203144170564	0.0647203144170564
West Pokot	1951	0.0820367319592773	0.0820367319592773	0.0820367319592773
Other Union Territories	1951	0.258202985771557	0.258202985771557	0.258202985771557
Darlington	1951	0.571973840186207	0.571973840186207	0.571973840186207
Northumberland	1951	0.562429775071666	0.562429775071666	0.562429775071666
Stockton-on-Tees	1951	0.568529486750308	0.568529486750308	0.568529486750308
Newcastle upon Tyne	1951	0.594883290619498	0.594883290619498	0.594883290619498
North Tyneside	1951	0.564583164442016	0.564583164442016	0.564583164442016
Redcar and Cleveland	1951	0.534459515239235	0.534459515239235	0.534459515239235
County Durham	1951	0.548156721352234	0.548156721352234	0.548156721352234
Gateshead	1951	0.556342249197168	0.556342249197168	0.556342249197168
Middlesbrough	1951	0.529867793666214	0.529867793666214	0.529867793666214
South Tyneside	1951	0.528694022698672	0.528694022698672	0.528694022698672
Sunderland	1951	0.536700662918433	0.536700662918433	0.536700662918433
Hartlepool	1951	0.528207470825499	0.528207470825499	0.528207470825499
Cheshire East	1951	0.633078813144329	0.633078813144329	0.633078813144329
Stockport	1951	0.606223613817409	0.606223613817409	0.606223613817409
Trafford	1951	0.638406479856461	0.638406479856461	0.638406479856461
Cheshire West and Chester	1951	0.617210607807347	0.617210607807347	0.617210607807347
Sefton	1951	0.572320485219469	0.572320485219469	0.572320485219469
Lancashire	1951	0.581702326858915	0.581702326858915	0.581702326858915
Cumbria	1951	0.580123122341382	0.580123122341382	0.580123122341382
Bolton	1951	0.551498159459351	0.551498159459351	0.551498159459351
Wirral	1951	0.561377789235328	0.561377789235328	0.561377789235328
Bury	1951	0.573560289711727	0.573560289711727	0.573560289711727
St Helens	1951	0.54580274288021	0.54580274288021	0.54580274288021
Warrington	1951	0.611727519911392	0.611727519911392	0.611727519911392
Oldham	1951	0.532618122016775	0.532618122016775	0.532618122016775
Rochdale	1951	0.536517526966367	0.536517526966367	0.536517526966367
Wigan	1951	0.542802983531119	0.542802983531119	0.542802983531119
Halton	1951	0.557972030152216	0.557972030152216	0.557972030152216
Liverpool	1951	0.566617637838037	0.566617637838037	0.566617637838037
Tameside	1951	0.542536645518628	0.542536645518628	0.542536645518628
Salford	1951	0.561158970271518	0.561158970271518	0.561158970271518
Blackburn with Darwen	1951	0.528047049544614	0.528047049544614	0.528047049544614
Knowsley	1951	0.531984931642941	0.531984931642941	0.531984931642941
Blackpool	1951	0.533408725928121	0.533408725928121	0.533408725928121
Manchester	1951	0.588946900669584	0.588946900669584	0.588946900669584
North Yorkshire	1951	0.593529310386327	0.593529310386327	0.593529310386327
East Riding of Yorkshire	1951	0.577272152755817	0.577272152755817	0.577272152755817
York	1951	0.631353387977368	0.631353387977368	0.631353387977368
North East Lincolnshire	1951	0.523484042111101	0.523484042111101	0.523484042111101
Calderdale	1951	0.558987742741804	0.558987742741804	0.558987742741804
North Lincolnshire	1951	0.569355380391666	0.569355380391666	0.569355380391666
Bradford	1951	0.530715588301039	0.530715588301039	0.530715588301039
Kirklees	1951	0.548399005107804	0.548399005107804	0.548399005107804
Leeds	1951	0.591126163143384	0.591126163143384	0.591126163143384
Sheffield	1951	0.585599697727731	0.585599697727731	0.585599697727731
Wakefield	1951	0.535335450388763	0.535335450388763	0.535335450388763
Rotherham	1951	0.530606955650075	0.530606955650075	0.530606955650075
Doncaster	1951	0.522528015601366	0.522528015601366	0.522528015601366
Kingston upon Hull, City of	1951	0.521937957872448	0.521937957872448	0.521937957872448
Barnsley	1951	0.519431613116374	0.519431613116374	0.519431613116374
Northamptonshire	1951	0.570151865171682	0.570151865171682	0.570151865171682
Leicestershire	1951	0.593007964462157	0.593007964462157	0.593007964462157
Lincolnshire	1951	0.558497726754949	0.558497726754949	0.558497726754949
Rutland	1951	0.608985173308219	0.608985173308219	0.608985173308219
Derby	1951	0.566087361897164	0.566087361897164	0.566087361897164
Derbyshire	1951	0.55844901613378	0.55844901613378	0.55844901613378
Nottinghamshire	1951	0.558813127545203	0.558813127545203	0.558813127545203
Nottingham	1951	0.570142966688916	0.570142966688916	0.570142966688916
Leicester	1951	0.532823659734789	0.532823659734789	0.532823659734789
Warwickshire	1951	0.601008826503096	0.601008826503096	0.601008826503096
Herefordshire, County of	1951	0.573500126370965	0.573500126370965	0.573500126370965
Solihull	1951	0.61289370069136	0.61289370069136	0.61289370069136
Shropshire	1951	0.579543236864329	0.579543236864329	0.579543236864329
Worcestershire	1951	0.579047102299383	0.579047102299383	0.579047102299383
Staffordshire	1951	0.569756093340305	0.569756093340305	0.569756093340305
Dudley	1951	0.54453796638624	0.54453796638624	0.54453796638624
Coventry	1951	0.574572959662319	0.574572959662319	0.574572959662319
Telford and Wrekin	1951	0.561094742015429	0.561094742015429	0.561094742015429
Stoke-on-Trent	1951	0.521813587484605	0.521813587484605	0.521813587484605
Walsall	1951	0.525929177147887	0.525929177147887	0.525929177147887
Wolverhampton	1951	0.536753627599614	0.536753627599614	0.536753627599614
Birmingham	1951	0.549967643706572	0.549967643706572	0.549967643706572
Sandwell	1951	0.516888886632165	0.516888886632165	0.516888886632165
Bedford	1951	0.591253560996626	0.591253560996626	0.591253560996626
Central Bedfordshire	1951	0.589583238341549	0.589583238341549	0.589583238341549
Suffolk	1951	0.571356647809266	0.571356647809266	0.571356647809266
Hertfordshire	1951	0.631275253518013	0.631275253518013	0.631275253518013
Essex	1951	0.576110293628435	0.576110293628435	0.576110293628435
Cambridgeshire	1951	0.626030203288648	0.626030203288648	0.626030203288648
Thurrock	1951	0.559653899413846	0.559653899413846	0.559653899413846
Norfolk	1951	0.569197143595856	0.569197143595856	0.569197143595856
Southend-on-Sea	1951	0.550014630294133	0.550014630294133	0.550014630294133
Peterborough	1951	0.562452836045385	0.562452836045385	0.562452836045385
Luton	1951	0.557067366116044	0.557067366116044	0.557067366116044
Richmond upon Thames	1951	0.681019841145685	0.681019841145685	0.681019841145685
Kensington and Chelsea	1951	0.710369025735143	0.710369025735143	0.710369025735143
Barnet	1951	0.613402474480528	0.613402474480528	0.613402474480528
Westminster	1951	0.738203163198498	0.738203163198498	0.738203163198498
Bromley	1951	0.603541063598542	0.603541063598542	0.603541063598542
Bexley	1951	0.557587389714707	0.557587389714707	0.557587389714707
Redbridge	1951	0.574629448413009	0.574629448413009	0.574629448413009
Merton	1951	0.603383893210447	0.603383893210447	0.603383893210447
Brent	1951	0.574012570546265	0.574012570546265	0.574012570546265
Hillingdon	1951	0.612836613458519	0.612836613458519	0.612836613458519
Havering	1951	0.553404572369708	0.553404572369708	0.553404572369708
Kingston upon Thames	1951	0.648744080763197	0.648744080763197	0.648744080763197
Sutton	1951	0.576170517820828	0.576170517820828	0.576170517820828
Harrow	1951	0.597774039797029	0.597774039797029	0.597774039797029
Enfield	1951	0.563527047669853	0.563527047669853	0.563527047669853
Croydon	1951	0.574833153968638	0.574833153968638	0.574833153968638
Hammersmith and Fulham	1951	0.662634010371582	0.662634010371582	0.662634010371582
Ealing	1951	0.596156443385281	0.596156443385281	0.596156443385281
Greenwich	1951	0.550754543798322	0.550754543798322	0.550754543798322
Wandsworth	1951	0.639015388194511	0.639015388194511	0.639015388194511
Waltham Forest	1951	0.538389247920326	0.538389247920326	0.538389247920326
Camden	1951	0.720301932698192	0.720301932698192	0.720301932698192
Lambeth	1951	0.604986688324849	0.604986688324849	0.604986688324849
Lewisham	1951	0.561968075926165	0.561968075926165	0.561968075926165
Hounslow	1951	0.600397154840472	0.600397154840472	0.600397154840472
Southwark	1951	0.615909574512837	0.615909574512837	0.615909574512837
Newham	1951	0.52315562966513	0.52315562966513	0.52315562966513
Barking and Dagenham	1951	0.516942695747592	0.516942695747592	0.516942695747592
Haringey	1951	0.584034001171208	0.584034001171208	0.584034001171208
Hackney	1951	0.627362064927084	0.627362064927084	0.627362064927084
Islington	1951	0.656899024718406	0.656899024718406	0.656899024718406
Tower Hamlets	1951	0.584941978364651	0.584941978364651	0.584941978364651
Wokingham	1951	0.702422653261376	0.702422653261376	0.702422653261376
Buckinghamshire	1951	0.66890317618085	0.66890317618085	0.66890317618085
Surrey	1951	0.683217746266202	0.683217746266202	0.683217746266202
Windsor and Maidenhead	1951	0.691119228587162	0.691119228587162	0.691119228587162
West Berkshire	1951	0.672622465990376	0.672622465990376	0.672622465990376
Hampshire	1951	0.637549839617504	0.637549839617504	0.637549839617504
Bracknell Forest	1951	0.654119865485193	0.654119865485193	0.654119865485193
West Sussex	1951	0.625544547281912	0.625544547281912	0.625544547281912
Oxfordshire	1951	0.668928635015884	0.668928635015884	0.668928635015884
Reading	1951	0.66841538689206	0.66841538689206	0.66841538689206
Kent	1951	0.60335002674055	0.60335002674055	0.60335002674055
Brighton and Hove	1951	0.653497192254653	0.653497192254653	0.653497192254653
Medway	1951	0.571449982138338	0.571449982138338	0.571449982138338
East Sussex	1951	0.594859775595305	0.594859775595305	0.594859775595305
Portsmouth	1951	0.614352172722471	0.614352172722471	0.614352172722471
Isle of Wight	1951	0.576220996004209	0.576220996004209	0.576220996004209
Milton Keynes	1951	0.631281762323826	0.631281762323826	0.631281762323826
Southampton	1951	0.620075623299385	0.620075623299385	0.620075623299385
Slough	1951	0.629834378094839	0.629834378094839	0.629834378094839
South Gloucestershire	1951	0.641403454202632	0.641403454202632	0.641403454202632
Dorset	1951	0.610365743312079	0.610365743312079	0.610365743312079
Wiltshire	1951	0.617137594598579	0.617137594598579	0.617137594598579
North Somerset	1951	0.604787038448328	0.604787038448328	0.604787038448328
Devon	1951	0.609793443485569	0.609793443485569	0.609793443485569
Poole	1951	0.619120811447865	0.619120811447865	0.619120811447865
Bath and North East Somerset	1951	0.656242542724544	0.656242542724544	0.656242542724544
Gloucestershire	1951	0.626687850556151	0.626687850556151	0.626687850556151
Somerset	1951	0.597542665284574	0.597542665284574	0.597542665284574
Swindon	1951	0.621895777920938	0.621895777920938	0.621895777920938
Torbay	1951	0.573061367549488	0.573061367549488	0.573061367549488
Bristol, City of	1951	0.642429538330348	0.642429538330348	0.642429538330348
Bournemouth	1951	0.612244065684638	0.612244065684638	0.612244065684638
Cornwall	1951	0.590676801362757	0.590676801362757	0.590676801362757
Plymouth	1951	0.58538692237839	0.58538692237839	0.58538692237839
Tigray	1951	0.0549706181440304	0.0549706181440304	0.0549706181440304
Afar	1951	0.037787707407539	0.037787707407539	0.037787707407539
Amhara	1951	0.0378174962344633	0.0378174962344633	0.0378174962344633
Oromia	1951	0.045305914401795	0.045305914401795	0.045305914401795
Somali	1951	0.037429024713895	0.037429024713895	0.037429024713895
Benishangul-Gumuz	1951	0.0314636465808878	0.0314636465808878	0.0314636465808878
Southern Nations, Nationalities, and Peoples with Sidama and South West Regions	1951	0.0445980005057421	0.0445980005057421	0.0445980005057421
Harari	1951	0.13455932488232	0.13455932488232	0.13455932488232
Gambella	1951	0.0623070197401448	0.0623070197401448	0.0623070197401448
Addis Ababa	1951	0.197987138197336	0.197987138197336	0.197987138197336
Dire Dawa	1951	0.135417353753151	0.135417353753151	0.135417353753151
Alborz	1951	0.230879348725102	0.230879348725102	0.230879348725102
Ardebil	1951	0.122033133606283	0.122033133606283	0.122033133606283
East Azarbayejan	1951	0.159309850625087	0.159309850625087	0.159309850625087
West Azarbayejan	1951	0.140011245922555	0.140011245922555	0.140011245922555
Bushehr	1951	0.166166959806321	0.166166959806321	0.166166959806321
Chahar Mahaal and Bakhtiari	1951	0.144082784750384	0.144082784750384	0.144082784750384
Fars	1951	0.181606336588528	0.181606336588528	0.181606336588528
Gilan	1951	0.175333750353612	0.175333750353612	0.175333750353612
Golestan	1951	0.133241017974456	0.133241017974456	0.133241017974456
Hamadan	1951	0.139543621998067	0.139543621998067	0.139543621998067
Hormozgan	1951	0.120265509047512	0.120265509047512	0.120265509047512
Ilam	1951	0.11895360950247	0.11895360950247	0.11895360950247
Isfahan	1951	0.192682170190023	0.192682170190023	0.192682170190023
Kerman	1951	0.149955517366502	0.149955517366502	0.149955517366502
Kermanshah	1951	0.143639914338625	0.143639914338625	0.143639914338625
North Khorasan	1951	0.138046055998729	0.138046055998729	0.138046055998729
Khorasan-e-Razavi	1951	0.156340911546286	0.156340911546286	0.156340911546286
South Khorasan	1951	0.131779003851668	0.131779003851668	0.131779003851668
Khuzestan	1951	0.13984404321352	0.13984404321352	0.13984404321352
Kohgiluyeh and Boyer-Ahmad	1951	0.120167129459048	0.120167129459048	0.120167129459048
Kurdistan	1951	0.123596005422984	0.123596005422984	0.123596005422984
Lorestan	1951	0.124289478258638	0.124289478258638	0.124289478258638
Markazi	1951	0.156926942563403	0.156926942563403	0.156926942563403
Mazandaran	1951	0.178901106055321	0.178901106055321	0.178901106055321
Qazvin	1951	0.161391798612238	0.161391798612238	0.161391798612238
Qom	1951	0.182372576689169	0.182372576689169	0.182372576689169
Semnan	1951	0.180102785832867	0.180102785832867	0.180102785832867
Sistan and Baluchistan	1951	0.113321585516167	0.113321585516167	0.113321585516167
Tehran	1951	0.309594600915392	0.309594600915392	0.309594600915392
Yazd	1951	0.156714829704815	0.156714829704815	0.156714829704815
Zanjan	1951	0.157278415338824	0.157278415338824	0.157278415338824
Tr?ndelag	1951	0.636756458332352	0.636756458332352	0.636756458332352
Azad Jammu & Kashmir	1951	0.130923181551913	0.130923181551913	0.130923181551913
Balochistan	1951	0.140357818603193	0.140357818603193	0.140357818603193
Gilgit-Baltistan	1951	0.0889031093187145	0.0889031093187145	0.0889031093187145
Islamabad Capital Territory	1951	0.254248951831699	0.254248951831699	0.254248951831699
Khyber Pakhtunkhwa	1951	0.129942146065082	0.129942146065082	0.129942146065082
Punjab	1951	0.156332501687121	0.156332501687121	0.156332501687121
Sindh	1951	0.170694543153403	0.170694543153403	0.170694543153403
Vestland	1951	0.649806830832264	0.649806830832264	0.649806830832264
Agder	1951	0.652836887083643	0.652836887083643	0.652836887083643
Vestfold og Telemark	1951	0.650659369003459	0.650659369003459	0.650659369003459
Innlandet	1951	0.633206368920309	0.633206368920309	0.633206368920309
Viken	1951	0.668604742953671	0.668604742953671	0.668604742953671
Troms og Finnmark	1951	0.619780167719044	0.619780167719044	0.619780167719044
Global	1952	0.374024861364809	0.374024861364809	0.374024861364809
Southeast Asia, East Asia, and Oceania	1952	0.216773457807528	0.216773457807528	0.216773457807528
East Asia	1952	0.208495292493504	0.208495292493504	0.208495292493504
China	1952	0.200374730771091	0.200374730771091	0.200374730771091
Democratic People's Republic of Korea	1952	0.33547269871465	0.33547269871465	0.33547269871465
Taiwan (Province of China)	1952	0.304852350140379	0.304852350140379	0.304852350140379
Southeast Asia	1952	0.230335523198806	0.230335523198806	0.230335523198806
Cambodia	1952	0.192336350533118	0.192336350533118	0.192336350533118
Indonesia	1952	0.203777110460095	0.203777110460095	0.203777110460095
Lao People's Democratic Republic	1952	0.138288059553784	0.138288059553784	0.138288059553784
Malaysia	1952	0.21818809029047	0.21818809029047	0.21818809029047
Maldives	1952	0.201715158715482	0.201715158715482	0.201715158715482
Myanmar	1952	0.145907156265534	0.145907156265534	0.145907156265534
Philippines	1952	0.344903632131882	0.344903632131882	0.344903632131882
Sri Lanka	1952	0.336907935021345	0.336907935021345	0.336907935021345
Thailand	1952	0.241133050285286	0.241133050285286	0.241133050285286
Timor-Leste	1952	0.104507569710918	0.104507569710918	0.104507569710918
Viet Nam	1952	0.21489446244434	0.21489446244434	0.21489446244434
Oceania	1952	0.224725014361155	0.224725014361155	0.224725014361155
Fiji	1952	0.307037215259431	0.307037215259431	0.307037215259431
Kiribati	1952	0.282162744321941	0.282162744321941	0.282162744321941
Marshall Islands	1952	0.246699586491793	0.246699586491793	0.246699586491793
Micronesia (Federated States of)	1952	0.241737276819569	0.241737276819569	0.241737276819569
Papua New Guinea	1952	0.142236275905379	0.142236275905379	0.142236275905379
Samoa	1952	0.291429947160184	0.291429947160184	0.291429947160184
Solomon Islands	1952	0.172431623175623	0.172431623175623	0.172431623175623
Tonga	1952	0.276006424232187	0.276006424232187	0.276006424232187
Vanuatu	1952	0.201204136540731	0.201204136540731	0.201204136540731
Central Europe, Eastern Europe, and Central Asia	1952	0.533114927873153	0.533114927873153	0.533114927873153
Central Asia	1952	0.43824694674373	0.43824694674373	0.43824694674373
Armenia	1952	0.455654446529826	0.455654446529826	0.455654446529826
Azerbaijan	1952	0.417118484510579	0.417118484510579	0.417118484510579
Georgia	1952	0.558398407290212	0.558398407290212	0.558398407290212
Kazakhstan	1952	0.454095150571112	0.454095150571112	0.454095150571112
Kyrgyzstan	1952	0.444678606281787	0.444678606281787	0.444678606281787
Mongolia	1952	0.311112812267562	0.311112812267562	0.311112812267562
Tajikistan	1952	0.319118283010632	0.319118283010632	0.319118283010632
Turkmenistan	1952	0.429594950271767	0.429594950271767	0.429594950271767
Uzbekistan	1952	0.376658284507142	0.376658284507142	0.376658284507142
Central Europe	1952	0.489599688092586	0.489599688092586	0.489599688092586
Albania	1952	0.353129026717177	0.353129026717177	0.353129026717177
Bosnia and Herzegovina	1952	0.301110903831056	0.301110903831056	0.301110903831056
Bulgaria	1952	0.478951903990752	0.478951903990752	0.478951903990752
Croatia	1952	0.478223844305338	0.478223844305338	0.478223844305338
Czechia	1952	0.580801048869157	0.580801048869157	0.580801048869157
Hungary	1952	0.507027403941227	0.507027403941227	0.507027403941227
North Macedonia	1952	0.419761690903006	0.419761690903006	0.419761690903006
Montenegro	1952	0.466452019306959	0.466452019306959	0.466452019306959
Poland	1952	0.496412027340164	0.496412027340164	0.496412027340164
Romania	1952	0.42075663419446	0.42075663419446	0.42075663419446
Serbia	1952	0.484454318384764	0.484454318384764	0.484454318384764
Slovakia	1952	0.530676899926381	0.530676899926381	0.530676899926381
Slovenia	1952	0.568758718422025	0.568758718422025	0.568758718422025
Eastern Europe	1952	0.562886232422877	0.562886232422877	0.562886232422877
Belarus	1952	0.495503232659969	0.495503232659969	0.495503232659969
Estonia	1952	0.57063201791125	0.57063201791125	0.57063201791125
Latvia	1952	0.579417859169046	0.579417859169046	0.579417859169046
Lithuania	1952	0.519538802598355	0.519538802598355	0.519538802598355
Republic of Moldova	1952	0.476129036449072	0.476129036449072	0.476129036449072
Russian Federation	1952	0.567377134045442	0.567377134045442	0.567377134045442
Ukraine	1952	0.560524555114717	0.560524555114717	0.560524555114717
High-income	1952	0.590418687464893	0.590418687464893	0.590418687464893
High-income Asia Pacific	1952	0.523797484923796	0.523797484923796	0.523797484923796
Brunei Darussalam	1952	0.372549891710449	0.372549891710449	0.372549891710449
Japan	1952	0.563978184845173	0.563978184845173	0.563978184845173
Republic of Korea	1952	0.30877131423403	0.30877131423403	0.30877131423403
Singapore	1952	0.309000754490723	0.309000754490723	0.309000754490723
Australasia	1952	0.564216631617123	0.564216631617123	0.564216631617123
Australia	1952	0.554132352693917	0.554132352693917	0.554132352693917
New Zealand	1952	0.598681682698043	0.598681682698043	0.598681682698043
Western Europe	1952	0.588782083965927	0.588782083965927	0.588782083965927
Andorra	1952	0.617280861118957	0.617280861118957	0.617280861118957
Austria	1952	0.605690107100281	0.605690107100281	0.605690107100281
Belgium	1952	0.577168567186339	0.577168567186339	0.577168567186339
Cyprus	1952	0.461172077007294	0.461172077007294	0.461172077007294
Denmark	1952	0.633048055473202	0.633048055473202	0.633048055473202
Finland	1952	0.569593435986398	0.569593435986398	0.569593435986398
France	1952	0.549253909584284	0.549253909584284	0.549253909584284
Germany	1952	0.650650846356874	0.650650846356874	0.650650846356874
Greece	1952	0.516162780744109	0.516162780744109	0.516162780744109
Iceland	1952	0.558867391684591	0.558867391684591	0.558867391684591
Ireland	1952	0.583078409906071	0.583078409906071	0.583078409906071
Israel	1952	0.501822688852997	0.501822688852997	0.501822688852997
Italy	1952	0.534460989622026	0.534460989622026	0.534460989622026
Luxembourg	1952	0.64437896744327	0.64437896744327	0.64437896744327
Malta	1952	0.426136678685594	0.426136678685594	0.426136678685594
Netherlands	1952	0.653474961516691	0.653474961516691	0.653474961516691
Norway	1952	0.652454377392144	0.652454377392144	0.652454377392144
Portugal	1952	0.427600868387609	0.427600868387609	0.427600868387609
Spain	1952	0.446604756591352	0.446604756591352	0.446604756591352
Sweden	1952	0.644020619423296	0.644020619423296	0.644020619423296
Switzerland	1952	0.752691140965472	0.752691140965472	0.752691140965472
United Kingdom	1952	0.592040926814063	0.592040926814063	0.592040926814063
Southern Latin America	1952	0.473956852496463	0.473956852496463	0.473956852496463
Argentina	1952	0.483157905091141	0.483157905091141	0.483157905091141
Chile	1952	0.442526612229342	0.442526612229342	0.442526612229342
Uruguay	1952	0.482161313177422	0.482161313177422	0.482161313177422
High-income North America	1952	0.607941610843566	0.607941610843566	0.607941610843566
Canada	1952	0.613632384165689	0.613632384165689	0.613632384165689
United States of America	1952	0.606821297552999	0.606821297552999	0.606821297552999
Latin America and Caribbean	1952	0.284564057771474	0.284564057771474	0.284564057771474
Caribbean	1952	0.331208180821279	0.331208180821279	0.331208180821279
Antigua and Barbuda	1952	0.334452880457714	0.334452880457714	0.334452880457714
Bahamas	1952	0.478718820990141	0.478718820990141	0.478718820990141
Barbados	1952	0.404636180981661	0.404636180981661	0.404636180981661
Belize	1952	0.286628059401618	0.286628059401618	0.286628059401618
Cuba	1952	0.388092490018175	0.388092490018175	0.388092490018175
Dominica	1952	0.3758440086124	0.3758440086124	0.3758440086124
Dominican Republic	1952	0.17046018840856	0.17046018840856	0.17046018840856
Grenada	1952	0.225890494535945	0.225890494535945	0.225890494535945
Guyana	1952	0.290237875025631	0.290237875025631	0.290237875025631
Haiti	1952	0.188646270126285	0.188646270126285	0.188646270126285
Jamaica	1952	0.362993937515915	0.362993937515915	0.362993937515915
Saint Lucia	1952	0.280052405590246	0.280052405590246	0.280052405590246
Saint Vincent and the Grenadines	1952	0.24110115827094	0.24110115827094	0.24110115827094
Suriname	1952	0.282033979698055	0.282033979698055	0.282033979698055
Trinidad and Tobago	1952	0.394695284140392	0.394695284140392	0.394695284140392
Andean Latin America	1952	0.296869181401939	0.296869181401939	0.296869181401939
Bolivia (Plurinational State of)	1952	0.253836369029754	0.253836369029754	0.253836369029754
Ecuador	1952	0.328740616965968	0.328740616965968	0.328740616965968
Peru	1952	0.296501383302248	0.296501383302248	0.296501383302248
Central Latin America	1952	0.283462847018585	0.283462847018585	0.283462847018585
Colombia	1952	0.277093840210932	0.277093840210932	0.277093840210932
Costa Rica	1952	0.316046172152591	0.316046172152591	0.316046172152591
El Salvador	1952	0.19638195278281	0.19638195278281	0.19638195278281
Guatemala	1952	0.207577319021031	0.207577319021031	0.207577319021031
Honduras	1952	0.187212882658882	0.187212882658882	0.187212882658882
Mexico	1952	0.292508665323199	0.292508665323199	0.292508665323199
Nicaragua	1952	0.216432216190993	0.216432216190993	0.216432216190993
Panama	1952	0.321301650483937	0.321301650483937	0.321301650483937
Venezuela (Bolivarian Republic of)	1952	0.32399740522732	0.32399740522732	0.32399740522732
Tropical Latin America	1952	0.261502900630407	0.261502900630407	0.261502900630407
Brazil	1952	0.260498007661677	0.260498007661677	0.260498007661677
Paraguay	1952	0.300412269796463	0.300412269796463	0.300412269796463
North Africa and Middle East	1952	0.200315434082878	0.200315434082878	0.200315434082878
North Africa and Middle East	1952	0.200315434082878	0.200315434082878	0.200315434082878
Algeria	1952	0.147796192938458	0.147796192938458	0.147796192938458
Bahrain	1952	0.242760404935749	0.242760404935749	0.242760404935749
Egypt	1952	0.236534617457965	0.236534617457965	0.236534617457965
Iran (Islamic Republic of)	1952	0.174925009825968	0.174925009825968	0.174925009825968
Iraq	1952	0.166522960619661	0.166522960619661	0.166522960619661
Jordan	1952	0.126453273695183	0.126453273695183	0.126453273695183
Kuwait	1952	0.334686446669444	0.334686446669444	0.334686446669444
Lebanon	1952	0.293800128630944	0.293800128630944	0.293800128630944
Libya	1952	0.160329916236234	0.160329916236234	0.160329916236234
Morocco	1952	0.105028714744659	0.105028714744659	0.105028714744659
Palestine	1952	0.150400151415185	0.150400151415185	0.150400151415185
Oman	1952	0.136008212112304	0.136008212112304	0.136008212112304
Qatar	1952	0.276727830123154	0.276727830123154	0.276727830123154
Saudi Arabia	1952	0.214391015507804	0.214391015507804	0.214391015507804
Syrian Arab Republic	1952	0.164852905383454	0.164852905383454	0.164852905383454
Tunisia	1952	0.160512228246691	0.160512228246691	0.160512228246691
Türkiye	1952	0.252623377968778	0.252623377968778	0.252623377968778
United Arab Emirates	1952	0.205763353890211	0.205763353890211	0.205763353890211
Yemen	1952	0.0873751294225264	0.0873751294225264	0.0873751294225264
South Asia	1952	0.186537670811886	0.186537670811886	0.186537670811886
South Asia	1952	0.186537670811886	0.186537670811886	0.186537670811886
Afghanistan	1952	0.116750475152082	0.116750475152082	0.116750475152082
Bangladesh	1952	0.104586368663956	0.104586368663956	0.104586368663956
Bhutan	1952	0.0556605245032263	0.0556605245032263	0.0556605245032263
India	1952	0.194669825951928	0.194669825951928	0.194669825951928
Nepal	1952	0.101698190100232	0.101698190100232	0.101698190100232
Pakistan	1952	0.156256217412517	0.156256217412517	0.156256217412517
Sub-Saharan Africa	1952	0.161379893178283	0.161379893178283	0.161379893178283
Central Sub-Saharan Africa	1952	0.158438311403968	0.158438311403968	0.158438311403968
Angola	1952	0.137398723564917	0.137398723564917	0.137398723564917
Central African Republic	1952	0.110238950251145	0.110238950251145	0.110238950251145
Congo	1952	0.172224515716913	0.172224515716913	0.172224515716913
Democratic Republic of the Congo	1952	0.155475122208846	0.155475122208846	0.155475122208846
Equatorial Guinea	1952	0.110560526013608	0.110560526013608	0.110560526013608
Gabon	1952	0.170160212808112	0.170160212808112	0.170160212808112
Eastern Sub-Saharan Africa	1952	0.12181158842627	0.12181158842627	0.12181158842627
Burundi	1952	0.1046961790688	0.1046961790688	0.1046961790688
Comoros	1952	0.124358189686989	0.124358189686989	0.124358189686989
Djibouti	1952	0.169891563152429	0.169891563152429	0.169891563152429
Eritrea	1952	0.0720887974323859	0.0720887974323859	0.0720887974323859
Ethiopia	1952	0.0595186041995421	0.0595186041995421	0.0595186041995421
Kenya	1952	0.129201313310279	0.129201313310279	0.129201313310279
Madagascar	1952	0.141163877923153	0.141163877923153	0.141163877923153
Malawi	1952	0.141625048497899	0.141625048497899	0.141625048497899
Mauritius	1952	0.304094441027997	0.304094441027997	0.304094441027997
Mozambique	1952	0.0955467982123661	0.0955467982123661	0.0955467982123661
Rwanda	1952	0.130969476878403	0.130969476878403	0.130969476878403
Seychelles	1952	0.375293215247367	0.375293215247367	0.375293215247367
Somalia	1952	0.0615910288973144	0.0615910288973144	0.0615910288973144
United Republic of Tanzania	1952	0.108547864702877	0.108547864702877	0.108547864702877
Uganda	1952	0.103238493693886	0.103238493693886	0.103238493693886
Zambia	1952	0.138695488963122	0.138695488963122	0.138695488963122
Southern Sub-Saharan Africa	1952	0.300632588257522	0.300632588257522	0.300632588257522
Botswana	1952	0.13942644121645	0.13942644121645	0.13942644121645
Lesotho	1952	0.164078672772235	0.164078672772235	0.164078672772235
Namibia	1952	0.222177190739018	0.222177190739018	0.222177190739018
South Africa	1952	0.331300019177455	0.331300019177455	0.331300019177455
Eswatini	1952	0.14708289169453	0.14708289169453	0.14708289169453
Zimbabwe	1952	0.187040187426201	0.187040187426201	0.187040187426201
Western Sub-Saharan Africa	1952	0.144290465365109	0.144290465365109	0.144290465365109
Benin	1952	0.110064543291216	0.110064543291216	0.110064543291216
Burkina Faso	1952	0.0568747780353816	0.0568747780353816	0.0568747780353816
Cameroon	1952	0.140571920742037	0.140571920742037	0.140571920742037
Cabo Verde	1952	0.135061297488715	0.135061297488715	0.135061297488715
Chad	1952	0.0591431176420153	0.0591431176420153	0.0591431176420153
C?te d'Ivoire	1952	0.120496059023881	0.120496059023881	0.120496059023881
Gambia	1952	0.123070245365257	0.123070245365257	0.123070245365257
Ghana	1952	0.24704337569152	0.24704337569152	0.24704337569152
Guinea	1952	0.0622021853230086	0.0622021853230086	0.0622021853230086
Guinea-Bissau	1952	0.0692667808251382	0.0692667808251382	0.0692667808251382
Liberia	1952	0.147303768000009	0.147303768000009	0.147303768000009
Mali	1952	0.0606223774869563	0.0606223774869563	0.0606223774869563
Mauritania	1952	0.18433452037087	0.18433452037087	0.18433452037087
Niger	1952	0.0465069117157111	0.0465069117157111	0.0465069117157111
Nigeria	1952	0.156954708039321	0.156954708039321	0.156954708039321
Sao Tome and Principe	1952	0.182200595693601	0.182200595693601	0.182200595693601
Senegal	1952	0.107080044182513	0.107080044182513	0.107080044182513
Sierra Leone	1952	0.119131591083977	0.119131591083977	0.119131591083977
Togo	1952	0.107489840802639	0.107489840802639	0.107489840802639
American Samoa	1952	0.497417258201208	0.497417258201208	0.497417258201208
Bermuda	1952	0.432121064193502	0.432121064193502	0.432121064193502
Cook Islands	1952	0.343695711384596	0.343695711384596	0.343695711384596
Greenland	1952	0.559958500014293	0.559958500014293	0.559958500014293
Guam	1952	0.550162707710907	0.550162707710907	0.550162707710907
Monaco	1952	0.695490291551777	0.695490291551777	0.695490291551777
Nauru	1952	0.406623898248934	0.406623898248934	0.406623898248934
Niue	1952	0.347744767690774	0.347744767690774	0.347744767690774
Northern Mariana Islands	1952	0.459672033839493	0.459672033839493	0.459672033839493
Palau	1952	0.435174128410293	0.435174128410293	0.435174128410293
Puerto Rico	1952	0.41443437159862	0.41443437159862	0.41443437159862
Saint Kitts and Nevis	1952	0.316769546941655	0.316769546941655	0.316769546941655
San Marino	1952	0.651386011016375	0.651386011016375	0.651386011016375
Tokelau	1952	0.304036251607021	0.304036251607021	0.304036251607021
Tuvalu	1952	0.269840981361958	0.269840981361958	0.269840981361958
United States Virgin Islands	1952	0.44128168822277	0.44128168822277	0.44128168822277
Northern Ireland	1952	0.495716886039012	0.495716886039012	0.495716886039012
Scotland	1952	0.58298082205574	0.58298082205574	0.58298082205574
South Sudan	1952	0.133675350459587	0.133675350459587	0.133675350459587
Eastern Cape	1952	0.275565595250127	0.275565595250127	0.275565595250127
Free State	1952	0.315391516861936	0.315391516861936	0.315391516861936
Gauteng	1952	0.454888297678092	0.454888297678092	0.454888297678092
KwaZulu-Natal	1952	0.282711422931899	0.282711422931899	0.282711422931899
Limpopo	1952	0.199037771518031	0.199037771518031	0.199037771518031
Mpumalanga	1952	0.221738343725599	0.221738343725599	0.221738343725599
North-West	1952	0.277332523622303	0.277332523622303	0.277332523622303
Northern Cape	1952	0.332072216529214	0.332072216529214	0.332072216529214
Western Cape	1952	0.469362249052666	0.469362249052666	0.469362249052666
Sudan	1952	0.139381871630393	0.139381871630393	0.139381871630393
Alabama	1952	0.54307358417212	0.54307358417212	0.54307358417212
Alaska	1952	0.582312224861005	0.582312224861005	0.582312224861005
Arizona	1952	0.596586534324209	0.596586534324209	0.596586534324209
Arkansas	1952	0.536460496287964	0.536460496287964	0.536460496287964
California	1952	0.644024895688847	0.644024895688847	0.644024895688847
Colorado	1952	0.633984834372619	0.633984834372619	0.633984834372619
Connecticut	1952	0.655721374341087	0.655721374341087	0.655721374341087
Delaware	1952	0.622386456245991	0.622386456245991	0.622386456245991
District of Columbia	1952	0.65014840230996	0.65014840230996	0.65014840230996
Florida	1952	0.6027183410061	0.6027183410061	0.6027183410061
Georgia	1952	0.53785079107769	0.53785079107769	0.53785079107769
Hawaii	1952	0.607053008145223	0.607053008145223	0.607053008145223
Idaho	1952	0.586515748732288	0.586515748732288	0.586515748732288
Illinois	1952	0.622586500293046	0.622586500293046	0.622586500293046
Indiana	1952	0.600286334177736	0.600286334177736	0.600286334177736
Iowa	1952	0.617548541051899	0.617548541051899	0.617548541051899
Kansas	1952	0.620147718081821	0.620147718081821	0.620147718081821
Kentucky	1952	0.544706180032221	0.544706180032221	0.544706180032221
Louisiana	1952	0.536018259366259	0.536018259366259	0.536018259366259
Maine	1952	0.585112271183691	0.585112271183691	0.585112271183691
Maryland	1952	0.62759048402342	0.62759048402342	0.62759048402342
Massachusetts	1952	0.662073966227425	0.662073966227425	0.662073966227425
Michigan	1952	0.612057153714948	0.612057153714948	0.612057153714948
Minnesota	1952	0.627786313028754	0.627786313028754	0.627786313028754
Mississippi	1952	0.506653312213626	0.506653312213626	0.506653312213626
Missouri	1952	0.596241905520748	0.596241905520748	0.596241905520748
Montana	1952	0.616290138730985	0.616290138730985	0.616290138730985
Nebraska	1952	0.623679337930615	0.623679337930615	0.623679337930615
Nevada	1952	0.606483526864222	0.606483526864222	0.606483526864222
New Hampshire	1952	0.611224752648295	0.611224752648295	0.611224752648295
New Jersey	1952	0.646616129177988	0.646616129177988	0.646616129177988
New Mexico	1952	0.56613541727972	0.56613541727972	0.56613541727972
New York	1952	0.640648455822246	0.640648455822246	0.640648455822246
North Carolina	1952	0.55457841514335	0.55457841514335	0.55457841514335
North Dakota	1952	0.580356280643159	0.580356280643159	0.580356280643159
Ohio	1952	0.60773975266982	0.60773975266982	0.60773975266982
Oklahoma	1952	0.577536586021277	0.577536586021277	0.577536586021277
Oregon	1952	0.63451611700669	0.63451611700669	0.63451611700669
Pennsylvania	1952	0.622707649059562	0.622707649059562	0.622707649059562
Rhode Island	1952	0.616489046231483	0.616489046231483	0.616489046231483
South Carolina	1952	0.540709662206395	0.540709662206395	0.540709662206395
South Dakota	1952	0.59213729177104	0.59213729177104	0.59213729177104
Tennessee	1952	0.549077479923827	0.549077479923827	0.549077479923827
Texas	1952	0.568435690053115	0.568435690053115	0.568435690053115
Utah	1952	0.617998699618917	0.617998699618917	0.617998699618917
Vermont	1952	0.6022947371294	0.6022947371294	0.6022947371294
Virginia	1952	0.597490133859015	0.597490133859015	0.597490133859015
Washington	1952	0.635987678172133	0.635987678172133	0.635987678172133
West Virginia	1952	0.55979907875302	0.55979907875302	0.55979907875302
Wisconsin	1952	0.623224282666669	0.623224282666669	0.623224282666669
Wyoming	1952	0.600639906711563	0.600639906711563	0.600639906711563
North East England	1952	0.549439771890146	0.549439771890146	0.549439771890146
North West England	1952	0.573379782665485	0.573379782665485	0.573379782665485
Yorkshire and the Humber	1952	0.557267812605067	0.557267812605067	0.557267812605067
East Midlands	1952	0.558136960650793	0.558136960650793	0.558136960650793
West Midlands	1952	0.55292069586197	0.55292069586197	0.55292069586197
East of England	1952	0.586096107838445	0.586096107838445	0.586096107838445
Greater London	1952	0.626893337565126	0.626893337565126	0.626893337565126
South East England	1952	0.641325459969671	0.641325459969671	0.641325459969671
South West England	1952	0.610379378809723	0.610379378809723	0.610379378809723
Wales	1952	0.563583524708675	0.563583524708675	0.563583524708675
Aguascalientes	1952	0.283106226641696	0.283106226641696	0.283106226641696
Baja California	1952	0.3433357826435	0.3433357826435	0.3433357826435
Baja California Sur	1952	0.314490061931521	0.314490061931521	0.314490061931521
Campeche	1952	0.285503353980107	0.285503353980107	0.285503353980107
Coahuila	1952	0.308485407842491	0.308485407842491	0.308485407842491
Colima	1952	0.272698310785072	0.272698310785072	0.272698310785072
Chiapas	1952	0.238068496162056	0.238068496162056	0.238068496162056
Chihuahua	1952	0.305793538470536	0.305793538470536	0.305793538470536
Mexico City	1952	0.407131602132077	0.407131602132077	0.407131602132077
Durango	1952	0.261865251365846	0.261865251365846	0.261865251365846
Guanajuato	1952	0.236863691898566	0.236863691898566	0.236863691898566
Guerrero	1952	0.216973086977546	0.216973086977546	0.216973086977546
Hidalgo	1952	0.239764323615408	0.239764323615408	0.239764323615408
Jalisco	1952	0.296504851217002	0.296504851217002	0.296504851217002
México	1952	0.286477130116043	0.286477130116043	0.286477130116043
Michoacán de Ocampo	1952	0.239299989247691	0.239299989247691	0.239299989247691
Morelos	1952	0.292581638817903	0.292581638817903	0.292581638817903
Nayarit	1952	0.243781806639989	0.243781806639989	0.243781806639989
Nuevo León	1952	0.327791514690255	0.327791514690255	0.327791514690255
Oaxaca	1952	0.235580913115861	0.235580913115861	0.235580913115861
Puebla	1952	0.257746065771788	0.257746065771788	0.257746065771788
Querétaro	1952	0.263544286002452	0.263544286002452	0.263544286002452
Quintana Roo	1952	0.259566307552928	0.259566307552928	0.259566307552928
San Luis Potosí	1952	0.25312415904751	0.25312415904751	0.25312415904751
Sinaloa	1952	0.269813425221345	0.269813425221345	0.269813425221345
Sonora	1952	0.316822423328061	0.316822423328061	0.316822423328061
Tabasco	1952	0.243768154582575	0.243768154582575	0.243768154582575
Tamaulipas	1952	0.311103862656128	0.311103862656128	0.311103862656128
Tlaxcala	1952	0.238404372209006	0.238404372209006	0.238404372209006
Veracruz de Ignacio de la Llave	1952	0.274791106793124	0.274791106793124	0.274791106793124
Yucatán	1952	0.300690594464207	0.300690594464207	0.300690594464207
Zacatecas	1952	0.243458104150824	0.243458104150824	0.243458104150824
Aceh	1952	0.226717067260461	0.226717067260461	0.226717067260461
North Sumatra	1952	0.218185195494774	0.218185195494774	0.218185195494774
West Sumatra	1952	0.213063364541011	0.213063364541011	0.213063364541011
Riau	1952	0.244204011277796	0.244204011277796	0.244204011277796
Jambi	1952	0.180687343861766	0.180687343861766	0.180687343861766
South Sumatra	1952	0.21431567040206	0.21431567040206	0.21431567040206
Bengkulu	1952	0.165744366388537	0.165744366388537	0.165744366388537
Lampung	1952	0.163134479832097	0.163134479832097	0.163134479832097
Bangka-Belitung Islands	1952	0.236517452500395	0.236517452500395	0.236517452500395
Riau Islands	1952	0.319875983829063	0.319875983829063	0.319875983829063
North Kalimantan	1952	0.331936322617262	0.331936322617262	0.331936322617262
Jakarta	1952	0.315467437594106	0.315467437594106	0.315467437594106
West Java	1952	0.202807617878272	0.202807617878272	0.202807617878272
Central Java	1952	0.184365679561447	0.184365679561447	0.184365679561447
Yogyakarta	1952	0.180683538729249	0.180683538729249	0.180683538729249
East Java	1952	0.191863488875424	0.191863488875424	0.191863488875424
Banten	1952	0.229436341389492	0.229436341389492	0.229436341389492
Bali	1952	0.181256114374295	0.181256114374295	0.181256114374295
West Nusa Tenggara	1952	0.120268058140807	0.120268058140807	0.120268058140807
East Nusa Tenggara	1952	0.149639544706444	0.149639544706444	0.149639544706444
West Kalimantan	1952	0.153725400581869	0.153725400581869	0.153725400581869
Central Kalimantan	1952	0.221544712601543	0.221544712601543	0.221544712601543
South Kalimantan	1952	0.186838796910176	0.186838796910176	0.186838796910176
East Kalimantan	1952	0.251653315313031	0.251653315313031	0.251653315313031
North Sulawesi	1952	0.216068135105295	0.216068135105295	0.216068135105295
Central Sulawesi	1952	0.171907215069199	0.171907215069199	0.171907215069199
South Sulawesi	1952	0.162291176815299	0.162291176815299	0.162291176815299
Southeast Sulawesi	1952	0.136747424855082	0.136747424855082	0.136747424855082
Gorontalo	1952	0.179669335358565	0.179669335358565	0.179669335358565
West Sulawesi	1952	0.187913575597268	0.187913575597268	0.187913575597268
Maluku	1952	0.246593908125177	0.246593908125177	0.246593908125177
North Maluku	1952	0.167869255670356	0.167869255670356	0.167869255670356
West Papua	1952	0.255853132037243	0.255853132037243	0.255853132037243
Papua	1952	0.259790741595476	0.259790741595476	0.259790741595476
England	1952	0.594096165035689	0.594096165035689	0.594096165035689
Acre	1952	0.156522630396403	0.156522630396403	0.156522630396403
Alagoas	1952	0.158638714989412	0.158638714989412	0.158638714989412
Amazonas	1952	0.217081783259175	0.217081783259175	0.217081783259175
Amapá	1952	0.215394117979905	0.215394117979905	0.215394117979905
Bahia	1952	0.179386736934427	0.179386736934427	0.179386736934427
Ceará	1952	0.18094574732364	0.18094574732364	0.18094574732364
Distrito Federal	1952	0.3554527816718	0.3554527816718	0.3554527816718
Espírito Santo	1952	0.225923820711355	0.225923820711355	0.225923820711355
Goiás	1952	0.176255582383584	0.176255582383584	0.176255582383584
Maranh?o	1952	0.140042599573593	0.140042599573593	0.140042599573593
Minas Gerais	1952	0.241363686153002	0.241363686153002	0.241363686153002
Mato Grosso do Sul	1952	0.237577286014182	0.237577286014182	0.237577286014182
Mato Grosso	1952	0.247264810106175	0.247264810106175	0.247264810106175
Pará	1952	0.208289949085235	0.208289949085235	0.208289949085235
Paraíba	1952	0.182434721646476	0.182434721646476	0.182434721646476
Paraná	1952	0.25518587465769	0.25518587465769	0.25518587465769
Pernambuco	1952	0.188674533587865	0.188674533587865	0.188674533587865
Piaui	1952	0.137779221745897	0.137779221745897	0.137779221745897
Rio de Janeiro	1952	0.359243556313413	0.359243556313413	0.359243556313413
Rio Grande do Norte	1952	0.185585294610977	0.185585294610977	0.185585294610977
Rond?nia	1952	0.218891432121487	0.218891432121487	0.218891432121487
Roraima	1952	0.240456312171279	0.240456312171279	0.240456312171279
Rio Grande do Sul	1952	0.312952954764121	0.312952954764121	0.312952954764121
Santa Catarina	1952	0.281735751053171	0.281735751053171	0.281735751053171
Sergipe	1952	0.186593638686937	0.186593638686937	0.186593638686937
S?o Paulo	1952	0.334875767961581	0.334875767961581	0.334875767961581
Tocantins	1952	0.160889380069755	0.160889380069755	0.160889380069755
Andhra Pradesh	1952	0.178303550011989	0.178303550011989	0.178303550011989
Arunachal Pradesh	1952	0.140510054554965	0.140510054554965	0.140510054554965
Assam	1952	0.175569894408546	0.175569894408546	0.175569894408546
Bihar	1952	0.160476467752091	0.160476467752091	0.160476467752091
Chhattisgarh	1952	0.15041011351183	0.15041011351183	0.15041011351183
Delhi	1952	0.34145696943545	0.34145696943545	0.34145696943545
Goa	1952	0.310703379655381	0.310703379655381	0.310703379655381
Gujarat	1952	0.21058882981123	0.21058882981123	0.21058882981123
Haryana	1952	0.190968692763048	0.190968692763048	0.190968692763048
Himachal Pradesh	1952	0.168715675501603	0.168715675501603	0.168715675501603
Jammu & Kashmir and Ladakh	1952	0.185565224647331	0.185565224647331	0.185565224647331
Jharkhand	1952	0.161135552685842	0.161135552685842	0.161135552685842
Karnataka	1952	0.208576211418369	0.208576211418369	0.208576211418369
Kerala	1952	0.254398714113946	0.254398714113946	0.254398714113946
Madhya Pradesh	1952	0.143730817307295	0.143730817307295	0.143730817307295
Maharashtra	1952	0.243388508298341	0.243388508298341	0.243388508298341
Manipur	1952	0.177965541174187	0.177965541174187	0.177965541174187
Meghalaya	1952	0.19216699177823	0.19216699177823	0.19216699177823
Mizoram	1952	0.21357310574805	0.21357310574805	0.21357310574805
Nagaland	1952	0.202551186483142	0.202551186483142	0.202551186483142
Odisha	1952	0.155981212095076	0.155981212095076	0.155981212095076
Punjab	1952	0.232757065182484	0.232757065182484	0.232757065182484
Rajasthan	1952	0.15501453706383	0.15501453706383	0.15501453706383
Sikkim	1952	0.156424309459883	0.156424309459883	0.156424309459883
Tamil Nadu	1952	0.220261318485955	0.220261318485955	0.220261318485955
Telangana	1952	0.149613992485904	0.149613992485904	0.149613992485904
Tripura	1952	0.207669697926915	0.207669697926915	0.207669697926915
Uttar Pradesh	1952	0.162203932052325	0.162203932052325	0.162203932052325
Uttarakhand	1952	0.204962537472043	0.204962537472043	0.204962537472043
West Bengal	1952	0.219473276986706	0.219473276986706	0.219473276986706
Oslo	1952	0.71174260675875	0.71174260675875	0.71174260675875
Rogaland	1952	0.645721503713558	0.645721503713558	0.645721503713558
M?re og Romsdal	1952	0.629758681069622	0.629758681069622	0.629758681069622
Nordland	1952	0.616748978063164	0.616748978063164	0.616748978063164
Sweden except Stockholm	1952	0.630993663676523	0.630993663676523	0.630993663676523
Stockholm	1952	0.709702157615396	0.709702157615396	0.709702157615396
Hokkaidō	1952	0.559704846853888	0.559704846853888	0.559704846853888
Aomori	1952	0.504489751089996	0.504489751089996	0.504489751089996
Iwate	1952	0.506109803055892	0.506109803055892	0.506109803055892
Miyagi	1952	0.54252639091197	0.54252639091197	0.54252639091197
Akita	1952	0.528565200120235	0.528565200120235	0.528565200120235
Yamagata	1952	0.51834431273878	0.51834431273878	0.51834431273878
Fukushima	1952	0.519916773944286	0.519916773944286	0.519916773944286
Ibaraki	1952	0.52933433239384	0.52933433239384	0.52933433239384
Tochigi	1952	0.543397272369421	0.543397272369421	0.543397272369421
Gunma	1952	0.53691692322646	0.53691692322646	0.53691692322646
Saitama	1952	0.544091308776559	0.544091308776559	0.544091308776559
Chiba	1952	0.546650155366051	0.546650155366051	0.546650155366051
Tōkyō	1952	0.665085910147915	0.665085910147915	0.665085910147915
Kanagawa	1952	0.60511544018021	0.60511544018021	0.60511544018021
Niigata	1952	0.529846128311201	0.529846128311201	0.529846128311201
Toyama	1952	0.548000953881975	0.548000953881975	0.548000953881975
Ishikawa	1952	0.537561189976674	0.537561189976674	0.537561189976674
Fukui	1952	0.535063008127127	0.535063008127127	0.535063008127127
Yamanashi	1952	0.539981810813234	0.539981810813234	0.539981810813234
Nagano	1952	0.543817018708822	0.543817018708822	0.543817018708822
Gifu	1952	0.545087412553887	0.545087412553887	0.545087412553887
Shizuoka	1952	0.557974366778816	0.557974366778816	0.557974366778816
Aichi	1952	0.574377246535298	0.574377246535298	0.574377246535298
Mie	1952	0.545924786475175	0.545924786475175	0.545924786475175
Shiga	1952	0.560692665912666	0.560692665912666	0.560692665912666
Kyōto	1952	0.587126479180072	0.587126479180072	0.587126479180072
ōsaka	1952	0.600586254419132	0.600586254419132	0.600586254419132
Hyōgo	1952	0.590591432196603	0.590591432196603	0.590591432196603
Nara	1952	0.572414239090654	0.572414239090654	0.572414239090654
Wakayama	1952	0.553570310219371	0.553570310219371	0.553570310219371
Tottori	1952	0.539916411274091	0.539916411274091	0.539916411274091
Shimane	1952	0.518247492339675	0.518247492339675	0.518247492339675
Okayama	1952	0.547457275555683	0.547457275555683	0.547457275555683
Hiroshima	1952	0.562322711843885	0.562322711843885	0.562322711843885
Yamaguchi	1952	0.564126585947932	0.564126585947932	0.564126585947932
Tokushima	1952	0.525611290117525	0.525611290117525	0.525611290117525
Kagawa	1952	0.550149818139102	0.550149818139102	0.550149818139102
Ehime	1952	0.542759758955638	0.542759758955638	0.542759758955638
Kōchi	1952	0.519285559293103	0.519285559293103	0.519285559293103
Fukuoka	1952	0.576856609037444	0.576856609037444	0.576856609037444
Saga	1952	0.532271328347675	0.532271328347675	0.532271328347675
Nagasaki	1952	0.524643481803044	0.524643481803044	0.524643481803044
Kumamoto	1952	0.523283219071214	0.523283219071214	0.523283219071214
ōita	1952	0.538932559762364	0.538932559762364	0.538932559762364
Miyazaki	1952	0.513942709258446	0.513942709258446	0.513942709258446
Kagoshima	1952	0.514104012681595	0.514104012681595	0.514104012681595
Okinawa	1952	0.480855492874132	0.480855492874132	0.480855492874132
Baringo	1952	0.102135150099204	0.102135150099204	0.102135150099204
Bomet	1952	0.0785861511274788	0.0785861511274788	0.0785861511274788
Bungoma	1952	0.0710919029615312	0.0710919029615312	0.0710919029615312
Busia	1952	0.102481119240085	0.102481119240085	0.102481119240085
Elgeyo-Marakwet	1952	0.0764266648569073	0.0764266648569073	0.0764266648569073
Embu	1952	0.136736474737616	0.136736474737616	0.136736474737616
Garissa	1952	0.0628923488798589	0.0628923488798589	0.0628923488798589
Homa Bay	1952	0.10157546871437	0.10157546871437	0.10157546871437
Isiolo	1952	0.0929573096364577	0.0929573096364577	0.0929573096364577
Kajiado	1952	0.0879305929796807	0.0879305929796807	0.0879305929796807
Kakamega	1952	0.0801787638707639	0.0801787638707639	0.0801787638707639
Kericho	1952	0.100495865171112	0.100495865171112	0.100495865171112
Kiambu	1952	0.165224417741638	0.165224417741638	0.165224417741638
Kilifi	1952	0.113740693171277	0.113740693171277	0.113740693171277
Kirinyaga	1952	0.120143600446756	0.120143600446756	0.120143600446756
Kisii	1952	0.046768685404712	0.046768685404712	0.046768685404712
Kisumu	1952	0.106470977142678	0.106470977142678	0.106470977142678
Kitui	1952	0.0888820622084562	0.0888820622084562	0.0888820622084562
Kwale	1952	0.102118909907662	0.102118909907662	0.102118909907662
Laikipia	1952	0.132173608566761	0.132173608566761	0.132173608566761
Lamu	1952	0.106796735758655	0.106796735758655	0.106796735758655
Machakos	1952	0.149201433662116	0.149201433662116	0.149201433662116
Makueni	1952	0.0963972822158849	0.0963972822158849	0.0963972822158849
Mandera	1952	0.063102044446115	0.063102044446115	0.063102044446115
Marsabit	1952	0.0934779060461286	0.0934779060461286	0.0934779060461286
Meru	1952	0.114752270829933	0.114752270829933	0.114752270829933
Migori	1952	0.148947254220781	0.148947254220781	0.148947254220781
Mombasa	1952	0.185751865169804	0.185751865169804	0.185751865169804
Murang'a	1952	0.145308156161176	0.145308156161176	0.145308156161176
Nairobi	1952	0.259709927423767	0.259709927423767	0.259709927423767
Nakuru	1952	0.141108858979328	0.141108858979328	0.141108858979328
Nandi	1952	0.0944094303550021	0.0944094303550021	0.0944094303550021
Narok	1952	0.0915467415990914	0.0915467415990914	0.0915467415990914
Nyamira	1952	0.133030415205293	0.133030415205293	0.133030415205293
Nyandarua	1952	0.0938862554686886	0.0938862554686886	0.0938862554686886
Nyeri	1952	0.151330106023447	0.151330106023447	0.151330106023447
Samburu	1952	0.0969368688120124	0.0969368688120124	0.0969368688120124
Siaya	1952	0.0708338041675403	0.0708338041675403	0.0708338041675403
Taita Taveta	1952	0.128672590974056	0.128672590974056	0.128672590974056
Tana River	1952	0.0721197215913407	0.0721197215913407	0.0721197215913407
Tharaka Nithi	1952	0.108010049082253	0.108010049082253	0.108010049082253
Trans Nzoia	1952	0.14378079233558	0.14378079233558	0.14378079233558
Turkana	1952	0.075145391635705	0.075145391635705	0.075145391635705
Uasin Gishu	1952	0.132832595757617	0.132832595757617	0.132832595757617
[truncated: 50,994 more rows]
