# Supplementary material for: Global, regional, and national burden of early-onset kidney cancer in adolescents and young adults aged 15-39 years from 1990 to 2021: a systematic analysis for the Global Burden of Disease Study 2021
Source: Research Square preprint supplement (doi:10.21203/rs.3.rs-7464519/v1), 2025-10-17
Supplement: Supplementary file 2 [file 0cfce837e7fcf3a833210501.xlsx]

## Sheet: Sheet1
Table S1. Definitions and descriptions of epidemiological metrics used in the study.
	Metric definitions
Measure	Number	Percent	Rate
Incidence	Number of new cases in the population	Proportion of new cases of a particular cause relative to cases from all causes	New cases per 100,000 population
Deaths	Number of deaths in the population	Proportion of deaths for a particular cause relative to deaths from all causes	Deaths per 100,000 population
Disability adjusted life years (DALYs)	Number of DALYs in the population	Proportion of DALYs for a particular cause relative to DALYs for all causes	DALYs per 100,000 population
