# Supplementary material for: Global, regional, and national burden of early-onset kidney cancer in adolescents and young adults aged 15-39 years from 1990 to 2021: a systematic analysis for the Global Burden of Disease Study 2021
Source: Research Square preprint supplement (doi:10.21203/rs.3.rs-7464519/v1), 2025-10-17
Supplement: Supplementary file 3 [file 2d8b34b2fd069d7b46fe1d9a.xlsx]

## Sheet: Table S5
Table S5. Proportional contribution of major risk factors to the global socio-demographic index (SDI) burden in 2021.
Measure	Regions	Sex	Age	Risk	Metric	Year	Value	Upper	Lower
DALYs (Disability-Adjusted Life Years)	East Asia	Male	15-39 years	Tobacco	Number	1990	884.6795158723082	1251.8835929432569	546.9164648680116
DALYs (Disability-Adjusted Life Years)	East Asia	Female	15-39 years	Tobacco	Number	1990	8.757039511884022	16.2767404753214	3.845711868552086
DALYs (Disability-Adjusted Life Years)	East Asia	Both	15-39 years	Tobacco	Number	1990	893.4365553841924	1266.6858241330046	551.5819991610281
DALYs (Disability-Adjusted Life Years)	East Asia	Male	15-39 years	Tobacco	Percent	1990	0.0313761211108998	0.0438530750709311	0.0200877990971053
DALYs (Disability-Adjusted Life Years)	East Asia	Female	15-39 years	Tobacco	Percent	1990	0.0005656967482649	0.0010194698221075	0.0002573294931027
DALYs (Disability-Adjusted Life Years)	East Asia	Both	15-39 years	Tobacco	Percent	1990	0.0204706922940979	0.0288355483276131	0.0131362277689468
DALYs (Disability-Adjusted Life Years)	East Asia	Male	15-39 years	Tobacco	Rate	1990	0.30416684026999996	0.430417	0.18803854959000002
DALYs (Disability-Adjusted Life Years)	East Asia	Female	15-39 years	Tobacco	Rate	1990	0.0031860821000000003	0.00592198	0.00139919
DALYs (Disability-Adjusted Life Years)	East Asia	Both	15-39 years	Tobacco	Rate	1990	0.157933	0.22391227582000003	0.0975032
DALYs (Disability-Adjusted Life Years)	East Asia	Male	15-39 years	Tobacco	Number	1991	929.7691805901472	1329.7826499839284	553.9265916537593
DALYs (Disability-Adjusted Life Years)	East Asia	Female	15-39 years	Tobacco	Number	1991	9.244393785561824	16.203536945652694	3.988909968336595
DALYs (Disability-Adjusted Life Years)	East Asia	Both	15-39 years	Tobacco	Number	1991	939.013574375711	1344.4217033891296	560.2348256956723
DALYs (Disability-Adjusted Life Years)	East Asia	Male	15-39 years	Tobacco	Percent	1991	0.0323839365372587	0.045126176617959	0.0207953537968162
DALYs (Disability-Adjusted Life Years)	East Asia	Female	15-39 years	Tobacco	Percent	1991	0.0005961114576306	0.001048063835712	0.0002738825697723
DALYs (Disability-Adjusted Life Years)	East Asia	Both	15-39 years	Tobacco	Percent	1991	0.0212314803069519	0.0300739259746213	0.0133818112653763
DALYs (Disability-Adjusted Life Years)	East Asia	Male	15-39 years	Tobacco	Rate	1991	0.31690308918000004	0.453244	0.18880067411999998
DALYs (Disability-Adjusted Life Years)	East Asia	Female	15-39 years	Tobacco	Rate	1991	0.0033438360900000003	0.00586106	0.00144285
DALYs (Disability-Adjusted Life Years)	East Asia	Both	15-39 years	Tobacco	Rate	1991	0.16478171759000002	0.235924	0.09831216433000001
DALYs (Disability-Adjusted Life Years)	East Asia	Male	15-39 years	Tobacco	Number	1992	940.9864459520772	1367.0340279323318	565.034342799668
DALYs (Disability-Adjusted Life Years)	East Asia	Female	15-39 years	Tobacco	Number	1992	9.490573637098134	17.106063528954614	4.147100744905671
DALYs (Disability-Adjusted Life Years)	East Asia	Both	15-39 years	Tobacco	Number	1992	950.4770195891746	1379.8758572662628	569.8743125350359
DALYs (Disability-Adjusted Life Years)	East Asia	Male	15-39 years	Tobacco	Percent	1992	0.0335452899960625	0.0468629955501099	0.021604510022413
DALYs (Disability-Adjusted Life Years)	East Asia	Female	15-39 years	Tobacco	Percent	1992	0.0006304310915857	0.0011034937238338	0.0002950003829118
DALYs (Disability-Adjusted Life Years)	East Asia	Both	15-39 years	Tobacco	Percent	1992	0.0220582603507646	0.0313159943418944	0.0138990941000923
DALYs (Disability-Adjusted Life Years)	East Asia	Male	15-39 years	Tobacco	Rate	1992	0.319414	0.464034	0.191798
DALYs (Disability-Adjusted Life Years)	East Asia	Female	15-39 years	Tobacco	Rate	1992	0.00342717	0.00617723	0.0014975741200000002
DALYs (Disability-Adjusted Life Years)	East Asia	Both	15-39 years	Tobacco	Rate	1992	0.166307	0.24143998073999998	0.09971218956000001
DALYs (Disability-Adjusted Life Years)	East Asia	Male	15-39 years	Tobacco	Number	1993	941.5013820612426	1358.365563356774	582.1107338437296
DALYs (Disability-Adjusted Life Years)	East Asia	Female	15-39 years	Tobacco	Number	1993	9.660024348048646	17.468069988207265	4.514004056055007
DALYs (Disability-Adjusted Life Years)	East Asia	Both	15-39 years	Tobacco	Number	1993	951.1614064092912	1370.855759495729	587.8602032271253
DALYs (Disability-Adjusted Life Years)	East Asia	Male	15-39 years	Tobacco	Percent	1993	0.0343651640144392	0.0482668355571279	0.0221976818666274
DALYs (Disability-Adjusted Life Years)	East Asia	Female	15-39 years	Tobacco	Percent	1993	0.0006694563109313	0.0011472015213267	0.0003184320474393
DALYs (Disability-Adjusted Life Years)	East Asia	Both	15-39 years	Tobacco	Percent	1993	0.0227407982946997	0.0316316957863933	0.014724897884816
DALYs (Disability-Adjusted Life Years)	East Asia	Male	15-39 years	Tobacco	Rate	1993	0.319719	0.46127917843000005	0.19767547727999998
DALYs (Disability-Adjusted Life Years)	East Asia	Female	15-39 years	Tobacco	Rate	1993	0.00349494	0.0063198412699999994	0.0016331391600000003
DALYs (Disability-Adjusted Life Years)	East Asia	Both	15-39 years	Tobacco	Rate	1993	0.166614	0.240131	0.10297467504999999
DALYs (Disability-Adjusted Life Years)	East Asia	Male	15-39 years	Tobacco	Number	1994	906.1934343467192	1300.005381275272	577.6173257768035
DALYs (Disability-Adjusted Life Years)	East Asia	Female	15-39 years	Tobacco	Number	1994	9.587720734905908	16.645802369569097	4.31202558213676
DALYs (Disability-Adjusted Life Years)	East Asia	Both	15-39 years	Tobacco	Number	1994	915.7811550816256	1317.1760710192043	582.3852960245631
DALYs (Disability-Adjusted Life Years)	East Asia	Male	15-39 years	Tobacco	Percent	1994	0.0348687963299643	0.0485177213846487	0.0225088116874929
DALYs (Disability-Adjusted Life Years)	East Asia	Female	15-39 years	Tobacco	Percent	1994	0.0007022111495769	0.0011699606176784	0.0003335145866523
DALYs (Disability-Adjusted Life Years)	East Asia	Both	15-39 years	Tobacco	Percent	1994	0.0230979802301174	0.0320861233598345	0.0148890554827972
DALYs (Disability-Adjusted Life Years)	East Asia	Male	15-39 years	Tobacco	Rate	1994	0.308886	0.443121	0.196887
DALYs (Disability-Adjusted Life Years)	East Asia	Female	15-39 years	Tobacco	Rate	1994	0.0034825	0.006046166119999999	0.00156623
DALYs (Disability-Adjusted Life Years)	East Asia	Both	15-39 years	Tobacco	Rate	1994	0.161034	0.231617	0.10240885296999999
DALYs (Disability-Adjusted Life Years)	East Asia	Male	15-39 years	Tobacco	Number	1995	871.2218807801997	1225.068523151237	553.2108158518683
DALYs (Disability-Adjusted Life Years)	East Asia	Female	15-39 years	Tobacco	Number	1995	9.68792476673194	16.828990401205814	4.479632498352103
DALYs (Disability-Adjusted Life Years)	East Asia	Both	15-39 years	Tobacco	Number	1995	880.9098055469318	1239.012872351943	557.420262039404
DALYs (Disability-Adjusted Life Years)	East Asia	Male	15-39 years	Tobacco	Percent	1995	0.0350829067167388	0.0488337996458183	0.0227501830311127
DALYs (Disability-Adjusted Life Years)	East Asia	Female	15-39 years	Tobacco	Percent	1995	0.0007327599870534	0.001234039785672	0.0003488759878916
DALYs (Disability-Adjusted Life Years)	East Asia	Both	15-39 years	Tobacco	Percent	1995	0.0231470239378909	0.0320911564478956	0.0149061839766434
DALYs (Disability-Adjusted Life Years)	East Asia	Male	15-39 years	Tobacco	Rate	1995	0.298623	0.419909	0.18962068304000002
DALYs (Disability-Adjusted Life Years)	East Asia	Female	15-39 years	Tobacco	Rate	1995	0.00353484	0.0061404	0.0016344849499999997
DALYs (Disability-Adjusted Life Years)	East Asia	Both	15-39 years	Tobacco	Rate	1995	0.155688	0.21897805293000003	0.0985162
DALYs (Disability-Adjusted Life Years)	East Asia	Male	15-39 years	Tobacco	Number	1996	877.1494394040747	1222.8470570011204	545.2912608730805
DALYs (Disability-Adjusted Life Years)	East Asia	Female	15-39 years	Tobacco	Number	1996	9.747298864021047	16.56960661890837	4.8201452678004095
DALYs (Disability-Adjusted Life Years)	East Asia	Both	15-39 years	Tobacco	Number	1996	886.8967382680939	1235.671839148948	551.3937208009834
DALYs (Disability-Adjusted Life Years)	East Asia	Male	15-39 years	Tobacco	Percent	1996	0.0352057407198224	0.0489706449359955	0.0228618802937392
DALYs (Disability-Adjusted Life Years)	East Asia	Female	15-39 years	Tobacco	Percent	1996	0.0007590392393518	0.0012869697602376	0.00037883176749
DALYs (Disability-Adjusted Life Years)	East Asia	Both	15-39 years	Tobacco	Percent	1996	0.0234802385115937	0.03240597029615	0.0148226951136759
DALYs (Disability-Adjusted Life Years)	East Asia	Male	15-39 years	Tobacco	Rate	1996	0.302383	0.421556	0.18798016338999998
DALYs (Disability-Adjusted Life Years)	East Asia	Female	15-39 years	Tobacco	Rate	1996	0.0035695186400000003	0.006067888180000001	0.00176517
DALYs (Disability-Adjusted Life Years)	East Asia	Both	15-39 years	Tobacco	Rate	1996	0.157489	0.21942161460999998	0.09791248506999999
DALYs (Disability-Adjusted Life Years)	East Asia	Male	15-39 years	Tobacco	Number	1997	912.7186980751078	1281.6146393374615	575.8264159742844
DALYs (Disability-Adjusted Life Years)	East Asia	Female	15-39 years	Tobacco	Number	1997	9.992943618889804	16.91677869738413	5.009319252366925
DALYs (Disability-Adjusted Life Years)	East Asia	Both	15-39 years	Tobacco	Number	1997	922.7116416939978	1294.9719033965212	581.8791649279829
DALYs (Disability-Adjusted Life Years)	East Asia	Male	15-39 years	Tobacco	Percent	1997	0.0356653458595317	0.0493114202995796	0.0229735732058162
DALYs (Disability-Adjusted Life Years)	East Asia	Female	15-39 years	Tobacco	Percent	1997	0.000783964028178	0.001326100526241	0.0004095979435887
DALYs (Disability-Adjusted Life Years)	East Asia	Both	15-39 years	Tobacco	Percent	1997	0.0240623261524735	0.0335569131202456	0.0155677620312599
DALYs (Disability-Adjusted Life Years)	East Asia	Male	15-39 years	Tobacco	Rate	1997	0.315749	0.44336647509000005	0.199204
DALYs (Disability-Adjusted Life Years)	East Asia	Female	15-39 years	Tobacco	Rate	1997	0.00366194	0.0061991999200000005	0.00183568
DALYs (Disability-Adjusted Life Years)	East Asia	Both	15-39 years	Tobacco	Rate	1997	0.164198	0.230442	0.103546
DALYs (Disability-Adjusted Life Years)	East Asia	Male	15-39 years	Tobacco	Number	1998	932.9905379513704	1306.2895023900046	597.6679969125221
DALYs (Disability-Adjusted Life Years)	East Asia	Female	15-39 years	Tobacco	Number	1998	10.274426302804605	17.486357711636177	5.354317310895176
DALYs (Disability-Adjusted Life Years)	East Asia	Both	15-39 years	Tobacco	Number	1998	943.2649642541744	1321.5518985217864	602.9079246787683
DALYs (Disability-Adjusted Life Years)	East Asia	Male	15-39 years	Tobacco	Percent	1998	0.0362916842041595	0.0499692836658332	0.0234504966433543
DALYs (Disability-Adjusted Life Years)	East Asia	Female	15-39 years	Tobacco	Percent	1998	0.0007855582279929	0.0013077150840759	0.0004215730437436
DALYs (Disability-Adjusted Life Years)	East Asia	Both	15-39 years	Tobacco	Percent	1998	0.0243147774867353	0.0337930928594054	0.0158244502167185
DALYs (Disability-Adjusted Life Years)	East Asia	Male	15-39 years	Tobacco	Rate	1998	0.322331	0.451299	0.20648312107999997
DALYs (Disability-Adjusted Life Years)	East Asia	Female	15-39 years	Tobacco	Rate	1998	0.0037475816799999997	0.00637812	0.0019529792600000001
DALYs (Disability-Adjusted Life Years)	East Asia	Both	15-39 years	Tobacco	Rate	1998	0.16736	0.234479	0.106972
DALYs (Disability-Adjusted Life Years)	East Asia	Male	15-39 years	Tobacco	Number	1999	972.8324141009016	1337.766688586284	608.9188595705194
DALYs (Disability-Adjusted Life Years)	East Asia	Female	15-39 years	Tobacco	Number	1999	10.898347279140893	18.357215056895942	5.669633259506182
DALYs (Disability-Adjusted Life Years)	East Asia	Both	15-39 years	Tobacco	Number	1999	983.7307613800432	1354.5824144715452	615.4845032213353
DALYs (Disability-Adjusted Life Years)	East Asia	Male	15-39 years	Tobacco	Percent	1999	0.0364797215129124	0.0503584297789109	0.0235411456814204
DALYs (Disability-Adjusted Life Years)	East Asia	Female	15-39 years	Tobacco	Percent	1999	0.0007976591458814	0.0013528323223774	0.0004251547997155
DALYs (Disability-Adjusted Life Years)	East Asia	Both	15-39 years	Tobacco	Percent	1999	0.0243773911988094	0.0336403899101535	0.0155996971989682
DALYs (Disability-Adjusted Life Years)	East Asia	Male	15-39 years	Tobacco	Rate	1999	0.33408	0.45940163278999996	0.209108
DALYs (Disability-Adjusted Life Years)	East Asia	Female	15-39 years	Tobacco	Rate	1999	0.00393752	0.0066323788600000004	0.0020484128800000003
DALYs (Disability-Adjusted Life Years)	East Asia	Both	15-39 years	Tobacco	Rate	1999	0.173198	0.238491	0.108364
DALYs (Disability-Adjusted Life Years)	East Asia	Male	15-39 years	Tobacco	Number	2000	1068.1216243867973	1492.3370304693658	694.0616828717351
DALYs (Disability-Adjusted Life Years)	East Asia	Female	15-39 years	Tobacco	Number	2000	11.864122746583632	20.186168696825828	5.940621536368426
DALYs (Disability-Adjusted Life Years)	East Asia	Both	15-39 years	Tobacco	Number	2000	1079.9857471333798	1510.7906637249798	700.4557788200423
DALYs (Disability-Adjusted Life Years)	East Asia	Male	15-39 years	Tobacco	Percent	2000	0.0367328561535292	0.0501058834951666	0.0239174900661016
DALYs (Disability-Adjusted Life Years)	East Asia	Female	15-39 years	Tobacco	Percent	2000	0.0008136820592122	0.0013732248070233	0.000430395265205
DALYs (Disability-Adjusted Life Years)	East Asia	Both	15-39 years	Tobacco	Percent	2000	0.0247281951052339	0.0340871122729803	0.0161771304202668
DALYs (Disability-Adjusted Life Years)	East Asia	Male	15-39 years	Tobacco	Rate	2000	0.36348	0.50784	0.236188
DALYs (Disability-Adjusted Life Years)	East Asia	Female	15-39 years	Tobacco	Rate	2000	0.00423334	0.00720279	0.00211972
DALYs (Disability-Adjusted Life Years)	East Asia	Both	15-39 years	Tobacco	Rate	2000	0.188113	0.263152	0.122006
DALYs (Disability-Adjusted Life Years)	East Asia	Male	15-39 years	Tobacco	Number	2001	1180.800699054889	1681.229078474319	746.9500987346906
DALYs (Disability-Adjusted Life Years)	East Asia	Female	15-39 years	Tobacco	Number	2001	13.083837973277795	22.257650568836148	6.643576659014954
DALYs (Disability-Adjusted Life Years)	East Asia	Both	15-39 years	Tobacco	Number	2001	1193.884537028166	1695.8898005703463	753.0775985233349
DALYs (Disability-Adjusted Life Years)	East Asia	Male	15-39 years	Tobacco	Percent	2001	0.0374110927811875	0.0511949963089702	0.0245872353420071
DALYs (Disability-Adjusted Life Years)	East Asia	Female	15-39 years	Tobacco	Percent	2001	0.0008357116368741	0.0013829595556531	0.000454436568024
DALYs (Disability-Adjusted Life Years)	East Asia	Both	15-39 years	Tobacco	Percent	2001	0.0252806006380999	0.0352374846336494	0.016124142320829
DALYs (Disability-Adjusted Life Years)	East Asia	Male	15-39 years	Tobacco	Rate	2001	0.39781510252999996	0.5664108420399999	0.25165
DALYs (Disability-Adjusted Life Years)	East Asia	Female	15-39 years	Tobacco	Rate	2001	0.00460857	0.00783989	0.00234009
DALYs (Disability-Adjusted Life Years)	East Asia	Both	15-39 years	Tobacco	Rate	2001	0.20558556557000002	0.29203	0.129679
DALYs (Disability-Adjusted Life Years)	East Asia	Male	15-39 years	Tobacco	Number	2002	1326.3596648979938	1838.5096484182732	864.9969894863665
DALYs (Disability-Adjusted Life Years)	East Asia	Female	15-39 years	Tobacco	Number	2002	13.738974714184405	21.97895066861712	7.293899935415554
DALYs (Disability-Adjusted Life Years)	East Asia	Both	15-39 years	Tobacco	Number	2002	1340.0986396121766	1859.2924104609333	873.3179446540719
DALYs (Disability-Adjusted Life Years)	East Asia	Male	15-39 years	Tobacco	Percent	2002	0.038205571046102	0.0524795620817844	0.025191734687137
DALYs (Disability-Adjusted Life Years)	East Asia	Female	15-39 years	Tobacco	Percent	2002	0.0008370645798957	0.0013527247168187	0.0004544487491981
DALYs (Disability-Adjusted Life Years)	East Asia	Both	15-39 years	Tobacco	Percent	2002	0.0262001281195364	0.0362948251091981	0.0171660075985277
DALYs (Disability-Adjusted Life Years)	East Asia	Male	15-39 years	Tobacco	Rate	2002	0.44327040792999994	0.614431	0.289083
DALYs (Disability-Adjusted Life Years)	East Asia	Female	15-39 years	Tobacco	Rate	2002	0.00478848	0.007660382120000001	0.00254216
DALYs (Disability-Adjusted Life Years)	East Asia	Both	15-39 years	Tobacco	Rate	2002	0.228632	0.31721	0.148995
DALYs (Disability-Adjusted Life Years)	East Asia	Male	15-39 years	Tobacco	Number	2003	1433.923997998461	2018.0296130544475	906.3364510405776
DALYs (Disability-Adjusted Life Years)	East Asia	Female	15-39 years	Tobacco	Number	2003	13.827412489000253	22.72867161152716	7.389726449515637
DALYs (Disability-Adjusted Life Years)	East Asia	Both	15-39 years	Tobacco	Number	2003	1447.7514104874597	2039.30312961528	913.7382463026452
DALYs (Disability-Adjusted Life Years)	East Asia	Male	15-39 years	Tobacco	Percent	2003	0.0377588042728721	0.0517660121306511	0.0248398083832574
DALYs (Disability-Adjusted Life Years)	East Asia	Female	15-39 years	Tobacco	Percent	2003	0.0008198546718189	0.001321092940604	0.000448620739773
DALYs (Disability-Adjusted Life Years)	East Asia	Both	15-39 years	Tobacco	Percent	2003	0.0263865220872058	0.0360833680982565	0.0171544474414877
DALYs (Disability-Adjusted Life Years)	East Asia	Male	15-39 years	Tobacco	Rate	2003	0.47710989997000003	0.67146	0.301566
DALYs (Disability-Adjusted Life Years)	East Asia	Female	15-39 years	Tobacco	Rate	2003	0.00478826	0.00787066	0.00255897
DALYs (Disability-Adjusted Life Years)	East Asia	Both	15-39 years	Tobacco	Rate	2003	0.245664	0.346043	0.15504931177999998
DALYs (Disability-Adjusted Life Years)	East Asia	Male	15-39 years	Tobacco	Number	2004	1457.2144935300637	2000.6153284957957	902.9161995782438
DALYs (Disability-Adjusted Life Years)	East Asia	Female	15-39 years	Tobacco	Number	2004	13.769812347558805	22.938912660291606	6.984577079654319
DALYs (Disability-Adjusted Life Years)	East Asia	Both	15-39 years	Tobacco	Number	2004	1470.9843058776232	2021.175517477563	912.2507360982728
DALYs (Disability-Adjusted Life Years)	East Asia	Male	15-39 years	Tobacco	Percent	2004	0.0375637208665037	0.0516268473174943	0.024825078068951
DALYs (Disability-Adjusted Life Years)	East Asia	Female	15-39 years	Tobacco	Percent	2004	0.0008117377188136	0.0013273778782059	0.0004314163546477
DALYs (Disability-Adjusted Life Years)	East Asia	Both	15-39 years	Tobacco	Percent	2004	0.0263811773088572	0.0360365455509631	0.0171200641056353
DALYs (Disability-Adjusted Life Years)	East Asia	Male	15-39 years	Tobacco	Rate	2004	0.484009	0.664498	0.299901
DALYs (Disability-Adjusted Life Years)	East Asia	Female	15-39 years	Tobacco	Rate	2004	0.00475159	0.00791559	0.00241019
DALYs (Disability-Adjusted Life Years)	East Asia	Both	15-39 years	Tobacco	Rate	2004	0.24895407890000001	0.34207	0.154392
DALYs (Disability-Adjusted Life Years)	East Asia	Male	15-39 years	Tobacco	Number	2005	1444.4751218235858	2010.6083893416055	909.6661521184732
DALYs (Disability-Adjusted Life Years)	East Asia	Female	15-39 years	Tobacco	Number	2005	13.381646655933714	21.62624857183763	6.610084300189317
DALYs (Disability-Adjusted Life Years)	East Asia	Both	15-39 years	Tobacco	Number	2005	1457.8567684795194	2025.2832355801904	915.7629393462216
DALYs (Disability-Adjusted Life Years)	East Asia	Male	15-39 years	Tobacco	Percent	2005	0.0375755794970195	0.0514604252363402	0.0246760501117903
DALYs (Disability-Adjusted Life Years)	East Asia	Female	15-39 years	Tobacco	Percent	2005	0.0008060531257787	0.0013204219979341	0.000412103617816
DALYs (Disability-Adjusted Life Years)	East Asia	Both	15-39 years	Tobacco	Percent	2005	0.0264770457184337	0.0357863528107672	0.0173127990653362
DALYs (Disability-Adjusted Life Years)	East Asia	Male	15-39 years	Tobacco	Rate	2005	0.480193	0.668395	0.302404
DALYs (Disability-Adjusted Life Years)	East Asia	Female	15-39 years	Tobacco	Rate	2005	0.004615132629999999	0.00745857	0.00227972
DALYs (Disability-Adjusted Life Years)	East Asia	Both	15-39 years	Tobacco	Rate	2005	0.246775	0.342825	0.155014
DALYs (Disability-Adjusted Life Years)	East Asia	Male	15-39 years	Tobacco	Number	2006	1412.7931831113342	1945.1184221605636	884.3422716499163
DALYs (Disability-Adjusted Life Years)	East Asia	Female	15-39 years	Tobacco	Number	2006	12.63135335862644	20.93623629484468	6.903002760517014
DALYs (Disability-Adjusted Life Years)	East Asia	Both	15-39 years	Tobacco	Number	2006	1425.4245364699582	1962.7418973193892	891.7287316461002
DALYs (Disability-Adjusted Life Years)	East Asia	Male	15-39 years	Tobacco	Percent	2006	0.0376153780291541	0.0513866548583736	0.0245707195018094
DALYs (Disability-Adjusted Life Years)	East Asia	Female	15-39 years	Tobacco	Percent	2006	0.0007953375203521	0.0013055536910264	0.0004261232202658
DALYs (Disability-Adjusted Life Years)	East Asia	Both	15-39 years	Tobacco	Percent	2006	0.0266657489199972	0.036390896024486	0.0171494672755726
DALYs (Disability-Adjusted Life Years)	East Asia	Male	15-39 years	Tobacco	Rate	2006	0.47168992990999997	0.649418	0.295256
DALYs (Disability-Adjusted Life Years)	East Asia	Female	15-39 years	Tobacco	Rate	2006	0.00437205	0.0072465939400000005	0.00238931
DALYs (Disability-Adjusted Life Years)	East Asia	Both	15-39 years	Tobacco	Rate	2006	0.242243	0.333556	0.15154404400000002
DALYs (Disability-Adjusted Life Years)	East Asia	Male	15-39 years	Tobacco	Number	2007	1396.1094909080484	1942.4948850552205	893.6993794138342
DALYs (Disability-Adjusted Life Years)	East Asia	Female	15-39 years	Tobacco	Number	2007	11.858822918281533	19.759931147207027	6.337622027927532
DALYs (Disability-Adjusted Life Years)	East Asia	Both	15-39 years	Tobacco	Number	2007	1407.9683138263294	1962.2995796530183	899.924466712318
DALYs (Disability-Adjusted Life Years)	East Asia	Male	15-39 years	Tobacco	Percent	2007	0.037264871583642	0.0505682539364586	0.0243760713640399
DALYs (Disability-Adjusted Life Years)	East Asia	Female	15-39 years	Tobacco	Percent	2007	0.0007716564111015	0.0012799772751681	0.000409045654151
DALYs (Disability-Adjusted Life Years)	East Asia	Both	15-39 years	Tobacco	Percent	2007	0.026635328682666	0.036361894294742	0.0172329134207912
DALYs (Disability-Adjusted Life Years)	East Asia	Male	15-39 years	Tobacco	Rate	2007	0.469652	0.653456	0.30064081732000003
DALYs (Disability-Adjusted Life Years)	East Asia	Female	15-39 years	Tobacco	Rate	2007	0.0041333240500000005	0.00688721	0.00220894
DALYs (Disability-Adjusted Life Years)	East Asia	Both	15-39 years	Tobacco	Rate	2007	0.241019	0.335911	0.154051
DALYs (Disability-Adjusted Life Years)	East Asia	Male	15-39 years	Tobacco	Number	2008	1371.283582640476	1870.8158948665537	871.0461555986303
DALYs (Disability-Adjusted Life Years)	East Asia	Female	15-39 years	Tobacco	Number	2008	11.508134011613674	18.90572956886096	5.984045117748424
DALYs (Disability-Adjusted Life Years)	East Asia	Both	15-39 years	Tobacco	Number	2008	1382.7917166520908	1886.460819808684	879.8498619780207
DALYs (Disability-Adjusted Life Years)	East Asia	Male	15-39 years	Tobacco	Percent	2008	0.0368223251960882	0.0497617576904395	0.0241345314017947
DALYs (Disability-Adjusted Life Years)	East Asia	Female	15-39 years	Tobacco	Percent	2008	0.0007477814626804	0.0012326247607058	0.0003837845575161
DALYs (Disability-Adjusted Life Years)	East Asia	Both	15-39 years	Tobacco	Percent	2008	0.0262668089309215	0.0357323483348974	0.0170721038700984
DALYs (Disability-Adjusted Life Years)	East Asia	Male	15-39 years	Tobacco	Rate	2008	0.46581178113000005	0.635498	0.295886
DALYs (Disability-Adjusted Life Years)	East Asia	Female	15-39 years	Tobacco	Rate	2008	0.00404829	0.006650587110000001	0.0021050451000000003
DALYs (Disability-Adjusted Life Years)	East Asia	Both	15-39 years	Tobacco	Rate	2008	0.238966	0.326007	0.15205
DALYs (Disability-Adjusted Life Years)	East Asia	Male	15-39 years	Tobacco	Number	2009	1378.8654480302012	1898.0664724852863	872.32503581044
DALYs (Disability-Adjusted Life Years)	East Asia	Female	15-39 years	Tobacco	Number	2009	11.501309004755033	19.157333690760773	6.087469481064531
DALYs (Disability-Adjusted Life Years)	East Asia	Both	15-39 years	Tobacco	Number	2009	1390.3667570349585	1917.8409056641071	879.9064085227129
DALYs (Disability-Adjusted Life Years)	East Asia	Male	15-39 years	Tobacco	Percent	2009	0.0360724621208924	0.048792569904044	0.0235064227466758
DALYs (Disability-Adjusted Life Years)	East Asia	Female	15-39 years	Tobacco	Percent	2009	0.0007271621271819	0.0011942309553114	0.0003632391346821
DALYs (Disability-Adjusted Life Years)	East Asia	Both	15-39 years	Tobacco	Percent	2009	0.0257166990056524	0.0350164774955703	0.0164973829653266
DALYs (Disability-Adjusted Life Years)	East Asia	Male	15-39 years	Tobacco	Rate	2009	0.47378	0.652178	0.299732
DALYs (Disability-Adjusted Life Years)	East Asia	Female	15-39 years	Tobacco	Rate	2009	0.00409078	0.00681387	0.00216519
DALYs (Disability-Adjusted Life Years)	East Asia	Both	15-39 years	Tobacco	Rate	2009	0.242992	0.335177	0.153779
DALYs (Disability-Adjusted Life Years)	East Asia	Male	15-39 years	Tobacco	Number	2010	1366.3747731137196	1889.7746403643837	873.5132233559716
DALYs (Disability-Adjusted Life Years)	East Asia	Female	15-39 years	Tobacco	Number	2010	10.975481455271964	18.61066707566368	5.69920618711072
DALYs (Disability-Adjusted Life Years)	East Asia	Both	15-39 years	Tobacco	Number	2010	1377.350254568992	1905.20841311244	879.5491113924734
DALYs (Disability-Adjusted Life Years)	East Asia	Male	15-39 years	Tobacco	Percent	2010	0.035353929111677	0.0479672123332828	0.0227794992735926
DALYs (Disability-Adjusted Life Years)	East Asia	Female	15-39 years	Tobacco	Percent	2010	0.0006988619069097	0.0011444927801123	0.0003509384326721
DALYs (Disability-Adjusted Life Years)	East Asia	Both	15-39 years	Tobacco	Percent	2010	0.025339872005958	0.0345516908550402	0.0162057515573206
DALYs (Disability-Adjusted Life Years)	East Asia	Male	15-39 years	Tobacco	Rate	2010	0.475698	0.657917	0.30411
DALYs (Disability-Adjusted Life Years)	East Asia	Female	15-39 years	Tobacco	Rate	2010	0.00395489	0.00670614	0.0020536431400000003
DALYs (Disability-Adjusted Life Years)	East Asia	Both	15-39 years	Tobacco	Rate	2010	0.243886	0.337353	0.155741
DALYs (Disability-Adjusted Life Years)	East Asia	Male	15-39 years	Tobacco	Number	2011	1302.9216320947178	1840.748544504264	824.7731872102247
DALYs (Disability-Adjusted Life Years)	East Asia	Female	15-39 years	Tobacco	Number	2011	10.571749612694678	18.043407697920763	5.293567606647416
DALYs (Disability-Adjusted Life Years)	East Asia	Both	15-39 years	Tobacco	Number	2011	1313.4933817074111	1857.836072925268	831.5416546566944
DALYs (Disability-Adjusted Life Years)	East Asia	Male	15-39 years	Tobacco	Percent	2011	0.0344319728386569	0.0470040583645725	0.0223565273171769
DALYs (Disability-Adjusted Life Years)	East Asia	Female	15-39 years	Tobacco	Percent	2011	0.0006817227734725	0.0011217528996002	0.0003447408280078
DALYs (Disability-Adjusted Life Years)	East Asia	Both	15-39 years	Tobacco	Percent	2011	0.0246155785520807	0.0343463461277148	0.0160395618438899
DALYs (Disability-Adjusted Life Years)	East Asia	Male	15-39 years	Tobacco	Rate	2011	0.46051842064000004	0.650614	0.291517
DALYs (Disability-Adjusted Life Years)	East Asia	Female	15-39 years	Tobacco	Rate	2011	0.0038690514400000005	0.00660353	0.00193734
DALYs (Disability-Adjusted Life Years)	East Asia	Both	15-39 years	Tobacco	Rate	2011	0.23617	0.334045	0.149514
DALYs (Disability-Adjusted Life Years)	East Asia	Male	15-39 years	Tobacco	Number	2012	1225.9091756213527	1766.6530198393252	751.0890675523001
DALYs (Disability-Adjusted Life Years)	East Asia	Female	15-39 years	Tobacco	Number	2012	9.980755177419075	16.947053189220433	5.159084148306446
DALYs (Disability-Adjusted Life Years)	East Asia	Both	15-39 years	Tobacco	Number	2012	1235.8899307987704	1779.298716308327	756.6512618403145
DALYs (Disability-Adjusted Life Years)	East Asia	Male	15-39 years	Tobacco	Percent	2012	0.0332204574463455	0.0455589309375328	0.0217065526030176
DALYs (Disability-Adjusted Life Years)	East Asia	Female	15-39 years	Tobacco	Percent	2012	0.0006761932875856	0.0011287362310369	0.0003423536855599
DALYs (Disability-Adjusted Life Years)	East Asia	Both	15-39 years	Tobacco	Percent	2012	0.0239114577241073	0.0332011438424521	0.0152083767262116
DALYs (Disability-Adjusted Life Years)	East Asia	Male	15-39 years	Tobacco	Rate	2012	0.440616	0.63497	0.269956
DALYs (Disability-Adjusted Life Years)	East Asia	Female	15-39 years	Tobacco	Rate	2012	0.0037206195000000003	0.00631751	0.0019232
DALYs (Disability-Adjusted Life Years)	East Asia	Both	15-39 years	Tobacco	Rate	2012	0.22615399233999997	0.325592	0.13845869232000002
DALYs (Disability-Adjusted Life Years)	East Asia	Male	15-39 years	Tobacco	Number	2013	1188.250366166504	1715.7810608658758	749.6044630781568
DALYs (Disability-Adjusted Life Years)	East Asia	Female	15-39 years	Tobacco	Number	2013	9.390498229800166	16.290591867196234	4.756558565053012
DALYs (Disability-Adjusted Life Years)	East Asia	Both	15-39 years	Tobacco	Number	2013	1197.6408643963048	1728.174839174232	754.200464410442
DALYs (Disability-Adjusted Life Years)	East Asia	Male	15-39 years	Tobacco	Percent	2013	0.0324003405897006	0.0448039183929079	0.0211273202236581
DALYs (Disability-Adjusted Life Years)	East Asia	Female	15-39 years	Tobacco	Percent	2013	0.000661257397689	0.0010942552607631	0.0003333839545614
DALYs (Disability-Adjusted Life Years)	East Asia	Both	15-39 years	Tobacco	Percent	2013	0.0235335878816515	0.0333566759108861	0.0152562165019439
DALYs (Disability-Adjusted Life Years)	East Asia	Male	15-39 years	Tobacco	Rate	2013	0.434594	0.627535	0.274163
DALYs (Disability-Adjusted Life Years)	East Asia	Female	15-39 years	Tobacco	Rate	2013	0.00357369	0.006199626660000001	0.00181018
DALYs (Disability-Adjusted Life Years)	East Asia	Both	15-39 years	Tobacco	Rate	2013	0.223364	0.322311	0.140661
DALYs (Disability-Adjusted Life Years)	East Asia	Male	15-39 years	Tobacco	Number	2014	1237.1011320491773	1761.9032082729582	767.7173473923176
DALYs (Disability-Adjusted Life Years)	East Asia	Female	15-39 years	Tobacco	Number	2014	8.923711553729634	15.331319909747798	4.351933464184054
DALYs (Disability-Adjusted Life Years)	East Asia	Both	15-39 years	Tobacco	Number	2014	1246.024843602908	1774.677311628925	772.2134844121083
DALYs (Disability-Adjusted Life Years)	East Asia	Male	15-39 years	Tobacco	Percent	2014	0.0320055405157194	0.0437598614581215	0.020761699443729
DALYs (Disability-Adjusted Life Years)	East Asia	Female	15-39 years	Tobacco	Percent	2014	0.0006543781688476	0.0011005776749301	0.000326594372541
DALYs (Disability-Adjusted Life Years)	East Asia	Both	15-39 years	Tobacco	Percent	2014	0.0238179078521203	0.0332581214300463	0.015251406773208
DALYs (Disability-Adjusted Life Years)	East Asia	Male	15-39 years	Tobacco	Rate	2014	0.460007	0.65515	0.28547
DALYs (Disability-Adjusted Life Years)	East Asia	Female	15-39 years	Tobacco	Rate	2014	0.00346922	0.005960278469999999	0.0016918788100000002
DALYs (Disability-Adjusted Life Years)	East Asia	Both	15-39 years	Tobacco	Rate	2014	0.23681658358000002	0.337291	0.14676509872000001
DALYs (Disability-Adjusted Life Years)	East Asia	Male	15-39 years	Tobacco	Number	2015	1230.6076470709522	1755.0490424467146	773.8347114461508
DALYs (Disability-Adjusted Life Years)	East Asia	Female	15-39 years	Tobacco	Number	2015	8.678556344900088	15.018250949094732	4.15212038111111
DALYs (Disability-Adjusted Life Years)	East Asia	Both	15-39 years	Tobacco	Number	2015	1239.2862034158525	1771.226231354939	778.5503380913472
DALYs (Disability-Adjusted Life Years)	East Asia	Male	15-39 years	Tobacco	Percent	2015	0.0314816576848445	0.0433617501555781	0.0203852851113969
DALYs (Disability-Adjusted Life Years)	East Asia	Female	15-39 years	Tobacco	Percent	2015	0.0006577118712548	0.0011200038438585	0.0003221377439045
DALYs (Disability-Adjusted Life Years)	East Asia	Both	15-39 years	Tobacco	Percent	2015	0.0236905077337955	0.0328760756049547	0.0151457022309454
DALYs (Disability-Adjusted Life Years)	East Asia	Male	15-39 years	Tobacco	Rate	2015	0.46426	0.662112	0.291938
DALYs (Disability-Adjusted Life Years)	East Asia	Female	15-39 years	Tobacco	Rate	2015	0.00344365	0.00595924	0.0016475593000000001
DALYs (Disability-Adjusted Life Years)	East Asia	Both	15-39 years	Tobacco	Rate	2015	0.239668	0.342541	0.15056531172999998
DALYs (Disability-Adjusted Life Years)	East Asia	Male	15-39 years	Tobacco	Number	2016	1234.3375052853007	1809.34854952183	777.16766922489
DALYs (Disability-Adjusted Life Years)	East Asia	Female	15-39 years	Tobacco	Number	2016	8.751584479741764	15.452639844540434	3.856975220513612
DALYs (Disability-Adjusted Life Years)	East Asia	Both	15-39 years	Tobacco	Number	2016	1243.0890897650415	1822.7117049374435	782.5033528925856
DALYs (Disability-Adjusted Life Years)	East Asia	Male	15-39 years	Tobacco	Percent	2016	0.0311598433994511	0.042704737526415	0.0202187502533794
DALYs (Disability-Adjusted Life Years)	East Asia	Female	15-39 years	Tobacco	Percent	2016	0.0006657620280683	0.0011271829897887	0.0003190990383617
DALYs (Disability-Adjusted Life Years)	East Asia	Both	15-39 years	Tobacco	Percent	2016	0.0235512472440515	0.0321079881774545	0.0147772233661156
DALYs (Disability-Adjusted Life Years)	East Asia	Male	15-39 years	Tobacco	Rate	2016	0.47138600828000005	0.690979	0.296796
DALYs (Disability-Adjusted Life Years)	East Asia	Female	15-39 years	Tobacco	Rate	2016	0.0035387583899999997	0.00624837	0.00155959
DALYs (Disability-Adjusted Life Years)	East Asia	Both	15-39 years	Tobacco	Rate	2016	0.244145	0.357984	0.153685
DALYs (Disability-Adjusted Life Years)	East Asia	Male	15-39 years	Tobacco	Number	2017	1265.9692299047467	1855.920087041466	761.9136735559646
DALYs (Disability-Adjusted Life Years)	East Asia	Female	15-39 years	Tobacco	Number	2017	8.842009322476054	15.723806829162507	4.133986320554855
DALYs (Disability-Adjusted Life Years)	East Asia	Both	15-39 years	Tobacco	Number	2017	1274.8112392272226	1866.8843053922476	767.5645092257776
DALYs (Disability-Adjusted Life Years)	East Asia	Male	15-39 years	Tobacco	Percent	2017	0.0312849364801887	0.0429605999956839	0.020156414920686
DALYs (Disability-Adjusted Life Years)	East Asia	Female	15-39 years	Tobacco	Percent	2017	0.0006746430225909	0.0011479632735033	0.0003268104954962
DALYs (Disability-Adjusted Life Years)	East Asia	Both	15-39 years	Tobacco	Percent	2017	0.0237887612788668	0.0332624412872891	0.0149335770963236
DALYs (Disability-Adjusted Life Years)	East Asia	Male	15-39 years	Tobacco	Rate	2017	0.48857274285999996	0.7162511900299999	0.294044
DALYs (Disability-Adjusted Life Years)	East Asia	Female	15-39 years	Tobacco	Rate	2017	0.00363932	0.00647183	0.00170152
DALYs (Disability-Adjusted Life Years)	East Asia	Both	15-39 years	Tobacco	Rate	2017	0.253909	0.371835	0.152879
DALYs (Disability-Adjusted Life Years)	East Asia	Male	15-39 years	Tobacco	Number	2018	1319.7800002142594	1918.354295395224	802.4218124319723
DALYs (Disability-Adjusted Life Years)	East Asia	Female	15-39 years	Tobacco	Number	2018	8.947372988267945	15.513152306516805	4.101045040528848
DALYs (Disability-Adjusted Life Years)	East Asia	Both	15-39 years	Tobacco	Number	2018	1328.7273732025278	1931.6913879014096	808.9557543941295
DALYs (Disability-Adjusted Life Years)	East Asia	Male	15-39 years	Tobacco	Percent	2018	0.0315420306628624	0.0432219013167015	0.0206907459945929
DALYs (Disability-Adjusted Life Years)	East Asia	Female	15-39 years	Tobacco	Percent	2018	0.0006853057328501	0.0011681817452412	0.0003332973034963
DALYs (Disability-Adjusted Life Years)	East Asia	Both	15-39 years	Tobacco	Percent	2018	0.0241854377810798	0.033673916891071	0.0153269298271335
DALYs (Disability-Adjusted Life Years)	East Asia	Male	15-39 years	Tobacco	Rate	2018	0.514372	0.747661	0.312737
DALYs (Disability-Adjusted Life Years)	East Asia	Female	15-39 years	Tobacco	Rate	2018	0.00374747	0.0064974403699999995	0.00171766
DALYs (Disability-Adjusted Life Years)	East Asia	Both	15-39 years	Tobacco	Rate	2018	0.268246	0.38997399350999995	0.163314
DALYs (Disability-Adjusted Life Years)	East Asia	Male	15-39 years	Tobacco	Number	2019	1336.2748795549846	1985.901088663584	808.5154799453353
DALYs (Disability-Adjusted Life Years)	East Asia	Female	15-39 years	Tobacco	Number	2019	9.019851720905937	16.089807192495556	3.999599322021784
DALYs (Disability-Adjusted Life Years)	East Asia	Both	15-39 years	Tobacco	Number	2019	1345.2947312758918	1998.868521846855	814.462823407543
DALYs (Disability-Adjusted Life Years)	East Asia	Male	15-39 years	Tobacco	Percent	2019	0.0317164457823112	0.0440522203967818	0.0207471824281067
DALYs (Disability-Adjusted Life Years)	East Asia	Female	15-39 years	Tobacco	Percent	2019	0.000694324652705	0.0011917408847202	0.0003209637118329
DALYs (Disability-Adjusted Life Years)	East Asia	Both	15-39 years	Tobacco	Percent	2019	0.0243872616776334	0.0337518236627401	0.0154702911321169
DALYs (Disability-Adjusted Life Years)	East Asia	Male	15-39 years	Tobacco	Rate	2019	0.5257042965800001	0.781274	0.31807831469000003
DALYs (Disability-Adjusted Life Years)	East Asia	Female	15-39 years	Tobacco	Rate	2019	0.0038430415799999996	0.0068553	0.00170409
DALYs (Disability-Adjusted Life Years)	East Asia	Both	15-39 years	Tobacco	Rate	2019	0.275171	0.408856	0.166593
DALYs (Disability-Adjusted Life Years)	East Asia	Male	15-39 years	Tobacco	Number	2020	1334.1795122774304	1949.5079533871008	810.9594790447477
DALYs (Disability-Adjusted Life Years)	East Asia	Female	15-39 years	Tobacco	Number	2020	8.939608246148797	15.94214831735583	3.7803463260502914
DALYs (Disability-Adjusted Life Years)	East Asia	Both	15-39 years	Tobacco	Number	2020	1343.1191205235775	1959.3389137106888	816.5608971604188
DALYs (Disability-Adjusted Life Years)	East Asia	Male	15-39 years	Tobacco	Percent	2020	0.0321826140756882	0.0447894050104319	0.0207373241852273
DALYs (Disability-Adjusted Life Years)	East Asia	Female	15-39 years	Tobacco	Percent	2020	0.0006929412812997	0.0012007275125547	0.0003120797007288
DALYs (Disability-Adjusted Life Years)	East Asia	Both	15-39 years	Tobacco	Percent	2020	0.0246934643537477	0.034958513874377	0.0156300347877171
DALYs (Disability-Adjusted Life Years)	East Asia	Male	15-39 years	Tobacco	Rate	2020	0.529091	0.7731090262800001	0.321599
DALYs (Disability-Adjusted Life Years)	East Asia	Female	15-39 years	Tobacco	Rate	2020	0.00386837	0.00689853	0.0016358423300000002
DALYs (Disability-Adjusted Life Years)	East Asia	Both	15-39 years	Tobacco	Rate	2020	0.277929	0.405442	0.168969
DALYs (Disability-Adjusted Life Years)	East Asia	Male	15-39 years	Tobacco	Number	2021	1378.5812733033845	2052.097668053156	817.6271968144467
DALYs (Disability-Adjusted Life Years)	East Asia	Female	15-39 years	Tobacco	Number	2021	8.902654689810847	16.24762503695043	3.967456305237003
DALYs (Disability-Adjusted Life Years)	East Asia	Both	15-39 years	Tobacco	Number	2021	1387.4839279931953	2063.4344980414544	821.1850027662083
DALYs (Disability-Adjusted Life Years)	East Asia	Male	15-39 years	Tobacco	Percent	2021	0.032873770905586	0.0456695645950964	0.0213493272649916
DALYs (Disability-Adjusted Life Years)	East Asia	Female	15-39 years	Tobacco	Percent	2021	0.0006970083670427	0.0012086060930322	0.0003105076996952
DALYs (Disability-Adjusted Life Years)	East Asia	Both	15-39 years	Tobacco	Percent	2021	0.0253415618452182	0.0349241330588249	0.0157777835849485
DALYs (Disability-Adjusted Life Years)	East Asia	Male	15-39 years	Tobacco	Rate	2021	0.549735	0.818312	0.326044
DALYs (Disability-Adjusted Life Years)	East Asia	Female	15-39 years	Tobacco	Rate	2021	0.00389995	0.00711754	0.0017380089799999999
DALYs (Disability-Adjusted Life Years)	East Asia	Both	15-39 years	Tobacco	Rate	2021	0.289634	0.430736	0.17142
DALYs (Disability-Adjusted Life Years)	East Asia	Male	15-39 years	Occupational risks	Number	1990	18.323858297063172	34.27901450272957	4.194791938160561
DALYs (Disability-Adjusted Life Years)	East Asia	Female	15-39 years	Occupational risks	Number	1990	8.203838275993126	15.735317821544122	1.7630688278492288
DALYs (Disability-Adjusted Life Years)	East Asia	Both	15-39 years	Occupational risks	Number	1990	26.52769657305629	49.58503644077436	6.013289218702468
DALYs (Disability-Adjusted Life Years)	East Asia	Male	15-39 years	Occupational risks	Percent	1990	0.0006519100642197	0.0011897254643724	0.0001429084817764
DALYs (Disability-Adjusted Life Years)	East Asia	Female	15-39 years	Occupational risks	Percent	1990	0.0005312326968194	0.0009810871613848	0.0001155168051048
DALYs (Disability-Adjusted Life Years)	East Asia	Both	15-39 years	Occupational risks	Percent	1990	0.0006092474748505	0.0011031795538648	0.0001335111978822
DALYs (Disability-Adjusted Life Years)	East Asia	Male	15-39 years	Occupational risks	Rate	1990	0.0063000329299999994	0.0117857	0.0014422359600000001
DALYs (Disability-Adjusted Life Years)	East Asia	Female	15-39 years	Occupational risks	Rate	1990	0.0029848103599999995	0.005725	0.000641459
DALYs (Disability-Adjusted Life Years)	East Asia	Both	15-39 years	Occupational risks	Rate	1990	0.00468931	0.00876516	0.00106297
DALYs (Disability-Adjusted Life Years)	East Asia	Male	15-39 years	Occupational risks	Number	1991	19.284838011541066	36.51034079932177	4.172690696638043
DALYs (Disability-Adjusted Life Years)	East Asia	Female	15-39 years	Occupational risks	Number	1991	8.58899325728864	17.166231021900124	1.807964078790968
DALYs (Disability-Adjusted Life Years)	East Asia	Both	15-39 years	Occupational risks	Number	1991	27.87383126882968	52.36571865232776	6.114852317374572
DALYs (Disability-Adjusted Life Years)	East Asia	Male	15-39 years	Occupational risks	Percent	1991	0.0006748660849746	0.0012306434725624	0.0001473401552107
DALYs (Disability-Adjusted Life Years)	East Asia	Female	15-39 years	Occupational risks	Percent	1991	0.000553152149297	0.0010193036707108	0.0001198562616891
DALYs (Disability-Adjusted Life Years)	East Asia	Both	15-39 years	Occupational risks	Percent	1991	0.0006320142565169	0.0011386807904775	0.000137974056373
DALYs (Disability-Adjusted Life Years)	East Asia	Male	15-39 years	Occupational risks	Rate	1991	0.00657306	0.0124442	0.00142222
DALYs (Disability-Adjusted Life Years)	East Asia	Female	15-39 years	Occupational risks	Rate	1991	0.00310677	0.00620928	0.000653968
DALYs (Disability-Adjusted Life Years)	East Asia	Both	15-39 years	Occupational risks	Rate	1991	0.00489141	0.00918934	0.00107306
DALYs (Disability-Adjusted Life Years)	East Asia	Male	15-39 years	Occupational risks	Number	1992	19.447585733450417	36.54844061588369	4.158831275729995
DALYs (Disability-Adjusted Life Years)	East Asia	Female	15-39 years	Occupational risks	Number	1992	8.599582770379376	16.6955915368956	1.8615801147037865
DALYs (Disability-Adjusted Life Years)	East Asia	Both	15-39 years	Occupational risks	Number	1992	28.047168503829788	52.45660792334071	5.907954681624808
DALYs (Disability-Adjusted Life Years)	East Asia	Male	15-39 years	Occupational risks	Percent	1992	0.0006948496280358	0.0012683664966931	0.0001502407502296
DALYs (Disability-Adjusted Life Years)	East Asia	Female	15-39 years	Occupational risks	Percent	1992	0.0005729193820132	0.0010658649506926	0.0001257613525822
DALYs (Disability-Adjusted Life Years)	East Asia	Both	15-39 years	Occupational risks	Percent	1992	0.0006523364021724	0.0011917652480364	0.0001418613770561
DALYs (Disability-Adjusted Life Years)	East Asia	Male	15-39 years	Occupational risks	Rate	1992	0.0066014	0.0124062	0.0014116971899999998
DALYs (Disability-Adjusted Life Years)	East Asia	Female	15-39 years	Occupational risks	Rate	1992	0.00310543	0.006029	0.0006722417399999999
DALYs (Disability-Adjusted Life Years)	East Asia	Both	15-39 years	Occupational risks	Rate	1992	0.0049074761199999995	0.00917845	0.00103373
DALYs (Disability-Adjusted Life Years)	East Asia	Male	15-39 years	Occupational risks	Number	1993	19.26633687222606	35.95372191009975	4.319002332798718
DALYs (Disability-Adjusted Life Years)	East Asia	Female	15-39 years	Occupational risks	Number	1993	8.477585180105052	16.5688529109734	1.8232457992525573
DALYs (Disability-Adjusted Life Years)	East Asia	Both	15-39 years	Occupational risks	Number	1993	27.743922052331115	51.53853675134181	6.121694335178919
DALYs (Disability-Adjusted Life Years)	East Asia	Male	15-39 years	Occupational risks	Percent	1993	0.000706164251711	0.0012878511246951	0.0001530633650314
DALYs (Disability-Adjusted Life Years)	East Asia	Female	15-39 years	Occupational risks	Percent	1993	0.000587804933231	0.0010885241497693	0.0001296976402015
DALYs (Disability-Adjusted Life Years)	East Asia	Both	15-39 years	Occupational risks	Percent	1993	0.0006652906174053	0.0012167837379542	0.0001452246682288
DALYs (Disability-Adjusted Life Years)	East Asia	Male	15-39 years	Occupational risks	Rate	1993	0.006542539270000001	0.012209307830000002	0.00146666
DALYs (Disability-Adjusted Life Years)	East Asia	Female	15-39 years	Occupational risks	Rate	1993	0.0030671386500000005	0.00599451	0.000659639
DALYs (Disability-Adjusted Life Years)	East Asia	Both	15-39 years	Occupational risks	Rate	1993	0.0048598652200000005	0.009027935630000001	0.00107233
DALYs (Disability-Adjusted Life Years)	East Asia	Male	15-39 years	Occupational risks	Number	1994	18.477876155492147	34.405837457412694	4.047300154540169
DALYs (Disability-Adjusted Life Years)	East Asia	Female	15-39 years	Occupational risks	Number	1994	8.205809749446631	15.791020898485025	1.8142596106358095
DALYs (Disability-Adjusted Life Years)	East Asia	Both	15-39 years	Occupational risks	Number	1994	26.68368590493875	49.43158636209394	5.831236871527636
DALYs (Disability-Adjusted Life Years)	East Asia	Male	15-39 years	Occupational risks	Percent	1994	0.0007129203362921	0.0013122272911561	0.0001549196225412
DALYs (Disability-Adjusted Life Years)	East Asia	Female	15-39 years	Occupational risks	Percent	1994	0.0006025636132134	0.0011129874052953	0.0001338755984432
DALYs (Disability-Adjusted Life Years)	East Asia	Both	15-39 years	Occupational risks	Percent	1994	0.000674907318203	0.001233463641608	0.0001471408581198
DALYs (Disability-Adjusted Life Years)	East Asia	Male	15-39 years	Occupational risks	Rate	1994	0.0062983860099999995	0.0117276	0.00137957
DALYs (Disability-Adjusted Life Years)	East Asia	Female	15-39 years	Occupational risks	Rate	1994	0.0029805525600000004	0.00573569	0.000658984
DALYs (Disability-Adjusted Life Years)	East Asia	Both	15-39 years	Occupational risks	Rate	1994	0.00469216	0.00869224	0.00102539
DALYs (Disability-Adjusted Life Years)	East Asia	Male	15-39 years	Occupational risks	Number	1995	17.851910134653185	33.081905566430066	3.8008601707078182
DALYs (Disability-Adjusted Life Years)	East Asia	Female	15-39 years	Occupational risks	Number	1995	8.246967141064065	16.37204364646176	1.7742960173008624
DALYs (Disability-Adjusted Life Years)	East Asia	Both	15-39 years	Occupational risks	Number	1995	26.09887727571725	49.19446269352274	5.489620526783013
DALYs (Disability-Adjusted Life Years)	East Asia	Male	15-39 years	Occupational risks	Percent	1995	0.0007207199524487	0.0013287487759769	0.000156779416148
DALYs (Disability-Adjusted Life Years)	East Asia	Female	15-39 years	Occupational risks	Percent	1995	0.0006248616744464	0.0011587322509938	0.0001378966844753
DALYs (Disability-Adjusted Life Years)	East Asia	Both	15-39 years	Occupational risks	Percent	1995	0.000687387083173	0.0012577894946806	0.0001494643944459
DALYs (Disability-Adjusted Life Years)	East Asia	Male	15-39 years	Occupational risks	Rate	1995	0.00611899	0.0113393	0.0013028
DALYs (Disability-Adjusted Life Years)	East Asia	Female	15-39 years	Occupational risks	Rate	1995	0.00300907	0.00597367	0.000647388
DALYs (Disability-Adjusted Life Years)	East Asia	Both	15-39 years	Occupational risks	Rate	1995	0.00461261	0.00869443	0.000970213
DALYs (Disability-Adjusted Life Years)	East Asia	Male	15-39 years	Occupational risks	Number	1996	18.24510542493003	34.32579338280739	4.121871499859486
DALYs (Disability-Adjusted Life Years)	East Asia	Female	15-39 years	Occupational risks	Number	1996	8.324945330764125	15.395902424331757	1.9468024616723516
DALYs (Disability-Adjusted Life Years)	East Asia	Both	15-39 years	Occupational risks	Number	1996	26.57005075569414	49.98417218448108	5.874494117423351
DALYs (Disability-Adjusted Life Years)	East Asia	Male	15-39 years	Occupational risks	Percent	1996	0.0007342175301541	0.0013524266715943	0.0001591091324055
DALYs (Disability-Adjusted Life Years)	East Asia	Female	15-39 years	Occupational risks	Percent	1996	0.0006483700004834	0.001198043381202	0.0001433047506551
DALYs (Disability-Adjusted Life Years)	East Asia	Both	15-39 years	Occupational risks	Percent	1996	0.000704946701138	0.0012881760429808	0.0001529032519663
DALYs (Disability-Adjusted Life Years)	East Asia	Male	15-39 years	Occupational risks	Rate	1996	0.0062897	0.011833250799999999	0.00142095
DALYs (Disability-Adjusted Life Years)	East Asia	Female	15-39 years	Occupational risks	Rate	1996	0.00304864	0.00563807	0.000712931
DALYs (Disability-Adjusted Life Years)	East Asia	Both	15-39 years	Occupational risks	Rate	1996	0.00471812	0.00887583	0.00104315
DALYs (Disability-Adjusted Life Years)	East Asia	Male	15-39 years	Occupational risks	Number	1997	19.23279050372619	36.75468666033109	4.132056761842808
DALYs (Disability-Adjusted Life Years)	East Asia	Female	15-39 years	Occupational risks	Number	1997	8.530638389756335	16.727538478272052	1.7476220382448928
DALYs (Disability-Adjusted Life Years)	East Asia	Both	15-39 years	Occupational risks	Number	1997	27.763428893482505	53.14574565260023	5.890606142088728
DALYs (Disability-Adjusted Life Years)	East Asia	Male	15-39 years	Occupational risks	Percent	1997	0.0007526683882522	0.0013767664826211	0.0001633175246891
DALYs (Disability-Adjusted Life Years)	East Asia	Female	15-39 years	Occupational risks	Percent	1997	0.0006686417026969	0.0012233584526375	0.0001456143581505
DALYs (Disability-Adjusted Life Years)	East Asia	Both	15-39 years	Occupational risks	Percent	1997	0.0007246845761995	0.0013256292004784	0.000157258764077
DALYs (Disability-Adjusted Life Years)	East Asia	Male	15-39 years	Occupational risks	Rate	1997	0.00665346	0.012715051290000001	0.00142946
DALYs (Disability-Adjusted Life Years)	East Asia	Female	15-39 years	Occupational risks	Rate	1997	0.0031260758199999996	0.00612985	0.0006404208900000001
DALYs (Disability-Adjusted Life Years)	East Asia	Both	15-39 years	Occupational risks	Rate	1997	0.00494054	0.00945737	0.00104824
DALYs (Disability-Adjusted Life Years)	East Asia	Male	15-39 years	Occupational risks	Number	1998	19.73249833165049	37.2565091237923	4.29544352061005
DALYs (Disability-Adjusted Life Years)	East Asia	Female	15-39 years	Occupational risks	Number	1998	8.98269115842707	16.556927004354627	1.9506985337434588
DALYs (Disability-Adjusted Life Years)	East Asia	Both	15-39 years	Occupational risks	Number	1998	28.715189490077584	54.18338166742397	6.283565196361042
DALYs (Disability-Adjusted Life Years)	East Asia	Male	15-39 years	Occupational risks	Percent	1998	0.0007689332755437	0.0014035606801869	0.0001658962103286
DALYs (Disability-Adjusted Life Years)	East Asia	Female	15-39 years	Occupational risks	Percent	1998	0.0006877482060746	0.0012621774113767	0.0001487795074579
DALYs (Disability-Adjusted Life Years)	East Asia	Both	15-39 years	Occupational risks	Percent	1998	0.0007415367514599	0.0013548038400518	0.000159305881724
DALYs (Disability-Adjusted Life Years)	East Asia	Male	15-39 years	Occupational risks	Rate	1998	0.00681721	0.0128714	0.0014839954399999999
DALYs (Disability-Adjusted Life Years)	East Asia	Female	15-39 years	Occupational risks	Rate	1998	0.0032764232099999997	0.00603911	0.000711514
DALYs (Disability-Adjusted Life Years)	East Asia	Both	15-39 years	Occupational risks	Rate	1998	0.00509484	0.00961358	0.00111487
DALYs (Disability-Adjusted Life Years)	East Asia	Male	15-39 years	Occupational risks	Number	1999	20.887905822168467	38.95798640206439	4.542251341959112
DALYs (Disability-Adjusted Life Years)	East Asia	Female	15-39 years	Occupational risks	Number	1999	9.676332239046038	18.857926741042878	2.1213656141945743
DALYs (Disability-Adjusted Life Years)	East Asia	Both	15-39 years	Occupational risks	Number	1999	30.56423806121448	57.33121965761508	6.516032149546973
DALYs (Disability-Adjusted Life Years)	East Asia	Male	15-39 years	Occupational risks	Percent	1999	0.0007839534985032	0.0014386401586421	0.0001686612863962
DALYs (Disability-Adjusted Life Years)	East Asia	Female	15-39 years	Occupational risks	Percent	1999	0.0007063021132424	0.0012935620446553	0.0001518456875722
DALYs (Disability-Adjusted Life Years)	East Asia	Both	15-39 years	Occupational risks	Percent	1999	0.0007576056122795	0.0013850262298276	0.0001627603445552
DALYs (Disability-Adjusted Life Years)	East Asia	Male	15-39 years	Occupational risks	Rate	1999	0.007173102850000001	0.0133785	0.00155985
DALYs (Disability-Adjusted Life Years)	East Asia	Female	15-39 years	Occupational risks	Rate	1999	0.00349601	0.0068132837299999995	0.00076644
DALYs (Disability-Adjusted Life Years)	East Asia	Both	15-39 years	Occupational risks	Rate	1999	0.00538122	0.0100939	0.00114723
DALYs (Disability-Adjusted Life Years)	East Asia	Male	15-39 years	Occupational risks	Number	2000	23.29612302910855	44.53372304728127	4.774026770878435
DALYs (Disability-Adjusted Life Years)	East Asia	Female	15-39 years	Occupational risks	Number	2000	10.559043719442872	20.038927594819658	2.2957400444410663
DALYs (Disability-Adjusted Life Years)	East Asia	Both	15-39 years	Occupational risks	Number	2000	33.85516674855144	63.87339253241886	7.077713593390666
DALYs (Disability-Adjusted Life Years)	East Asia	Male	15-39 years	Occupational risks	Percent	2000	0.000800640008664	0.0014726148725526	0.0001718605984358
DALYs (Disability-Adjusted Life Years)	East Asia	Female	15-39 years	Occupational risks	Percent	2000	0.0007234190149822	0.0013421833411001	0.0001551467140887
DALYs (Disability-Adjusted Life Years)	East Asia	Both	15-39 years	Occupational risks	Percent	2000	0.0007749097047385	0.0014209498053227	0.0001656296420534
DALYs (Disability-Adjusted Life Years)	East Asia	Male	15-39 years	Occupational risks	Rate	2000	0.00792764	0.0151548	0.00162459
DALYs (Disability-Adjusted Life Years)	East Asia	Female	15-39 years	Occupational risks	Rate	2000	0.00376766	0.00715025	0.000819162
DALYs (Disability-Adjusted Life Years)	East Asia	Both	15-39 years	Occupational risks	Rate	2000	0.005896938060000001	0.0111256	0.0012328055899999998
DALYs (Disability-Adjusted Life Years)	East Asia	Male	15-39 years	Occupational risks	Number	2001	25.84893022597564	49.14247854361509	5.390599900364304
DALYs (Disability-Adjusted Life Years)	East Asia	Female	15-39 years	Occupational risks	Number	2001	11.600973362248531	21.829621435915964	2.38685701116271
DALYs (Disability-Adjusted Life Years)	East Asia	Both	15-39 years	Occupational risks	Number	2001	37.44990358822414	70.50925089755535	7.70781840194442
DALYs (Disability-Adjusted Life Years)	East Asia	Male	15-39 years	Occupational risks	Percent	2001	0.0008199711650297	0.0015089237514048	0.0001759263672916
DALYs (Disability-Adjusted Life Years)	East Asia	Female	15-39 years	Occupational risks	Percent	2001	0.0007417952285173	0.0013721825147042	0.0001586649385659
DALYs (Disability-Adjusted Life Years)	East Asia	Both	15-39 years	Occupational risks	Percent	2001	0.0007940521087938	0.0014492248720694	0.0001693732376181
DALYs (Disability-Adjusted Life Years)	East Asia	Male	15-39 years	Occupational risks	Rate	2001	0.00870858	0.016556240320000002	0.00181611
DALYs (Disability-Adjusted Life Years)	East Asia	Female	15-39 years	Occupational risks	Rate	2001	0.00408625	0.00768913	0.000840731
DALYs (Disability-Adjusted Life Years)	East Asia	Both	15-39 years	Occupational risks	Rate	2001	0.00644883	0.0121416	0.00132728
DALYs (Disability-Adjusted Life Years)	East Asia	Male	15-39 years	Occupational risks	Number	2002	29.214357254890658	55.73240923433488	6.122540044630686
DALYs (Disability-Adjusted Life Years)	East Asia	Female	15-39 years	Occupational risks	Number	2002	12.480217314936503	23.90170726416916	2.6160676789709125
DALYs (Disability-Adjusted Life Years)	East Asia	Both	15-39 years	Occupational risks	Number	2002	41.694574569827125	79.4625904836872	8.681481924820424
DALYs (Disability-Adjusted Life Years)	East Asia	Male	15-39 years	Occupational risks	Percent	2002	0.0008423305816989	0.001534083327853	0.0001818283538755
DALYs (Disability-Adjusted Life Years)	East Asia	Female	15-39 years	Occupational risks	Percent	2002	0.0007599888603941	0.0014157829079427	0.0001621300322482
DALYs (Disability-Adjusted Life Years)	East Asia	Both	15-39 years	Occupational risks	Percent	2002	0.0008158652170059	0.0014823516177923	0.0001741275335929
DALYs (Disability-Adjusted Life Years)	East Asia	Male	15-39 years	Occupational risks	Rate	2002	0.00976346	0.0186258	0.00204616
DALYs (Disability-Adjusted Life Years)	East Asia	Female	15-39 years	Occupational risks	Rate	2002	0.00434976	0.00833053	0.000911785
DALYs (Disability-Adjusted Life Years)	East Asia	Both	15-39 years	Occupational risks	Rate	2002	0.00711343	0.013557	0.00148113
DALYs (Disability-Adjusted Life Years)	East Asia	Male	15-39 years	Occupational risks	Number	2003	32.420582280154754	59.41674390981186	7.035319998885852
DALYs (Disability-Adjusted Life Years)	East Asia	Female	15-39 years	Occupational risks	Number	2003	12.987744450746057	24.7637840687671	2.7875477901386736
DALYs (Disability-Adjusted Life Years)	East Asia	Both	15-39 years	Occupational risks	Number	2003	45.40832673090081	84.67498597673844	10.034496944658112
DALYs (Disability-Adjusted Life Years)	East Asia	Male	15-39 years	Occupational risks	Percent	2003	0.0008546804888144	0.0015517028476613	0.0001844371961452
DALYs (Disability-Adjusted Life Years)	East Asia	Female	15-39 years	Occupational risks	Percent	2003	0.0007706117274173	0.0014328512120818	0.0001632625323788
DALYs (Disability-Adjusted Life Years)	East Asia	Both	15-39 years	Occupational risks	Percent	2003	0.0008288940611541	0.0015100811627773	0.0001766158208378
DALYs (Disability-Adjusted Life Years)	East Asia	Male	15-39 years	Occupational risks	Rate	2003	0.0107873	0.019769748450000003	0.00234086
DALYs (Disability-Adjusted Life Years)	East Asia	Female	15-39 years	Occupational risks	Rate	2003	0.00449749	0.008575391319999999	0.000965293
DALYs (Disability-Adjusted Life Years)	East Asia	Both	15-39 years	Occupational risks	Rate	2003	0.0077051933000000005	0.0143682	0.0017027216000000001
DALYs (Disability-Adjusted Life Years)	East Asia	Male	15-39 years	Occupational risks	Number	2004	33.402798225916655	63.76318251188818	7.215202356385031
DALYs (Disability-Adjusted Life Years)	East Asia	Female	15-39 years	Occupational risks	Number	2004	13.205501631039462	24.54697828093751	2.885621960579619
DALYs (Disability-Adjusted Life Years)	East Asia	Both	15-39 years	Occupational risks	Number	2004	46.6082998569561	88.20550902566066	10.18784076775663
DALYs (Disability-Adjusted Life Years)	East Asia	Male	15-39 years	Occupational risks	Percent	2004	0.0008628786085787	0.0015620218452301	0.0001863714175656
DALYs (Disability-Adjusted Life Years)	East Asia	Female	15-39 years	Occupational risks	Percent	2004	0.0007798821076618	0.0014498478908292	0.0001653925525669
DALYs (Disability-Adjusted Life Years)	East Asia	Both	15-39 years	Occupational risks	Percent	2004	0.0008376392237146	0.0015251856845942	0.0001801173277825
DALYs (Disability-Adjusted Life Years)	East Asia	Male	15-39 years	Occupational risks	Rate	2004	0.0110946	0.0211787	0.00239651
DALYs (Disability-Adjusted Life Years)	East Asia	Female	15-39 years	Occupational risks	Rate	2004	0.00455686	0.008470491319999999	0.000995749
DALYs (Disability-Adjusted Life Years)	East Asia	Both	15-39 years	Occupational risks	Rate	2004	0.007888137429999999	0.014928181879999999	0.0017242226900000001
DALYs (Disability-Adjusted Life Years)	East Asia	Male	15-39 years	Occupational risks	Number	2005	33.42197204360146	61.21893748829384	7.1692022459522144
DALYs (Disability-Adjusted Life Years)	East Asia	Female	15-39 years	Occupational risks	Number	2005	13.067104162677918	24.30787440428755	2.8228244900973465
DALYs (Disability-Adjusted Life Years)	East Asia	Both	15-39 years	Occupational risks	Number	2005	46.48907620627943	86.17811647202612	9.992062570086569
DALYs (Disability-Adjusted Life Years)	East Asia	Male	15-39 years	Occupational risks	Percent	2005	0.0008710766175213	0.001580056207361	0.0001881043133335
DALYs (Disability-Adjusted Life Years)	East Asia	Female	15-39 years	Occupational risks	Percent	2005	0.0007888068423166	0.0014737370974949	0.000166913513788
DALYs (Disability-Adjusted Life Years)	East Asia	Both	15-39 years	Occupational risks	Percent	2005	0.0008462898616449	0.0015477700782373	0.0001814124285866
DALYs (Disability-Adjusted Life Years)	East Asia	Male	15-39 years	Occupational risks	Rate	2005	0.0111106	0.0203513	0.00238329
DALYs (Disability-Adjusted Life Years)	East Asia	Female	15-39 years	Occupational risks	Rate	2005	0.00450665	0.00838343	0.000973551
DALYs (Disability-Adjusted Life Years)	East Asia	Both	15-39 years	Occupational risks	Rate	2005	0.00786933	0.0145876	0.00169138
DALYs (Disability-Adjusted Life Years)	East Asia	Male	15-39 years	Occupational risks	Number	2006	32.92865028835422	62.36971928452611	7.222714463118123
DALYs (Disability-Adjusted Life Years)	East Asia	Female	15-39 years	Occupational risks	Number	2006	12.642334971807209	24.1236107378714	2.604871156312348
DALYs (Disability-Adjusted Life Years)	East Asia	Both	15-39 years	Occupational risks	Number	2006	45.57098526016143	85.28337616001707	9.903167169465828
DALYs (Disability-Adjusted Life Years)	East Asia	Male	15-39 years	Occupational risks	Percent	2006	0.0008775498857661	0.0015990664469913	0.0001898674147951
DALYs (Disability-Adjusted Life Years)	East Asia	Female	15-39 years	Occupational risks	Percent	2006	0.000796259214273	0.0014804686512882	0.0001678362777409
DALYs (Disability-Adjusted Life Years)	East Asia	Both	15-39 years	Occupational risks	Percent	2006	0.0008533933270781	0.0015576613076114	0.0001825289872141
DALYs (Disability-Adjusted Life Years)	East Asia	Male	15-39 years	Occupational risks	Rate	2006	0.0109939	0.0208234	0.0024114511000000003
DALYs (Disability-Adjusted Life Years)	East Asia	Female	15-39 years	Occupational risks	Rate	2006	0.00437585	0.00834983	0.000901616
DALYs (Disability-Adjusted Life Years)	East Asia	Both	15-39 years	Occupational risks	Rate	2006	0.00774452	0.014493407299999999	0.0016829849099999998
DALYs (Disability-Adjusted Life Years)	East Asia	Male	15-39 years	Occupational risks	Number	2007	32.966089842063056	60.96037093614025	7.79765430452653
DALYs (Disability-Adjusted Life Years)	East Asia	Female	15-39 years	Occupational risks	Number	2007	12.3406635436146	23.83878993797513	2.7047156913078814
DALYs (Disability-Adjusted Life Years)	East Asia	Both	15-39 years	Occupational risks	Number	2007	45.30675338567766	83.17402796735949	10.370639734289302
DALYs (Disability-Adjusted Life Years)	East Asia	Male	15-39 years	Occupational risks	Percent	2007	0.0008817345118059	0.0015996578780574	0.0001922647431414
DALYs (Disability-Adjusted Life Years)	East Asia	Female	15-39 years	Occupational risks	Percent	2007	0.0008020288317306	0.0014869696504291	0.0001696448404521
DALYs (Disability-Adjusted Life Years)	East Asia	Both	15-39 years	Occupational risks	Percent	2007	0.0008585512977419	0.0015748483325507	0.0001849557585118
DALYs (Disability-Adjusted Life Years)	East Asia	Male	15-39 years	Occupational risks	Rate	2007	0.011089805389999999	0.0205071	0.00262313
DALYs (Disability-Adjusted Life Years)	East Asia	Female	15-39 years	Occupational risks	Rate	2007	0.00430127	0.008308872180000001	0.0009427129900000001
DALYs (Disability-Adjusted Life Years)	East Asia	Both	15-39 years	Occupational risks	Rate	2007	0.00775571	0.014237923290000001	0.00177527
DALYs (Disability-Adjusted Life Years)	East Asia	Male	15-39 years	Occupational risks	Number	2008	32.810633757738465	61.86589547233314	7.055537281765368
DALYs (Disability-Adjusted Life Years)	East Asia	Female	15-39 years	Occupational risks	Number	2008	12.255905433232403	22.689523684578926	2.636879090655378
DALYs (Disability-Adjusted Life Years)	East Asia	Both	15-39 years	Occupational risks	Number	2008	45.0665391909709	83.83022954044068	9.674222255505274
DALYs (Disability-Adjusted Life Years)	East Asia	Male	15-39 years	Occupational risks	Percent	2008	0.0008810154003104	0.0016127791043577	0.0001927516637671
DALYs (Disability-Adjusted Life Years)	East Asia	Female	15-39 years	Occupational risks	Percent	2008	0.0007972233775966	0.0014806992978894	0.0001681203452877
DALYs (Disability-Adjusted Life Years)	East Asia	Both	15-39 years	Occupational risks	Percent	2008	0.0008566199676408	0.0015703172642851	0.0001844945824309
DALYs (Disability-Adjusted Life Years)	East Asia	Male	15-39 years	Occupational risks	Rate	2008	0.0111455	0.0210152	0.0023967
DALYs (Disability-Adjusted Life Years)	East Asia	Female	15-39 years	Occupational risks	Rate	2008	0.00431134	0.00798164	0.0009275914999999999
DALYs (Disability-Adjusted Life Years)	East Asia	Both	15-39 years	Occupational risks	Rate	2008	0.007788121739999999	0.014487	0.00167184
DALYs (Disability-Adjusted Life Years)	East Asia	Male	15-39 years	Occupational risks	Number	2009	33.533444704517244	62.42678878068962	7.320114452432089
DALYs (Disability-Adjusted Life Years)	East Asia	Female	15-39 years	Occupational risks	Number	2009	12.650571070624167	23.618892660630173	2.723587555436646
DALYs (Disability-Adjusted Life Years)	East Asia	Both	15-39 years	Occupational risks	Number	2009	46.18401577514141	85.11628738627303	10.185041056984122
DALYs (Disability-Adjusted Life Years)	East Asia	Male	15-39 years	Occupational risks	Percent	2009	0.0008777408214539	0.00161618810054	0.0001937064282684
DALYs (Disability-Adjusted Life Years)	East Asia	Female	15-39 years	Occupational risks	Percent	2009	0.0008003225340738	0.0014799617053957	0.0001685919457385
DALYs (Disability-Adjusted Life Years)	East Asia	Both	15-39 years	Occupational risks	Percent	2009	0.0008551532194477	0.0015751445902924	0.0001858238287269
DALYs (Disability-Adjusted Life Years)	East Asia	Male	15-39 years	Occupational risks	Rate	2009	0.0115221	0.0214499	0.0025152
DALYs (Disability-Adjusted Life Years)	East Asia	Female	15-39 years	Occupational risks	Rate	2009	0.00449955	0.00840075	0.0009687237400000001
DALYs (Disability-Adjusted Life Years)	East Asia	Both	15-39 years	Occupational risks	Rate	2009	0.00807149	0.014875604570000001	0.0017800194100000002
DALYs (Disability-Adjusted Life Years)	East Asia	Male	15-39 years	Occupational risks	Number	2010	33.9996683470964	62.302990418673886	7.293955054129872
DALYs (Disability-Adjusted Life Years)	East Asia	Female	15-39 years	Occupational risks	Number	2010	12.707984108649478	23.51951161933896	2.6425364034566776
DALYs (Disability-Adjusted Life Years)	East Asia	Both	15-39 years	Occupational risks	Number	2010	46.70765245574584	87.03312357604435	9.98853521635984
DALYs (Disability-Adjusted Life Years)	East Asia	Male	15-39 years	Occupational risks	Percent	2010	0.0008811429530888	0.0016326369943808	0.000195099190015
DALYs (Disability-Adjusted Life Years)	East Asia	Female	15-39 years	Occupational risks	Percent	2010	0.0008117498717978	0.001503381698103	0.0001701414265716
DALYs (Disability-Adjusted Life Years)	East Asia	Both	15-39 years	Occupational risks	Percent	2010	0.0008611859395222	0.0015831812777048	0.0001880057037392
DALYs (Disability-Adjusted Life Years)	East Asia	Male	15-39 years	Occupational risks	Rate	2010	0.0118368	0.0216905	0.00253936
DALYs (Disability-Adjusted Life Years)	East Asia	Female	15-39 years	Occupational risks	Rate	2010	0.00457918	0.00847498	0.000952207
DALYs (Disability-Adjusted Life Years)	East Asia	Both	15-39 years	Occupational risks	Rate	2010	0.00827046	0.015410837000000002	0.00176866
DALYs (Disability-Adjusted Life Years)	East Asia	Male	15-39 years	Occupational risks	Number	2011	33.278804925788165	63.12998600399352	7.535623837603746
DALYs (Disability-Adjusted Life Years)	East Asia	Female	15-39 years	Occupational risks	Number	2011	12.718562728730664	24.13795083845422	2.697456452195693
DALYs (Disability-Adjusted Life Years)	East Asia	Both	15-39 years	Occupational risks	Number	2011	45.99736765451885	86.51030565082151	10.260513507470217
DALYs (Disability-Adjusted Life Years)	East Asia	Male	15-39 years	Occupational risks	Percent	2011	0.0008797302720793	0.0016228647465801	0.0001955286553397
DALYs (Disability-Adjusted Life Years)	East Asia	Female	15-39 years	Occupational risks	Percent	2011	0.0008204286697511	0.0015252661416762	0.0001709065439925
DALYs (Disability-Adjusted Life Years)	East Asia	Both	15-39 years	Occupational risks	Percent	2011	0.0008626187490289	0.0015926473125101	0.0001887623176851
DALYs (Disability-Adjusted Life Years)	East Asia	Male	15-39 years	Occupational risks	Rate	2011	0.0117624	0.0223133	0.00266347
DALYs (Disability-Adjusted Life Years)	East Asia	Female	15-39 years	Occupational risks	Rate	2011	0.00465474	0.00883401	0.000987216
DALYs (Disability-Adjusted Life Years)	East Asia	Both	15-39 years	Occupational risks	Rate	2011	0.00827047	0.015554825730000001	0.00184487
DALYs (Disability-Adjusted Life Years)	East Asia	Male	15-39 years	Occupational risks	Number	2012	32.183548479113064	60.68942898786144	6.967121561591206
DALYs (Disability-Adjusted Life Years)	East Asia	Female	15-39 years	Occupational risks	Number	2012	12.277575204327247	23.349613535150677	2.5808279262887277
DALYs (Disability-Adjusted Life Years)	East Asia	Both	15-39 years	Occupational risks	Number	2012	44.46112368344027	82.32593830486255	9.480081728847946
DALYs (Disability-Adjusted Life Years)	East Asia	Male	15-39 years	Occupational risks	Percent	2012	0.0008751012875449	0.0016083313640114	0.0001942573765715
DALYs (Disability-Adjusted Life Years)	East Asia	Female	15-39 years	Occupational risks	Percent	2012	0.0008303070816174	0.0015488073255541	0.000172212827982
DALYs (Disability-Adjusted Life Years)	East Asia	Both	15-39 years	Occupational risks	Percent	2012	0.0008623216866883	0.0015897459063823	0.0001883576545138
DALYs (Disability-Adjusted Life Years)	East Asia	Male	15-39 years	Occupational risks	Rate	2012	0.011567395999999999	0.021813	0.00250412
DALYs (Disability-Adjusted Life Years)	East Asia	Female	15-39 years	Occupational risks	Rate	2012	0.00457683	0.00870425	0.000962079
DALYs (Disability-Adjusted Life Years)	East Asia	Both	15-39 years	Occupational risks	Rate	2012	0.00813589	0.015064723129999999	0.00173475
DALYs (Disability-Adjusted Life Years)	East Asia	Male	15-39 years	Occupational risks	Number	2013	31.961511509274096	59.93296869028838	7.057821053255026
DALYs (Disability-Adjusted Life Years)	East Asia	Female	15-39 years	Occupational risks	Number	2013	11.93947056552945	22.277720296630967	2.5469922815401844
DALYs (Disability-Adjusted Life Years)	East Asia	Both	15-39 years	Occupational risks	Number	2013	43.90098207480349	79.9638340547369	9.74854619450032
DALYs (Disability-Adjusted Life Years)	East Asia	Male	15-39 years	Occupational risks	Percent	2013	0.0008724727029922	0.0016044157089778	0.0001939356522425
DALYs (Disability-Adjusted Life Years)	East Asia	Female	15-39 years	Occupational risks	Percent	2013	0.0008426635493463	0.0015798970038115	0.0001762402533913
DALYs (Disability-Adjusted Life Years)	East Asia	Both	15-39 years	Occupational risks	Percent	2013	0.0008641593826697	0.0015873312975388	0.0001890876190483
DALYs (Disability-Adjusted Life Years)	East Asia	Male	15-39 years	Occupational risks	Rate	2013	0.0116897	0.0219201	0.00258135
DALYs (Disability-Adjusted Life Years)	East Asia	Female	15-39 years	Occupational risks	Rate	2013	0.00454374	0.00847812	0.0009692957400000001
DALYs (Disability-Adjusted Life Years)	East Asia	Both	15-39 years	Occupational risks	Rate	2013	0.00818768	0.0149135	0.00181814
DALYs (Disability-Adjusted Life Years)	East Asia	Male	15-39 years	Occupational risks	Number	2014	33.61344239647044	63.073871256326285	7.503420332641057
DALYs (Disability-Adjusted Life Years)	East Asia	Female	15-39 years	Occupational risks	Number	2014	11.702746751216626	22.402251943249944	2.4719166769162584
DALYs (Disability-Adjusted Life Years)	East Asia	Both	15-39 years	Occupational risks	Number	2014	45.316189147687126	84.81295206680178	9.831164786033842
DALYs (Disability-Adjusted Life Years)	East Asia	Male	15-39 years	Occupational risks	Percent	2014	0.0008719300232875	0.0016052469327	0.0001920761027225
DALYs (Disability-Adjusted Life Years)	East Asia	Female	15-39 years	Occupational risks	Percent	2014	0.0008568339528229	0.001590510285847	0.0001793848252677
DALYs (Disability-Adjusted Life Years)	East Asia	Both	15-39 years	Occupational risks	Percent	2014	0.0008679064229812	0.0015879355086768	0.0001887103201726
DALYs (Disability-Adjusted Life Years)	East Asia	Male	15-39 years	Occupational risks	Rate	2014	0.0124989	0.0234535	0.00279009
DALYs (Disability-Adjusted Life Years)	East Asia	Female	15-39 years	Occupational risks	Rate	2014	0.00454962	0.00870921	0.000960994
DALYs (Disability-Adjusted Life Years)	East Asia	Both	15-39 years	Occupational risks	Rate	2014	0.00861269	0.0161194	0.0018684883099999998
DALYs (Disability-Adjusted Life Years)	East Asia	Male	15-39 years	Occupational risks	Number	2015	33.59079965083241	62.777291519960215	7.458019282803043
DALYs (Disability-Adjusted Life Years)	East Asia	Female	15-39 years	Occupational risks	Number	2015	11.448646176630842	21.520936901507326	2.599693424974243
DALYs (Disability-Adjusted Life Years)	East Asia	Both	15-39 years	Occupational risks	Number	2015	45.03944582746327	82.52497963701545	10.213208121075311
DALYs (Disability-Adjusted Life Years)	East Asia	Male	15-39 years	Occupational risks	Percent	2015	0.0008639369327153	0.001590718064977	0.0001888657230948
DALYs (Disability-Adjusted Life Years)	East Asia	Female	15-39 years	Occupational risks	Percent	2015	0.0008695967855052	0.0016121543751289	0.0001828239120352
DALYs (Disability-Adjusted Life Years)	East Asia	Both	15-39 years	Occupational risks	Percent	2015	0.0008653014163967	0.0015783220777713	0.0001872866629939
DALYs (Disability-Adjusted Life Years)	East Asia	Male	15-39 years	Occupational risks	Rate	2015	0.0126725	0.023683435149999998	0.00281362
DALYs (Disability-Adjusted Life Years)	East Asia	Female	15-39 years	Occupational risks	Rate	2015	0.00454282	0.0085395	0.00103156
DALYs (Disability-Adjusted Life Years)	East Asia	Both	15-39 years	Occupational risks	Rate	2015	0.008710263000000001	0.0159597	0.0019751515000000002
DALYs (Disability-Adjusted Life Years)	East Asia	Male	15-39 years	Occupational risks	Number	2016	34.03471411946624	65.66943513527366	7.398647637761522
DALYs (Disability-Adjusted Life Years)	East Asia	Female	15-39 years	Occupational risks	Number	2016	11.590287596211844	21.642181693151574	2.754449433523456
DALYs (Disability-Adjusted Life Years)	East Asia	Both	15-39 years	Occupational risks	Number	2016	45.62500171567808	85.60798902779612	10.136000795132643
DALYs (Disability-Adjusted Life Years)	East Asia	Male	15-39 years	Occupational risks	Percent	2016	0.0008638248730859	0.0015860426568932	0.0001876612262326
DALYs (Disability-Adjusted Life Years)	East Asia	Female	15-39 years	Occupational risks	Percent	2016	0.0008888103518905	0.0016486861894794	0.0001872597254245
DALYs (Disability-Adjusted Life Years)	East Asia	Both	15-39 years	Occupational risks	Percent	2016	0.0008698879534039	0.0015868849423801	0.0001877061207998
DALYs (Disability-Adjusted Life Years)	East Asia	Male	15-39 years	Occupational risks	Rate	2016	0.0129977	0.0250788	0.0028255
DALYs (Disability-Adjusted Life Years)	East Asia	Female	15-39 years	Occupational risks	Rate	2016	0.00468661	0.008751152690000001	0.0011137789999999999
DALYs (Disability-Adjusted Life Years)	East Asia	Both	15-39 years	Occupational risks	Rate	2016	0.00896085	0.0168136	0.00199073
DALYs (Disability-Adjusted Life Years)	East Asia	Male	15-39 years	Occupational risks	Number	2017	35.486130562613766	65.86691743880488	7.873928278810943
DALYs (Disability-Adjusted Life Years)	East Asia	Female	15-39 years	Occupational risks	Number	2017	12.026449968263808	22.778352355007726	2.651102117536781
DALYs (Disability-Adjusted Life Years)	East Asia	Both	15-39 years	Occupational risks	Number	2017	47.51258053087761	86.68410512520106	10.82298729357139
DALYs (Disability-Adjusted Life Years)	East Asia	Male	15-39 years	Occupational risks	Percent	2017	0.0008810161697452	0.0016088889719621	0.0001920838202048
DALYs (Disability-Adjusted Life Years)	East Asia	Female	15-39 years	Occupational risks	Percent	2017	0.0009188332346843	0.0017223293547584	0.0001982697235316
DALYs (Disability-Adjusted Life Years)	East Asia	Both	15-39 years	Occupational risks	Percent	2017	0.0008903941025365	0.0016347858138642	0.0001938071576548
DALYs (Disability-Adjusted Life Years)	East Asia	Male	15-39 years	Occupational risks	Rate	2017	0.0136951	0.0254199	0.0030387679599999996
DALYs (Disability-Adjusted Life Years)	East Asia	Female	15-39 years	Occupational risks	Rate	2017	0.00495002	0.00937544	0.00109118
DALYs (Disability-Adjusted Life Years)	East Asia	Both	15-39 years	Occupational risks	Rate	2017	0.00946327	0.017265219630000002	0.00215566
DALYs (Disability-Adjusted Life Years)	East Asia	Male	15-39 years	Occupational risks	Number	2018	37.151872443531225	68.64318234151045	8.200835907233312
DALYs (Disability-Adjusted Life Years)	East Asia	Female	15-39 years	Occupational risks	Number	2018	12.324849006271188	23.828730729309303	2.7231023011304085
DALYs (Disability-Adjusted Life Years)	East Asia	Both	15-39 years	Occupational risks	Number	2018	49.4767214498024	92.1370963976147	11.416019701499945
DALYs (Disability-Adjusted Life Years)	East Asia	Male	15-39 years	Occupational risks	Percent	2018	0.0008909696927468	0.001637692889589	0.0001938657893329
DALYs (Disability-Adjusted Life Years)	East Asia	Female	15-39 years	Occupational risks	Percent	2018	0.000943408476403	0.0017619218224947	0.0002060829154907
DALYs (Disability-Adjusted Life Years)	East Asia	Both	15-39 years	Occupational risks	Percent	2018	0.0009034472466809	0.0016600660513854	0.0001971941801203
DALYs (Disability-Adjusted Life Years)	East Asia	Male	15-39 years	Occupational risks	Rate	2018	0.0144796	0.0267531	0.0031962
DALYs (Disability-Adjusted Life Years)	East Asia	Female	15-39 years	Occupational risks	Rate	2018	0.00516207	0.00998029	0.00114053
DALYs (Disability-Adjusted Life Years)	East Asia	Both	15-39 years	Occupational risks	Rate	2018	0.00998847	0.0186008	0.00230469
DALYs (Disability-Adjusted Life Years)	East Asia	Male	15-39 years	Occupational risks	Number	2019	38.03053932163639	73.12961287198907	8.545281677097105
DALYs (Disability-Adjusted Life Years)	East Asia	Female	15-39 years	Occupational risks	Number	2019	12.529385336138798	23.20673264559204	2.777463146377353
DALYs (Disability-Adjusted Life Years)	East Asia	Both	15-39 years	Occupational risks	Number	2019	50.55992465777516	96.87213737408038	11.089421087840453
DALYs (Disability-Adjusted Life Years)	East Asia	Male	15-39 years	Occupational risks	Percent	2019	0.0009044192063038	0.0016534058213453	0.0001969239579333
DALYs (Disability-Adjusted Life Years)	East Asia	Female	15-39 years	Occupational risks	Percent	2019	0.000966608052499	0.0018116483616432	0.0002109853707858
DALYs (Disability-Adjusted Life Years)	East Asia	Both	15-39 years	Occupational risks	Percent	2019	0.0009192576969021	0.0016929892441889	0.0002005646960218
DALYs (Disability-Adjusted Life Years)	East Asia	Male	15-39 years	Occupational risks	Rate	2019	0.0149616	0.0287699	0.0033618018000000005
DALYs (Disability-Adjusted Life Years)	East Asia	Female	15-39 years	Occupational risks	Rate	2019	0.0053383304200000006	0.00988757	0.00118338
DALYs (Disability-Adjusted Life Years)	East Asia	Both	15-39 years	Occupational risks	Rate	2019	0.0103417	0.0198146	0.00226827
DALYs (Disability-Adjusted Life Years)	East Asia	Male	15-39 years	Occupational risks	Number	2020	38.11515043566044	74.31176406344355	8.560466511417193
DALYs (Disability-Adjusted Life Years)	East Asia	Female	15-39 years	Occupational risks	Number	2020	12.74495936709294	24.91547920272283	2.765103116178661
DALYs (Disability-Adjusted Life Years)	East Asia	Both	15-39 years	Occupational risks	Number	2020	50.86010980275339	96.44514987752947	11.433348588510654
DALYs (Disability-Adjusted Life Years)	East Asia	Male	15-39 years	Occupational risks	Percent	2020	0.0009199818246686	0.0017021147530869	0.0002022098770473
DALYs (Disability-Adjusted Life Years)	East Asia	Female	15-39 years	Occupational risks	Percent	2020	0.0009877961426494	0.0018641673188993	0.0002167480399867
DALYs (Disability-Adjusted Life Years)	East Asia	Both	15-39 years	Occupational risks	Percent	2020	0.0009363646152406	0.0017318459456593	0.0002063209942338
DALYs (Disability-Adjusted Life Years)	East Asia	Male	15-39 years	Occupational risks	Rate	2020	0.0151152	0.029469536379999998	0.00339479
DALYs (Disability-Adjusted Life Years)	East Asia	Female	15-39 years	Occupational risks	Rate	2020	0.00551503	0.010781497789999999	0.00119652
DALYs (Disability-Adjusted Life Years)	East Asia	Both	15-39 years	Occupational risks	Rate	2020	0.0105244	0.0199572	0.00236588
DALYs (Disability-Adjusted Life Years)	East Asia	Male	15-39 years	Occupational risks	Number	2021	39.24338188273038	76.92047740066971	8.910224714184103
DALYs (Disability-Adjusted Life Years)	East Asia	Female	15-39 years	Occupational risks	Number	2021	12.891519850571571	25.614136089290604	2.679583423280018
DALYs (Disability-Adjusted Life Years)	East Asia	Both	15-39 years	Occupational risks	Number	2021	52.134901733302	97.84504847786135	11.398998033242703
DALYs (Disability-Adjusted Life Years)	East Asia	Male	15-39 years	Occupational risks	Percent	2021	0.0009361017902113	0.0017285504454812	0.0002047933168731
DALYs (Disability-Adjusted Life Years)	East Asia	Female	15-39 years	Occupational risks	Percent	2021	0.0010043942762282	0.0019066208697651	0.000216868577378
DALYs (Disability-Adjusted Life Years)	East Asia	Both	15-39 years	Occupational risks	Percent	2021	0.0009524143939812	0.0017638961869057	0.0002076184529561
DALYs (Disability-Adjusted Life Years)	East Asia	Male	15-39 years	Occupational risks	Rate	2021	0.015649	0.0306735	0.0035531163300000002
DALYs (Disability-Adjusted Life Years)	East Asia	Female	15-39 years	Occupational risks	Rate	2021	0.00564734	0.0112207	0.0011738352500000001
DALYs (Disability-Adjusted Life Years)	East Asia	Both	15-39 years	Occupational risks	Rate	2021	0.010883	0.0204249	0.0023795103900000002
DALYs (Disability-Adjusted Life Years)	East Asia	Male	30-34 years	Tobacco	Number	1990	197.15733295064535	291.4421782235802	118.87909207464048
DALYs (Disability-Adjusted Life Years)	East Asia	Female	30-34 years	Tobacco	Number	1990	2.92933416443678	6.148108222810867	1.2592038980560611
DALYs (Disability-Adjusted Life Years)	East Asia	Both	30-34 years	Tobacco	Number	1990	200.08666711508212	293.7900709398474	120.9425569651589
DALYs (Disability-Adjusted Life Years)	East Asia	Male	30-34 years	Tobacco	Percent	1990	0.0326333733529567	0.0471187722157077	0.0208717510473535
DALYs (Disability-Adjusted Life Years)	East Asia	Female	30-34 years	Tobacco	Percent	1990	0.0008929797027402	0.0017534100158043	0.0003875639078496
DALYs (Disability-Adjusted Life Years)	East Asia	Both	30-34 years	Tobacco	Percent	1990	0.0214761710897051	0.0310952412609887	0.0133736005666525
DALYs (Disability-Adjusted Life Years)	East Asia	Male	30-34 years	Tobacco	Rate	1990	0.413125	0.610691	0.2491
DALYs (Disability-Adjusted Life Years)	East Asia	Female	30-34 years	Tobacco	Rate	1990	0.006673195189999999	0.014005751440000002	0.0028685404000000003
DALYs (Disability-Adjusted Life Years)	East Asia	Both	30-34 years	Tobacco	Rate	1990	0.218387	0.32066	0.13200397446999998
DALYs (Disability-Adjusted Life Years)	East Asia	Male	30-34 years	Tobacco	Number	1991	194.29467171105216	279.7144434869554	116.20608422977494
DALYs (Disability-Adjusted Life Years)	East Asia	Female	30-34 years	Tobacco	Number	1991	3.0188364880566043	6.161579316348895	1.2978474677966794
DALYs (Disability-Adjusted Life Years)	East Asia	Both	30-34 years	Tobacco	Number	1991	197.31350819910864	284.8921973837479	118.63944056320568
DALYs (Disability-Adjusted Life Years)	East Asia	Male	30-34 years	Tobacco	Percent	1991	0.0330242875516286	0.0473137744222621	0.0212128990799197
DALYs (Disability-Adjusted Life Years)	East Asia	Female	30-34 years	Tobacco	Percent	1991	0.0009525971215418	0.0018227415537479	0.0004086281889475
DALYs (Disability-Adjusted Life Years)	East Asia	Both	30-34 years	Tobacco	Percent	1991	0.0218038033384594	0.0305911418758174	0.0130933581173111
DALYs (Disability-Adjusted Life Years)	East Asia	Male	30-34 years	Tobacco	Rate	1991	0.416445	0.599532	0.249073
DALYs (Disability-Adjusted Life Years)	East Asia	Female	30-34 years	Tobacco	Rate	1991	0.00701746	0.0143229	0.0030169208300000003
DALYs (Disability-Adjusted Life Years)	East Asia	Both	30-34 years	Tobacco	Rate	1991	0.22003315550000002	0.317696	0.1323
DALYs (Disability-Adjusted Life Years)	East Asia	Male	30-34 years	Tobacco	Number	1992	187.1049601810785	273.9170011104686	110.92303879808738
DALYs (Disability-Adjusted Life Years)	East Asia	Female	30-34 years	Tobacco	Number	1992	3.0745198519997112	6.096973308539415	1.31172257816754
DALYs (Disability-Adjusted Life Years)	East Asia	Both	30-34 years	Tobacco	Number	1992	190.17948003307836	278.6155589058197	112.81640592784902
DALYs (Disability-Adjusted Life Years)	East Asia	Male	30-34 years	Tobacco	Percent	1992	0.033347560085546	0.0478342247354118	0.0215751114865479
DALYs (Disability-Adjusted Life Years)	East Asia	Female	30-34 years	Tobacco	Percent	1992	0.0010031528072759	0.0019061143389026	0.0004472490797216
DALYs (Disability-Adjusted Life Years)	East Asia	Both	30-34 years	Tobacco	Percent	1992	0.0219306496103226	0.0308590507033679	0.0138002553358764
DALYs (Disability-Adjusted Life Years)	East Asia	Male	30-34 years	Tobacco	Rate	1992	0.394738	0.577887	0.234016
DALYs (Disability-Adjusted Life Years)	East Asia	Female	30-34 years	Tobacco	Rate	1992	0.00700168	0.013884783969999998	0.0029872173799999997
DALYs (Disability-Adjusted Life Years)	East Asia	Both	30-34 years	Tobacco	Rate	1992	0.208277	0.305128	0.123552
DALYs (Disability-Adjusted Life Years)	East Asia	Male	30-34 years	Tobacco	Number	1993	191.7457344035235	273.11739171568854	122.12720964131869
DALYs (Disability-Adjusted Life Years)	East Asia	Female	30-34 years	Tobacco	Number	1993	3.225056940767879	6.236814431731754	1.3978861536707496
DALYs (Disability-Adjusted Life Years)	East Asia	Both	30-34 years	Tobacco	Number	1993	194.97079134429177	279.290114848906	124.57777810148956
DALYs (Disability-Adjusted Life Years)	East Asia	Male	30-34 years	Tobacco	Percent	1993	0.0336511309692775	0.0481937077247602	0.0216594222116418
DALYs (Disability-Adjusted Life Years)	East Asia	Female	30-34 years	Tobacco	Percent	1993	0.0010427108573027	0.0019587166217283	0.0004619744441092
DALYs (Disability-Adjusted Life Years)	East Asia	Both	30-34 years	Tobacco	Percent	1993	0.022211610354044	0.0309510291093035	0.0143071610293273
DALYs (Disability-Adjusted Life Years)	East Asia	Male	30-34 years	Tobacco	Rate	1993	0.379855	0.541056	0.24193855366000003
DALYs (Disability-Adjusted Life Years)	East Asia	Female	30-34 years	Tobacco	Rate	1993	0.006853938499999999	0.0132546	0.00297081
DALYs (Disability-Adjusted Life Years)	East Asia	Both	30-34 years	Tobacco	Rate	1993	0.199903	0.28635543414000003	0.127729
DALYs (Disability-Adjusted Life Years)	East Asia	Male	30-34 years	Tobacco	Number	1994	196.94625291252743	286.5854064650041	125.1282964828942
DALYs (Disability-Adjusted Life Years)	East Asia	Female	30-34 years	Tobacco	Number	1994	3.373867540911457	6.441934403983846	1.390114666363188
DALYs (Disability-Adjusted Life Years)	East Asia	Both	30-34 years	Tobacco	Number	1994	200.3201204534384	292.1400216371942	126.60929193203997
DALYs (Disability-Adjusted Life Years)	East Asia	Male	30-34 years	Tobacco	Percent	1994	0.0338697641737307	0.0480857711760685	0.0219266797626592
DALYs (Disability-Adjusted Life Years)	East Asia	Female	30-34 years	Tobacco	Percent	1994	0.0010715222913063	0.001979226410176	0.0004713856778849
DALYs (Disability-Adjusted Life Years)	East Asia	Both	30-34 years	Tobacco	Percent	1994	0.0223511239118766	0.0312566615432774	0.014607526215986
DALYs (Disability-Adjusted Life Years)	East Asia	Male	30-34 years	Tobacco	Rate	1994	0.359049	0.522468	0.228119
DALYs (Disability-Adjusted Life Years)	East Asia	Female	30-34 years	Tobacco	Rate	1994	0.00656537	0.012535661859999998	0.0027050892400000003
DALYs (Disability-Adjusted Life Years)	East Asia	Both	30-34 years	Tobacco	Rate	1994	0.188552	0.274978	0.119172
DALYs (Disability-Adjusted Life Years)	East Asia	Male	30-34 years	Tobacco	Number	1995	202.8139853188771	287.6975817562128	125.88415560553896
DALYs (Disability-Adjusted Life Years)	East Asia	Female	30-34 years	Tobacco	Number	1995	3.599056605530262	6.906067489496452	1.5102903104062573
DALYs (Disability-Adjusted Life Years)	East Asia	Both	30-34 years	Tobacco	Number	1995	206.4130419244073	292.7668778218116	127.84404801228244
DALYs (Disability-Adjusted Life Years)	East Asia	Male	30-34 years	Tobacco	Percent	1995	0.0339792203088245	0.0482884862339848	0.0218143417758573
DALYs (Disability-Adjusted Life Years)	East Asia	Female	30-34 years	Tobacco	Percent	1995	0.0010832162236518	0.0020603208483497	0.0004743137511005
DALYs (Disability-Adjusted Life Years)	East Asia	Both	30-34 years	Tobacco	Percent	1995	0.0222188499845261	0.0310774196904819	0.0139172410571446
DALYs (Disability-Adjusted Life Years)	East Asia	Male	30-34 years	Tobacco	Rate	1995	0.340749	0.48336251716999995	0.21149876184000002
DALYs (Disability-Adjusted Life Years)	East Asia	Female	30-34 years	Tobacco	Rate	1995	0.00642855	0.0123354	0.00269764
DALYs (Disability-Adjusted Life Years)	East Asia	Both	30-34 years	Tobacco	Rate	1995	0.17870395621000001	0.253466	0.11068213977000001
DALYs (Disability-Adjusted Life Years)	East Asia	Male	30-34 years	Tobacco	Number	1996	217.3790656287913	305.74717134135545	133.4244673042105
DALYs (Disability-Adjusted Life Years)	East Asia	Female	30-34 years	Tobacco	Number	1996	3.7138544483738936	7.0938476266695485	1.611750293900143
DALYs (Disability-Adjusted Life Years)	East Asia	Both	30-34 years	Tobacco	Number	1996	221.09292007716536	310.3086437166064	135.7529711692248
DALYs (Disability-Adjusted Life Years)	East Asia	Male	30-34 years	Tobacco	Percent	1996	0.0339091863499469	0.0479133345579486	0.021687702634343
DALYs (Disability-Adjusted Life Years)	East Asia	Female	30-34 years	Tobacco	Percent	1996	0.0010806925769223	0.0020721300811	0.0004705651375071
DALYs (Disability-Adjusted Life Years)	East Asia	Both	30-34 years	Tobacco	Percent	1996	0.0224491532712849	0.0316642083636617	0.0140140937512061
DALYs (Disability-Adjusted Life Years)	East Asia	Male	30-34 years	Tobacco	Rate	1996	0.341668	0.480561	0.20971123504000003
DALYs (Disability-Adjusted Life Years)	East Asia	Female	30-34 years	Tobacco	Rate	1996	0.00617387	0.011792735589999999	0.00267936
DALYs (Disability-Adjusted Life Years)	East Asia	Both	30-34 years	Tobacco	Rate	1996	0.178621	0.250699	0.10967514710000001
DALYs (Disability-Adjusted Life Years)	East Asia	Male	30-34 years	Tobacco	Number	1997	230.29251499455225	330.7613114669356	142.4167645218697
DALYs (Disability-Adjusted Life Years)	East Asia	Female	30-34 years	Tobacco	Number	1997	3.789574361585458	6.970419148751731	1.666242209820762
DALYs (Disability-Adjusted Life Years)	East Asia	Both	30-34 years	Tobacco	Number	1997	234.08208935613743	335.70800092379307	145.27987453289458
DALYs (Disability-Adjusted Life Years)	East Asia	Male	30-34 years	Tobacco	Percent	1997	0.033605862574524	0.0470434972967046	0.0216195085502969
DALYs (Disability-Adjusted Life Years)	East Asia	Female	30-34 years	Tobacco	Percent	1997	0.0010776130979045	0.0020125034950475	0.0004861755443096
DALYs (Disability-Adjusted Life Years)	East Asia	Both	30-34 years	Tobacco	Percent	1997	0.0225721246284718	0.0316623968484911	0.0142445415859029
DALYs (Disability-Adjusted Life Years)	East Asia	Male	30-34 years	Tobacco	Rate	1997	0.345811	0.496676	0.213855
DALYs (Disability-Adjusted Life Years)	East Asia	Female	30-34 years	Tobacco	Rate	1997	0.00599755	0.0110317	0.00263707
DALYs (Disability-Adjusted Life Years)	East Asia	Both	30-34 years	Tobacco	Rate	1997	0.180368	0.258674	0.111943
DALYs (Disability-Adjusted Life Years)	East Asia	Male	30-34 years	Tobacco	Number	1998	228.5725559359404	325.3220163660859	144.18881019515533
DALYs (Disability-Adjusted Life Years)	East Asia	Female	30-34 years	Tobacco	Number	1998	3.856654721640661	7.362838449067892	1.670283386805445
DALYs (Disability-Adjusted Life Years)	East Asia	Both	30-34 years	Tobacco	Number	1998	232.42921065758088	331.7602032609637	146.0832205836383
DALYs (Disability-Adjusted Life Years)	East Asia	Male	30-34 years	Tobacco	Percent	1998	0.0331107869324647	0.0460268669305935	0.0210938762341664
DALYs (Disability-Adjusted Life Years)	East Asia	Female	30-34 years	Tobacco	Percent	1998	0.0010614275015121	0.0019834055622964	0.0004866707557083
DALYs (Disability-Adjusted Life Years)	East Asia	Both	30-34 years	Tobacco	Percent	1998	0.0220497569249194	0.0306871225075521	0.0138978753524187
DALYs (Disability-Adjusted Life Years)	East Asia	Male	30-34 years	Tobacco	Rate	1998	0.33635952539999997	0.478733	0.212183
DALYs (Disability-Adjusted Life Years)	East Asia	Female	30-34 years	Tobacco	Rate	1998	0.005973631379999999	0.0114044	0.00258713
DALYs (Disability-Adjusted Life Years)	East Asia	Both	30-34 years	Tobacco	Rate	1998	0.175397	0.250355	0.110238
DALYs (Disability-Adjusted Life Years)	East Asia	Male	30-34 years	Tobacco	Number	1999	232.42041561999216	325.13764640451154	146.08971304484228
DALYs (Disability-Adjusted Life Years)	East Asia	Female	30-34 years	Tobacco	Number	1999	3.951735189792208	7.198543453000843	1.7720546943796451
DALYs (Disability-Adjusted Life Years)	East Asia	Both	30-34 years	Tobacco	Number	1999	236.3721508097844	332.5115035858426	148.50671895624004
DALYs (Disability-Adjusted Life Years)	East Asia	Male	30-34 years	Tobacco	Percent	1999	0.032594631392009	0.0452845756922505	0.0207373447153671
DALYs (Disability-Adjusted Life Years)	East Asia	Female	30-34 years	Tobacco	Percent	1999	0.0010490756223168	0.0020031267847248	0.000498116753585
DALYs (Disability-Adjusted Life Years)	East Asia	Both	30-34 years	Tobacco	Percent	1999	0.0216650221096086	0.0297830787659368	0.0137194889529723
DALYs (Disability-Adjusted Life Years)	East Asia	Male	30-34 years	Tobacco	Rate	1999	0.34069711937999997	0.47660812944000003	0.214148
DALYs (Disability-Adjusted Life Years)	East Asia	Female	30-34 years	Tobacco	Rate	1999	0.00609762	0.0111075	0.00273432
DALYs (Disability-Adjusted Life Years)	East Asia	Both	30-34 years	Tobacco	Rate	1999	0.17768753637999998	0.249958	0.11163664136000001
DALYs (Disability-Adjusted Life Years)	East Asia	Male	30-34 years	Tobacco	Number	2000	247.96486141042072	348.49405304190725	157.29018912712328
DALYs (Disability-Adjusted Life Years)	East Asia	Female	30-34 years	Tobacco	Number	2000	4.1525091240802405	7.63312991612772	1.8528755235938608
DALYs (Disability-Adjusted Life Years)	East Asia	Both	30-34 years	Tobacco	Number	2000	252.11737053450105	354.8118541207283	158.8261521135723
DALYs (Disability-Adjusted Life Years)	East Asia	Male	30-34 years	Tobacco	Percent	2000	0.0321921606403376	0.0443096408772591	0.0205157429803644
DALYs (Disability-Adjusted Life Years)	East Asia	Female	30-34 years	Tobacco	Percent	2000	0.0010427924353115	0.0019682324977577	0.0004759896246384
DALYs (Disability-Adjusted Life Years)	East Asia	Both	30-34 years	Tobacco	Percent	2000	0.0215619671206599	0.0298123632725991	0.0139227335530062
DALYs (Disability-Adjusted Life Years)	East Asia	Male	30-34 years	Tobacco	Rate	2000	0.365372	0.5135	0.23176445648000002
DALYs (Disability-Adjusted Life Years)	East Asia	Female	30-34 years	Tobacco	Rate	2000	0.006447859980000001	0.0118524	0.0028770754200000003
DALYs (Disability-Adjusted Life Years)	East Asia	Both	30-34 years	Tobacco	Rate	2000	0.190611	0.268253	0.120079
DALYs (Disability-Adjusted Life Years)	East Asia	Male	30-34 years	Tobacco	Number	2001	257.7959964316889	368.2164656312572	161.61967748934927
DALYs (Disability-Adjusted Life Years)	East Asia	Female	30-34 years	Tobacco	Number	2001	4.309039915572677	8.307652445015096	1.93052551766702
DALYs (Disability-Adjusted Life Years)	East Asia	Both	30-34 years	Tobacco	Number	2001	262.1050363472614	375.1254352817583	164.18021038119207
DALYs (Disability-Adjusted Life Years)	East Asia	Male	30-34 years	Tobacco	Percent	2001	0.0318010898850868	0.0432025004012094	0.0205914571838777
DALYs (Disability-Adjusted Life Years)	East Asia	Female	30-34 years	Tobacco	Percent	2001	0.001037434536917	0.0018816058696029	0.0004900921197774
DALYs (Disability-Adjusted Life Years)	East Asia	Both	30-34 years	Tobacco	Percent	2001	0.0213723730591422	0.0295815918160119	0.0136177607495074
DALYs (Disability-Adjusted Life Years)	East Asia	Male	30-34 years	Tobacco	Rate	2001	0.38287	0.546862	0.240032
DALYs (Disability-Adjusted Life Years)	East Asia	Female	30-34 years	Tobacco	Rate	2001	0.006767966540000001	0.0130484	0.0030321678099999995
DALYs (Disability-Adjusted Life Years)	East Asia	Both	30-34 years	Tobacco	Rate	2001	0.20007906973999998	0.28635370451000003	0.125328
DALYs (Disability-Adjusted Life Years)	East Asia	Male	30-34 years	Tobacco	Number	2002	278.2184487079137	398.3438011502196	178.48969636818157
DALYs (Disability-Adjusted Life Years)	East Asia	Female	30-34 years	Tobacco	Number	2002	4.386855308417208	7.822160269344905	2.051009574886255
DALYs (Disability-Adjusted Life Years)	East Asia	Both	30-34 years	Tobacco	Number	2002	282.6053040163307	405.97829990152457	181.0456060001842
DALYs (Disability-Adjusted Life Years)	East Asia	Male	30-34 years	Tobacco	Percent	2002	0.0313844229477188	0.0424461747661961	0.0202439525862384
DALYs (Disability-Adjusted Life Years)	East Asia	Female	30-34 years	Tobacco	Percent	2002	0.0010172083907686	0.0018810831856083	0.000475370085984
DALYs (Disability-Adjusted Life Years)	East Asia	Both	30-34 years	Tobacco	Percent	2002	0.0214265789852537	0.0295854937167682	0.013690859993212
DALYs (Disability-Adjusted Life Years)	East Asia	Male	30-34 years	Tobacco	Rate	2002	0.41759361138999995	0.597896	0.26790515599000003
DALYs (Disability-Adjusted Life Years)	East Asia	Female	30-34 years	Tobacco	Rate	2002	0.006970786850000001	0.0124295	0.0032590886999999996
DALYs (Disability-Adjusted Life Years)	East Asia	Both	30-34 years	Tobacco	Rate	2002	0.218133	0.313361	0.139743
DALYs (Disability-Adjusted Life Years)	East Asia	Male	30-34 years	Tobacco	Number	2003	312.7772625819707	444.7427419431508	189.3960050548095
DALYs (Disability-Adjusted Life Years)	East Asia	Female	30-34 years	Tobacco	Number	2003	4.472748660001983	8.195390673297908	2.104732182031153
DALYs (Disability-Adjusted Life Years)	East Asia	Both	30-34 years	Tobacco	Number	2003	317.2500112419728	451.8777506940851	191.8182224786964
DALYs (Disability-Adjusted Life Years)	East Asia	Male	30-34 years	Tobacco	Percent	2003	0.0309960416698223	0.041818068226909	0.0199951668379878
DALYs (Disability-Adjusted Life Years)	East Asia	Female	30-34 years	Tobacco	Percent	2003	0.0009904716882272	0.0017533915964555	0.0004597992643254
DALYs (Disability-Adjusted Life Years)	East Asia	Both	30-34 years	Tobacco	Percent	2003	0.0216952870210142	0.0295526866148852	0.0137219717017279
DALYs (Disability-Adjusted Life Years)	East Asia	Male	30-34 years	Tobacco	Rate	2003	0.47579828974000005	0.6765448173699999	0.28811
DALYs (Disability-Adjusted Life Years)	East Asia	Female	30-34 years	Tobacco	Rate	2003	0.007183487980000001	0.0131623	0.00338032
DALYs (Disability-Adjusted Life Years)	East Asia	Both	30-34 years	Tobacco	Rate	2003	0.24784834142999998	0.353025	0.149856
DALYs (Disability-Adjusted Life Years)	East Asia	Male	30-34 years	Tobacco	Number	2004	310.95125225478006	440.5697757417458	190.23393569181832
DALYs (Disability-Adjusted Life Years)	East Asia	Female	30-34 years	Tobacco	Number	2004	4.349310971588941	7.965381186584254	1.8926178864125356
DALYs (Disability-Adjusted Life Years)	East Asia	Both	30-34 years	Tobacco	Number	2004	315.30056322636887	447.24034752087977	192.07995257835515
DALYs (Disability-Adjusted Life Years)	East Asia	Male	30-34 years	Tobacco	Percent	2004	0.0306560699712712	0.0414994942847315	0.0197696021812464
DALYs (Disability-Adjusted Life Years)	East Asia	Female	30-34 years	Tobacco	Percent	2004	0.0009722833392413	0.0017166042760151	0.0004431379687416
DALYs (Disability-Adjusted Life Years)	East Asia	Both	30-34 years	Tobacco	Percent	2004	0.021560755874925	0.0295906384564034	0.0136660689681802
DALYs (Disability-Adjusted Life Years)	East Asia	Male	30-34 years	Tobacco	Rate	2004	0.482653	0.683845	0.295278
DALYs (Disability-Adjusted Life Years)	East Asia	Female	30-34 years	Tobacco	Rate	2004	0.00708358	0.012973	0.00308245
DALYs (Disability-Adjusted Life Years)	East Asia	Both	30-34 years	Tobacco	Rate	2004	0.25058611202000003	0.355446	0.152656
DALYs (Disability-Adjusted Life Years)	East Asia	Male	30-34 years	Tobacco	Number	2005	295.59117593615684	418.4350671250164	176.6236880080453
DALYs (Disability-Adjusted Life Years)	East Asia	Female	30-34 years	Tobacco	Number	2005	4.07753233791196	7.516867893413182	1.7834854558781077
DALYs (Disability-Adjusted Life Years)	East Asia	Both	30-34 years	Tobacco	Number	2005	299.6687082740687	426.0598672086789	178.3047926721167
DALYs (Disability-Adjusted Life Years)	East Asia	Male	30-34 years	Tobacco	Percent	2005	0.0304291364571076	0.0410249412109638	0.0195069576876262
DALYs (Disability-Adjusted Life Years)	East Asia	Female	30-34 years	Tobacco	Percent	2005	0.0009672800336065	0.0017097598850526	0.0004160393633202
DALYs (Disability-Adjusted Life Years)	East Asia	Both	30-34 years	Tobacco	Percent	2005	0.0214950837909745	0.0291346185338562	0.0136109064723848
DALYs (Disability-Adjusted Life Years)	East Asia	Male	30-34 years	Tobacco	Rate	2005	0.47252417351000003	0.668899	0.282346
DALYs (Disability-Adjusted Life Years)	East Asia	Female	30-34 years	Tobacco	Rate	2005	0.006790069639999999	0.0125174	0.00296993
DALYs (Disability-Adjusted Life Years)	East Asia	Both	30-34 years	Tobacco	Rate	2005	0.244414	0.3475	0.145428
DALYs (Disability-Adjusted Life Years)	East Asia	Male	30-34 years	Tobacco	Number	2006	273.9167332083746	391.2472903491696	163.82334330453938
DALYs (Disability-Adjusted Life Years)	East Asia	Female	30-34 years	Tobacco	Number	2006	3.651937230377587	6.6707597571910044	1.5996118792918832
DALYs (Disability-Adjusted Life Years)	East Asia	Both	30-34 years	Tobacco	Number	2006	277.56867043875184	396.0218616886182	166.33862492210898
DALYs (Disability-Adjusted Life Years)	East Asia	Male	30-34 years	Tobacco	Percent	2006	0.0303056884331062	0.0410832034377084	0.0193851819506406
DALYs (Disability-Adjusted Life Years)	East Asia	Female	30-34 years	Tobacco	Percent	2006	0.0009509190000281	0.001672562265762	0.0004212509247644
DALYs (Disability-Adjusted Life Years)	East Asia	Both	30-34 years	Tobacco	Percent	2006	0.0215286878394387	0.0291436163297366	0.0131314341999722
DALYs (Disability-Adjusted Life Years)	East Asia	Male	30-34 years	Tobacco	Rate	2006	0.455308	0.650337	0.27231
DALYs (Disability-Adjusted Life Years)	East Asia	Female	30-34 years	Tobacco	Rate	2006	0.00628832	0.0114865	0.00275439
DALYs (Disability-Adjusted Life Years)	East Asia	Both	30-34 years	Tobacco	Rate	2006	0.23475892119000003	0.334943	0.140684
DALYs (Disability-Adjusted Life Years)	East Asia	Male	30-34 years	Tobacco	Number	2007	262.29068013976814	378.4586973565519	152.41118232631186
DALYs (Disability-Adjusted Life Years)	East Asia	Female	30-34 years	Tobacco	Number	2007	3.3142436810800544	5.874292256423134	1.4696613053128589
DALYs (Disability-Adjusted Life Years)	East Asia	Both	30-34 years	Tobacco	Number	2007	265.6049238208483	383.9132800616052	154.1574910918282
DALYs (Disability-Adjusted Life Years)	East Asia	Male	30-34 years	Tobacco	Percent	2007	0.0301805484317675	0.0408567458793362	0.0192761782188121
DALYs (Disability-Adjusted Life Years)	East Asia	Female	30-34 years	Tobacco	Percent	2007	0.0009330205777923	0.0016194858968565	0.0004183609786008
DALYs (Disability-Adjusted Life Years)	East Asia	Both	30-34 years	Tobacco	Percent	2007	0.0216648155074747	0.0298227272930716	0.0136950503703316
DALYs (Disability-Adjusted Life Years)	East Asia	Male	30-34 years	Tobacco	Rate	2007	0.456332	0.6584406755400001	0.265164
DALYs (Disability-Adjusted Life Years)	East Asia	Female	30-34 years	Tobacco	Rate	2007	0.00595543	0.0105556	0.00264086
DALYs (Disability-Adjusted Life Years)	East Asia	Both	30-34 years	Tobacco	Rate	2007	0.234781	0.339359	0.136267
DALYs (Disability-Adjusted Life Years)	East Asia	Male	30-34 years	Tobacco	Number	2008	253.7251778450087	355.5963610837837	148.51810848344886
DALYs (Disability-Adjusted Life Years)	East Asia	Female	30-34 years	Tobacco	Number	2008	3.2738994378791166	5.8365484811202855	1.5061950848225534
DALYs (Disability-Adjusted Life Years)	East Asia	Both	30-34 years	Tobacco	Number	2008	256.999077282888	360.0894155271917	150.0532996227057
DALYs (Disability-Adjusted Life Years)	East Asia	Male	30-34 years	Tobacco	Percent	2008	0.0299253494798258	0.0404417334725548	0.0190226874031622
DALYs (Disability-Adjusted Life Years)	East Asia	Female	30-34 years	Tobacco	Percent	2008	0.000930802156432	0.0016065373890229	0.0004160617172208
DALYs (Disability-Adjusted Life Years)	East Asia	Both	30-34 years	Tobacco	Percent	2008	0.0213998761178487	0.0295904427745147	0.0134632379465154
DALYs (Disability-Adjusted Life Years)	East Asia	Male	30-34 years	Tobacco	Rate	2008	0.461933	0.6474	0.270393
DALYs (Disability-Adjusted Life Years)	East Asia	Female	30-34 years	Tobacco	Rate	2008	0.00615431	0.0109716	0.0028313595400000003
DALYs (Disability-Adjusted Life Years)	East Asia	Both	30-34 years	Tobacco	Rate	2008	0.23769	0.333035	0.138779
DALYs (Disability-Adjusted Life Years)	East Asia	Male	30-34 years	Tobacco	Number	2009	266.01514931941114	375.0183415277319	161.25583974782563
DALYs (Disability-Adjusted Life Years)	East Asia	Female	30-34 years	Tobacco	Number	2009	3.3850650641153672	6.028983598631575	1.5399755646835738
DALYs (Disability-Adjusted Life Years)	East Asia	Both	30-34 years	Tobacco	Number	2009	269.40021438352653	378.8002835087982	163.36042034524968
DALYs (Disability-Adjusted Life Years)	East Asia	Male	30-34 years	Tobacco	Percent	2009	0.0297076743235794	0.0403421420979667	0.0185740341090517
DALYs (Disability-Adjusted Life Years)	East Asia	Female	30-34 years	Tobacco	Percent	2009	0.0009226933178654	0.0015861706253722	0.000416614913104
DALYs (Disability-Adjusted Life Years)	East Asia	Both	30-34 years	Tobacco	Percent	2009	0.0213342705662065	0.0292118971133545	0.0132852956677897
DALYs (Disability-Adjusted Life Years)	East Asia	Male	30-34 years	Tobacco	Rate	2009	0.502492	0.7083941107999999	0.304606
DALYs (Disability-Adjusted Life Years)	East Asia	Female	30-34 years	Tobacco	Rate	2009	0.00661266	0.0117775	0.0030083124299999995
DALYs (Disability-Adjusted Life Years)	East Asia	Both	30-34 years	Tobacco	Rate	2009	0.258716	0.363777	0.156881
DALYs (Disability-Adjusted Life Years)	East Asia	Male	30-34 years	Tobacco	Number	2010	270.7252831230462	381.3948190813856	165.73072670573143
DALYs (Disability-Adjusted Life Years)	East Asia	Female	30-34 years	Tobacco	Number	2010	3.2915626561080247	5.681427957340468	1.4203587012079808
DALYs (Disability-Adjusted Life Years)	East Asia	Both	30-34 years	Tobacco	Number	2010	274.0168457791542	385.047523811166	167.55006438190833
DALYs (Disability-Adjusted Life Years)	East Asia	Male	30-34 years	Tobacco	Percent	2010	0.0294842422459784	0.0401662156225657	0.018465082221018
DALYs (Disability-Adjusted Life Years)	East Asia	Female	30-34 years	Tobacco	Percent	2010	0.0009010828642666	0.0015425836769518	0.0004067155185315
DALYs (Disability-Adjusted Life Years)	East Asia	Both	30-34 years	Tobacco	Percent	2010	0.0213374822790985	0.0289824727075308	0.0133056572483406
DALYs (Disability-Adjusted Life Years)	East Asia	Male	30-34 years	Tobacco	Rate	2010	0.5246852157599999	0.739171	0.321198
DALYs (Disability-Adjusted Life Years)	East Asia	Female	30-34 years	Tobacco	Rate	2010	0.00661051	0.011410124110000001	0.00285253
DALYs (Disability-Adjusted Life Years)	East Asia	Both	30-34 years	Tobacco	Rate	2010	0.27025882848000005	0.379767	0.165252
DALYs (Disability-Adjusted Life Years)	East Asia	Male	30-34 years	Tobacco	Number	2011	263.667619814075	380.65033857652287	161.96620482413192
DALYs (Disability-Adjusted Life Years)	East Asia	Female	30-34 years	Tobacco	Number	2011	3.218634445594948	5.782414082301161	1.472255525633042
DALYs (Disability-Adjusted Life Years)	East Asia	Both	30-34 years	Tobacco	Number	2011	266.8862542596698	385.7641853162007	163.60338932025562
DALYs (Disability-Adjusted Life Years)	East Asia	Male	30-34 years	Tobacco	Percent	2011	0.0291822843070327	0.0397085816509386	0.0184418604768444
DALYs (Disability-Adjusted Life Years)	East Asia	Female	30-34 years	Tobacco	Percent	2011	0.0008974245729032	0.0015726990195932	0.0004082280895039
DALYs (Disability-Adjusted Life Years)	East Asia	Both	30-34 years	Tobacco	Percent	2011	0.0211287760639124	0.0288591674916799	0.0133224425547167
DALYs (Disability-Adjusted Life Years)	East Asia	Male	30-34 years	Tobacco	Rate	2011	0.520086	0.750835	0.319479
DALYs (Disability-Adjusted Life Years)	East Asia	Female	30-34 years	Tobacco	Rate	2011	0.00658816	0.0118359	0.0030135295700000004
DALYs (Disability-Adjusted Life Years)	East Asia	Both	30-34 years	Tobacco	Rate	2011	0.268088	0.38750087262000005	0.16434
DALYs (Disability-Adjusted Life Years)	East Asia	Male	30-34 years	Tobacco	Number	2012	256.46333181538864	367.626111920569	152.8117885382028
DALYs (Disability-Adjusted Life Years)	East Asia	Female	30-34 years	Tobacco	Number	2012	3.044230892352153	5.570043087716897	1.3087717739957665
DALYs (Disability-Adjusted Life Years)	East Asia	Both	30-34 years	Tobacco	Number	2012	259.5075627077408	371.7120159190103	154.18776306763084
DALYs (Disability-Adjusted Life Years)	East Asia	Male	30-34 years	Tobacco	Percent	2012	0.0287758543852422	0.0389509727826657	0.0183481659465374
DALYs (Disability-Adjusted Life Years)	East Asia	Female	30-34 years	Tobacco	Percent	2012	0.0009046469722722	0.0016115523680335	0.0004007909751886
DALYs (Disability-Adjusted Life Years)	East Asia	Both	30-34 years	Tobacco	Percent	2012	0.0211237259354446	0.0291185792441298	0.0133742754952347
DALYs (Disability-Adjusted Life Years)	East Asia	Male	30-34 years	Tobacco	Rate	2012	0.510247	0.7314113721400001	0.304027
DALYs (Disability-Adjusted Life Years)	East Asia	Female	30-34 years	Tobacco	Rate	2012	0.0062884	0.0115059	0.0027035
DALYs (Disability-Adjusted Life Years)	East Asia	Both	30-34 years	Tobacco	Rate	2012	0.262998	0.376712	0.156262
DALYs (Disability-Adjusted Life Years)	East Asia	Male	30-34 years	Tobacco	Number	2013	254.6235209706655	376.3137729965038	156.06611912950592
DALYs (Disability-Adjusted Life Years)	East Asia	Female	30-34 years	Tobacco	Number	2013	2.9440712057353604	5.320489575858959	1.2922325740803269
DALYs (Disability-Adjusted Life Years)	East Asia	Both	30-34 years	Tobacco	Number	2013	257.5675921764008	379.92011824485706	157.69291665398023
DALYs (Disability-Adjusted Life Years)	East Asia	Male	30-34 years	Tobacco	Percent	2013	0.0284941450923112	0.0388070882952973	0.0182367600372927
DALYs (Disability-Adjusted Life Years)	East Asia	Female	30-34 years	Tobacco	Percent	2013	0.0009019508859013	0.0016428615230592	0.0003895081138133
DALYs (Disability-Adjusted Life Years)	East Asia	Both	30-34 years	Tobacco	Percent	2013	0.0210985115524715	0.0292384199585124	0.013421299225048
DALYs (Disability-Adjusted Life Years)	East Asia	Male	30-34 years	Tobacco	Rate	2013	0.504006	0.744882	0.30892
DALYs (Disability-Adjusted Life Years)	East Asia	Female	30-34 years	Tobacco	Rate	2013	0.00604682	0.0109277	0.00265411
DALYs (Disability-Adjusted Life Years)	East Asia	Both	30-34 years	Tobacco	Rate	2013	0.25962416859000004	0.382954	0.15895203286999998
DALYs (Disability-Adjusted Life Years)	East Asia	Male	30-34 years	Tobacco	Number	2014	267.7259016938301	388.5678545449952	158.36598557582448
DALYs (Disability-Adjusted Life Years)	East Asia	Female	30-34 years	Tobacco	Number	2014	2.845246160548918	5.189463653120402	1.2430546425875095
DALYs (Disability-Adjusted Life Years)	East Asia	Both	30-34 years	Tobacco	Number	2014	270.5711478543783	393.2512686437448	160.04501950439388
DALYs (Disability-Adjusted Life Years)	East Asia	Male	30-34 years	Tobacco	Percent	2014	0.0281002780982843	0.0381473234715339	0.0178202361215033
DALYs (Disability-Adjusted Life Years)	East Asia	Female	30-34 years	Tobacco	Percent	2014	0.0008923284538904	0.0016198253485029	0.0003898649151508
DALYs (Disability-Adjusted Life Years)	East Asia	Both	30-34 years	Tobacco	Percent	2014	0.021256411423418	0.0293912508449054	0.0132971411199969
DALYs (Disability-Adjusted Life Years)	East Asia	Male	30-34 years	Tobacco	Rate	2014	0.5178918342000001	0.75165	0.306345
DALYs (Disability-Adjusted Life Years)	East Asia	Female	30-34 years	Tobacco	Rate	2014	0.00570072	0.010397587239999999	0.0024905789800000002
DALYs (Disability-Adjusted Life Years)	East Asia	Both	30-34 years	Tobacco	Rate	2014	0.266296	0.387037	0.157516
DALYs (Disability-Adjusted Life Years)	East Asia	Male	30-34 years	Tobacco	Number	2015	276.081158019705	395.6753563484917	170.92963133220013
DALYs (Disability-Adjusted Life Years)	East Asia	Female	30-34 years	Tobacco	Number	2015	2.821748668415733	5.244888186550206	1.2272515096610572
DALYs (Disability-Adjusted Life Years)	East Asia	Both	30-34 years	Tobacco	Number	2015	278.9029066881209	398.8722863046479	172.2609740745902
DALYs (Disability-Adjusted Life Years)	East Asia	Male	30-34 years	Tobacco	Percent	2015	0.0277731502763296	0.0380460033827873	0.0176064244318179
DALYs (Disability-Adjusted Life Years)	East Asia	Female	30-34 years	Tobacco	Percent	2015	0.000886607879717	0.0016823190684991	0.0003845457986601
DALYs (Disability-Adjusted Life Years)	East Asia	Both	30-34 years	Tobacco	Percent	2015	0.0212363434955254	0.0292270462690348	0.0132591019871214
DALYs (Disability-Adjusted Life Years)	East Asia	Male	30-34 years	Tobacco	Rate	2015	0.512428	0.734404	0.317258
DALYs (Disability-Adjusted Life Years)	East Asia	Female	30-34 years	Tobacco	Rate	2015	0.0054108705299999995	0.0100574	0.0023533276000000003
DALYs (Disability-Adjusted Life Years)	East Asia	Both	30-34 years	Tobacco	Rate	2015	0.26305	0.3762	0.16246941043000002
DALYs (Disability-Adjusted Life Years)	East Asia	Male	30-34 years	Tobacco	Number	2016	294.61481296954	429.581476319248	176.32829284718372
DALYs (Disability-Adjusted Life Years)	East Asia	Female	30-34 years	Tobacco	Number	2016	2.985549584578607	5.660923494534252	1.2386349379177437
DALYs (Disability-Adjusted Life Years)	East Asia	Both	30-34 years	Tobacco	Number	2016	297.6003625541188	432.695731427401	177.39535754648722
DALYs (Disability-Adjusted Life Years)	East Asia	Male	30-34 years	Tobacco	Percent	2016	0.0275067568322122	0.0373340819900187	0.0176509202020298
DALYs (Disability-Adjusted Life Years)	East Asia	Female	30-34 years	Tobacco	Percent	2016	0.0008794705336364	0.0016682192985724	0.000362682584395
DALYs (Disability-Adjusted Life Years)	East Asia	Both	30-34 years	Tobacco	Percent	2016	0.021087882541815	0.0290103667224143	0.0132392040660956
DALYs (Disability-Adjusted Life Years)	East Asia	Male	30-34 years	Tobacco	Rate	2016	0.516803	0.753557	0.309309
DALYs (Disability-Adjusted Life Years)	East Asia	Female	30-34 years	Tobacco	Rate	2016	0.00539727	0.0102338	0.0022392
DALYs (Disability-Adjusted Life Years)	East Asia	Both	30-34 years	Tobacco	Rate	2016	0.26495	0.385224	0.157933
DALYs (Disability-Adjusted Life Years)	East Asia	Male	30-34 years	Tobacco	Number	2017	319.7650255268787	468.3010115088141	187.5761231870303
DALYs (Disability-Adjusted Life Years)	East Asia	Female	30-34 years	Tobacco	Number	2017	3.163719173090764	6.2212399479168425	1.270515293949165
DALYs (Disability-Adjusted Life Years)	East Asia	Both	30-34 years	Tobacco	Number	2017	322.9287446999696	473.2941534001365	190.36682204227003
DALYs (Disability-Adjusted Life Years)	East Asia	Male	30-34 years	Tobacco	Percent	2017	0.0272890311379635	0.037351403518549	0.0175234216320879
DALYs (Disability-Adjusted Life Years)	East Asia	Female	30-34 years	Tobacco	Percent	2017	0.000865731820867	0.0016282956130384	0.0003488755421779
DALYs (Disability-Adjusted Life Years)	East Asia	Both	30-34 years	Tobacco	Percent	2017	0.0209918487732747	0.0289578385359633	0.0127909918958563
DALYs (Disability-Adjusted Life Years)	East Asia	Male	30-34 years	Tobacco	Rate	2017	0.528821	0.774467	0.31021
DALYs (Disability-Adjusted Life Years)	East Asia	Female	30-34 years	Tobacco	Rate	2017	0.00539507	0.010609	0.0021666018500000003
DALYs (Disability-Adjusted Life Years)	East Asia	Both	30-34 years	Tobacco	Rate	2017	0.271122	0.397364	0.159827
DALYs (Disability-Adjusted Life Years)	East Asia	Male	30-34 years	Tobacco	Number	2018	343.4233490104168	503.7694790811579	207.19453346932116
DALYs (Disability-Adjusted Life Years)	East Asia	Female	30-34 years	Tobacco	Number	2018	3.3131857503320004	6.481941368191361	1.2932149080143107
DALYs (Disability-Adjusted Life Years)	East Asia	Both	30-34 years	Tobacco	Number	2018	346.7365347607492	507.6622745097611	209.9152313147844
DALYs (Disability-Adjusted Life Years)	East Asia	Male	30-34 years	Tobacco	Percent	2018	0.0271167340575869	0.0371790030478265	0.0175501540199922
DALYs (Disability-Adjusted Life Years)	East Asia	Female	30-34 years	Tobacco	Percent	2018	0.000857715213933	0.0016097587349345	0.0003323148219524
DALYs (Disability-Adjusted Life Years)	East Asia	Both	30-34 years	Tobacco	Percent	2018	0.0209617576668466	0.0294264368159443	0.0130330935494016
DALYs (Disability-Adjusted Life Years)	East Asia	Male	30-34 years	Tobacco	Rate	2018	0.5405940568500001	0.7930002057200001	0.326152
DALYs (Disability-Adjusted Life Years)	East Asia	Female	30-34 years	Tobacco	Rate	2018	0.00540333	0.0105711	0.00210905
DALYs (Disability-Adjusted Life Years)	East Asia	Both	30-34 years	Tobacco	Rate	2018	0.277735	0.406636	0.168141
DALYs (Disability-Adjusted Life Years)	East Asia	Male	30-34 years	Tobacco	Number	2019	355.4942844593573	539.5784240087356	203.25134654798188
DALYs (Disability-Adjusted Life Years)	East Asia	Female	30-34 years	Tobacco	Number	2019	3.37812781010959	6.614123346003634	1.3068361948749958
DALYs (Disability-Adjusted Life Years)	East Asia	Both	30-34 years	Tobacco	Number	2019	358.8724122694668	544.3824985884976	205.20322930257737
DALYs (Disability-Adjusted Life Years)	East Asia	Male	30-34 years	Tobacco	Percent	2019	0.0269479757396691	0.0370911322643868	0.0170232940150307
DALYs (Disability-Adjusted Life Years)	East Asia	Female	30-34 years	Tobacco	Percent	2019	0.0008468722039107	0.0015910649355237	0.0003285782358035
DALYs (Disability-Adjusted Life Years)	East Asia	Both	30-34 years	Tobacco	Percent	2019	0.0208677864057704	0.0296165769675286	0.0127196424472393
DALYs (Disability-Adjusted Life Years)	East Asia	Male	30-34 years	Tobacco	Rate	2019	0.542403	0.8232728149099999	0.310115
DALYs (Disability-Adjusted Life Years)	East Asia	Female	30-34 years	Tobacco	Rate	2019	0.00538818	0.0105497	0.00208443
DALYs (Disability-Adjusted Life Years)	East Asia	Both	30-34 years	Tobacco	Rate	2019	0.279853	0.424517	0.16002
DALYs (Disability-Adjusted Life Years)	East Asia	Male	30-34 years	Tobacco	Number	2020	353.3590987528358	529.3380547942572	198.998663460666
DALYs (Disability-Adjusted Life Years)	East Asia	Female	30-34 years	Tobacco	Number	2020	3.3116960470051016	6.629470811417203	1.1468111777269776
DALYs (Disability-Adjusted Life Years)	East Asia	Both	30-34 years	Tobacco	Number	2020	356.6707947998414	534.5333419434552	200.4281086628388
DALYs (Disability-Adjusted Life Years)	East Asia	Male	30-34 years	Tobacco	Percent	2020	0.0268583492695378	0.0372033484166728	0.0169724236475527
DALYs (Disability-Adjusted Life Years)	East Asia	Female	30-34 years	Tobacco	Percent	2020	0.0008248212169493	0.001560017828974	0.000304167017157
DALYs (Disability-Adjusted Life Years)	East Asia	Both	30-34 years	Tobacco	Percent	2020	0.0207419484341446	0.0291785595267691	0.0129645465795174
DALYs (Disability-Adjusted Life Years)	East Asia	Male	30-34 years	Tobacco	Rate	2020	0.535097	0.801585	0.30134690750000004
DALYs (Disability-Adjusted Life Years)	East Asia	Female	30-34 years	Tobacco	Rate	2020	0.0053081047700000005	0.010626	0.0018381499400000002
DALYs (Disability-Adjusted Life Years)	East Asia	Both	30-34 years	Tobacco	Rate	2020	0.27772512394000004	0.416219	0.156065
DALYs (Disability-Adjusted Life Years)	East Asia	Male	30-34 years	Tobacco	Number	2021	345.92538955146983	522.9652118868744	202.3239074873929
DALYs (Disability-Adjusted Life Years)	East Asia	Female	30-34 years	Tobacco	Number	2021	3.145073058399708	6.428738463560301	1.1117446718485384
DALYs (Disability-Adjusted Life Years)	East Asia	Both	30-34 years	Tobacco	Number	2021	349.0704626098695	527.6624385091416	204.83655764384312
DALYs (Disability-Adjusted Life Years)	East Asia	Male	30-34 years	Tobacco	Percent	2021	0.0267344714506941	0.037342029139629	0.0167220695183311
DALYs (Disability-Adjusted Life Years)	East Asia	Female	30-34 years	Tobacco	Percent	2021	0.0008076936795899	0.0015302856677739	0.0003083736882626
DALYs (Disability-Adjusted Life Years)	East Asia	Both	30-34 years	Tobacco	Percent	2021	0.020723240759411	0.0294995703284553	0.0125833418086971
DALYs (Disability-Adjusted Life Years)	East Asia	Male	30-34 years	Tobacco	Rate	2021	0.5351256132700001	0.8089954891400001	0.312983
DALYs (Disability-Adjusted Life Years)	East Asia	Female	30-34 years	Tobacco	Rate	2021	0.00522228	0.0106747	0.0018460128399999999
DALYs (Disability-Adjusted Life Years)	East Asia	Both	30-34 years	Tobacco	Rate	2021	0.279552	0.422577	0.164043
DALYs (Disability-Adjusted Life Years)	East Asia	Male	35-39 years	Tobacco	Number	1990	687.5221829216634	987.0557237445412	420.6208767246368
DALYs (Disability-Adjusted Life Years)	East Asia	Female	35-39 years	Tobacco	Number	1990	5.827705347447251	11.574753572128191	2.344589275371668
DALYs (Disability-Adjusted Life Years)	East Asia	Both	35-39 years	Tobacco	Number	1990	693.3498882691106	995.1610669669974	424.9636637065247
DALYs (Disability-Adjusted Life Years)	East Asia	Male	35-39 years	Tobacco	Percent	1990	0.0593806199721683	0.0826968116185545	0.0379935733502683
DALYs (Disability-Adjusted Life Years)	East Asia	Female	35-39 years	Tobacco	Percent	1990	0.0014112395801742	0.0027812264471043	0.0005976815030948
DALYs (Disability-Adjusted Life Years)	East Asia	Both	35-39 years	Tobacco	Percent	1990	0.0441315911532327	0.0618949245362193	0.0281478157437061
DALYs (Disability-Adjusted Life Years)	East Asia	Male	35-39 years	Tobacco	Rate	1990	1.41171	2.02676	0.863676
DALYs (Disability-Adjusted Life Years)	East Asia	Female	35-39 years	Tobacco	Rate	1990	0.0127877	0.0253984	0.005144725629999999
DALYs (Disability-Adjusted Life Years)	East Asia	Both	35-39 years	Tobacco	Rate	1990	0.735463	1.05561	0.450775
DALYs (Disability-Adjusted Life Years)	East Asia	Male	35-39 years	Tobacco	Number	1991	735.474508879096	1062.6607939115831	437.4622067651684
DALYs (Disability-Adjusted Life Years)	East Asia	Female	35-39 years	Tobacco	Number	1991	6.225557297505223	11.648435402450986	2.506907311865622
DALYs (Disability-Adjusted Life Years)	East Asia	Both	35-39 years	Tobacco	Number	1991	741.7000661766019	1075.7915295949051	440.727785768158
DALYs (Disability-Adjusted Life Years)	East Asia	Male	35-39 years	Tobacco	Percent	1991	0.0609505802838125	0.084709225760592	0.0392087120366392
DALYs (Disability-Adjusted Life Years)	East Asia	Female	35-39 years	Tobacco	Percent	1991	0.0014682885393063	0.0028435681166965	0.0006347953655615
DALYs (Disability-Adjusted Life Years)	East Asia	Both	35-39 years	Tobacco	Percent	1991	0.0454420060772578	0.0639821812172981	0.0288819957332194
DALYs (Disability-Adjusted Life Years)	East Asia	Male	35-39 years	Tobacco	Rate	1991	1.4563511578600001	2.10423	0.8662415673799999
DALYs (Disability-Adjusted Life Years)	East Asia	Female	35-39 years	Tobacco	Rate	1991	0.013238646150000002	0.0247704	0.00533094
DALYs (Disability-Adjusted Life Years)	East Asia	Both	35-39 years	Tobacco	Rate	1991	0.760509	1.10307	0.451904
DALYs (Disability-Adjusted Life Years)	East Asia	Male	35-39 years	Tobacco	Number	1992	753.881485770997	1088.6782388093643	450.76714467563664
DALYs (Disability-Adjusted Life Years)	East Asia	Female	35-39 years	Tobacco	Number	1992	6.416053785098429	12.194290715680518	2.6652376110365914
DALYs (Disability-Adjusted Life Years)	East Asia	Both	35-39 years	Tobacco	Number	1992	760.2975395560965	1098.180240692041	454.3351623330012
DALYs (Disability-Adjusted Life Years)	East Asia	Male	35-39 years	Tobacco	Percent	1992	0.0623140446241054	0.0859126763016046	0.0402908769851551
DALYs (Disability-Adjusted Life Years)	East Asia	Female	35-39 years	Tobacco	Percent	1992	0.0015279497854218	0.0028592806091489	0.0006472504065272
DALYs (Disability-Adjusted Life Years)	East Asia	Both	35-39 years	Tobacco	Percent	1992	0.0466487751605392	0.0650088728414417	0.0297002664154319
DALYs (Disability-Adjusted Life Years)	East Asia	Male	35-39 years	Tobacco	Rate	1992	1.47147	2.12495	0.8798356904000001
DALYs (Disability-Adjusted Life Years)	East Asia	Female	35-39 years	Tobacco	Rate	1992	0.0135172	0.025690668079999996	0.00561506
DALYs (Disability-Adjusted Life Years)	East Asia	Both	35-39 years	Tobacco	Rate	1992	0.77032	1.11266	0.460324
DALYs (Disability-Adjusted Life Years)	East Asia	Male	35-39 years	Tobacco	Number	1993	749.7556476577196	1082.5237209833404	459.76659569510406
DALYs (Disability-Adjusted Life Years)	East Asia	Female	35-39 years	Tobacco	Number	1993	6.4349674072807606	12.272409413795478	2.769115584674607
DALYs (Disability-Adjusted Life Years)	East Asia	Both	35-39 years	Tobacco	Number	1993	756.1906150649995	1093.2364479385735	463.16840976965176
DALYs (Disability-Adjusted Life Years)	East Asia	Male	35-39 years	Tobacco	Percent	1993	0.0634008949795771	0.0873766701275884	0.0415155087275875
DALYs (Disability-Adjusted Life Years)	East Asia	Female	35-39 years	Tobacco	Percent	1993	0.0016078933482447	0.0029796685613366	0.0007332877826999
DALYs (Disability-Adjusted Life Years)	East Asia	Both	35-39 years	Tobacco	Percent	1993	0.0477449510681727	0.0662003714577138	0.0309716601736936
DALYs (Disability-Adjusted Life Years)	East Asia	Male	35-39 years	Tobacco	Rate	1993	1.4896302049299999	2.1507807741900002	0.913474
DALYs (Disability-Adjusted Life Years)	East Asia	Female	35-39 years	Tobacco	Rate	1993	0.0138605	0.0264339	0.00596448
DALYs (Disability-Adjusted Life Years)	East Asia	Both	35-39 years	Tobacco	Rate	1993	0.781524	1.12986	0.47868511768000005
DALYs (Disability-Adjusted Life Years)	East Asia	Male	35-39 years	Tobacco	Number	1994	709.2471814341915	1019.6430177110856	447.70814474292
DALYs (Disability-Adjusted Life Years)	East Asia	Female	35-39 years	Tobacco	Number	1994	6.21385319399445	11.292925157866843	2.6200791655198667
DALYs (Disability-Adjusted Life Years)	East Asia	Both	35-39 years	Tobacco	Number	1994	715.461034628186	1028.5801337129117	452.5219740067803
DALYs (Disability-Adjusted Life Years)	East Asia	Male	35-39 years	Tobacco	Percent	1994	0.0641042519754961	0.0884562343347904	0.0420790341710315
DALYs (Disability-Adjusted Life Years)	East Asia	Female	35-39 years	Tobacco	Percent	1994	0.0016970656461133	0.0030271780530632	0.0007668197879731
DALYs (Disability-Adjusted Life Years)	East Asia	Both	35-39 years	Tobacco	Percent	1994	0.0485547836174574	0.0669162170265093	0.0313714568349461
DALYs (Disability-Adjusted Life Years)	East Asia	Male	35-39 years	Tobacco	Rate	1994	1.4657	2.10716	0.925217
DALYs (Disability-Adjusted Life Years)	East Asia	Female	35-39 years	Tobacco	Rate	1994	0.013957587359999999	0.0253662	0.005885234610000001
DALYs (Disability-Adjusted Life Years)	East Asia	Both	35-39 years	Tobacco	Rate	1994	0.770066	1.10708	0.487059
DALYs (Disability-Adjusted Life Years)	East Asia	Male	35-39 years	Tobacco	Number	1995	668.4078954613229	941.8245516511128	412.8787423834845
DALYs (Disability-Adjusted Life Years)	East Asia	Female	35-39 years	Tobacco	Number	1995	6.0888681612016775	11.139885629155271	2.753613178998417
DALYs (Disability-Adjusted Life Years)	East Asia	Both	35-39 years	Tobacco	Number	1995	674.4967636225249	951.8657864828226	415.9921990557101
DALYs (Disability-Adjusted Life Years)	East Asia	Male	35-39 years	Tobacco	Percent	1995	0.0643367904006949	0.0882771706902867	0.0422555970092449
DALYs (Disability-Adjusted Life Years)	East Asia	Female	35-39 years	Tobacco	Percent	1995	0.0017806169813694	0.0030956475415848	0.0008222201179706
DALYs (Disability-Adjusted Life Years)	East Asia	Both	35-39 years	Tobacco	Percent	1995	0.0488146887420153	0.0671714555885619	0.0314443115519973
DALYs (Disability-Adjusted Life Years)	East Asia	Male	35-39 years	Tobacco	Rate	1995	1.44111	2.0305994836799997	0.890178
DALYs (Disability-Adjusted Life Years)	East Asia	Female	35-39 years	Tobacco	Rate	1995	0.0142724	0.0261122	0.0064545333300000006
DALYs (Disability-Adjusted Life Years)	East Asia	Both	35-39 years	Tobacco	Rate	1995	0.757493	1.06899	0.46718
DALYs (Disability-Adjusted Life Years)	East Asia	Male	35-39 years	Tobacco	Number	1996	659.7703737752826	922.6918448734624	402.2960546890048
DALYs (Disability-Adjusted Life Years)	East Asia	Female	35-39 years	Tobacco	Number	1996	6.033444415647145	10.374317396992812	2.8474415199472896
DALYs (Disability-Adjusted Life Years)	East Asia	Both	35-39 years	Tobacco	Number	1996	665.8038181909299	930.7151320673185	406.64055882989976
DALYs (Disability-Adjusted Life Years)	East Asia	Male	35-39 years	Tobacco	Percent	1996	0.0642769668352711	0.0881412844976492	0.0422427255829872
DALYs (Disability-Adjusted Life Years)	East Asia	Female	35-39 years	Tobacco	Percent	1996	0.0018401891181873	0.003200901568106	0.0008585554144541
DALYs (Disability-Adjusted Life Years)	East Asia	Both	35-39 years	Tobacco	Percent	1996	0.0491169007145224	0.0674940020709421	0.0313804105399841
DALYs (Disability-Adjusted Life Years)	East Asia	Male	35-39 years	Tobacco	Rate	1996	1.45456	2.03421	0.88692
DALYs (Disability-Adjusted Life Years)	East Asia	Female	35-39 years	Tobacco	Rate	1996	0.014411	0.0247792	0.006801166930000001
DALYs (Disability-Adjusted Life Years)	East Asia	Both	35-39 years	Tobacco	Rate	1996	0.763311	1.06702	0.46619330539000003
DALYs (Disability-Adjusted Life Years)	East Asia	Male	35-39 years	Tobacco	Number	1997	682.4261830805559	974.0170372955208	429.9630994278645
DALYs (Disability-Adjusted Life Years)	East Asia	Female	35-39 years	Tobacco	Number	1997	6.203369257304336	10.717122023489374	2.834781484508791
DALYs (Disability-Adjusted Life Years)	East Asia	Both	35-39 years	Tobacco	Number	1997	688.6295523378602	983.6377144360208	433.96015194815584
DALYs (Disability-Adjusted Life Years)	East Asia	Male	35-39 years	Tobacco	Percent	1997	0.0641859651981435	0.0880576057938943	0.0419561655409021
DALYs (Disability-Adjusted Life Years)	East Asia	Female	35-39 years	Tobacco	Percent	1997	0.0018810127669951	0.003169790478672	0.0008831803047716
DALYs (Disability-Adjusted Life Years)	East Asia	Both	35-39 years	Tobacco	Percent	1997	0.0494052932087604	0.0680004862837735	0.0323170500999499
DALYs (Disability-Adjusted Life Years)	East Asia	Male	35-39 years	Tobacco	Rate	1997	1.47736	2.10861	0.9308106785400001
DALYs (Disability-Adjusted Life Years)	East Asia	Female	35-39 years	Tobacco	Rate	1997	0.014464170069999999	0.0249887	0.00660976
DALYs (Disability-Adjusted Life Years)	East Asia	Both	35-39 years	Tobacco	Rate	1997	0.7730448114099999	1.10422	0.48715690851000004
DALYs (Disability-Adjusted Life Years)	East Asia	Male	35-39 years	Tobacco	Number	1998	704.4179820154302	1005.889013440115	442.02837433602747
DALYs (Disability-Adjusted Life Years)	East Asia	Female	35-39 years	Tobacco	Number	1998	6.417771581163949	11.1702156510239	3.003267728364971
DALYs (Disability-Adjusted Life Years)	East Asia	Both	35-39 years	Tobacco	Number	1998	710.8357535965928	1014.927894781244	446.3513590917089
DALYs (Disability-Adjusted Life Years)	East Asia	Male	35-39 years	Tobacco	Percent	1998	0.0638845103525808	0.0872984066403752	0.0418018187121703
DALYs (Disability-Adjusted Life Years)	East Asia	Female	35-39 years	Tobacco	Percent	1998	0.001840599870558	0.0031003471744876	0.000908022317179
DALYs (Disability-Adjusted Life Years)	East Asia	Both	35-39 years	Tobacco	Percent	1998	0.0489471462395576	0.0673441796690426	0.0321703389599205
DALYs (Disability-Adjusted Life Years)	East Asia	Male	35-39 years	Tobacco	Rate	1998	1.4277588937599999	2.0387994369099998	0.8959310506899999
DALYs (Disability-Adjusted Life Years)	East Asia	Female	35-39 years	Tobacco	Rate	1998	0.0139051	0.0242021	0.006507061579999999
DALYs (Disability-Adjusted Life Years)	East Asia	Both	35-39 years	Tobacco	Rate	1998	0.744398	1.06285	0.467426
DALYs (Disability-Adjusted Life Years)	East Asia	Male	35-39 years	Tobacco	Number	1999	740.4119984809097	1034.20266365243	464.1802422619169
DALYs (Disability-Adjusted Life Years)	East Asia	Female	35-39 years	Tobacco	Number	1999	6.946612089348695	12.069419836783636	3.3867534525646112
DALYs (Disability-Adjusted Life Years)	East Asia	Both	35-39 years	Tobacco	Number	1999	747.3586105702582	1045.6517711036604	467.8247743333253
DALYs (Disability-Adjusted Life Years)	East Asia	Male	35-39 years	Tobacco	Percent	1999	0.0635874906398494	0.086873849383181	0.0413605820025541
DALYs (Disability-Adjusted Life Years)	East Asia	Female	35-39 years	Tobacco	Percent	1999	0.0018018112448895	0.0031086306393881	0.0008845928087201
DALYs (Disability-Adjusted Life Years)	East Asia	Both	35-39 years	Tobacco	Percent	1999	0.0481799124515141	0.0665337198784692	0.0310035954493053
DALYs (Disability-Adjusted Life Years)	East Asia	Male	35-39 years	Tobacco	Rate	1999	1.37776	1.9244413288400002	0.863745
DALYs (Disability-Adjusted Life Years)	East Asia	Female	35-39 years	Tobacco	Rate	1999	0.0137291	0.023853691469999997	0.00669349
DALYs (Disability-Adjusted Life Years)	East Asia	Both	35-39 years	Tobacco	Rate	1999	0.716285	1.00218	0.448374
DALYs (Disability-Adjusted Life Years)	East Asia	Male	35-39 years	Tobacco	Number	2000	820.1567629763767	1163.9856571338437	523.1520888211388
DALYs (Disability-Adjusted Life Years)	East Asia	Female	35-39 years	Tobacco	Number	2000	7.7116136225033936	13.839652558951002	3.732726322895114
DALYs (Disability-Adjusted Life Years)	East Asia	Both	35-39 years	Tobacco	Number	2000	827.8683765988784	1177.4826353484027	528.2093815165249
DALYs (Disability-Adjusted Life Years)	East Asia	Male	35-39 years	Tobacco	Percent	2000	0.0633270364060049	0.0866806097094938	0.0410891949495537
DALYs (Disability-Adjusted Life Years)	East Asia	Female	35-39 years	Tobacco	Percent	2000	0.0017761066532759	0.003082275599134	0.0008798237776893
DALYs (Disability-Adjusted Life Years)	East Asia	Both	35-39 years	Tobacco	Percent	2000	0.0478354889262772	0.0654659244066691	0.0313967998644086
DALYs (Disability-Adjusted Life Years)	East Asia	Male	35-39 years	Tobacco	Rate	2000	1.40432	1.99304	0.895771
DALYs (Disability-Adjusted Life Years)	East Asia	Female	35-39 years	Tobacco	Rate	2000	0.0139489	0.0250334	0.00675182
DALYs (Disability-Adjusted Life Years)	East Asia	Both	35-39 years	Tobacco	Rate	2000	0.7281983121400001	1.03572	0.464616
DALYs (Disability-Adjusted Life Years)	East Asia	Male	35-39 years	Tobacco	Number	2001	923.0047026232008	1313.9231019769932	586.6870071385467
DALYs (Disability-Adjusted Life Years)	East Asia	Female	35-39 years	Tobacco	Number	2001	8.774798057705134	15.070331188352244	4.241005138631502
DALYs (Disability-Adjusted Life Years)	East Asia	Both	35-39 years	Tobacco	Number	2001	931.779500680906	1326.744199285452	591.3906582803708
DALYs (Disability-Adjusted Life Years)	East Asia	Male	35-39 years	Tobacco	Percent	2001	0.0628768588501503	0.0859225403274205	0.0408740366944747
DALYs (Disability-Adjusted Life Years)	East Asia	Female	35-39 years	Tobacco	Percent	2001	0.0017646534220709	0.0029892791291086	0.0008777812681845
DALYs (Disability-Adjusted Life Years)	East Asia	Both	35-39 years	Tobacco	Percent	2001	0.0473839576897871	0.0649951865544311	0.0305843124114776
DALYs (Disability-Adjusted Life Years)	East Asia	Male	35-39 years	Tobacco	Rate	2001	1.47762	2.10343	0.9392137551199999
DALYs (Disability-Adjusted Life Years)	East Asia	Female	35-39 years	Tobacco	Rate	2001	0.014743882239999999	0.025321971729999997	0.00712596
DALYs (Disability-Adjusted Life Years)	East Asia	Both	35-39 years	Tobacco	Rate	2001	0.7638751541200001	1.08767	0.484824
DALYs (Disability-Adjusted Life Years)	East Asia	Male	35-39 years	Tobacco	Number	2002	1048.1412161900805	1469.7996057446098	675.5949796577318
DALYs (Disability-Adjusted Life Years)	East Asia	Female	35-39 years	Tobacco	Number	2002	9.352119405767176	15.72556932160064	4.665546089173025
DALYs (Disability-Adjusted Life Years)	East Asia	Both	35-39 years	Tobacco	Number	2002	1057.4933355958476	1484.576270212348	682.36476119797
DALYs (Disability-Adjusted Life Years)	East Asia	Male	35-39 years	Tobacco	Percent	2002	0.0622375588481258	0.0852960622586234	0.0406180388343418
DALYs (Disability-Adjusted Life Years)	East Asia	Female	35-39 years	Tobacco	Percent	2002	0.0017272036010111	0.0029637990203434	0.000872766968453
DALYs (Disability-Adjusted Life Years)	East Asia	Both	35-39 years	Tobacco	Percent	2002	0.0474873084432323	0.0652630681317996	0.0311682674541356
DALYs (Disability-Adjusted Life Years)	East Asia	Male	35-39 years	Tobacco	Rate	2002	1.60155	2.24584	1.0323
DALYs (Disability-Adjusted Life Years)	East Asia	Female	35-39 years	Tobacco	Rate	2002	0.0149359	0.0251147	0.00745118
DALYs (Disability-Adjusted Life Years)	East Asia	Both	35-39 years	Tobacco	Rate	2002	0.825778	1.15928	0.532846
DALYs (Disability-Adjusted Life Years)	East Asia	Male	35-39 years	Tobacco	Number	2003	1121.146735416488	1570.0071350045173	706.1063856388187
DALYs (Disability-Adjusted Life Years)	East Asia	Female	35-39 years	Tobacco	Number	2003	9.354663828998287	16.406995019788994	4.619330435222086
DALYs (Disability-Adjusted Life Years)	East Asia	Both	35-39 years	Tobacco	Number	2003	1130.5013992454883	1584.9988668578258	711.442955083978
DALYs (Disability-Adjusted Life Years)	East Asia	Male	35-39 years	Tobacco	Percent	2003	0.0614891303151966	0.0842535128989619	0.040157272270215
DALYs (Disability-Adjusted Life Years)	East Asia	Female	35-39 years	Tobacco	Percent	2003	0.0016991429987353	0.0029241636083583	0.0008538694982154
DALYs (Disability-Adjusted Life Years)	East Asia	Both	35-39 years	Tobacco	Percent	2003	0.0475905799516601	0.0656699388217331	0.0309464910082733
DALYs (Disability-Adjusted Life Years)	East Asia	Male	35-39 years	Tobacco	Rate	2003	1.67571	2.3465891130000003	1.05537
DALYs (Disability-Adjusted Life Years)	East Asia	Female	35-39 years	Tobacco	Rate	2003	0.014596174370000001	0.0256	0.00720759
DALYs (Disability-Adjusted Life Years)	East Asia	Both	35-39 years	Tobacco	Rate	2003	0.863006	1.20996	0.543104
DALYs (Disability-Adjusted Life Years)	East Asia	Male	35-39 years	Tobacco	Number	2004	1146.263241275284	1595.1314041837109	713.4931143174119
DALYs (Disability-Adjusted Life Years)	East Asia	Female	35-39 years	Tobacco	Number	2004	9.42050137596987	16.826833639540297	4.445659872559059
DALYs (Disability-Adjusted Life Years)	East Asia	Both	35-39 years	Tobacco	Number	2004	1155.683742651254	1608.7243548312051	721.3134474195782
DALYs (Disability-Adjusted Life Years)	East Asia	Male	35-39 years	Tobacco	Percent	2004	0.0607142558040727	0.0832930100754007	0.0395281131024797
DALYs (Disability-Adjusted Life Years)	East Asia	Female	35-39 years	Tobacco	Percent	2004	0.001675662076281	0.002881761289735	0.0008277319806393
DALYs (Disability-Adjusted Life Years)	East Asia	Both	35-39 years	Tobacco	Percent	2004	0.0471504285732539	0.0642761473700342	0.0307681431468734
DALYs (Disability-Adjusted Life Years)	East Asia	Male	35-39 years	Tobacco	Rate	2004	1.70191	2.36837	1.05936
DALYs (Disability-Adjusted Life Years)	East Asia	Female	35-39 years	Tobacco	Rate	2004	0.0146157	0.0261064	0.006897320849999999
DALYs (Disability-Adjusted Life Years)	East Asia	Both	35-39 years	Tobacco	Rate	2004	0.8768037590000001	1.22052	0.547252
DALYs (Disability-Adjusted Life Years)	East Asia	Male	35-39 years	Tobacco	Number	2005	1148.8839458874295	1593.9680485884724	730.6353927534585
DALYs (Disability-Adjusted Life Years)	East Asia	Female	35-39 years	Tobacco	Number	2005	9.304114318021758	15.963759626745318	4.490294923309213
DALYs (Disability-Adjusted Life Years)	East Asia	Both	35-39 years	Tobacco	Number	2005	1158.1880602054518	1602.6464777307974	735.2746061430789
DALYs (Disability-Adjusted Life Years)	East Asia	Male	35-39 years	Tobacco	Percent	2005	0.060143035772606	0.0824612773716812	0.0389480476686279
DALYs (Disability-Adjusted Life Years)	East Asia	Female	35-39 years	Tobacco	Percent	2005	0.0016487695367787	0.0029234104718329	0.000836521555349
DALYs (Disability-Adjusted Life Years)	East Asia	Both	35-39 years	Tobacco	Percent	2005	0.0467789473377017	0.0634595247939811	0.0304160156211092
DALYs (Disability-Adjusted Life Years)	East Asia	Male	35-39 years	Tobacco	Rate	2005	1.7089409740500001	2.37099	1.0868
DALYs (Disability-Adjusted Life Years)	East Asia	Female	35-39 years	Tobacco	Rate	2005	0.014499186239999998	0.024877330170000003	0.00699751
DALYs (Disability-Adjusted Life Years)	East Asia	Both	35-39 years	Tobacco	Rate	2005	0.881437	1.2196910734400002	0.559579
DALYs (Disability-Adjusted Life Years)	East Asia	Male	35-39 years	Tobacco	Number	2006	1138.8764499029596	1561.6011091806276	723.9318341033711
DALYs (Disability-Adjusted Life Years)	East Asia	Female	35-39 years	Tobacco	Number	2006	8.979416128248841	15.9541447800924	4.433318859676605
DALYs (Disability-Adjusted Life Years)	East Asia	Both	35-39 years	Tobacco	Number	2006	1147.8558660312058	1571.1556928554064	729.1683009035908
DALYs (Disability-Adjusted Life Years)	East Asia	Male	35-39 years	Tobacco	Percent	2006	0.0598563572723588	0.0818529519576874	0.0388089152738206
DALYs (Disability-Adjusted Life Years)	East Asia	Female	35-39 years	Tobacco	Percent	2006	0.0016216081317628	0.0028693336500942	0.0007973638162512
DALYs (Disability-Adjusted Life Years)	East Asia	Both	35-39 years	Tobacco	Percent	2006	0.0467069907398908	0.0636942502164195	0.0296920340624466
DALYs (Disability-Adjusted Life Years)	East Asia	Male	35-39 years	Tobacco	Rate	2006	1.7020846314200002	2.33386	1.08194
DALYs (Disability-Adjusted Life Years)	East Asia	Female	35-39 years	Tobacco	Rate	2006	0.014132797200000002	0.025110395770000002	0.006977647040000001
DALYs (Disability-Adjusted Life Years)	East Asia	Both	35-39 years	Tobacco	Rate	2006	0.8799424486899999	1.20444	0.558978
DALYs (Disability-Adjusted Life Years)	East Asia	Male	35-39 years	Tobacco	Number	2007	1133.8188107682806	1558.4063503455186	723.632264394786
DALYs (Disability-Adjusted Life Years)	East Asia	Female	35-39 years	Tobacco	Number	2007	8.544579237201484	15.047599893248323	4.322012878385701
DALYs (Disability-Adjusted Life Years)	East Asia	Both	35-39 years	Tobacco	Number	2007	1142.363390005481	1572.5161041978708	727.655828480936
DALYs (Disability-Adjusted Life Years)	East Asia	Male	35-39 years	Tobacco	Percent	2007	0.0595637665640685	0.0809610506929723	0.0388557243313598
DALYs (Disability-Adjusted Life Years)	East Asia	Female	35-39 years	Tobacco	Percent	2007	0.0015888901551951	0.0028093559401781	0.0007676036737801
DALYs (Disability-Adjusted Life Years)	East Asia	Both	35-39 years	Tobacco	Percent	2007	0.0467586783110894	0.0643979278737953	0.030198036205735
DALYs (Disability-Adjusted Life Years)	East Asia	Male	35-39 years	Tobacco	Rate	2007	1.70771	2.34721	1.0899
DALYs (Disability-Adjusted Life Years)	East Asia	Female	35-39 years	Tobacco	Rate	2007	0.0135909	0.023934516280000002	0.0068745373599999994
DALYs (Disability-Adjusted Life Years)	East Asia	Both	35-39 years	Tobacco	Rate	2007	0.883745	1.21652	0.562922
DALYs (Disability-Adjusted Life Years)	East Asia	Male	35-39 years	Tobacco	Number	2008	1117.558404795469	1519.924233258134	716.6221303197385
DALYs (Disability-Adjusted Life Years)	East Asia	Female	35-39 years	Tobacco	Number	2008	8.234234573734552	14.463542826383502	3.973681222992997
DALYs (Disability-Adjusted Life Years)	East Asia	Both	35-39 years	Tobacco	Number	2008	1125.7926393692028	1530.1826657433835	722.8511279173654
DALYs (Disability-Adjusted Life Years)	East Asia	Male	35-39 years	Tobacco	Percent	2008	0.0593624154451589	0.0804792861013007	0.0386852214281205
DALYs (Disability-Adjusted Life Years)	East Asia	Female	35-39 years	Tobacco	Percent	2008	0.0016029016773518	0.0027846970897526	0.0007838179482325
DALYs (Disability-Adjusted Life Years)	East Asia	Both	35-39 years	Tobacco	Percent	2008	0.0469609700506106	0.0640603817286629	0.0304419776910138
DALYs (Disability-Adjusted Life Years)	East Asia	Male	35-39 years	Tobacco	Rate	2008	1.70212	2.31495	1.09146
DALYs (Disability-Adjusted Life Years)	East Asia	Female	35-39 years	Tobacco	Rate	2008	0.0132315	0.0232413	0.0063852757800000005
DALYs (Disability-Adjusted Life Years)	East Asia	Both	35-39 years	Tobacco	Rate	2008	0.8802898474799999	1.19649	0.5652182177199999
DALYs (Disability-Adjusted Life Years)	East Asia	Male	35-39 years	Tobacco	Number	2009	1112.8502987107906	1520.5687788790813	707.3698377857722
DALYs (Disability-Adjusted Life Years)	East Asia	Female	35-39 years	Tobacco	Number	2009	8.116243940639654	14.412476070662004	3.924612461214285
DALYs (Disability-Adjusted Life Years)	East Asia	Both	35-39 years	Tobacco	Number	2009	1120.96654265143	1532.2602135158531	713.421157684868
DALYs (Disability-Adjusted Life Years)	East Asia	Male	35-39 years	Tobacco	Percent	2009	0.0592788362507391	0.0802036955678278	0.0387435833470892
DALYs (Disability-Adjusted Life Years)	East Asia	Female	35-39 years	Tobacco	Percent	2009	0.0016259870051878	0.0028212720594166	0.0008000092041255
DALYs (Disability-Adjusted Life Years)	East Asia	Both	35-39 years	Tobacco	Percent	2009	0.0471388037101233	0.0640936203289348	0.0304638240637153
DALYs (Disability-Adjusted Life Years)	East Asia	Male	35-39 years	Tobacco	Rate	2009	1.72702	2.35975	1.0977565847800002
DALYs (Disability-Adjusted Life Years)	East Asia	Female	35-39 years	Tobacco	Rate	2009	0.0132302	0.0234936	0.006397463569999999
DALYs (Disability-Adjusted Life Years)	East Asia	Both	35-39 years	Tobacco	Rate	2009	0.8911826666399999	1.21817	0.567179
DALYs (Disability-Adjusted Life Years)	East Asia	Male	35-39 years	Tobacco	Number	2010	1095.6494899906738	1513.3949928261914	695.6512116277559
DALYs (Disability-Adjusted Life Years)	East Asia	Female	35-39 years	Tobacco	Number	2010	7.683918799163954	14.111487993998024	3.629096591140732
DALYs (Disability-Adjusted Life Years)	East Asia	Both	35-39 years	Tobacco	Number	2010	1103.333408789839	1524.0100197694633	699.1834449247683
DALYs (Disability-Adjusted Life Years)	East Asia	Male	35-39 years	Tobacco	Percent	2010	0.059171963905943	0.0795957951234943	0.0385393073100293
DALYs (Disability-Adjusted Life Years)	East Asia	Female	35-39 years	Tobacco	Percent	2010	0.0015969905323302	0.0028362500574498	0.0008025209642564
DALYs (Disability-Adjusted Life Years)	East Asia	Both	35-39 years	Tobacco	Percent	2010	0.0472874414571382	0.064467418405688	0.0300573514057237
DALYs (Disability-Adjusted Life Years)	East Asia	Male	35-39 years	Tobacco	Rate	2010	1.7504	2.41778	1.11137
DALYs (Disability-Adjusted Life Years)	East Asia	Female	35-39 years	Tobacco	Rate	2010	0.012823273139999999	0.0235499	0.0060564014299999995
DALYs (Disability-Adjusted Life Years)	East Asia	Both	35-39 years	Tobacco	Rate	2010	0.900563	1.2439278899500001	0.570688
DALYs (Disability-Adjusted Life Years)	East Asia	Male	35-39 years	Tobacco	Number	2011	1039.2540122806429	1464.7110808105415	665.713724593644
DALYs (Disability-Adjusted Life Years)	East Asia	Female	35-39 years	Tobacco	Number	2011	7.353115167099727	13.28230549734434	3.647486222327824
DALYs (Disability-Adjusted Life Years)	East Asia	Both	35-39 years	Tobacco	Number	2011	1046.6071274477426	1472.763421009725	670.0307159209427
DALYs (Disability-Adjusted Life Years)	East Asia	Male	35-39 years	Tobacco	Percent	2011	0.0589462935316829	0.0798985873106974	0.0380520469170166
DALYs (Disability-Adjusted Life Years)	East Asia	Female	35-39 years	Tobacco	Percent	2011	0.0015790842933287	0.0027404002659829	0.0008083686450066
DALYs (Disability-Adjusted Life Years)	East Asia	Both	35-39 years	Tobacco	Percent	2011	0.0469384402017937	0.0651757366246745	0.0300276124005055
DALYs (Disability-Adjusted Life Years)	East Asia	Male	35-39 years	Tobacco	Rate	2011	1.7275262068900001	2.43475	1.1065994376100001
DALYs (Disability-Adjusted Life Years)	East Asia	Female	35-39 years	Tobacco	Rate	2011	0.0127173	0.0229719	0.00630836
DALYs (Disability-Adjusted Life Years)	East Asia	Both	35-39 years	Tobacco	Rate	2011	0.8871176901600001	1.24833	0.567927
DALYs (Disability-Adjusted Life Years)	East Asia	Male	35-39 years	Tobacco	Number	2012	969.4458438059644	1392.603977359514	595.7746988930236
DALYs (Disability-Adjusted Life Years)	East Asia	Female	35-39 years	Tobacco	Number	2012	6.9365242850669215	12.59589478165255	3.366885807759022
DALYs (Disability-Adjusted Life Years)	East Asia	Both	35-39 years	Tobacco	Number	2012	976.3823680910308	1400.8519056099344	599.9283043613977
DALYs (Disability-Adjusted Life Years)	East Asia	Male	35-39 years	Tobacco	Percent	2012	0.0586284025716071	0.0791623138317639	0.0379564592304797
DALYs (Disability-Adjusted Life Years)	East Asia	Female	35-39 years	Tobacco	Percent	2012	0.001574121104017	0.0028311667707103	0.0007895510892129
DALYs (Disability-Adjusted Life Years)	East Asia	Both	35-39 years	Tobacco	Percent	2012	0.0465818882181988	0.0637379903916087	0.029900662621092
DALYs (Disability-Adjusted Life Years)	East Asia	Male	35-39 years	Tobacco	Rate	2012	1.6892190071800002	2.42655	1.03811
DALYs (Disability-Adjusted Life Years)	East Asia	Female	35-39 years	Tobacco	Rate	2012	0.0125572	0.0228024	0.006095100480000001
DALYs (Disability-Adjusted Life Years)	East Asia	Both	35-39 years	Tobacco	Rate	2012	0.866898	1.24377	0.532657
DALYs (Disability-Adjusted Life Years)	East Asia	Male	35-39 years	Tobacco	Number	2013	933.6268451958382	1364.2761565473254	584.7700011775466
DALYs (Disability-Adjusted Life Years)	East Asia	Female	35-39 years	Tobacco	Number	2013	6.446427024064798	12.088059855859274	3.147026096222664
DALYs (Disability-Adjusted Life Years)	East Asia	Both	35-39 years	Tobacco	Number	2013	940.0732722199026	1371.6707572682508	588.6109685641713
DALYs (Disability-Adjusted Life Years)	East Asia	Male	35-39 years	Tobacco	Percent	2013	0.0582558611472866	0.0790691555922177	0.03745722834611
DALYs (Disability-Adjusted Life Years)	East Asia	Female	35-39 years	Tobacco	Percent	2013	0.0015569476732893	0.0027720925376204	0.0007715467326471
DALYs (Disability-Adjusted Life Years)	East Asia	Both	35-39 years	Tobacco	Percent	2013	0.0465796829546136	0.0646723948670314	0.0299695277473322
DALYs (Disability-Adjusted Life Years)	East Asia	Male	35-39 years	Tobacco	Rate	2013	1.70579	2.4926	1.06841
DALYs (Disability-Adjusted Life Years)	East Asia	Female	35-39 years	Tobacco	Rate	2013	0.012251787390000001	0.022974	0.00598109
DALYs (Disability-Adjusted Life Years)	East Asia	Both	35-39 years	Tobacco	Rate	2013	0.875715	1.2777654540199999	0.548314
DALYs (Disability-Adjusted Life Years)	East Asia	Male	35-39 years	Tobacco	Number	2014	969.375230355349	1386.1709924537192	606.8361548414657
DALYs (Disability-Adjusted Life Years)	East Asia	Female	35-39 years	Tobacco	Number	2014	6.078465393180706	11.455101805836732	2.870099140032691
DALYs (Disability-Adjusted Life Years)	East Asia	Both	35-39 years	Tobacco	Number	2014	975.4536957485288	1393.3386266903908	609.477609107832
DALYs (Disability-Adjusted Life Years)	East Asia	Male	35-39 years	Tobacco	Percent	2014	0.0575829282037471	0.0782011721979025	0.0369635777235563
DALYs (Disability-Adjusted Life Years)	East Asia	Female	35-39 years	Tobacco	Percent	2014	0.0015302263352155	0.0027998294704716	0.0007400482428923
DALYs (Disability-Adjusted Life Years)	East Asia	Both	35-39 years	Tobacco	Percent	2014	0.0468508756667544	0.0645434734543478	0.0298595630972408
DALYs (Disability-Adjusted Life Years)	East Asia	Male	35-39 years	Tobacco	Rate	2014	1.8417447144499999	2.63363	1.15295
DALYs (Disability-Adjusted Life Years)	East Asia	Female	35-39 years	Tobacco	Rate	2014	0.0120527	0.0227137	0.00569097
DALYs (Disability-Adjusted Life Years)	East Asia	Both	35-39 years	Tobacco	Rate	2014	0.9464355253500001	1.35189	0.591347
DALYs (Disability-Adjusted Life Years)	East Asia	Male	35-39 years	Tobacco	Number	2015	954.5264890512462	1367.5610167981204	591.6624481021041
DALYs (Disability-Adjusted Life Years)	East Asia	Female	35-39 years	Tobacco	Number	2015	5.856807676484345	10.83740065565129	2.650141736558329
DALYs (Disability-Adjusted Life Years)	East Asia	Both	35-39 years	Tobacco	Number	2015	960.3832967277308	1376.0284542718969	598.2780098014653
DALYs (Disability-Adjusted Life Years)	East Asia	Male	35-39 years	Tobacco	Percent	2015	0.0569008697932506	0.0774384090811279	0.0363649819458665
DALYs (Disability-Adjusted Life Years)	East Asia	Female	35-39 years	Tobacco	Percent	2015	0.0015045312471006	0.00275553197667	0.0007150085361853
DALYs (Disability-Adjusted Life Years)	East Asia	Both	35-39 years	Tobacco	Percent	2015	0.0464301004497282	0.0639527049301304	0.030082478566835
DALYs (Disability-Adjusted Life Years)	East Asia	Male	35-39 years	Tobacco	Rate	2015	1.8647905838299998	2.67171	1.15589
DALYs (Disability-Adjusted Life Years)	East Asia	Female	35-39 years	Tobacco	Rate	2015	0.0119894	0.022185063829999997	0.00542506
DALYs (Disability-Adjusted Life Years)	East Asia	Both	35-39 years	Tobacco	Rate	2015	0.9600302073299999	1.37552	0.598058
DALYs (Disability-Adjusted Life Years)	East Asia	Male	35-39 years	Tobacco	Number	2016	939.7226923157606	1386.6170031349734	584.3175610274398
DALYs (Disability-Adjusted Life Years)	East Asia	Female	35-39 years	Tobacco	Number	2016	5.766034895163156	10.67957167545578	2.535976204692921
DALYs (Disability-Adjusted Life Years)	East Asia	Both	35-39 years	Tobacco	Number	2016	945.4887272109236	1394.2579888725895	587.7677014273763
DALYs (Disability-Adjusted Life Years)	East Asia	Male	35-39 years	Tobacco	Percent	2016	0.056078712853836	0.0764898007610675	0.0359508505316271
DALYs (Disability-Adjusted Life Years)	East Asia	Female	35-39 years	Tobacco	Percent	2016	0.0014885404269322	0.002799778015043	0.000711126080649
DALYs (Disability-Adjusted Life Years)	East Asia	Both	35-39 years	Tobacco	Percent	2016	0.045788273847739	0.0627410387960208	0.0290169998702352
DALYs (Disability-Adjusted Life Years)	East Asia	Male	35-39 years	Tobacco	Rate	2016	1.87178	2.76192	1.16387
DALYs (Disability-Adjusted Life Years)	East Asia	Female	35-39 years	Tobacco	Rate	2016	0.012079899739999999	0.0223738	0.0053128950599999995
DALYs (Disability-Adjusted Life Years)	East Asia	Both	35-39 years	Tobacco	Rate	2016	0.965402	1.42362	0.600147
DALYs (Disability-Adjusted Life Years)	East Asia	Male	35-39 years	Tobacco	Number	2017	946.2042043778672	1380.6136459256536	563.5083658825879
DALYs (Disability-Adjusted Life Years)	East Asia	Female	35-39 years	Tobacco	Number	2017	5.678290149385297	10.861763669347363	2.5956630967118426
DALYs (Disability-Adjusted Life Years)	East Asia	Both	35-39 years	Tobacco	Number	2017	951.8824945272532	1389.199556023707	567.6591865709479
DALYs (Disability-Adjusted Life Years)	East Asia	Male	35-39 years	Tobacco	Percent	2017	0.0552479365429235	0.0760489591680948	0.0351145689128919
DALYs (Disability-Adjusted Life Years)	East Asia	Female	35-39 years	Tobacco	Percent	2017	0.0014712449973658	0.0027620619978782	0.0006836917279374
DALYs (Disability-Adjusted Life Years)	East Asia	Both	35-39 years	Tobacco	Percent	2017	0.0453273123006384	0.0621365616866156	0.0286398293711495
DALYs (Disability-Adjusted Life Years)	East Asia	Male	35-39 years	Tobacco	Rate	2017	1.9036	2.77756	1.13368
DALYs (Disability-Adjusted Life Years)	East Asia	Female	35-39 years	Tobacco	Rate	2017	0.012050911639999998	0.0230517	0.00550872
DALYs (Disability-Adjusted Life Years)	East Asia	Both	35-39 years	Tobacco	Rate	2017	0.9830943794400001	1.43475	0.586273
DALYs (Disability-Adjusted Life Years)	East Asia	Male	35-39 years	Tobacco	Number	2018	976.356651203843	1439.3174095093505	591.0287028208766
DALYs (Disability-Adjusted Life Years)	East Asia	Female	35-39 years	Tobacco	Number	2018	5.634187237935942	10.708421883590614	2.567721007078579
DALYs (Disability-Adjusted Life Years)	East Asia	Both	35-39 years	Tobacco	Number	2018	981.9908384417794	1445.322516860812	595.6175211618174
DALYs (Disability-Adjusted Life Years)	East Asia	Male	35-39 years	Tobacco	Percent	2018	0.0545899629290654	0.0755238093737474	0.0352931701785925
DALYs (Disability-Adjusted Life Years)	East Asia	Female	35-39 years	Tobacco	Percent	2018	0.0014473723505078	0.002647274243163	0.0006748620162099
DALYs (Disability-Adjusted Life Years)	East Asia	Both	35-39 years	Tobacco	Percent	2018	0.0450354480783492	0.0629226445601122	0.028671808252019
DALYs (Disability-Adjusted Life Years)	East Asia	Male	35-39 years	Tobacco	Rate	2018	1.9559533064499999	2.88341	1.1840187129000002
DALYs (Disability-Adjusted Life Years)	East Asia	Female	35-39 years	Tobacco	Rate	2018	0.0119279	0.0226703	0.005436
DALYs (Disability-Adjusted Life Years)	East Asia	Both	35-39 years	Tobacco	Rate	2018	1.01077	1.48768	0.613074
DALYs (Disability-Adjusted Life Years)	East Asia	Male	35-39 years	Tobacco	Number	2019	980.7805950956284	1458.6930816824606	610.3248158108602
DALYs (Disability-Adjusted Life Years)	East Asia	Female	35-39 years	Tobacco	Number	2019	5.641723910796356	10.833525970908548	2.532137118845756
DALYs (Disability-Adjusted Life Years)	East Asia	Both	35-39 years	Tobacco	Number	2019	986.4223190064242	1470.0307079594577	614.9076457856536
DALYs (Disability-Adjusted Life Years)	East Asia	Male	35-39 years	Tobacco	Percent	2019	0.0540064491649581	0.0749987115952444	0.0351957335948109
DALYs (Disability-Adjusted Life Years)	East Asia	Female	35-39 years	Tobacco	Percent	2019	0.0014197348737812	0.0027116672337175	0.000655317460206
DALYs (Disability-Adjusted Life Years)	East Asia	Both	35-39 years	Tobacco	Percent	2019	0.0445082151886062	0.0618025977779122	0.0287431989574755
DALYs (Disability-Adjusted Life Years)	East Asia	Male	35-39 years	Tobacco	Rate	2019	1.9206240859600001	2.8565013222199998	1.19518
DALYs (Disability-Adjusted Life Years)	East Asia	Female	35-39 years	Tobacco	Rate	2019	0.0116808	0.0224301	0.00524261
DALYs (Disability-Adjusted Life Years)	East Asia	Both	35-39 years	Tobacco	Rate	2019	0.992727	1.47943	0.618838
DALYs (Disability-Adjusted Life Years)	East Asia	Male	35-39 years	Tobacco	Number	2020	980.8204135245936	1441.227948822639	604.2672536681415
DALYs (Disability-Adjusted Life Years)	East Asia	Female	35-39 years	Tobacco	Number	2020	5.627912199143696	11.102118219703284	2.3645464003619545
DALYs (Disability-Adjusted Life Years)	East Asia	Both	35-39 years	Tobacco	Number	2020	986.4483257237368	1450.0737369628832	608.0327212022371
DALYs (Disability-Adjusted Life Years)	East Asia	Male	35-39 years	Tobacco	Percent	2020	0.0538408496289138	0.074997112748513	0.034916054174551
DALYs (Disability-Adjusted Life Years)	East Asia	Female	35-39 years	Tobacco	Percent	2020	0.0013696742727036	0.0026652243671617	0.0006151255611224
DALYs (Disability-Adjusted Life Years)	East Asia	Both	35-39 years	Tobacco	Percent	2020	0.0441276969750994	0.0625604714857677	0.0282411427157409
DALYs (Disability-Adjusted Life Years)	East Asia	Male	35-39 years	Tobacco	Rate	2020	1.8425528818399999	2.7074668041899996	1.1351663916199999
DALYs (Disability-Adjusted Life Years)	East Asia	Female	35-39 years	Tobacco	Rate	2020	0.0111701	0.022035062629999998	0.00469306
DALYs (Disability-Adjusted Life Years)	East Asia	Both	35-39 years	Tobacco	Rate	2020	0.952028	1.3994760179299999	0.586817
DALYs (Disability-Adjusted Life Years)	East Asia	Male	35-39 years	Tobacco	Number	2021	1032.655883751915	1561.4513181878535	614.4987045739019
DALYs (Disability-Adjusted Life Years)	East Asia	Female	35-39 years	Tobacco	Number	2021	5.757581631411146	11.161854978809156	2.479067105843111
DALYs (Disability-Adjusted Life Years)	East Asia	Both	35-39 years	Tobacco	Number	2021	1038.413465383325	1570.7117236568436	617.0216200820502
DALYs (Disability-Adjusted Life Years)	East Asia	Male	35-39 years	Tobacco	Percent	2021	0.0536221096854737	0.0749915194315254	0.0347796788046631
DALYs (Disability-Adjusted Life Years)	East Asia	Female	35-39 years	Tobacco	Percent	2021	0.0013338091670625	0.0025375266914666	0.0005907412893143
DALYs (Disability-Adjusted Life Years)	East Asia	Both	35-39 years	Tobacco	Percent	2021	0.0439663240076557	0.0608085569363313	0.0278349791385032
DALYs (Disability-Adjusted Life Years)	East Asia	Male	35-39 years	Tobacco	Rate	2021	1.83263	2.77107	1.09054
DALYs (Disability-Adjusted Life Years)	East Asia	Female	35-39 years	Tobacco	Rate	2021	0.0107789	0.0208963	0.00464111
DALYs (Disability-Adjusted Life Years)	East Asia	Both	35-39 years	Tobacco	Rate	2021	0.946045	1.43099	0.562137
DALYs (Disability-Adjusted Life Years)	Global	Male	15-39 years	Tobacco	Number	1990	2953.728099879148	4060.7612705803504	1922.9817775856104
DALYs (Disability-Adjusted Life Years)	Global	Female	15-39 years	Tobacco	Number	1990	478.6257656870764	668.3469671130188	303.25459998245435
DALYs (Disability-Adjusted Life Years)	Global	Both	15-39 years	Tobacco	Number	1990	3432.353865566223	4678.088037949481	2212.807855571116
DALYs (Disability-Adjusted Life Years)	Global	Male	15-39 years	Tobacco	Percent	1990	0.033235548379418	0.0454711253177664	0.0215972292457871
DALYs (Disability-Adjusted Life Years)	Global	Female	15-39 years	Tobacco	Percent	1990	0.0083476556947604	0.0117141464739016	0.0051824359992405
DALYs (Disability-Adjusted Life Years)	Global	Both	15-39 years	Tobacco	Percent	1990	0.0234615218255759	0.0318921864622877	0.0152769750019841
DALYs (Disability-Adjusted Life Years)	Global	Male	15-39 years	Tobacco	Rate	1990	0.266471	0.36634187156000003	0.173482
DALYs (Disability-Adjusted Life Years)	Global	Female	15-39 years	Tobacco	Rate	1990	0.0441807	0.0616934	0.0279927
DALYs (Disability-Adjusted Life Years)	Global	Both	15-39 years	Tobacco	Rate	1990	0.1566	0.213436	0.100959
DALYs (Disability-Adjusted Life Years)	Global	Male	15-39 years	Tobacco	Number	1991	3013.5868337145803	4109.186928736665	1942.46202308155
DALYs (Disability-Adjusted Life Years)	Global	Female	15-39 years	Tobacco	Number	1991	477.1000675238251	667.3242375146947	303.24233850280666
DALYs (Disability-Adjusted Life Years)	Global	Both	15-39 years	Tobacco	Number	1991	3490.686901238404	4760.210297434385	2259.1369926605853
DALYs (Disability-Adjusted Life Years)	Global	Male	15-39 years	Tobacco	Percent	1991	0.0331884885855635	0.0453434418127235	0.021605784431391
DALYs (Disability-Adjusted Life Years)	Global	Female	15-39 years	Tobacco	Percent	1991	0.0082539858559098	0.0114722916117599	0.005201526527891
DALYs (Disability-Adjusted Life Years)	Global	Both	15-39 years	Tobacco	Percent	1991	0.0234771829619501	0.0319572980819614	0.0152710955382577
DALYs (Disability-Adjusted Life Years)	Global	Male	15-39 years	Tobacco	Rate	1991	0.268032	0.365476	0.172765
DALYs (Disability-Adjusted Life Years)	Global	Female	15-39 years	Tobacco	Rate	1991	0.0434348	0.0607527	0.027606963720000002
DALYs (Disability-Adjusted Life Years)	Global	Both	15-39 years	Tobacco	Rate	1991	0.157042	0.214157	0.101636
DALYs (Disability-Adjusted Life Years)	Global	Male	15-39 years	Tobacco	Number	1992	3092.992859524737	4216.939506341465	1980.2405735553853
DALYs (Disability-Adjusted Life Years)	Global	Female	15-39 years	Tobacco	Number	1992	475.8781082732096	665.1782143731095	302.8066388622863
DALYs (Disability-Adjusted Life Years)	Global	Both	15-39 years	Tobacco	Number	1992	3568.87096779795	4839.608238170387	2281.281175377966
DALYs (Disability-Adjusted Life Years)	Global	Male	15-39 years	Tobacco	Percent	1992	0.0334376368119618	0.0454870633363884	0.0217854394506261
DALYs (Disability-Adjusted Life Years)	Global	Female	15-39 years	Tobacco	Percent	1992	0.0081530763889954	0.0113333929733339	0.0052598993896407
DALYs (Disability-Adjusted Life Years)	Global	Both	15-39 years	Tobacco	Percent	1992	0.0236448395200243	0.0323060469642096	0.0153652101437537
DALYs (Disability-Adjusted Life Years)	Global	Male	15-39 years	Tobacco	Rate	1992	0.271474	0.370123	0.173807
DALYs (Disability-Adjusted Life Years)	Global	Female	15-39 years	Tobacco	Rate	1992	0.0427625	0.0597731	0.0272103
DALYs (Disability-Adjusted Life Years)	Global	Both	15-39 years	Tobacco	Rate	1992	0.158463	0.214886	0.101292
DALYs (Disability-Adjusted Life Years)	Global	Male	15-39 years	Tobacco	Number	1993	3181.634631209314	4314.457881796543	2055.316511841188
DALYs (Disability-Adjusted Life Years)	Global	Female	15-39 years	Tobacco	Number	1993	482.9735493423865	670.0622203715105	308.3459493519031
DALYs (Disability-Adjusted Life Years)	Global	Both	15-39 years	Tobacco	Number	1993	3664.6081805517	4952.051939727208	2372.184105430845
DALYs (Disability-Adjusted Life Years)	Global	Male	15-39 years	Tobacco	Percent	1993	0.0337007552764565	0.0459025666740192	0.0220091972112939
DALYs (Disability-Adjusted Life Years)	Global	Female	15-39 years	Tobacco	Percent	1993	0.0081762325709858	0.0116180696154852	0.0052343285029328
DALYs (Disability-Adjusted Life Years)	Global	Both	15-39 years	Tobacco	Percent	1993	0.0238664100510044	0.0324321018778355	0.0154722209305361
DALYs (Disability-Adjusted Life Years)	Global	Male	15-39 years	Tobacco	Rate	1993	0.275883	0.374111	0.178219
DALYs (Disability-Adjusted Life Years)	Global	Female	15-39 years	Tobacco	Rate	1993	0.0428692	0.059475339200000005	0.0273691
DALYs (Disability-Adjusted Life Years)	Global	Both	15-39 years	Tobacco	Rate	1993	0.160737	0.217207	0.104049
DALYs (Disability-Adjusted Life Years)	Global	Male	15-39 years	Tobacco	Number	1994	3151.6138418317823	4279.65740377792	2058.9142580979037
DALYs (Disability-Adjusted Life Years)	Global	Female	15-39 years	Tobacco	Number	1994	493.4718770961574	683.228775578929	314.38667930117026
DALYs (Disability-Adjusted Life Years)	Global	Both	15-39 years	Tobacco	Number	1994	3645.085718927939	4954.0931367639605	2375.3044943290824
DALYs (Disability-Adjusted Life Years)	Global	Male	15-39 years	Tobacco	Percent	1994	0.0334066149982447	0.0454760849564992	0.0218976479374013
DALYs (Disability-Adjusted Life Years)	Global	Female	15-39 years	Tobacco	Percent	1994	0.0082630370257082	0.0115735366310848	0.0052263099211266
DALYs (Disability-Adjusted Life Years)	Global	Both	15-39 years	Tobacco	Percent	1994	0.0236515434263092	0.0322443656178425	0.0153850416602393
DALYs (Disability-Adjusted Life Years)	Global	Male	15-39 years	Tobacco	Rate	1994	0.270284	0.367025	0.176573
DALYs (Disability-Adjusted Life Years)	Global	Female	15-39 years	Tobacco	Rate	1994	0.0432895	0.059935822039999996	0.0275794
DALYs (Disability-Adjusted Life Years)	Global	Both	15-39 years	Tobacco	Rate	1994	0.158072	0.214838	0.103007
DALYs (Disability-Adjusted Life Years)	Global	Male	15-39 years	Tobacco	Number	1995	3113.107227188158	4250.0027550901705	2031.164361869488
DALYs (Disability-Adjusted Life Years)	Global	Female	15-39 years	Tobacco	Number	1995	506.04830427535865	702.3040664747471	321.7117723770622
DALYs (Disability-Adjusted Life Years)	Global	Both	15-39 years	Tobacco	Number	1995	3619.1555314635175	4930.587214158777	2353.4848394266864
DALYs (Disability-Adjusted Life Years)	Global	Male	15-39 years	Tobacco	Percent	1995	0.0331919245286862	0.0454581532347051	0.0217696607614163
DALYs (Disability-Adjusted Life Years)	Global	Female	15-39 years	Tobacco	Percent	1995	0.0084284028168452	0.0119372048310808	0.0053225620769763
DALYs (Disability-Adjusted Life Years)	Global	Both	15-39 years	Tobacco	Percent	1995	0.0235194701401919	0.0323054640650426	0.0152775938458379
DALYs (Disability-Adjusted Life Years)	Global	Male	15-39 years	Tobacco	Rate	1995	0.26412630047999996	0.360584	0.172331
DALYs (Disability-Adjusted Life Years)	Global	Female	15-39 years	Tobacco	Rate	1995	0.0438784	0.0608954	0.027895
DALYs (Disability-Adjusted Life Years)	Global	Both	15-39 years	Tobacco	Rate	1995	0.15519939672000002	0.211437	0.100924
DALYs (Disability-Adjusted Life Years)	Global	Male	15-39 years	Tobacco	Number	1996	3073.195929855216	4177.638638802371	1998.6858461601355
DALYs (Disability-Adjusted Life Years)	Global	Female	15-39 years	Tobacco	Number	1996	487.00647859327177	672.6787830215915	310.94123707658434
DALYs (Disability-Adjusted Life Years)	Global	Both	15-39 years	Tobacco	Number	1996	3560.2024084484906	4848.880416950464	2309.5352694526846
DALYs (Disability-Adjusted Life Years)	Global	Male	15-39 years	Tobacco	Percent	1996	0.0326689881099056	0.0445736087587554	0.0215091914809993
DALYs (Disability-Adjusted Life Years)	Global	Female	15-39 years	Tobacco	Percent	1996	0.0081782503900978	0.0114836338189863	0.0051699605816091
DALYs (Disability-Adjusted Life Years)	Global	Both	15-39 years	Tobacco	Percent	1996	0.0231684429411529	0.0318938379512693	0.01502638044735
DALYs (Disability-Adjusted Life Years)	Global	Male	15-39 years	Tobacco	Rate	1996	0.257829	0.350487	0.167682
DALYs (Disability-Adjusted Life Years)	Global	Female	15-39 years	Tobacco	Rate	1996	0.041715896700000005	0.0576202	0.026634537929999997
DALYs (Disability-Adjusted Life Years)	Global	Both	15-39 years	Tobacco	Rate	1996	0.15089513222999998	0.20551428479000003	0.097887
DALYs (Disability-Adjusted Life Years)	Global	Male	15-39 years	Tobacco	Number	1997	3024.916894693677	4103.99864451734	1968.1441288631468
DALYs (Disability-Adjusted Life Years)	Global	Female	15-39 years	Tobacco	Number	1997	475.2022864292309	659.5176816920016	304.2350514877388
DALYs (Disability-Adjusted Life Years)	Global	Both	15-39 years	Tobacco	Number	1997	3500.119181122908	4773.1556870335335	2270.076006729942
DALYs (Disability-Adjusted Life Years)	Global	Male	15-39 years	Tobacco	Percent	1997	0.0322446643177506	0.0438504803375384	0.0211704542081681
DALYs (Disability-Adjusted Life Years)	Global	Female	15-39 years	Tobacco	Percent	1997	0.0079971561537476	0.011198236822752	0.0050601774800748
DALYs (Disability-Adjusted Life Years)	Global	Both	15-39 years	Tobacco	Percent	1997	0.0228349595204448	0.0313914293283639	0.0149026308505091
DALYs (Disability-Adjusted Life Years)	Global	Male	15-39 years	Tobacco	Rate	1997	0.25078913946000003	0.34025341000000003	0.16317445720999998
DALYs (Disability-Adjusted Life Years)	Global	Female	15-39 years	Tobacco	Rate	1997	0.0401838	0.0557698	0.0257266
DALYs (Disability-Adjusted Life Years)	Global	Both	15-39 years	Tobacco	Rate	1997	0.146526	0.19982	0.0950327
DALYs (Disability-Adjusted Life Years)	Global	Male	15-39 years	Tobacco	Number	1998	3023.8076909766087	4140.531148792579	1973.008816472146
DALYs (Disability-Adjusted Life Years)	Global	Female	15-39 years	Tobacco	Number	1998	472.79077610399554	655.4287070364978	301.587164272241
DALYs (Disability-Adjusted Life Years)	Global	Both	15-39 years	Tobacco	Number	1998	3496.598467080601	4789.298686532427	2263.221557402356
DALYs (Disability-Adjusted Life Years)	Global	Male	15-39 years	Tobacco	Percent	1998	0.0318060462126649	0.0433483037163974	0.020783467708803
DALYs (Disability-Adjusted Life Years)	Global	Female	15-39 years	Tobacco	Percent	1998	0.0078199817878305	0.0111115743560249	0.004954228989295
DALYs (Disability-Adjusted Life Years)	Global	Both	15-39 years	Tobacco	Percent	1998	0.02247658875904	0.0307686042668068	0.0144832062302801
DALYs (Disability-Adjusted Life Years)	Global	Male	15-39 years	Tobacco	Rate	1998	0.24746618984000002	0.338858	0.16146958544999998
DALYs (Disability-Adjusted Life Years)	Global	Female	15-39 years	Tobacco	Rate	1998	0.0394285	0.054659594469999996	0.025150915609999998
DALYs (Disability-Adjusted Life Years)	Global	Both	15-39 years	Tobacco	Rate	1998	0.144427	0.19782173083000001	0.0934822
DALYs (Disability-Adjusted Life Years)	Global	Male	15-39 years	Tobacco	Number	1999	3015.6228343883845	4105.122453505427	1970.648313026856
DALYs (Disability-Adjusted Life Years)	Global	Female	15-39 years	Tobacco	Number	1999	447.8074176838877	621.082469343487	287.23954514177126
DALYs (Disability-Adjusted Life Years)	Global	Both	15-39 years	Tobacco	Number	1999	3463.430252072268	4739.26629861469	2247.266285047346
DALYs (Disability-Adjusted Life Years)	Global	Male	15-39 years	Tobacco	Percent	1999	0.0312715165941513	0.0425100661298704	0.0203973985724069
DALYs (Disability-Adjusted Life Years)	Global	Female	15-39 years	Tobacco	Percent	1999	0.0073533962354179	0.0102792941170217	0.0046223353028646
DALYs (Disability-Adjusted Life Years)	Global	Both	15-39 years	Tobacco	Percent	1999	0.0220080411155453	0.0301671382407125	0.0141801246452783
DALYs (Disability-Adjusted Life Years)	Global	Male	15-39 years	Tobacco	Rate	1999	0.243392	0.331326	0.15905197192999998
DALYs (Disability-Adjusted Life Years)	Global	Female	15-39 years	Tobacco	Rate	1999	0.0368012	0.0510412	0.0236056
DALYs (Disability-Adjusted Life Years)	Global	Both	15-39 years	Tobacco	Rate	1999	0.141029	0.192981	0.0915077
DALYs (Disability-Adjusted Life Years)	Global	Male	15-39 years	Tobacco	Number	2000	3048.223726548804	4170.012255048307	2010.615675484331
DALYs (Disability-Adjusted Life Years)	Global	Female	15-39 years	Tobacco	Number	2000	433.4221263977459	602.4248993784677	278.14500411391384
DALYs (Disability-Adjusted Life Years)	Global	Both	15-39 years	Tobacco	Number	2000	3481.645852946548	4770.029403110191	2294.6284684448565
DALYs (Disability-Adjusted Life Years)	Global	Male	15-39 years	Tobacco	Percent	2000	0.0306868757854713	0.0416127378206196	0.0201851691210232
DALYs (Disability-Adjusted Life Years)	Global	Female	15-39 years	Tobacco	Percent	2000	0.0069543636042196	0.0098543466591829	0.0044259404963572
DALYs (Disability-Adjusted Life Years)	Global	Both	15-39 years	Tobacco	Percent	2000	0.0215314647288424	0.0293023604832713	0.0141306640313543
DALYs (Disability-Adjusted Life Years)	Global	Male	15-39 years	Tobacco	Rate	2000	0.242522	0.331773	0.159968
DALYs (Disability-Adjusted Life Years)	Global	Female	15-39 years	Tobacco	Rate	2000	0.0350909	0.048773795019999996	0.0225193
DALYs (Disability-Adjusted Life Years)	Global	Both	15-39 years	Tobacco	Rate	2000	0.139711	0.191412	0.09207880630000001
DALYs (Disability-Adjusted Life Years)	Global	Male	15-39 years	Tobacco	Number	2001	3117.236853116479	4262.869719146122	2051.253732426593
DALYs (Disability-Adjusted Life Years)	Global	Female	15-39 years	Tobacco	Number	2001	418.7662811258934	578.2970196007213	270.33233386173083
DALYs (Disability-Adjusted Life Years)	Global	Both	15-39 years	Tobacco	Number	2001	3536.00313424237	4857.899930823297	2314.1052846511866
DALYs (Disability-Adjusted Life Years)	Global	Male	15-39 years	Tobacco	Percent	2001	0.0305446499992065	0.0413550946374446	0.0201225302149904
DALYs (Disability-Adjusted Life Years)	Global	Female	15-39 years	Tobacco	Percent	2001	0.0065499712739929	0.0092940352134093	0.0041121990612359
DALYs (Disability-Adjusted Life Years)	Global	Both	15-39 years	Tobacco	Percent	2001	0.0212971199132917	0.0291232235153999	0.0139293297324109
DALYs (Disability-Adjusted Life Years)	Global	Male	15-39 years	Tobacco	Rate	2001	0.24445395335999998	0.334295	0.16085947519000002
DALYs (Disability-Adjusted Life Years)	Global	Female	15-39 years	Tobacco	Rate	2001	0.033407013320000005	0.0461336	0.0215657
DALYs (Disability-Adjusted Life Years)	Global	Both	15-39 years	Tobacco	Rate	2001	0.139834	0.19210967915000002	0.0915132
DALYs (Disability-Adjusted Life Years)	Global	Male	15-39 years	Tobacco	Number	2002	3223.634037918421	4387.468595612414	2109.8071724008537
DALYs (Disability-Adjusted Life Years)	Global	Female	15-39 years	Tobacco	Number	2002	406.5659368525433	559.5593463081766	261.2680955842538
DALYs (Disability-Adjusted Life Years)	Global	Both	15-39 years	Tobacco	Number	2002	3630.1999747709615	4955.546831597863	2377.9453779032424
DALYs (Disability-Adjusted Life Years)	Global	Male	15-39 years	Tobacco	Percent	2002	0.0305531297540134	0.0414836634105322	0.0200966866845879
DALYs (Disability-Adjusted Life Years)	Global	Female	15-39 years	Tobacco	Percent	2002	0.006222552512674	0.0087571451331268	0.00392081114516
DALYs (Disability-Adjusted Life Years)	Global	Both	15-39 years	Tobacco	Percent	2002	0.0212422924968328	0.0289368533948652	0.0139836140342107
DALYs (Disability-Adjusted Life Years)	Global	Male	15-39 years	Tobacco	Rate	2002	0.24931	0.339319	0.163169
DALYs (Disability-Adjusted Life Years)	Global	Female	15-39 years	Tobacco	Rate	2002	0.0319821	0.0440172	0.0205524
DALYs (Disability-Adjusted Life Years)	Global	Both	15-39 years	Tobacco	Rate	2002	0.14157	0.193255	0.0927345
DALYs (Disability-Adjusted Life Years)	Global	Male	15-39 years	Tobacco	Number	2003	3288.314813643741	4504.961702612589	2136.484794567576
DALYs (Disability-Adjusted Life Years)	Global	Female	15-39 years	Tobacco	Number	2003	385.4444590605623	531.5314022868714	248.1884041216512
DALYs (Disability-Adjusted Life Years)	Global	Both	15-39 years	Tobacco	Number	2003	3673.759272704304	5031.106453091215	2392.92513344389
DALYs (Disability-Adjusted Life Years)	Global	Male	15-39 years	Tobacco	Percent	2003	0.029973628088732	0.0407194974164042	0.0196962789292295
DALYs (Disability-Adjusted Life Years)	Global	Female	15-39 years	Tobacco	Percent	2003	0.0058413531453283	0.0081913192242985	0.0036924340451116
DALYs (Disability-Adjusted Life Years)	Global	Both	15-39 years	Tobacco	Percent	2003	0.0209046280248264	0.0285401279071993	0.0136744539818106
DALYs (Disability-Adjusted Life Years)	Global	Male	15-39 years	Tobacco	Rate	2003	0.251071	0.343965	0.163126
DALYs (Disability-Adjusted Life Years)	Global	Female	15-39 years	Tobacco	Rate	2003	0.029934988989999998	0.0412806	0.0192752
DALYs (Disability-Adjusted Life Years)	Global	Both	15-39 years	Tobacco	Rate	2003	0.14144426227999998	0.193704	0.09213056845999999
DALYs (Disability-Adjusted Life Years)	Global	Male	15-39 years	Tobacco	Number	2004	3283.901313129128	4482.468685166965	2137.336215505772
DALYs (Disability-Adjusted Life Years)	Global	Female	15-39 years	Tobacco	Number	2004	371.8644243624124	512.231421031152	237.6099306894532
DALYs (Disability-Adjusted Life Years)	Global	Both	15-39 years	Tobacco	Number	2004	3655.765737491539	4996.791573116091	2382.108233556494
DALYs (Disability-Adjusted Life Years)	Global	Male	15-39 years	Tobacco	Percent	2004	0.0295374323797466	0.0400704703742012	0.0194291634133575
DALYs (Disability-Adjusted Life Years)	Global	Female	15-39 years	Tobacco	Percent	2004	0.0056020726642923	0.0077871594951135	0.0035152118247516
DALYs (Disability-Adjusted Life Years)	Global	Both	15-39 years	Tobacco	Percent	2004	0.0205845510735369	0.028050251303856	0.0136071686721518
DALYs (Disability-Adjusted Life Years)	Global	Male	15-39 years	Tobacco	Rate	2004	0.247726	0.338142	0.161233
DALYs (Disability-Adjusted Life Years)	Global	Female	15-39 years	Tobacco	Rate	2004	0.028537556690000004	0.039309576980000004	0.0182346
DALYs (Disability-Adjusted Life Years)	Global	Both	15-39 years	Tobacco	Rate	2004	0.139072	0.190087	0.0906197
DALYs (Disability-Adjusted Life Years)	Global	Male	15-39 years	Tobacco	Number	2005	3266.1571181233394	4447.634261011094	2101.7985851824906
DALYs (Disability-Adjusted Life Years)	Global	Female	15-39 years	Tobacco	Number	2005	366.1735368427259	506.4793302872668	233.5843248150012
DALYs (Disability-Adjusted Life Years)	Global	Both	15-39 years	Tobacco	Number	2005	3632.330654966066	4948.177600502475	2345.136225393616
DALYs (Disability-Adjusted Life Years)	Global	Male	15-39 years	Tobacco	Percent	2005	0.0289989606674905	0.0392696376360831	0.0191220402411001
DALYs (Disability-Adjusted Life Years)	Global	Female	15-39 years	Tobacco	Percent	2005	0.0054846004518597	0.0075866071454415	0.0035149167617635
DALYs (Disability-Adjusted Life Years)	Global	Both	15-39 years	Tobacco	Percent	2005	0.0202433210182674	0.0275816685961356	0.013297256402388
DALYs (Disability-Adjusted Life Years)	Global	Male	15-39 years	Tobacco	Rate	2005	0.243599	0.331717	0.156758
DALYs (Disability-Adjusted Life Years)	Global	Female	15-39 years	Tobacco	Rate	2005	0.027788006230000002	0.0384355	0.017726138080000002
DALYs (Disability-Adjusted Life Years)	Global	Both	15-39 years	Tobacco	Rate	2005	0.136629	0.18612454677999998	0.08821175234999999
DALYs (Disability-Adjusted Life Years)	Global	Male	15-39 years	Tobacco	Number	2006	3201.4185687089757	4367.222415817212	2030.7236623188696
DALYs (Disability-Adjusted Life Years)	Global	Female	15-39 years	Tobacco	Number	2006	348.0983093801761	480.3563114967715	221.99963858499297
DALYs (Disability-Adjusted Life Years)	Global	Both	15-39 years	Tobacco	Number	2006	3549.5168780891504	4826.445078562589	2259.143103889445
DALYs (Disability-Adjusted Life Years)	Global	Male	15-39 years	Tobacco	Percent	2006	0.0283802125928768	0.0383776540228193	0.0186292506677776
DALYs (Disability-Adjusted Life Years)	Global	Female	15-39 years	Tobacco	Percent	2006	0.0052326937021658	0.007237094084876	0.0033068559628062
DALYs (Disability-Adjusted Life Years)	Global	Both	15-39 years	Tobacco	Percent	2006	0.0197888468627417	0.0269087664172161	0.0129078369348667
DALYs (Disability-Adjusted Life Years)	Global	Male	15-39 years	Tobacco	Rate	2006	0.23621	0.322227	0.14983283623000002
DALYs (Disability-Adjusted Life Years)	Global	Female	15-39 years	Tobacco	Rate	2006	0.026142789899999998	0.0360756	0.0166726
DALYs (Disability-Adjusted Life Years)	Global	Both	15-39 years	Tobacco	Rate	2006	0.132107	0.179632	0.0840814
DALYs (Disability-Adjusted Life Years)	Global	Male	15-39 years	Tobacco	Number	2007	3191.677419070875	4368.691347829656	2069.7282900046343
DALYs (Disability-Adjusted Life Years)	Global	Female	15-39 years	Tobacco	Number	2007	330.5051922799559	455.4604333365719	210.4329901371228
DALYs (Disability-Adjusted Life Years)	Global	Both	15-39 years	Tobacco	Number	2007	3522.1826113508287	4818.261514177959	2287.2020623310077
DALYs (Disability-Adjusted Life Years)	Global	Male	15-39 years	Tobacco	Percent	2007	0.0278589898532259	0.0375273962842568	0.0184226325691195
DALYs (Disability-Adjusted Life Years)	Global	Female	15-39 years	Tobacco	Percent	2007	0.0049906218385795	0.0069795405510257	0.0031744709604465
DALYs (Disability-Adjusted Life Years)	Global	Both	15-39 years	Tobacco	Percent	2007	0.0194778997029545	0.0265492808789504	0.0128315926497731
DALYs (Disability-Adjusted Life Years)	Global	Male	15-39 years	Tobacco	Rate	2007	0.23318206298000002	0.319174	0.151213
DALYs (Disability-Adjusted Life Years)	Global	Female	15-39 years	Tobacco	Rate	2007	0.024589506320000003	0.0338861	0.0156562
DALYs (Disability-Adjusted Life Years)	Global	Both	15-39 years	Tobacco	Rate	2007	0.129834	0.17761	0.0843103
DALYs (Disability-Adjusted Life Years)	Global	Male	15-39 years	Tobacco	Number	2008	3167.827510734635	4271.928613125319	2064.7171760871643
DALYs (Disability-Adjusted Life Years)	Global	Female	15-39 years	Tobacco	Number	2008	323.97027488999726	445.7647218716001	207.4206261510163
DALYs (Disability-Adjusted Life Years)	Global	Both	15-39 years	Tobacco	Number	2008	3491.797785624632	4714.191571494644	2285.5766182941807
DALYs (Disability-Adjusted Life Years)	Global	Male	15-39 years	Tobacco	Percent	2008	0.0272933327908274	0.0366721691792828	0.0180406975437801
DALYs (Disability-Adjusted Life Years)	Global	Female	15-39 years	Tobacco	Percent	2008	0.0048309332296853	0.006753372612015	0.0030783783558812
DALYs (Disability-Adjusted Life Years)	Global	Both	15-39 years	Tobacco	Percent	2008	0.0190637287302202	0.025872486706401	0.0126235297162506
DALYs (Disability-Adjusted Life Years)	Global	Male	15-39 years	Tobacco	Rate	2008	0.229246	0.309146	0.149417
DALYs (Disability-Adjusted Life Years)	Global	Female	15-39 years	Tobacco	Rate	2008	0.0238906	0.0328721	0.0152959
DALYs (Disability-Adjusted Life Years)	Global	Both	15-39 years	Tobacco	Rate	2008	0.127535	0.172182	0.08347904673999999
DALYs (Disability-Adjusted Life Years)	Global	Male	15-39 years	Tobacco	Number	2009	3140.5126692078525	4243.359879832255	2026.907263343312
DALYs (Disability-Adjusted Life Years)	Global	Female	15-39 years	Tobacco	Number	2009	318.45564294547535	436.4407815286672	203.4434256810632
DALYs (Disability-Adjusted Life Years)	Global	Both	15-39 years	Tobacco	Number	2009	3458.968312153326	4674.550371739104	2238.3533095856565
DALYs (Disability-Adjusted Life Years)	Global	Male	15-39 years	Tobacco	Percent	2009	0.0265891867740448	0.0356852478224205	0.017583371789007
DALYs (Disability-Adjusted Life Years)	Global	Female	15-39 years	Tobacco	Percent	2009	0.0046508180390479	0.0065259977028727	0.0029776006179074
DALYs (Disability-Adjusted Life Years)	Global	Both	15-39 years	Tobacco	Percent	2009	0.0185348482791452	0.0251594192160698	0.0122332156978266
DALYs (Disability-Adjusted Life Years)	Global	Male	15-39 years	Tobacco	Rate	2009	0.225243	0.30434072568000003	0.14537311113999998
DALYs (Disability-Adjusted Life Years)	Global	Female	15-39 years	Tobacco	Rate	2009	0.0232876	0.0319155	0.0148772
DALYs (Disability-Adjusted Life Years)	Global	Both	15-39 years	Tobacco	Rate	2009	0.12524475572000002	0.169259	0.0810479
DALYs (Disability-Adjusted Life Years)	Global	Male	15-39 years	Tobacco	Number	2010	3098.996032146779	4212.071218185477	2014.592938494223
DALYs (Disability-Adjusted Life Years)	Global	Female	15-39 years	Tobacco	Number	2010	301.76194447914025	414.5374136839307	192.1185476868366
DALYs (Disability-Adjusted Life Years)	Global	Both	15-39 years	Tobacco	Number	2010	3400.7579766259173	4616.227991606604	2202.409167583525
DALYs (Disability-Adjusted Life Years)	Global	Male	15-39 years	Tobacco	Percent	2010	0.0259165951170647	0.0347111733984224	0.0171372524859318
DALYs (Disability-Adjusted Life Years)	Global	Female	15-39 years	Tobacco	Percent	2010	0.0043871980733012	0.0060873578568058	0.0027770567110282
DALYs (Disability-Adjusted Life Years)	Global	Both	15-39 years	Tobacco	Percent	2010	0.018051500142854	0.0244554203317828	0.0117353376337562
DALYs (Disability-Adjusted Life Years)	Global	Male	15-39 years	Tobacco	Rate	2010	0.220644	0.299893	0.143436
DALYs (Disability-Adjusted Life Years)	Global	Female	15-39 years	Tobacco	Rate	2010	0.0219062	0.030093	0.0139467
DALYs (Disability-Adjusted Life Years)	Global	Both	15-39 years	Tobacco	Rate	2010	0.12223946330999999	0.165929	0.07916509097999999
DALYs (Disability-Adjusted Life Years)	Global	Male	15-39 years	Tobacco	Number	2011	2988.208376870072	4108.928459632643	1936.7854742197624
DALYs (Disability-Adjusted Life Years)	Global	Female	15-39 years	Tobacco	Number	2011	294.1542934027312	405.27481388373417	187.0195965450613
DALYs (Disability-Adjusted Life Years)	Global	Both	15-39 years	Tobacco	Number	2011	3282.362670272804	4509.613948174358	2125.6295628762487
DALYs (Disability-Adjusted Life Years)	Global	Male	15-39 years	Tobacco	Percent	2011	0.0251481576072918	0.0340250839622903	0.016523207483381
DALYs (Disability-Adjusted Life Years)	Global	Female	15-39 years	Tobacco	Percent	2011	0.0042666358735251	0.0058723987702314	0.0027180508773701
DALYs (Disability-Adjusted Life Years)	Global	Both	15-39 years	Tobacco	Percent	2011	0.017477516175619	0.0239685836678677	0.0113965493847471
DALYs (Disability-Adjusted Life Years)	Global	Male	15-39 years	Tobacco	Rate	2011	0.21143962031000002	0.29074	0.137043
DALYs (Disability-Adjusted Life Years)	Global	Female	15-39 years	Tobacco	Rate	2011	0.0212205	0.0292368	0.013491714049999999
DALYs (Disability-Adjusted Life Years)	Global	Both	15-39 years	Tobacco	Rate	2011	0.11725	0.16108933582999999	0.07593028104999999
DALYs (Disability-Adjusted Life Years)	Global	Male	15-39 years	Tobacco	Number	2012	2880.9663343571333	3979.72124290352	1860.361307467727
DALYs (Disability-Adjusted Life Years)	Global	Female	15-39 years	Tobacco	Number	2012	283.8342866951336	389.8623204036152	180.1263186887721
DALYs (Disability-Adjusted Life Years)	Global	Both	15-39 years	Tobacco	Number	2012	3164.8006210522703	4362.351489893683	2031.9596669668333
DALYs (Disability-Adjusted Life Years)	Global	Male	15-39 years	Tobacco	Percent	2012	0.0243935955662902	0.0329701835300879	0.0160473084338222
DALYs (Disability-Adjusted Life Years)	Global	Female	15-39 years	Tobacco	Percent	2012	0.0041311860761438	0.0057275983455518	0.0026465512053666
DALYs (Disability-Adjusted Life Years)	Global	Both	15-39 years	Tobacco	Percent	2012	0.0169363670602285	0.0231132460449562	0.0111204075135633
DALYs (Disability-Adjusted Life Years)	Global	Male	15-39 years	Tobacco	Rate	2012	0.202617	0.279892	0.130839
DALYs (Disability-Adjusted Life Years)	Global	Female	15-39 years	Tobacco	Rate	2012	0.0203565	0.0279608	0.0129186
DALYs (Disability-Adjusted Life Years)	Global	Both	15-39 years	Tobacco	Rate	2012	0.112379	0.154902	0.0721527
DALYs (Disability-Adjusted Life Years)	Global	Male	15-39 years	Tobacco	Number	2013	2833.4916593166004	3950.375794717715	1824.72934489588
DALYs (Disability-Adjusted Life Years)	Global	Female	15-39 years	Tobacco	Number	2013	278.78661942795753	384.2937606039489	176.64458368188536
DALYs (Disability-Adjusted Life Years)	Global	Both	15-39 years	Tobacco	Number	2013	3112.27827874456	4320.948164307425	2000.822579126432
DALYs (Disability-Adjusted Life Years)	Global	Male	15-39 years	Tobacco	Percent	2013	0.0237453124959843	0.0323500665067394	0.0156118473477862
DALYs (Disability-Adjusted Life Years)	Global	Female	15-39 years	Tobacco	Percent	2013	0.004059696988734	0.0056743621462329	0.0026056154416679
DALYs (Disability-Adjusted Life Years)	Global	Both	15-39 years	Tobacco	Percent	2013	0.0165495772449854	0.0227255309354763	0.0107936150299137
DALYs (Disability-Adjusted Life Years)	Global	Male	15-39 years	Tobacco	Rate	2013	0.19806801879000002	0.276141	0.127553
DALYs (Disability-Adjusted Life Years)	Global	Female	15-39 years	Tobacco	Rate	2013	0.0198845	0.0274098	0.0125992
DALYs (Disability-Adjusted Life Years)	Global	Both	15-39 years	Tobacco	Rate	2013	0.109874	0.152544	0.0706356
DALYs (Disability-Adjusted Life Years)	Global	Male	15-39 years	Tobacco	Number	2014	2884.3415556547025	3975.794003750432	1839.798117020664
DALYs (Disability-Adjusted Life Years)	Global	Female	15-39 years	Tobacco	Number	2014	266.22520817181265	368.08760566850265	169.04964676432303
DALYs (Disability-Adjusted Life Years)	Global	Both	15-39 years	Tobacco	Number	2014	3150.5667638265177	4321.254775668402	2003.7987174075752
DALYs (Disability-Adjusted Life Years)	Global	Male	15-39 years	Tobacco	Percent	2014	0.0234418924613659	0.031785221301446	0.0154241740225738
DALYs (Disability-Adjusted Life Years)	Global	Female	15-39 years	Tobacco	Percent	2014	0.0039063722599565	0.0054231175230564	0.0025053424856997
DALYs (Disability-Adjusted Life Years)	Global	Both	15-39 years	Tobacco	Percent	2014	0.0164722804983231	0.0225604180184972	0.010711275188335
DALYs (Disability-Adjusted Life Years)	Global	Male	15-39 years	Tobacco	Rate	2014	0.200371	0.276193	0.127808
DALYs (Disability-Adjusted Life Years)	Global	Female	15-39 years	Tobacco	Rate	2014	0.0188874	0.0261141	0.0119933
DALYs (Disability-Adjusted Life Years)	Global	Both	15-39 years	Tobacco	Rate	2014	0.110584	0.151674	0.0703325
DALYs (Disability-Adjusted Life Years)	Global	Male	15-39 years	Tobacco	Number	2015	2842.747809733288	3971.867884090224	1793.1426997379126
DALYs (Disability-Adjusted Life Years)	Global	Female	15-39 years	Tobacco	Number	2015	266.1917547252055	367.0287410189828	169.28340653685717
DALYs (Disability-Adjusted Life Years)	Global	Both	15-39 years	Tobacco	Number	2015	3108.939564458496	4340.554925068343	1968.180385963356
DALYs (Disability-Adjusted Life Years)	Global	Male	15-39 years	Tobacco	Percent	2015	0.0228697155984218	0.0311993610101326	0.015074778297258
DALYs (Disability-Adjusted Life Years)	Global	Female	15-39 years	Tobacco	Percent	2015	0.0038945753584881	0.0054201345028753	0.0024907250819154
DALYs (Disability-Adjusted Life Years)	Global	Both	15-39 years	Tobacco	Percent	2015	0.0161305285263222	0.0220737754627117	0.0105591796481301
DALYs (Disability-Adjusted Life Years)	Global	Male	15-39 years	Tobacco	Rate	2015	0.19618442961000002	0.27410754928000003	0.12374881674999999
DALYs (Disability-Adjusted Life Years)	Global	Female	15-39 years	Tobacco	Rate	2015	0.0187828	0.025898	0.0119448
DALYs (Disability-Adjusted Life Years)	Global	Both	15-39 years	Tobacco	Rate	2015	0.108468	0.151438	0.06866792605000001
DALYs (Disability-Adjusted Life Years)	Global	Male	15-39 years	Tobacco	Number	2016	2838.734171261835	3900.036086449213	1805.2542554641736
DALYs (Disability-Adjusted Life Years)	Global	Female	15-39 years	Tobacco	Number	2016	265.06895167711724	365.7460979040885	168.31820395607429
DALYs (Disability-Adjusted Life Years)	Global	Both	15-39 years	Tobacco	Number	2016	3103.8031229389526	4282.914785634754	1981.997021189384
DALYs (Disability-Adjusted Life Years)	Global	Male	15-39 years	Tobacco	Percent	2016	0.022422827462403	0.0306635684265411	0.0146197818883516
DALYs (Disability-Adjusted Life Years)	Global	Female	15-39 years	Tobacco	Percent	2016	0.0038216961576398	0.0053564217444811	0.0024366828457515
DALYs (Disability-Adjusted Life Years)	Global	Both	15-39 years	Tobacco	Percent	2016	0.0158320518672438	0.0218657053828939	0.0103100540947857
DALYs (Disability-Adjusted Life Years)	Global	Male	15-39 years	Tobacco	Rate	2016	0.194584	0.267332	0.12374302202000001
DALYs (Disability-Adjusted Life Years)	Global	Female	15-39 years	Tobacco	Rate	2016	0.0186007	0.0256655	0.0118114
DALYs (Disability-Adjusted Life Years)	Global	Both	15-39 years	Tobacco	Rate	2016	0.10762432485000001	0.14851	0.0687257
DALYs (Disability-Adjusted Life Years)	Global	Male	15-39 years	Tobacco	Number	2017	2803.712082024136	3925.834306731304	1748.6050236317624
DALYs (Disability-Adjusted Life Years)	Global	Female	15-39 years	Tobacco	Number	2017	262.4417219333972	365.3381326937914	165.154560270238
DALYs (Disability-Adjusted Life Years)	Global	Both	15-39 years	Tobacco	Number	2017	3066.153803957536	4290.066363193045	1933.6918269215853
DALYs (Disability-Adjusted Life Years)	Global	Male	15-39 years	Tobacco	Percent	2017	0.0219989859360763	0.0301875516070089	0.0142408093294596
DALYs (Disability-Adjusted Life Years)	Global	Female	15-39 years	Tobacco	Percent	2017	0.0037926235361646	0.0053087220186839	0.0023903167660953
DALYs (Disability-Adjusted Life Years)	Global	Both	15-39 years	Tobacco	Percent	2017	0.0155854928155567	0.0215542990534903	0.0100491193761468
DALYs (Disability-Adjusted Life Years)	Global	Male	15-39 years	Tobacco	Rate	2017	0.19086164662000002	0.26725	0.119036
DALYs (Disability-Adjusted Life Years)	Global	Female	15-39 years	Tobacco	Rate	2017	0.0183138	0.025494115150000003	0.0115249
DALYs (Disability-Adjusted Life Years)	Global	Both	15-39 years	Tobacco	Rate	2017	0.105656	0.147831	0.0666329
DALYs (Disability-Adjusted Life Years)	Global	Male	15-39 years	Tobacco	Number	2018	2825.9430809681344	3891.107332914371	1815.4645475833024
DALYs (Disability-Adjusted Life Years)	Global	Female	15-39 years	Tobacco	Number	2018	253.1307595802543	354.564920129253	158.99679267079594
DALYs (Disability-Adjusted Life Years)	Global	Both	15-39 years	Tobacco	Number	2018	3079.0738405483894	4219.102998822601	1980.3575235251171
DALYs (Disability-Adjusted Life Years)	Global	Male	15-39 years	Tobacco	Percent	2018	0.0218488794631611	0.0298871488993876	0.0143334251286423
DALYs (Disability-Adjusted Life Years)	Global	Female	15-39 years	Tobacco	Percent	2018	0.003636969619238	0.0050720869709395	0.0022693030256574
DALYs (Disability-Adjusted Life Years)	Global	Both	15-39 years	Tobacco	Percent	2018	0.0154708637888293	0.0214823543109223	0.0101430272547345
DALYs (Disability-Adjusted Life Years)	Global	Male	15-39 years	Tobacco	Rate	2018	0.191049	0.263059	0.122735
DALYs (Disability-Adjusted Life Years)	Global	Female	15-39 years	Tobacco	Rate	2018	0.0175663	0.0246054	0.0110338
DALYs (Disability-Adjusted Life Years)	Global	Both	15-39 years	Tobacco	Rate	2018	0.10544130840999999	0.14448102370000002	0.0678163
DALYs (Disability-Adjusted Life Years)	Global	Male	15-39 years	Tobacco	Number	2019	2829.828062469936	3946.602071588261	1790.7399191080665
DALYs (Disability-Adjusted Life Years)	Global	Female	15-39 years	Tobacco	Number	2019	240.99033027625305	338.91031307182675	149.90947730885887
DALYs (Disability-Adjusted Life Years)	Global	Both	15-39 years	Tobacco	Number	2019	3070.818392746193	4271.237474264042	1949.8569333489568
DALYs (Disability-Adjusted Life Years)	Global	Male	15-39 years	Tobacco	Percent	2019	0.0217506635755521	0.030223300036252	0.0144050537300702
DALYs (Disability-Adjusted Life Years)	Global	Female	15-39 years	Tobacco	Percent	2019	0.0034633089587555	0.0048733464543905	0.0021725253158252
DALYs (Disability-Adjusted Life Years)	Global	Both	15-39 years	Tobacco	Percent	2019	0.0153700638519158	0.0214429682065197	0.0097684037257615
DALYs (Disability-Adjusted Life Years)	Global	Male	15-39 years	Tobacco	Rate	2019	0.190004	0.264988	0.12023633502000002
DALYs (Disability-Adjusted Life Years)	Global	Female	15-39 years	Tobacco	Rate	2019	0.016632592050000002	0.0233908	0.0103464
DALYs (Disability-Adjusted Life Years)	Global	Both	15-39 years	Tobacco	Rate	2019	0.10451166217999999	0.145367	0.0663611
DALYs (Disability-Adjusted Life Years)	Global	Male	15-39 years	Tobacco	Number	2020	2771.84090741854	3889.2208455495065	1771.0554867949118
DALYs (Disability-Adjusted Life Years)	Global	Female	15-39 years	Tobacco	Number	2020	228.5708109101585	324.3778569002759	142.2337166576651
DALYs (Disability-Adjusted Life Years)	Global	Both	15-39 years	Tobacco	Number	2020	3000.4117183286985	4186.817990485597	1921.6345593608453
DALYs (Disability-Adjusted Life Years)	Global	Male	15-39 years	Tobacco	Percent	2020	0.0217724891789696	0.0296716112613629	0.0142664174005207
DALYs (Disability-Adjusted Life Years)	Global	Female	15-39 years	Tobacco	Percent	2020	0.0033358613301854	0.0047573370861197	0.0020856989600263
DALYs (Disability-Adjusted Life Years)	East Asia	Male	20-24 years	High body-mass index	Number	1990	173.92412894311542	301.0453361616128	67.01062242335625
DALYs (Disability-Adjusted Life Years)	East Asia	Female	20-24 years	High body-mass index	Number	1990	137.57470451736827	250.81033628814592	54.93855791686577
DALYs (Disability-Adjusted Life Years)	East Asia	Both	20-24 years	High body-mass index	Number	1990	311.4988334604841	530.6678306542894	118.4535755276708
DALYs (Disability-Adjusted Life Years)	East Asia	Male	20-24 years	High body-mass index	Percent	1990	0.0460916324227174	0.0771912035329085	0.0177886887310634
DALYs (Disability-Adjusted Life Years)	East Asia	Female	20-24 years	High body-mass index	Percent	1990	0.0445011455377851	0.0759253972034886	0.0177815675546644
DALYs (Disability-Adjusted Life Years)	East Asia	Both	20-24 years	High body-mass index	Percent	1990	0.0453778401997955	0.0764214306204058	0.0178026474159355
DALYs (Disability-Adjusted Life Years)	East Asia	Male	20-24 years	High body-mass index	Rate	1990	0.250815	0.434136	0.0966356
DALYs (Disability-Adjusted Life Years)	East Asia	Female	20-24 years	High body-mass index	Rate	1990	0.206937	0.377263	0.0826373
DALYs (Disability-Adjusted Life Years)	East Asia	Both	20-24 years	High body-mass index	Rate	1990	0.229338	0.39069933951999997	0.08721036220999999
DALYs (Disability-Adjusted Life Years)	East Asia	Male	20-24 years	High body-mass index	Number	1991	176.3809354712301	296.9605906853406	62.00028827671153
DALYs (Disability-Adjusted Life Years)	East Asia	Female	20-24 years	High body-mass index	Number	1991	136.65353047124768	240.0522060227969	54.15636782990528
DALYs (Disability-Adjusted Life Years)	East Asia	Both	20-24 years	High body-mass index	Number	1991	313.0344659424781	531.5614650029593	116.72199370446374
DALYs (Disability-Adjusted Life Years)	East Asia	Male	20-24 years	High body-mass index	Percent	1991	0.0467199297002483	0.0781002073083563	0.0177788061328427
DALYs (Disability-Adjusted Life Years)	East Asia	Female	20-24 years	High body-mass index	Percent	1991	0.0449104371462914	0.0773388241763395	0.0179098679179358
DALYs (Disability-Adjusted Life Years)	East Asia	Both	20-24 years	High body-mass index	Percent	1991	0.0459100874352025	0.0778019258272171	0.0178562773554682
DALYs (Disability-Adjusted Life Years)	East Asia	Male	20-24 years	High body-mass index	Rate	1991	0.254246	0.42805681633000003	0.0893709
DALYs (Disability-Adjusted Life Years)	East Asia	Female	20-24 years	High body-mass index	Rate	1991	0.20795906507999998	0.365311	0.0824151
DALYs (Disability-Adjusted Life Years)	East Asia	Both	20-24 years	High body-mass index	Rate	1991	0.23173	0.393499	0.0864058
DALYs (Disability-Adjusted Life Years)	East Asia	Male	20-24 years	High body-mass index	Number	1992	167.41918484095905	288.0470265350553	66.92069315445997
DALYs (Disability-Adjusted Life Years)	East Asia	Female	20-24 years	High body-mass index	Number	1992	129.86816207660883	233.4567699084933	48.08102755777114
DALYs (Disability-Adjusted Life Years)	East Asia	Both	20-24 years	High body-mass index	Number	1992	297.2873469175681	522.7181246283862	113.18617457983564
DALYs (Disability-Adjusted Life Years)	East Asia	Male	20-24 years	High body-mass index	Percent	1992	0.0474236735858723	0.0782913701218348	0.0179738826879428
DALYs (Disability-Adjusted Life Years)	East Asia	Female	20-24 years	High body-mass index	Percent	1992	0.045279165110872	0.0780997450367098	0.0181541832392311
DALYs (Disability-Adjusted Life Years)	East Asia	Both	20-24 years	High body-mass index	Percent	1992	0.0464573696061204	0.0785082555561647	0.0180469101247039
DALYs (Disability-Adjusted Life Years)	East Asia	Male	20-24 years	High body-mass index	Rate	1992	0.24377425499000002	0.41941698236999997	0.0974413
DALYs (Disability-Adjusted Life Years)	East Asia	Female	20-24 years	High body-mass index	Rate	1992	0.201149	0.361595	0.0744714
DALYs (Disability-Adjusted Life Years)	East Asia	Both	20-24 years	High body-mass index	Rate	1992	0.22312	0.39231009008999995	0.0849484
DALYs (Disability-Adjusted Life Years)	East Asia	Male	20-24 years	High body-mass index	Number	1993	159.3518612270466	271.87775435551964	61.06431571772268
DALYs (Disability-Adjusted Life Years)	East Asia	Female	20-24 years	High body-mass index	Number	1993	123.40684705159354	225.49515854364617	47.33623025401343
DALYs (Disability-Adjusted Life Years)	East Asia	Both	20-24 years	High body-mass index	Number	1993	282.75870827864054	506.9750072203459	110.2920408693519
DALYs (Disability-Adjusted Life Years)	East Asia	Male	20-24 years	High body-mass index	Percent	1993	0.0481221188686581	0.0798893000546063	0.0182922596386481
DALYs (Disability-Adjusted Life Years)	East Asia	Female	20-24 years	High body-mass index	Percent	1993	0.045793931323547	0.0789273645928873	0.0180878132396908
DALYs (Disability-Adjusted Life Years)	East Asia	Both	20-24 years	High body-mass index	Percent	1993	0.047070778627873	0.079097693049869	0.0182167914328452
DALYs (Disability-Adjusted Life Years)	East Asia	Male	20-24 years	High body-mass index	Rate	1993	0.236321	0.40319770965999996	0.0905591
DALYs (Disability-Adjusted Life Years)	East Asia	Female	20-24 years	High body-mass index	Rate	1993	0.19493241563000002	0.35619	0.0747719
DALYs (Disability-Adjusted Life Years)	East Asia	Both	20-24 years	High body-mass index	Rate	1993	0.216279	0.38777971994000004	0.0843612
DALYs (Disability-Adjusted Life Years)	East Asia	Male	20-24 years	High body-mass index	Number	1994	147.85883336868184	248.6383618568485	57.85314978193675
DALYs (Disability-Adjusted Life Years)	East Asia	Female	20-24 years	High body-mass index	Number	1994	115.48324428236783	207.53086277099104	41.665864233413785
DALYs (Disability-Adjusted Life Years)	East Asia	Both	20-24 years	High body-mass index	Number	1994	263.3420776510498	446.66011122976187	100.27954736987616
DALYs (Disability-Adjusted Life Years)	East Asia	Male	20-24 years	High body-mass index	Percent	1994	0.0488727755739324	0.0806303847258788	0.0186748384349975
DALYs (Disability-Adjusted Life Years)	East Asia	Female	20-24 years	High body-mass index	Percent	1994	0.0463639617404413	0.0795829743273599	0.0181698288860163
DALYs (Disability-Adjusted Life Years)	East Asia	Both	20-24 years	High body-mass index	Percent	1994	0.0477375116208277	0.080141614108765	0.0184276299422878
DALYs (Disability-Adjusted Life Years)	East Asia	Male	20-24 years	High body-mass index	Rate	1994	0.22558329639999997	0.37933926571000004	0.0882646
DALYs (Disability-Adjusted Life Years)	East Asia	Female	20-24 years	High body-mass index	Rate	1994	0.186782	0.335659	0.0673902
DALYs (Disability-Adjusted Life Years)	East Asia	Both	20-24 years	High body-mass index	Rate	1994	0.206749	0.350671	0.0787291
DALYs (Disability-Adjusted Life Years)	East Asia	Male	20-24 years	High body-mass index	Number	1995	136.44195054158473	237.4430631645405	52.677231739181565
DALYs (Disability-Adjusted Life Years)	East Asia	Female	20-24 years	High body-mass index	Number	1995	108.88118993917902	192.47080564901967	41.85918516168341
DALYs (Disability-Adjusted Life Years)	East Asia	Both	20-24 years	High body-mass index	Number	1995	245.32314048076373	417.5033465391133	97.38046438764312
DALYs (Disability-Adjusted Life Years)	East Asia	Male	20-24 years	High body-mass index	Percent	1995	0.0498054340811151	0.0823035726504254	0.0190017006936378
DALYs (Disability-Adjusted Life Years)	East Asia	Female	20-24 years	High body-mass index	Percent	1995	0.0468973648362286	0.0808564257834544	0.0183756759945242
DALYs (Disability-Adjusted Life Years)	East Asia	Both	20-24 years	High body-mass index	Percent	1995	0.0484689362939484	0.0818007412372677	0.0186787188260606
DALYs (Disability-Adjusted Life Years)	East Asia	Male	20-24 years	High body-mass index	Rate	1995	0.21648089114000002	0.37673080534000003	0.0835785
DALYs (Disability-Adjusted Life Years)	East Asia	Female	20-24 years	High body-mass index	Rate	1995	0.181643	0.321093	0.0698323
DALYs (Disability-Adjusted Life Years)	East Asia	Both	20-24 years	High body-mass index	Rate	1995	0.19949882504000002	0.339517	0.07919060626999999
DALYs (Disability-Adjusted Life Years)	East Asia	Male	20-24 years	High body-mass index	Number	1996	132.0301044244105	219.0389039878558	51.7131977873216
DALYs (Disability-Adjusted Life Years)	East Asia	Female	20-24 years	High body-mass index	Number	1996	103.61987566344206	187.8856603168735	39.771327468686906
DALYs (Disability-Adjusted Life Years)	East Asia	Both	20-24 years	High body-mass index	Number	1996	235.6499800878525	402.8885439083159	94.14390075007644
DALYs (Disability-Adjusted Life Years)	East Asia	Male	20-24 years	High body-mass index	Percent	1996	0.0507047399111257	0.082916938076252	0.0190974187066138
DALYs (Disability-Adjusted Life Years)	East Asia	Female	20-24 years	High body-mass index	Percent	1996	0.0474705202151475	0.0813752804371047	0.0185243627502799
DALYs (Disability-Adjusted Life Years)	East Asia	Both	20-24 years	High body-mass index	Percent	1996	0.0492258805245682	0.0821705346481061	0.0188452927645634
DALYs (Disability-Adjusted Life Years)	East Asia	Male	20-24 years	High body-mass index	Rate	1996	0.219978	0.364945	0.08616044303999999
DALYs (Disability-Adjusted Life Years)	East Asia	Female	20-24 years	High body-mass index	Rate	1996	0.179984	0.32635	0.0690813
DALYs (Disability-Adjusted Life Years)	East Asia	Both	20-24 years	High body-mass index	Rate	1996	0.20039722916000002	0.342617	0.08006016738999999
DALYs (Disability-Adjusted Life Years)	East Asia	Male	20-24 years	High body-mass index	Number	1997	130.571454491424	213.2819676577533	49.58879543353784
DALYs (Disability-Adjusted Life Years)	East Asia	Female	20-24 years	High body-mass index	Number	1997	100.78716208145508	175.0229373980389	40.6221501059504
DALYs (Disability-Adjusted Life Years)	East Asia	Both	20-24 years	High body-mass index	Number	1997	231.35861657287904	390.5999165117273	90.80098700862747
DALYs (Disability-Adjusted Life Years)	East Asia	Male	20-24 years	High body-mass index	Percent	1997	0.0518247427409891	0.0850324233506478	0.0194978028912276
DALYs (Disability-Adjusted Life Years)	East Asia	Female	20-24 years	High body-mass index	Percent	1997	0.048109513962047	0.0809516123671651	0.0187545386591243
DALYs (Disability-Adjusted Life Years)	East Asia	Both	20-24 years	High body-mass index	Percent	1997	0.0501343160286375	0.0838048602228611	0.0190896558487864
DALYs (Disability-Adjusted Life Years)	East Asia	Male	20-24 years	High body-mass index	Rate	1997	0.22984	0.375432	0.0872893
DALYs (Disability-Adjusted Life Years)	East Asia	Female	20-24 years	High body-mass index	Rate	1997	0.183653	0.318924	0.0740211
DALYs (Disability-Adjusted Life Years)	East Asia	Both	20-24 years	High body-mass index	Rate	1997	0.20714569871000002	0.349722	0.08129817758999999
DALYs (Disability-Adjusted Life Years)	East Asia	Male	20-24 years	High body-mass index	Number	1998	128.20979548406498	212.1457988850047	48.48530865458496
DALYs (Disability-Adjusted Life Years)	East Asia	Female	20-24 years	High body-mass index	Number	1998	100.95511067597944	174.85562756823293	39.20890574480328
DALYs (Disability-Adjusted Life Years)	East Asia	Both	20-24 years	High body-mass index	Number	1998	229.16490616004432	380.0179423109036	90.83044213222868
DALYs (Disability-Adjusted Life Years)	East Asia	Male	20-24 years	High body-mass index	Percent	1998	0.0527854704316617	0.0865791986746549	0.0197942472577031
DALYs (Disability-Adjusted Life Years)	East Asia	Female	20-24 years	High body-mass index	Percent	1998	0.0487851287269613	0.0824583367825297	0.018969891147645
DALYs (Disability-Adjusted Life Years)	East Asia	Both	20-24 years	High body-mass index	Percent	1998	0.0509373953753717	0.0847103894235268	0.019400542307394
DALYs (Disability-Adjusted Life Years)	East Asia	Male	20-24 years	High body-mass index	Rate	1998	0.238115	0.394003	0.09004835593999999
DALYs (Disability-Adjusted Life Years)	East Asia	Female	20-24 years	High body-mass index	Rate	1998	0.19319280323000002	0.334613	0.07503214410999999
DALYs (Disability-Adjusted Life Years)	East Asia	Both	20-24 years	High body-mass index	Rate	1998	0.21599	0.35817033872000004	0.0856085
DALYs (Disability-Adjusted Life Years)	East Asia	Male	20-24 years	High body-mass index	Number	1999	131.85938807553683	220.71091033875769	49.32661213410994
DALYs (Disability-Adjusted Life Years)	East Asia	Female	20-24 years	High body-mass index	Number	1999	102.06952328711148	175.16871239159877	40.9789214777289
DALYs (Disability-Adjusted Life Years)	East Asia	Both	20-24 years	High body-mass index	Number	1999	233.9289113626481	395.0412740053529	90.91843223951304
DALYs (Disability-Adjusted Life Years)	East Asia	Male	20-24 years	High body-mass index	Percent	1999	0.0540833138438643	0.0883960673100148	0.0202003759531462
DALYs (Disability-Adjusted Life Years)	East Asia	Female	20-24 years	High body-mass index	Percent	1999	0.049537552624739	0.0833623759397417	0.0192231601621895
DALYs (Disability-Adjusted Life Years)	East Asia	Both	20-24 years	High body-mass index	Percent	1999	0.0519943125521156	0.0863532636012568	0.0196021842220071
DALYs (Disability-Adjusted Life Years)	East Asia	Male	20-24 years	High body-mass index	Rate	1999	0.25571	0.42801648414000004	0.0956573
DALYs (Disability-Adjusted Life Years)	East Asia	Female	20-24 years	High body-mass index	Rate	1999	0.20352	0.34927431248999996	0.08170913875000001
DALYs (Disability-Adjusted Life Years)	East Asia	Both	20-24 years	High body-mass index	Rate	1999	0.22997750138999998	0.38836843472000004	0.0893827
DALYs (Disability-Adjusted Life Years)	East Asia	Male	20-24 years	High body-mass index	Number	2000	141.42451112414605	234.45523719429045	52.48823050845808
DALYs (Disability-Adjusted Life Years)	East Asia	Female	20-24 years	High body-mass index	Number	2000	107.11676435997904	185.71822418850485	42.15376496543836
DALYs (Disability-Adjusted Life Years)	East Asia	Both	20-24 years	High body-mass index	Number	2000	248.54127548412487	412.90492918430334	97.66720756744871
DALYs (Disability-Adjusted Life Years)	East Asia	Male	20-24 years	High body-mass index	Percent	2000	0.055595133426683	0.0910143485602562	0.0207366320602909
DALYs (Disability-Adjusted Life Years)	East Asia	Female	20-24 years	High body-mass index	Percent	2000	0.0504332756100387	0.0847924267346721	0.0194439526256458
DALYs (Disability-Adjusted Life Years)	East Asia	Both	20-24 years	High body-mass index	Percent	2000	0.053245140509274	0.0879288657729311	0.0200768701891785
DALYs (Disability-Adjusted Life Years)	East Asia	Male	20-24 years	High body-mass index	Rate	2000	0.282456	0.46825916358999997	0.104831
DALYs (Disability-Adjusted Life Years)	East Asia	Female	20-24 years	High body-mass index	Rate	2000	0.21986860076999998	0.381206	0.0865251
DALYs (Disability-Adjusted Life Years)	East Asia	Both	20-24 years	High body-mass index	Rate	2000	0.25159	0.41797038583999996	0.0988654
DALYs (Disability-Adjusted Life Years)	East Asia	Male	20-24 years	High body-mass index	Number	2001	149.02922421600277	249.6811808569124	53.93881380609173
DALYs (Disability-Adjusted Life Years)	East Asia	Female	20-24 years	High body-mass index	Number	2001	113.73759142183114	198.67429633007688	45.607628041743325
DALYs (Disability-Adjusted Life Years)	East Asia	Both	20-24 years	High body-mass index	Number	2001	262.7668156378338	443.8244688746185	101.39274733620464
DALYs (Disability-Adjusted Life Years)	East Asia	Male	20-24 years	High body-mass index	Percent	2001	0.057110936049691	0.0929296275614985	0.0212726027542753
DALYs (Disability-Adjusted Life Years)	East Asia	Female	20-24 years	High body-mass index	Percent	2001	0.0514179820416264	0.0857451632491649	0.0198030300981134
DALYs (Disability-Adjusted Life Years)	East Asia	Both	20-24 years	High body-mass index	Percent	2001	0.0544911243458093	0.0891920715565383	0.0205638672994155
DALYs (Disability-Adjusted Life Years)	East Asia	Male	20-24 years	High body-mass index	Rate	2001	0.303101	0.507811	0.109703
DALYs (Disability-Adjusted Life Years)	East Asia	Female	20-24 years	High body-mass index	Rate	2001	0.237831	0.415437	0.0953677
DALYs (Disability-Adjusted Life Years)	East Asia	Both	20-24 years	High body-mass index	Rate	2001	0.270919	0.457593	0.10453820884000001
DALYs (Disability-Adjusted Life Years)	East Asia	Male	20-24 years	High body-mass index	Number	2002	159.466727220809	265.97368334187905	57.274487487045576
DALYs (Disability-Adjusted Life Years)	East Asia	Female	20-24 years	High body-mass index	Number	2002	120.024461110402	203.8653478035376	45.29070740045152
DALYs (Disability-Adjusted Life Years)	East Asia	Both	20-24 years	High body-mass index	Number	2002	279.4911883312108	465.3857040873597	106.18219194670574
DALYs (Disability-Adjusted Life Years)	East Asia	Male	20-24 years	High body-mass index	Percent	2002	0.0587335061376825	0.0960562177634645	0.0220777976010568
DALYs (Disability-Adjusted Life Years)	East Asia	Female	20-24 years	High body-mass index	Percent	2002	0.0525334866443994	0.0869009175130734	0.0204980905665499
DALYs (Disability-Adjusted Life Years)	East Asia	Both	20-24 years	High body-mass index	Percent	2002	0.0558896514297839	0.0910857082641991	0.0211763392868262
DALYs (Disability-Adjusted Life Years)	East Asia	Male	20-24 years	High body-mass index	Rate	2002	0.326604	0.544741	0.11730389707000001
DALYs (Disability-Adjusted Life Years)	East Asia	Female	20-24 years	High body-mass index	Rate	2002	0.252745	0.429296	0.0953724
DALYs (Disability-Adjusted Life Years)	East Asia	Both	20-24 years	High body-mass index	Rate	2002	0.290187	0.483196	0.11024583909999999
DALYs (Disability-Adjusted Life Years)	East Asia	Male	20-24 years	High body-mass index	Number	2003	176.60215630101123	290.8785150148809	65.53937115590227
DALYs (Disability-Adjusted Life Years)	East Asia	Female	20-24 years	High body-mass index	Number	2003	129.69216377276717	221.82136749626108	51.188386810813256
DALYs (Disability-Adjusted Life Years)	East Asia	Both	20-24 years	High body-mass index	Number	2003	306.29432007377847	507.78112455245946	116.70777042083094
DALYs (Disability-Adjusted Life Years)	East Asia	Male	20-24 years	High body-mass index	Percent	2003	0.0605405336022521	0.0985736559452338	0.0227962833937008
DALYs (Disability-Adjusted Life Years)	East Asia	Female	20-24 years	High body-mass index	Percent	2003	0.0540003115981428	0.088934100251968	0.0210770540372202
DALYs (Disability-Adjusted Life Years)	East Asia	Both	20-24 years	High body-mass index	Percent	2003	0.0575847782705276	0.093185178007398	0.0219841105889999
DALYs (Disability-Adjusted Life Years)	East Asia	Male	20-24 years	High body-mass index	Rate	2003	0.358711	0.590828	0.13312248234000001
DALYs (Disability-Adjusted Life Years)	East Asia	Female	20-24 years	High body-mass index	Rate	2003	0.270509	0.462671	0.10676775460999999
DALYs (Disability-Adjusted Life Years)	East Asia	Both	20-24 years	High body-mass index	Rate	2003	0.315195	0.522537	0.12009930262999999
DALYs (Disability-Adjusted Life Years)	East Asia	Male	20-24 years	High body-mass index	Number	2004	189.7831287445428	324.3599104491197	67.63678405773614
DALYs (Disability-Adjusted Life Years)	East Asia	Female	20-24 years	High body-mass index	Number	2004	135.9501703869804	230.5754651218296	54.075371995951286
DALYs (Disability-Adjusted Life Years)	East Asia	Both	20-24 years	High body-mass index	Number	2004	325.7332991315229	544.5259667811038	120.48255982569026
DALYs (Disability-Adjusted Life Years)	East Asia	Male	20-24 years	High body-mass index	Percent	2004	0.0625393877720057	0.1011965942159436	0.0237150434622903
DALYs (Disability-Adjusted Life Years)	East Asia	Female	20-24 years	High body-mass index	Percent	2004	0.0553353468809351	0.0912803422779412	0.0216479554899363
DALYs (Disability-Adjusted Life Years)	East Asia	Both	20-24 years	High body-mass index	Percent	2004	0.0593108189108527	0.0962170851345785	0.0226724154192677
DALYs (Disability-Adjusted Life Years)	East Asia	Male	20-24 years	High body-mass index	Rate	2004	0.375202	0.64126	0.133718
DALYs (Disability-Adjusted Life Years)	East Asia	Female	20-24 years	High body-mass index	Rate	2004	0.27515	0.46666310585000004	0.109443
DALYs (Disability-Adjusted Life Years)	East Asia	Both	20-24 years	High body-mass index	Rate	2004	0.325762	0.544575	0.12049334004000001
DALYs (Disability-Adjusted Life Years)	East Asia	Male	20-24 years	High body-mass index	Number	2005	200.23927446286663	326.0644971120878	74.24218803966765
DALYs (Disability-Adjusted Life Years)	East Asia	Female	20-24 years	High body-mass index	Number	2005	141.3140050944017	239.6703818541747	53.71218618052529
DALYs (Disability-Adjusted Life Years)	East Asia	Both	20-24 years	High body-mass index	Number	2005	341.55327955726824	552.2585149697054	128.72837884813333
DALYs (Disability-Adjusted Life Years)	East Asia	Male	20-24 years	High body-mass index	Percent	2005	0.0646251835793881	0.1037237836993141	0.0242731328814543
DALYs (Disability-Adjusted Life Years)	East Asia	Female	20-24 years	High body-mass index	Percent	2005	0.0563677895270127	0.0928888742110364	0.0217449503105619
DALYs (Disability-Adjusted Life Years)	East Asia	Both	20-24 years	High body-mass index	Percent	2005	0.0609299519169735	0.0980995841004978	0.0231585160036034
DALYs (Disability-Adjusted Life Years)	East Asia	Male	20-24 years	High body-mass index	Rate	2005	0.378328	0.61606	0.14027171466000002
DALYs (Disability-Adjusted Life Years)	East Asia	Female	20-24 years	High body-mass index	Rate	2005	0.271943	0.461219	0.10336320431000001
DALYs (Disability-Adjusted Life Years)	East Asia	Both	20-24 years	High body-mass index	Rate	2005	0.325624	0.526502	0.12272477466000001
DALYs (Disability-Adjusted Life Years)	East Asia	Male	20-24 years	High body-mass index	Number	2006	217.4398044175576	352.95059635180866	80.70146458910828
DALYs (Disability-Adjusted Life Years)	East Asia	Female	20-24 years	High body-mass index	Number	2006	147.7758447818341	247.23464875743912	57.90465533945022
DALYs (Disability-Adjusted Life Years)	East Asia	Both	20-24 years	High body-mass index	Number	2006	365.21564919939175	585.727870107565	140.58279771916636
DALYs (Disability-Adjusted Life Years)	East Asia	Male	20-24 years	High body-mass index	Percent	2006	0.0665496517446339	0.1070275112392556	0.0251669941122148
DALYs (Disability-Adjusted Life Years)	East Asia	Female	20-24 years	High body-mass index	Percent	2006	0.0574636001316269	0.0940912000230243	0.0224168064955318
DALYs (Disability-Adjusted Life Years)	East Asia	Both	20-24 years	High body-mass index	Percent	2006	0.062544714961667	0.1007278978837209	0.0237459174184963
DALYs (Disability-Adjusted Life Years)	East Asia	Male	20-24 years	High body-mass index	Rate	2006	0.387001	0.628184	0.143633
DALYs (Disability-Adjusted Life Years)	East Asia	Female	20-24 years	High body-mass index	Rate	2006	0.266085	0.44517	0.104263
DALYs (Disability-Adjusted Life Years)	East Asia	Both	20-24 years	High body-mass index	Rate	2006	0.326894	0.5242681518900001	0.125832
DALYs (Disability-Adjusted Life Years)	East Asia	Male	20-24 years	High body-mass index	Number	2007	242.70936379310268	397.7294673750905	89.76351699371722
DALYs (Disability-Adjusted Life Years)	East Asia	Female	20-24 years	High body-mass index	Number	2007	158.48698095849718	265.1772160496554	63.74929983525308
DALYs (Disability-Adjusted Life Years)	East Asia	Both	20-24 years	High body-mass index	Number	2007	401.1963447515992	650.8372023306183	154.86478839857665
DALYs (Disability-Adjusted Life Years)	East Asia	Male	20-24 years	High body-mass index	Percent	2007	0.068651734115469	0.1103701035724402	0.0260764525023283
DALYs (Disability-Adjusted Life Years)	East Asia	Female	20-24 years	High body-mass index	Percent	2007	0.0589828653380318	0.0962125944371748	0.0227168690934342
DALYs (Disability-Adjusted Life Years)	East Asia	Both	20-24 years	High body-mass index	Percent	2007	0.0644803546526918	0.1038953680844002	0.0244224884428203
DALYs (Disability-Adjusted Life Years)	East Asia	Male	20-24 years	High body-mass index	Rate	2007	0.406052	0.6653997014499999	0.150174
DALYs (Disability-Adjusted Life Years)	East Asia	Female	20-24 years	High body-mass index	Rate	2007	0.26677945752000004	0.44637	0.107309
DALYs (Disability-Adjusted Life Years)	East Asia	Both	20-24 years	High body-mass index	Rate	2007	0.336629	0.5460936720699999	0.129941
DALYs (Disability-Adjusted Life Years)	East Asia	Male	20-24 years	High body-mass index	Number	2008	262.9991833659347	442.3267023353192	98.54635059396406
DALYs (Disability-Adjusted Life Years)	East Asia	Female	20-24 years	High body-mass index	Number	2008	170.2325225518783	282.7244034487454	65.04098727982228
DALYs (Disability-Adjusted Life Years)	East Asia	Both	20-24 years	High body-mass index	Number	2008	433.23170591781263	719.8395519558529	163.23035230986855
DALYs (Disability-Adjusted Life Years)	East Asia	Male	20-24 years	High body-mass index	Percent	2008	0.0710091995293206	0.1130195619525009	0.0269048981215961
DALYs (Disability-Adjusted Life Years)	East Asia	Female	20-24 years	High body-mass index	Percent	2008	0.0605167178621853	0.0988233543639085	0.0232746158430435
DALYs (Disability-Adjusted Life Years)	East Asia	Both	20-24 years	High body-mass index	Percent	2008	0.0664798480121701	0.1065796427505393	0.0251905622640746
DALYs (Disability-Adjusted Life Years)	East Asia	Male	20-24 years	High body-mass index	Rate	2008	0.41746432808999995	0.702115	0.156425
DALYs (Disability-Adjusted Life Years)	East Asia	Female	20-24 years	High body-mass index	Rate	2008	0.271175	0.45037018333000006	0.103608
DALYs (Disability-Adjusted Life Years)	East Asia	Both	20-24 years	High body-mass index	Rate	2008	0.344449	0.572322	0.129779
DALYs (Disability-Adjusted Life Years)	East Asia	Male	20-24 years	High body-mass index	Number	2009	285.2591519347156	474.1466849660658	106.87047808634318
DALYs (Disability-Adjusted Life Years)	East Asia	Female	20-24 years	High body-mass index	Number	2009	182.6561589025085	308.93070176244805	71.12820807145452
DALYs (Disability-Adjusted Life Years)	East Asia	Both	20-24 years	High body-mass index	Number	2009	467.9153108372244	770.8731237548504	178.22083889421003
DALYs (Disability-Adjusted Life Years)	East Asia	Male	20-24 years	High body-mass index	Percent	2009	0.0733317522857442	0.1177985808481049	0.0277475858824277
DALYs (Disability-Adjusted Life Years)	East Asia	Female	20-24 years	High body-mass index	Percent	2009	0.0620260242969501	0.1015546695017395	0.0237021980295253
DALYs (Disability-Adjusted Life Years)	East Asia	Both	20-24 years	High body-mass index	Percent	2009	0.0684572256264335	0.1104664870710863	0.0258155243311223
DALYs (Disability-Adjusted Life Years)	East Asia	Male	20-24 years	High body-mass index	Rate	2009	0.437167	0.7266423603800001	0.163782
DALYs (Disability-Adjusted Life Years)	East Asia	Female	20-24 years	High body-mass index	Rate	2009	0.281177	0.475562	0.109493
DALYs (Disability-Adjusted Life Years)	East Asia	Both	20-24 years	High body-mass index	Rate	2009	0.359346	0.59201	0.136869
DALYs (Disability-Adjusted Life Years)	East Asia	Male	20-24 years	High body-mass index	Number	2010	301.91984616875123	512.0473329148072	111.36837281325776
DALYs (Disability-Adjusted Life Years)	East Asia	Female	20-24 years	High body-mass index	Number	2010	187.79911726463223	316.93643703179146	71.35151749177388
DALYs (Disability-Adjusted Life Years)	East Asia	Both	20-24 years	High body-mass index	Number	2010	489.7189634333839	813.1413220982917	179.9026793250568
DALYs (Disability-Adjusted Life Years)	East Asia	Male	20-24 years	High body-mass index	Percent	2010	0.0753554547486292	0.1210336502752818	0.0286654260289098
DALYs (Disability-Adjusted Life Years)	East Asia	Female	20-24 years	High body-mass index	Percent	2010	0.0633078275410913	0.1035185612587209	0.0239765767555372
DALYs (Disability-Adjusted Life Years)	East Asia	Both	20-24 years	High body-mass index	Percent	2010	0.0702286539511229	0.1132601789568084	0.0264756048829217
DALYs (Disability-Adjusted Life Years)	East Asia	Male	20-24 years	High body-mass index	Rate	2010	0.45698	0.775026	0.16856517639000002
DALYs (Disability-Adjusted Life Years)	East Asia	Female	20-24 years	High body-mass index	Rate	2010	0.28670191158999997	0.483848	0.108928
DALYs (Disability-Adjusted Life Years)	East Asia	Both	20-24 years	High body-mass index	Rate	2010	0.372207	0.6180214415699999	0.136734
DALYs (Disability-Adjusted Life Years)	East Asia	Male	20-24 years	High body-mass index	Number	2011	299.0194762260889	492.9360322310037	108.8752043862003
DALYs (Disability-Adjusted Life Years)	East Asia	Female	20-24 years	High body-mass index	Number	2011	188.2941375943346	323.3761094314309	72.39243568726948
DALYs (Disability-Adjusted Life Years)	East Asia	Both	20-24 years	High body-mass index	Number	2011	487.31361382042286	788.7945839320455	187.694286730246
DALYs (Disability-Adjusted Life Years)	East Asia	Male	20-24 years	High body-mass index	Percent	2011	0.077452668941822	0.124052864206405	0.0294958157368022
DALYs (Disability-Adjusted Life Years)	East Asia	Female	20-24 years	High body-mass index	Percent	2011	0.0644912063025578	0.1050896135103125	0.0244669943963827
DALYs (Disability-Adjusted Life Years)	East Asia	Both	20-24 years	High body-mass index	Percent	2011	0.0718615591729512	0.1156997949443576	0.0271453724627746
DALYs (Disability-Adjusted Life Years)	East Asia	Male	20-24 years	High body-mass index	Rate	2011	0.459571	0.757606	0.16733314059999999
DALYs (Disability-Adjusted Life Years)	East Asia	Female	20-24 years	High body-mass index	Rate	2011	0.293674	0.5043546973999999	0.11290711938999999
DALYs (Disability-Adjusted Life Years)	East Asia	Both	20-24 years	High body-mass index	Rate	2011	0.37723102997999997	0.6106084149900001	0.14529474878999998
DALYs (Disability-Adjusted Life Years)	East Asia	Male	20-24 years	High body-mass index	Number	2012	296.0596758527924	483.3546588572603	112.97482793373612
DALYs (Disability-Adjusted Life Years)	East Asia	Female	20-24 years	High body-mass index	Number	2012	181.8998388980576	310.6105286300838	71.13916044391934
DALYs (Disability-Adjusted Life Years)	East Asia	Both	20-24 years	High body-mass index	Number	2012	477.95951475085	791.8763283369368	179.5509606737072
DALYs (Disability-Adjusted Life Years)	East Asia	Male	20-24 years	High body-mass index	Percent	2012	0.0805111935290498	0.1299321669416734	0.0305454135745766
DALYs (Disability-Adjusted Life Years)	East Asia	Female	20-24 years	High body-mass index	Percent	2012	0.0669801753194979	0.1086602344107179	0.0254509144716019
DALYs (Disability-Adjusted Life Years)	East Asia	Both	20-24 years	High body-mass index	Percent	2012	0.0747670419058398	0.1201140002758085	0.0282975093562473
DALYs (Disability-Adjusted Life Years)	East Asia	Male	20-24 years	High body-mass index	Rate	2012	0.472097	0.7707579632900001	0.18014980653999998
DALYs (Disability-Adjusted Life Years)	East Asia	Female	20-24 years	High body-mass index	Rate	2012	0.29693	0.507036	0.116126
DALYs (Disability-Adjusted Life Years)	East Asia	Both	20-24 years	High body-mass index	Rate	2012	0.385539	0.638756	0.144832
DALYs (Disability-Adjusted Life Years)	East Asia	Male	20-24 years	High body-mass index	Number	2013	306.3778801827115	512.7713467794716	108.70299373613126
DALYs (Disability-Adjusted Life Years)	East Asia	Female	20-24 years	High body-mass index	Number	2013	173.9672372577094	288.94591553658995	68.19082190207385
DALYs (Disability-Adjusted Life Years)	East Asia	Both	20-24 years	High body-mass index	Number	2013	480.3451174404204	788.3254673799632	179.87430116550803
DALYs (Disability-Adjusted Life Years)	East Asia	Male	20-24 years	High body-mass index	Percent	2013	0.0828005374066751	0.1332782570036796	0.0312564622426905
DALYs (Disability-Adjusted Life Years)	East Asia	Female	20-24 years	High body-mass index	Percent	2013	0.0686023581237604	0.1109392757384972	0.0262257120670321
DALYs (Disability-Adjusted Life Years)	East Asia	Both	20-24 years	High body-mass index	Percent	2013	0.0770494438398073	0.1229643494035039	0.0293428215719779
DALYs (Disability-Adjusted Life Years)	East Asia	Male	20-24 years	High body-mass index	Rate	2013	0.515106	0.8621103733200001	0.18275977996999998
DALYs (Disability-Adjusted Life Years)	East Asia	Female	20-24 years	High body-mass index	Rate	2013	0.302819	0.502958	0.118697
DALYs (Disability-Adjusted Life Years)	East Asia	Both	20-24 years	High body-mass index	Rate	2013	0.410804	0.674198	0.153833
DALYs (Disability-Adjusted Life Years)	East Asia	Male	20-24 years	High body-mass index	Number	2014	341.7373419826716	576.2588197350934	121.17859437374494
DALYs (Disability-Adjusted Life Years)	East Asia	Female	20-24 years	High body-mass index	Number	2014	167.0805824716222	286.9429818435717	64.46312260744213
DALYs (Disability-Adjusted Life Years)	East Asia	Both	20-24 years	High body-mass index	Number	2014	508.8179244542941	827.7286444153749	182.0020976205331
DALYs (Disability-Adjusted Life Years)	East Asia	Male	20-24 years	High body-mass index	Percent	2014	0.0852093986308114	0.137791667614585	0.0322561767781094
DALYs (Disability-Adjusted Life Years)	East Asia	Female	20-24 years	High body-mass index	Percent	2014	0.0701895251131035	0.1144847655994046	0.0266748707049744
DALYs (Disability-Adjusted Life Years)	East Asia	Both	20-24 years	High body-mass index	Percent	2014	0.0796403408056873	0.128465814387834	0.0303141736975273
DALYs (Disability-Adjusted Life Years)	East Asia	Male	20-24 years	High body-mass index	Rate	2014	0.612435	1.0327265268999999	0.21716691287999998
DALYs (Disability-Adjusted Life Years)	East Asia	Female	20-24 years	High body-mass index	Rate	2014	0.314124	0.539474	0.12119535730999999
DALYs (Disability-Adjusted Life Years)	East Asia	Both	20-24 years	High body-mass index	Rate	2014	0.466852	0.759459	0.166991
DALYs (Disability-Adjusted Life Years)	East Asia	Male	20-24 years	High body-mass index	Number	2015	351.44461941037963	606.9485775351561	117.61245460066752
DALYs (Disability-Adjusted Life Years)	East Asia	Female	20-24 years	High body-mass index	Number	2015	159.39285357389602	284.11269584684794	57.43893566230778
DALYs (Disability-Adjusted Life Years)	East Asia	Both	20-24 years	High body-mass index	Number	2015	510.83747298427534	866.1219708347699	180.0552121332041
DALYs (Disability-Adjusted Life Years)	East Asia	Male	20-24 years	High body-mass index	Percent	2015	0.0879078255896019	0.141385323996867	0.0331988485150504
DALYs (Disability-Adjusted Life Years)	East Asia	Female	20-24 years	High body-mass index	Percent	2015	0.0723512216664842	0.1181112238769612	0.0274508582332774
DALYs (Disability-Adjusted Life Years)	East Asia	Both	20-24 years	High body-mass index	Percent	2015	0.0824127992686942	0.1337842522805745	0.0311721178606699
DALYs (Disability-Adjusted Life Years)	East Asia	Male	20-24 years	High body-mass index	Rate	2015	0.673465	1.16308	0.225378
DALYs (Disability-Adjusted Life Years)	East Asia	Female	20-24 years	High body-mass index	Rate	2015	0.324982	0.579269	0.117111
DALYs (Disability-Adjusted Life Years)	East Asia	Both	20-24 years	High body-mass index	Rate	2015	0.504624	0.855588	0.177865
DALYs (Disability-Adjusted Life Years)	East Asia	Male	20-24 years	High body-mass index	Number	2016	345.85985274577416	610.0378803905825	119.94714782242444
DALYs (Disability-Adjusted Life Years)	East Asia	Female	20-24 years	High body-mass index	Number	2016	153.4984430073083	269.08346725316096	55.53607215906682
DALYs (Disability-Adjusted Life Years)	East Asia	Both	20-24 years	High body-mass index	Number	2016	499.3582957530821	814.6554243021702	173.17897411382455
DALYs (Disability-Adjusted Life Years)	East Asia	Male	20-24 years	High body-mass index	Percent	2016	0.0903556442363696	0.1456611136102248	0.0342424445325914
DALYs (Disability-Adjusted Life Years)	East Asia	Female	20-24 years	High body-mass index	Percent	2016	0.0743875527167635	0.1213425513899086	0.0282350192628148
DALYs (Disability-Adjusted Life Years)	East Asia	Both	20-24 years	High body-mass index	Percent	2016	0.0847778290979623	0.1357598909840974	0.0324484662991938
DALYs (Disability-Adjusted Life Years)	East Asia	Male	20-24 years	High body-mass index	Rate	2016	0.702703	1.23945	0.24370328143999997
DALYs (Disability-Adjusted Life Years)	East Asia	Female	20-24 years	High body-mass index	Rate	2016	0.33654	0.589956	0.121761
DALYs (Disability-Adjusted Life Years)	East Asia	Both	20-24 years	High body-mass index	Rate	2016	0.526586	0.8590755095900001	0.182622
DALYs (Disability-Adjusted Life Years)	East Asia	Male	20-24 years	High body-mass index	Number	2017	324.5782209976771	553.7449340675532	114.98385852276894
DALYs (Disability-Adjusted Life Years)	East Asia	Female	20-24 years	High body-mass index	Number	2017	147.7915774862258	262.5784796002039	54.02814835822713
DALYs (Disability-Adjusted Life Years)	East Asia	Both	20-24 years	High body-mass index	Number	2017	472.36979848390257	783.9814905443122	171.23512093876772
DALYs (Disability-Adjusted Life Years)	East Asia	Male	20-24 years	High body-mass index	Percent	2017	0.092783671069085	0.149220140869798	0.0347603351125962
DALYs (Disability-Adjusted Life Years)	East Asia	Female	20-24 years	High body-mass index	Percent	2017	0.0771580803013744	0.1250049350137423	0.0293482585752799
DALYs (Disability-Adjusted Life Years)	East Asia	Both	20-24 years	High body-mass index	Percent	2017	0.0872566180283695	0.1412262795535342	0.0328633923885104
DALYs (Disability-Adjusted Life Years)	East Asia	Male	20-24 years	High body-mass index	Rate	2017	0.693352	1.18289	0.245624
DALYs (Disability-Adjusted Life Years)	East Asia	Female	20-24 years	High body-mass index	Rate	2017	0.344963	0.612889	0.12610804622000002
DALYs (Disability-Adjusted Life Years)	East Asia	Both	20-24 years	High body-mass index	Rate	2017	0.526871	0.874436	0.19099196627999998
DALYs (Disability-Adjusted Life Years)	East Asia	Male	20-24 years	High body-mass index	Number	2018	329.99259963783885	544.032470406228	117.36218376550168
DALYs (Disability-Adjusted Life Years)	East Asia	Female	20-24 years	High body-mass index	Number	2018	145.07179235205547	261.2330536681904	53.59100218490063
DALYs (Disability-Adjusted Life Years)	East Asia	Both	20-24 years	High body-mass index	Number	2018	475.0643919898941	773.4496243506204	173.78204062753224
DALYs (Disability-Adjusted Life Years)	East Asia	Male	20-24 years	High body-mass index	Percent	2018	0.0954952471160022	0.1542166655693941	0.0353425741728124
DALYs (Disability-Adjusted Life Years)	East Asia	Female	20-24 years	High body-mass index	Percent	2018	0.0796113247199862	0.1292099899180159	0.0303743115307192
DALYs (Disability-Adjusted Life Years)	East Asia	Both	20-24 years	High body-mass index	Percent	2018	0.0900142799044607	0.1444807875828574	0.0334752862614467
DALYs (Disability-Adjusted Life Years)	East Asia	Male	20-24 years	High body-mass index	Rate	2018	0.736953	1.2149561795900001	0.262098
DALYs (Disability-Adjusted Life Years)	East Asia	Female	20-24 years	High body-mass index	Rate	2018	0.35768291465999996	0.644085	0.132132
DALYs (Disability-Adjusted Life Years)	East Asia	Both	20-24 years	High body-mass index	Rate	2018	0.556694	0.90635	0.203643
DALYs (Disability-Adjusted Life Years)	East Asia	Male	20-24 years	High body-mass index	Number	2019	321.85588616569976	547.6739581196733	118.4565938370724
DALYs (Disability-Adjusted Life Years)	East Asia	Female	20-24 years	High body-mass index	Number	2019	142.92275016168347	253.0458404874198	54.08923802293276
DALYs (Disability-Adjusted Life Years)	East Asia	Both	20-24 years	High body-mass index	Number	2019	464.77863632738274	776.7190900133689	174.13536884052073
DALYs (Disability-Adjusted Life Years)	East Asia	Male	20-24 years	High body-mass index	Percent	2019	0.0982350722993302	0.1577786640585362	0.0361719109314047
DALYs (Disability-Adjusted Life Years)	East Asia	Female	20-24 years	High body-mass index	Percent	2019	0.0822302612164641	0.133497397592481	0.031063221379446
DALYs (Disability-Adjusted Life Years)	East Asia	Both	20-24 years	High body-mass index	Percent	2019	0.0926967228610253	0.1491920711724356	0.0340217429057009
DALYs (Disability-Adjusted Life Years)	East Asia	Male	20-24 years	High body-mass index	Rate	2019	0.747741	1.27237	0.2752
DALYs (Disability-Adjusted Life Years)	East Asia	Female	20-24 years	High body-mass index	Rate	2019	0.369676	0.654513	0.13990402334000002
DALYs (Disability-Adjusted Life Years)	East Asia	Both	20-24 years	High body-mass index	Rate	2019	0.568847	0.950633	0.213126
DALYs (Disability-Adjusted Life Years)	East Asia	Male	20-24 years	High body-mass index	Number	2020	302.4617797045282	527.4387038829121	117.99946568415864
DALYs (Disability-Adjusted Life Years)	East Asia	Female	20-24 years	High body-mass index	Number	2020	140.48835506223443	251.735413348692	54.960430469007335
DALYs (Disability-Adjusted Life Years)	East Asia	Both	20-24 years	High body-mass index	Number	2020	442.9501347667626	769.9498299672764	176.8606343341546
DALYs (Disability-Adjusted Life Years)	East Asia	Male	20-24 years	High body-mass index	Percent	2020	0.100816728555986	0.1637355597611915	0.0371815884600853
DALYs (Disability-Adjusted Life Years)	East Asia	Female	20-24 years	High body-mass index	Percent	2020	0.0854454562490358	0.1375678396940313	0.0325039099336034
DALYs (Disability-Adjusted Life Years)	East Asia	Both	20-24 years	High body-mass index	Percent	2020	0.0953758512138449	0.1532637399017232	0.0353930053345248
DALYs (Disability-Adjusted Life Years)	East Asia	Male	20-24 years	High body-mass index	Rate	2020	0.726301	1.26654	0.28335191399000004
DALYs (Disability-Adjusted Life Years)	East Asia	Female	20-24 years	High body-mass index	Rate	2020	0.37833661684000003	0.677926	0.14800901693000001
DALYs (Disability-Adjusted Life Years)	East Asia	Both	20-24 years	High body-mass index	Rate	2020	0.562281	0.9773752102200001	0.224507
DALYs (Disability-Adjusted Life Years)	East Asia	Male	20-24 years	High body-mass index	Number	2021	304.4449793780315	524.4984545061282	111.98315049953972
DALYs (Disability-Adjusted Life Years)	East Asia	Female	20-24 years	High body-mass index	Number	2021	142.26095945200447	265.9957528231241	55.99668768742333
DALYs (Disability-Adjusted Life Years)	East Asia	Both	20-24 years	High body-mass index	Number	2021	446.7059388300358	766.6685863261807	168.96963506378677
DALYs (Disability-Adjusted Life Years)	East Asia	Male	20-24 years	High body-mass index	Percent	2021	0.1039273037610914	0.1668472885444672	0.0379156691051972
DALYs (Disability-Adjusted Life Years)	East Asia	Female	20-24 years	High body-mass index	Percent	2021	0.0886052426164359	0.1429945766342613	0.0337174394556224
DALYs (Disability-Adjusted Life Years)	East Asia	Both	20-24 years	High body-mass index	Percent	2021	0.098488350754441	0.1572978817870334	0.0361065599048077
DALYs (Disability-Adjusted Life Years)	East Asia	Male	20-24 years	High body-mass index	Rate	2021	0.749757	1.29168	0.275781
DALYs (Disability-Adjusted Life Years)	East Asia	Female	20-24 years	High body-mass index	Rate	2021	0.39575607290000003	0.739974	0.155777
DALYs (Disability-Adjusted Life Years)	East Asia	Both	20-24 years	High body-mass index	Rate	2021	0.583529	1.00149	0.220724
DALYs (Disability-Adjusted Life Years)	East Asia	Male	25-29 years	High body-mass index	Number	1990	240.2488727617148	395.1321943804872	91.25026002399612
DALYs (Disability-Adjusted Life Years)	East Asia	Female	25-29 years	High body-mass index	Number	1990	159.5150713803751	281.117983862371	62.09666669516778
DALYs (Disability-Adjusted Life Years)	East Asia	Both	25-29 years	High body-mass index	Number	1990	399.7639441420901	672.698093763599	152.5968781959771
DALYs (Disability-Adjusted Life Years)	East Asia	Male	25-29 years	High body-mass index	Percent	1990	0.059359092855232	0.0973383912543082	0.0227377416826105
DALYs (Disability-Adjusted Life Years)	East Asia	Female	25-29 years	High body-mass index	Percent	1990	0.0535263167907502	0.0894232411974242	0.020903814608723
DALYs (Disability-Adjusted Life Years)	East Asia	Both	25-29 years	High body-mass index	Percent	1990	0.0568939194500637	0.0939477227324997	0.0220193938290821
DALYs (Disability-Adjusted Life Years)	East Asia	Male	25-29 years	High body-mass index	Rate	1990	0.41205	0.6776891340800001	0.156503
DALYs (Disability-Adjusted Life Years)	East Asia	Female	25-29 years	High body-mass index	Rate	1990	0.28806374538999996	0.507663	0.112139
DALYs (Disability-Adjusted Life Years)	East Asia	Both	25-29 years	High body-mass index	Rate	1990	0.35165494794999996	0.591743	0.13423283427000002
DALYs (Disability-Adjusted Life Years)	East Asia	Male	25-29 years	High body-mass index	Number	1991	261.1942503970381	427.4963249797902	96.7711399812502
DALYs (Disability-Adjusted Life Years)	East Asia	Female	25-29 years	High body-mass index	Number	1991	169.90174216067803	297.03976549752576	65.81052243339141
DALYs (Disability-Adjusted Life Years)	East Asia	Both	25-29 years	High body-mass index	Number	1991	431.0959925577165	720.073024137057	164.26464390727162
DALYs (Disability-Adjusted Life Years)	East Asia	Male	25-29 years	High body-mass index	Percent	1991	0.0601470374486219	0.0995235842372175	0.0229849901955579
DALYs (Disability-Adjusted Life Years)	East Asia	Female	25-29 years	High body-mass index	Percent	1991	0.0538965756185173	0.0897201906298092	0.020955556158894
DALYs (Disability-Adjusted Life Years)	East Asia	Both	25-29 years	High body-mass index	Percent	1991	0.057510749982341	0.0949080876150304	0.0222480552317509
DALYs (Disability-Adjusted Life Years)	East Asia	Male	25-29 years	High body-mass index	Rate	1991	0.413788	0.677246	0.153306
DALYs (Disability-Adjusted Life Years)	East Asia	Female	25-29 years	High body-mass index	Rate	1991	0.28389	0.49632638472999996	0.10996338695999999
DALYs (Disability-Adjusted Life Years)	East Asia	Both	25-29 years	High body-mass index	Rate	1991	0.35056874059000004	0.5855658543800001	0.133581
DALYs (Disability-Adjusted Life Years)	East Asia	Male	25-29 years	High body-mass index	Number	1992	261.00935779158635	430.0984676532821	104.35695902788062
DALYs (Disability-Adjusted Life Years)	East Asia	Female	25-29 years	High body-mass index	Number	1992	171.60835641698938	294.8404204699434	66.156071244734
DALYs (Disability-Adjusted Life Years)	East Asia	Both	25-29 years	High body-mass index	Number	1992	432.6177142085757	732.3483440575587	172.30924871801508
DALYs (Disability-Adjusted Life Years)	East Asia	Male	25-29 years	High body-mass index	Percent	1992	0.0610840977321602	0.1005054042125782	0.0232311938043401
DALYs (Disability-Adjusted Life Years)	East Asia	Female	25-29 years	High body-mass index	Percent	1992	0.0542972153634466	0.0907343427208715	0.0213562311728288
DALYs (Disability-Adjusted Life Years)	East Asia	Both	25-29 years	High body-mass index	Percent	1992	0.0582009267084661	0.0955163154784106	0.0225280376299203
DALYs (Disability-Adjusted Life Years)	East Asia	Male	25-29 years	High body-mass index	Rate	1992	0.390305	0.643155	0.156052
DALYs (Disability-Adjusted Life Years)	East Asia	Female	25-29 years	High body-mass index	Rate	1992	0.271709	0.46682255675999995	0.10474529331999999
DALYs (Disability-Adjusted Life Years)	East Asia	Both	25-29 years	High body-mass index	Rate	1992	0.332701	0.563206	0.132513
DALYs (Disability-Adjusted Life Years)	East Asia	Male	25-29 years	High body-mass index	Number	1993	261.32274052194094	428.9260266723678	101.82573580546084
DALYs (Disability-Adjusted Life Years)	East Asia	Female	25-29 years	High body-mass index	Number	1993	167.8026832384653	307.7178117747349	64.75985169272609
DALYs (Disability-Adjusted Life Years)	East Asia	Both	25-29 years	High body-mass index	Number	1993	429.1254237604058	720.2120654113553	162.744702521542
DALYs (Disability-Adjusted Life Years)	East Asia	Male	25-29 years	High body-mass index	Percent	1993	0.0621600245360247	0.1020260469977557	0.0238417382145158
DALYs (Disability-Adjusted Life Years)	East Asia	Female	25-29 years	High body-mass index	Percent	1993	0.0550134103287632	0.0911777625135241	0.02168602644694
DALYs (Disability-Adjusted Life Years)	East Asia	Both	25-29 years	High body-mass index	Percent	1993	0.0591479505935189	0.0969938740365726	0.0229206681919822
DALYs (Disability-Adjusted Life Years)	East Asia	Male	25-29 years	High body-mass index	Rate	1993	0.37903	0.622126	0.14769081539999998
DALYs (Disability-Adjusted Life Years)	East Asia	Female	25-29 years	High body-mass index	Rate	1993	0.25915116428999996	0.475233	0.100014
DALYs (Disability-Adjusted Life Years)	East Asia	Both	25-29 years	High body-mass index	Rate	1993	0.320971	0.538693	0.121727
DALYs (Disability-Adjusted Life Years)	East Asia	Male	25-29 years	High body-mass index	Number	1994	251.01535889842188	421.9328680957826	99.130420054854
DALYs (Disability-Adjusted Life Years)	East Asia	Female	25-29 years	High body-mass index	Number	1994	162.15929981513435	285.6993785890492	59.71283547789099
DALYs (Disability-Adjusted Life Years)	East Asia	Both	25-29 years	High body-mass index	Number	1994	413.1746587135563	681.3895133096512	165.05741673269873
DALYs (Disability-Adjusted Life Years)	East Asia	Male	25-29 years	High body-mass index	Percent	1994	0.0633402738051768	0.1031854338288831	0.0242285248326278
DALYs (Disability-Adjusted Life Years)	East Asia	Female	25-29 years	High body-mass index	Percent	1994	0.0557804908620309	0.0923740243114364	0.0218808654317179
DALYs (Disability-Adjusted Life Years)	East Asia	Both	25-29 years	High body-mass index	Percent	1994	0.0601411929049569	0.0978884603612937	0.0232520236027734
DALYs (Disability-Adjusted Life Years)	East Asia	Male	25-29 years	High body-mass index	Rate	1994	0.359969	0.605073	0.142158
DALYs (Disability-Adjusted Life Years)	East Asia	Female	25-29 years	High body-mass index	Rate	1994	0.24902108787000002	0.43873629289000005	0.0916984
DALYs (Disability-Adjusted Life Years)	East Asia	Both	25-29 years	High body-mass index	Rate	1994	0.306393	0.50529	0.1224
DALYs (Disability-Adjusted Life Years)	East Asia	Male	25-29 years	High body-mass index	Number	1995	238.49600340085996	410.5910152429393	92.21444029745368
DALYs (Disability-Adjusted Life Years)	East Asia	Female	25-29 years	High body-mass index	Number	1995	159.34835447452366	275.5340328751478	60.24647672133515
DALYs (Disability-Adjusted Life Years)	East Asia	Both	25-29 years	High body-mass index	Number	1995	397.8443578753838	674.1482943520446	159.3558416755733
DALYs (Disability-Adjusted Life Years)	East Asia	Male	25-29 years	High body-mass index	Percent	1995	0.0646394281314759	0.1046096930399029	0.0247917360522968
DALYs (Disability-Adjusted Life Years)	East Asia	Female	25-29 years	High body-mass index	Percent	1995	0.0566642082246277	0.0941840035026143	0.0222644432118241
DALYs (Disability-Adjusted Life Years)	East Asia	Both	25-29 years	High body-mass index	Percent	1995	0.0611872175791717	0.09949000196649	0.0236202735262309
DALYs (Disability-Adjusted Life Years)	East Asia	Male	25-29 years	High body-mass index	Rate	1995	0.34259962374999997	0.589814	0.132466
DALYs (Disability-Adjusted Life Years)	East Asia	Female	25-29 years	High body-mass index	Rate	1995	0.246231	0.42576601911999995	0.0930952
DALYs (Disability-Adjusted Life Years)	East Asia	Both	25-29 years	High body-mass index	Rate	1995	0.296173	0.501865	0.11863143158999999
DALYs (Disability-Adjusted Life Years)	East Asia	Male	25-29 years	High body-mass index	Number	1996	240.5753321563223	411.9274157279816	93.67174924940336
DALYs (Disability-Adjusted Life Years)	East Asia	Female	25-29 years	High body-mass index	Number	1996	153.72707600103115	277.15416141115566	60.50784837355605
DALYs (Disability-Adjusted Life Years)	East Asia	Both	25-29 years	High body-mass index	Number	1996	394.30240815735306	668.6349433424884	157.8993418127077
DALYs (Disability-Adjusted Life Years)	East Asia	Male	25-29 years	High body-mass index	Percent	1996	0.0659914062947154	0.1062615741964262	0.0253888650981121
DALYs (Disability-Adjusted Life Years)	East Asia	Female	25-29 years	High body-mass index	Percent	1996	0.0576225344363042	0.0951362187816856	0.0224426177788839
DALYs (Disability-Adjusted Life Years)	East Asia	Both	25-29 years	High body-mass index	Percent	1996	0.0624480952221022	0.1015080208010681	0.0240669168940104
DALYs (Disability-Adjusted Life Years)	East Asia	Male	25-29 years	High body-mass index	Rate	1996	0.348919	0.5974405660300001	0.135857
DALYs (Disability-Adjusted Life Years)	East Asia	Female	25-29 years	High body-mass index	Rate	1996	0.240803	0.43414287831000004	0.0947814
DALYs (Disability-Adjusted Life Years)	East Asia	Both	25-29 years	High body-mass index	Rate	1996	0.29694112959999996	0.5035353861999999	0.118911
DALYs (Disability-Adjusted Life Years)	East Asia	Male	25-29 years	High body-mass index	Number	1997	247.98115065368967	417.41307279853953	93.32476899722988
DALYs (Disability-Adjusted Life Years)	East Asia	Female	25-29 years	High body-mass index	Number	1997	151.38046734630436	265.83954397015464	60.5705032464574
DALYs (Disability-Adjusted Life Years)	East Asia	Both	25-29 years	High body-mass index	Number	1997	399.36161799999394	670.1512171252955	153.84750328302815
DALYs (Disability-Adjusted Life Years)	East Asia	Male	25-29 years	High body-mass index	Percent	1997	0.0676665417778033	0.1089622066894509	0.0260169464013788
DALYs (Disability-Adjusted Life Years)	East Asia	Female	25-29 years	High body-mass index	Percent	1997	0.058719614807144	0.0971852578436471	0.0227741962556046
DALYs (Disability-Adjusted Life Years)	East Asia	Both	25-29 years	High body-mass index	Percent	1997	0.0639637611518406	0.1041140959776182	0.0246642634332675
DALYs (Disability-Adjusted Life Years)	East Asia	Male	25-29 years	High body-mass index	Rate	1997	0.365363	0.6149958145700001	0.1375
DALYs (Disability-Adjusted Life Years)	East Asia	Female	25-29 years	High body-mass index	Rate	1997	0.24070207254999998	0.42269739498000003	0.09631
DALYs (Disability-Adjusted Life Years)	East Asia	Both	25-29 years	High body-mass index	Rate	1997	0.305407	0.51249	0.11765304413000001
DALYs (Disability-Adjusted Life Years)	East Asia	Male	25-29 years	High body-mass index	Number	1998	245.4516340551863	421.7732523835418	96.73501370501856
DALYs (Disability-Adjusted Life Years)	East Asia	Female	25-29 years	High body-mass index	Number	1998	155.45272830642037	272.6519623276191	60.75016172150815
DALYs (Disability-Adjusted Life Years)	East Asia	Both	25-29 years	High body-mass index	Number	1998	400.90436236160673	672.7656246153172	164.03454677380316
DALYs (Disability-Adjusted Life Years)	East Asia	Male	25-29 years	High body-mass index	Percent	1998	0.0690179250129331	0.1108868655652375	0.0267543879956938
DALYs (Disability-Adjusted Life Years)	East Asia	Female	25-29 years	High body-mass index	Percent	1998	0.0596646370818057	0.0982576007898642	0.0231365458528747
DALYs (Disability-Adjusted Life Years)	East Asia	Both	25-29 years	High body-mass index	Percent	1998	0.0650544272406085	0.1055790319484561	0.0252504686312353
DALYs (Disability-Adjusted Life Years)	East Asia	Male	25-29 years	High body-mass index	Rate	1998	0.369082	0.634214	0.145459
DALYs (Disability-Adjusted Life Years)	East Asia	Female	25-29 years	High body-mass index	Rate	1998	0.25072158910000003	0.439746	0.09798076400000001
DALYs (Disability-Adjusted Life Years)	East Asia	Both	25-29 years	High body-mass index	Rate	1998	0.311975	0.5235306925500001	0.12764790103999998
DALYs (Disability-Adjusted Life Years)	East Asia	Male	25-29 years	High body-mass index	Number	1999	255.98026509188932	437.7009199365809	96.7818193770216
DALYs (Disability-Adjusted Life Years)	East Asia	Female	25-29 years	High body-mass index	Number	1999	160.16528792986736	271.5294718281764	62.36811564463145
DALYs (Disability-Adjusted Life Years)	East Asia	Both	25-29 years	High body-mass index	Number	1999	416.1455530217567	703.5779259976132	163.20806416896576
DALYs (Disability-Adjusted Life Years)	East Asia	Male	25-29 years	High body-mass index	Percent	1999	0.0705323943829757	0.1129232989460761	0.0272078675603293
DALYs (Disability-Adjusted Life Years)	East Asia	Female	25-29 years	High body-mass index	Percent	1999	0.0607304085115299	0.1003697321725549	0.0234648943911787
DALYs (Disability-Adjusted Life Years)	East Asia	Both	25-29 years	High body-mass index	Percent	1999	0.0664000164692443	0.1074759232865034	0.0256827437840425
DALYs (Disability-Adjusted Life Years)	East Asia	Male	25-29 years	High body-mass index	Rate	1999	0.395707	0.67662	0.14961
DALYs (Disability-Adjusted Life Years)	East Asia	Female	25-29 years	High body-mass index	Rate	1999	0.26281	0.445544	0.10233779756000001
DALYs (Disability-Adjusted Life Years)	East Asia	Both	25-29 years	High body-mass index	Rate	1999	0.33124	0.560028	0.129909
DALYs (Disability-Adjusted Life Years)	East Asia	Male	25-29 years	High body-mass index	Number	2000	278.36882860414755	457.3803650353997	104.1823518644294
DALYs (Disability-Adjusted Life Years)	East Asia	Female	25-29 years	High body-mass index	Number	2000	164.48165214439032	291.7453391707716	64.62880755265886
DALYs (Disability-Adjusted Life Years)	East Asia	Both	25-29 years	High body-mass index	Number	2000	442.850480748538	729.2813380977415	168.7307126029698
DALYs (Disability-Adjusted Life Years)	East Asia	Male	25-29 years	High body-mass index	Percent	2000	0.0719519263672295	0.1159521973354076	0.0277943734952269
DALYs (Disability-Adjusted Life Years)	East Asia	Female	25-29 years	High body-mass index	Percent	2000	0.0617366301949458	0.1016600658665251	0.0237310896073216
DALYs (Disability-Adjusted Life Years)	East Asia	Both	25-29 years	High body-mass index	Percent	2000	0.0677831235355226	0.1094814089024062	0.0259982871442785
DALYs (Disability-Adjusted Life Years)	East Asia	Male	25-29 years	High body-mass index	Rate	2000	0.446364	0.73341	0.16705643055000002
DALYs (Disability-Adjusted Life Years)	East Asia	Female	25-29 years	High body-mass index	Rate	2000	0.276715	0.49081719621000003	0.108728
DALYs (Disability-Adjusted Life Years)	East Asia	Both	25-29 years	High body-mass index	Rate	2000	0.363575	0.598732	0.138526
DALYs (Disability-Adjusted Life Years)	East Asia	Male	25-29 years	High body-mass index	Number	2001	292.2699408679052	480.45980831335	109.1027447283174
DALYs (Disability-Adjusted Life Years)	East Asia	Female	25-29 years	High body-mass index	Number	2001	169.2093792712686	294.2708602663363	65.45393237391195
DALYs (Disability-Adjusted Life Years)	East Asia	Both	25-29 years	High body-mass index	Number	2001	461.4793201391735	766.795044705288	173.0752527221676
DALYs (Disability-Adjusted Life Years)	East Asia	Male	25-29 years	High body-mass index	Percent	2001	0.0736579597336166	0.1177577509492045	0.0285703119150359
DALYs (Disability-Adjusted Life Years)	East Asia	Female	25-29 years	High body-mass index	Percent	2001	0.0629646059213815	0.1031847186604048	0.0242907952738432
DALYs (Disability-Adjusted Life Years)	East Asia	Both	25-29 years	High body-mass index	Percent	2001	0.0693280874646495	0.1121667160293587	0.02671249720366
DALYs (Disability-Adjusted Life Years)	East Asia	Male	25-29 years	High body-mass index	Rate	2001	0.49039927897999996	0.806163	0.183063
DALYs (Disability-Adjusted Life Years)	East Asia	Female	25-29 years	High body-mass index	Rate	2001	0.295084	0.513179	0.114145
DALYs (Disability-Adjusted Life Years)	East Asia	Both	25-29 years	High body-mass index	Rate	2001	0.394625	0.65571	0.148002
DALYs (Disability-Adjusted Life Years)	East Asia	Male	25-29 years	High body-mass index	Number	2002	306.0387800613324	502.9154277634116	111.71976238854992
DALYs (Disability-Adjusted Life Years)	East Asia	Female	25-29 years	High body-mass index	Number	2002	172.44135831015868	290.59200392957825	66.24072112407691
DALYs (Disability-Adjusted Life Years)	East Asia	Both	25-29 years	High body-mass index	Number	2002	478.4801383714913	791.2481323132548	178.21241870091632
DALYs (Disability-Adjusted Life Years)	East Asia	Male	25-29 years	High body-mass index	Percent	2002	0.075708317926966	0.1203725946417389	0.0294791647504826
DALYs (Disability-Adjusted Life Years)	East Asia	Female	25-29 years	High body-mass index	Percent	2002	0.0644702094141038	0.1062936062091101	0.0250099346435043
DALYs (Disability-Adjusted Life Years)	East Asia	Both	25-29 years	High body-mass index	Percent	2002	0.071216479996614	0.1157244406207843	0.0276661073149973
DALYs (Disability-Adjusted Life Years)	East Asia	Male	25-29 years	High body-mass index	Rate	2002	0.540345	0.887953	0.197254
DALYs (Disability-Adjusted Life Years)	East Asia	Female	25-29 years	High body-mass index	Rate	2002	0.314437	0.529877	0.120786
DALYs (Disability-Adjusted Life Years)	East Asia	Both	25-29 years	High body-mass index	Rate	2002	0.42921102255000004	0.709773	0.159862
DALYs (Disability-Adjusted Life Years)	East Asia	Male	25-29 years	High body-mass index	Number	2003	345.3228477843522	561.6862991185327	129.1469635419518
DALYs (Disability-Adjusted Life Years)	East Asia	Female	25-29 years	High body-mass index	Number	2003	176.33407308520685	293.2925978865575	67.28259873476689
DALYs (Disability-Adjusted Life Years)	East Asia	Both	25-29 years	High body-mass index	Number	2003	521.6569208695589	845.0458313873767	197.57206969214715
DALYs (Disability-Adjusted Life Years)	East Asia	Male	25-29 years	High body-mass index	Percent	2003	0.0779747969244231	0.123867897056685	0.030279148686507
DALYs (Disability-Adjusted Life Years)	East Asia	Female	25-29 years	High body-mass index	Percent	2003	0.0660023249566701	0.1085631529542183	0.0258388711185385
DALYs (Disability-Adjusted Life Years)	East Asia	Both	25-29 years	High body-mass index	Percent	2003	0.0734568186045963	0.1186782271888989	0.0286295360586002
DALYs (Disability-Adjusted Life Years)	East Asia	Male	25-29 years	High body-mass index	Rate	2003	0.640717	1.0421615826200001	0.239621
DALYs (Disability-Adjusted Life Years)	East Asia	Female	25-29 years	High body-mass index	Rate	2003	0.33678388774999996	0.560165	0.128504
DALYs (Disability-Adjusted Life Years)	East Asia	Both	25-29 years	High body-mass index	Rate	2003	0.49095	0.7953035341300001	0.18594229973999998
DALYs (Disability-Adjusted Life Years)	East Asia	Male	25-29 years	High body-mass index	Number	2004	350.2447316766139	566.6196158796233	131.62176264531217
DALYs (Disability-Adjusted Life Years)	East Asia	Female	25-29 years	High body-mass index	Number	2004	175.2357549653549	296.4368156288456	67.81461548995705
DALYs (Disability-Adjusted Life Years)	East Asia	Both	25-29 years	High body-mass index	Number	2004	525.4804866419689	845.7750934512663	196.22769503837276
DALYs (Disability-Adjusted Life Years)	East Asia	Male	25-29 years	High body-mass index	Percent	2004	0.080499358617653	0.1280188005923277	0.0316460759894253
DALYs (Disability-Adjusted Life Years)	East Asia	Female	25-29 years	High body-mass index	Percent	2004	0.0678887598471189	0.1114850392427355	0.0262331365812198
DALYs (Disability-Adjusted Life Years)	East Asia	Both	25-29 years	High body-mass index	Percent	2004	0.0757932068186783	0.1224809698751057	0.0294537861967704
DALYs (Disability-Adjusted Life Years)	East Asia	Male	25-29 years	High body-mass index	Rate	2004	0.676165	1.0938871942600001	0.25410232298999996
DALYs (Disability-Adjusted Life Years)	East Asia	Female	25-29 years	High body-mass index	Rate	2004	0.347896	0.5885168442100001	0.134633
DALYs (Disability-Adjusted Life Years)	East Asia	Both	25-29 years	High body-mass index	Rate	2004	0.514325	0.8278207021999999	0.192062
DALYs (Disability-Adjusted Life Years)	East Asia	Male	25-29 years	High body-mass index	Number	2005	344.71865447391025	575.0015166447984	127.60037678068812
DALYs (Disability-Adjusted Life Years)	East Asia	Female	25-29 years	High body-mass index	Number	2005	172.02285021062312	280.43957820812346	64.30003108284704
DALYs (Disability-Adjusted Life Years)	East Asia	Both	25-29 years	High body-mass index	Number	2005	516.7415046845333	842.1962292178611	195.25143198436444
DALYs (Disability-Adjusted Life Years)	East Asia	Male	25-29 years	High body-mass index	Percent	2005	0.0833747541663421	0.1330108868940812	0.0326902395877176
DALYs (Disability-Adjusted Life Years)	East Asia	Female	25-29 years	High body-mass index	Percent	2005	0.069782350830033	0.1145669360322758	0.026891541490903
DALYs (Disability-Adjusted Life Years)	East Asia	Both	25-29 years	High body-mass index	Percent	2005	0.078291994623843	0.1260918136864514	0.0305443897493129
DALYs (Disability-Adjusted Life Years)	East Asia	Male	25-29 years	High body-mass index	Rate	2005	0.6836244436800001	1.14031	0.253049
DALYs (Disability-Adjusted Life Years)	East Asia	Female	25-29 years	High body-mass index	Rate	2005	0.35075574799000003	0.571818	0.131108
DALYs (Disability-Adjusted Life Years)	East Asia	Both	25-29 years	High body-mass index	Rate	2005	0.519502	0.8466952490799999	0.196294
DALYs (Disability-Adjusted Life Years)	East Asia	Male	25-29 years	High body-mass index	Number	2006	335.68347396446177	543.8632603409675	124.62082763650086
DALYs (Disability-Adjusted Life Years)	East Asia	Female	25-29 years	High body-mass index	Number	2006	165.9376257813772	278.5790933094265	61.57350477380586
DALYs (Disability-Adjusted Life Years)	East Asia	Both	25-29 years	High body-mass index	Number	2006	501.6210997458392	797.9269298453985	186.4761426821574
DALYs (Disability-Adjusted Life Years)	East Asia	Male	25-29 years	High body-mass index	Percent	2006	0.0864419217751528	0.1374162517258263	0.0337585965594912
DALYs (Disability-Adjusted Life Years)	East Asia	Female	25-29 years	High body-mass index	Percent	2006	0.0720894869322984	0.1177466700720038	0.0280545230346498
DALYs (Disability-Adjusted Life Years)	East Asia	Both	25-29 years	High body-mass index	Percent	2006	0.0810917471905384	0.1307880724306388	0.0318040268523226
DALYs (Disability-Adjusted Life Years)	East Asia	Male	25-29 years	High body-mass index	Rate	2006	0.677185	1.09715	0.251401
DALYs (Disability-Adjusted Life Years)	East Asia	Female	25-29 years	High body-mass index	Rate	2006	0.343991	0.577498	0.12764264294000002
DALYs (Disability-Adjusted Life Years)	East Asia	Both	25-29 years	High body-mass index	Rate	2006	0.512856	0.815798	0.190653
DALYs (Disability-Adjusted Life Years)	East Asia	Male	25-29 years	High body-mass index	Number	2007	351.0526216703498	584.3290264728271	127.20821225727784
DALYs (Disability-Adjusted Life Years)	East Asia	Female	25-29 years	High body-mass index	Number	2007	169.6124595519649	292.0815181033825	61.62041499043292
DALYs (Disability-Adjusted Life Years)	East Asia	Both	25-29 years	High body-mass index	Number	2007	520.6650812223148	842.2559204304409	194.1056409512368
DALYs (Disability-Adjusted Life Years)	East Asia	Male	25-29 years	High body-mass index	Percent	2007	0.0896851100929376	0.1438107473596687	0.0351021843902977
DALYs (Disability-Adjusted Life Years)	East Asia	Female	25-29 years	High body-mass index	Percent	2007	0.0747786179970557	0.1212736567847588	0.0291295321096738
DALYs (Disability-Adjusted Life Years)	East Asia	Both	25-29 years	High body-mass index	Percent	2007	0.084212898953165	0.1359528453731608	0.03294976895017
DALYs (Disability-Adjusted Life Years)	East Asia	Male	25-29 years	High body-mass index	Rate	2007	0.713287	1.18727	0.258468
DALYs (Disability-Adjusted Life Years)	East Asia	Female	25-29 years	High body-mass index	Rate	2007	0.353589	0.608899	0.12845930024000002
DALYs (Disability-Adjusted Life Years)	East Asia	Both	25-29 years	High body-mass index	Rate	2007	0.535746	0.866652	0.199728
DALYs (Disability-Adjusted Life Years)	East Asia	Male	25-29 years	High body-mass index	Number	2008	379.7481636139152	613.2078724132361	139.1418000652126
DALYs (Disability-Adjusted Life Years)	East Asia	Female	25-29 years	High body-mass index	Number	2008	191.07757466058104	320.5889172573212	68.41004727342792
DALYs (Disability-Adjusted Life Years)	East Asia	Both	25-29 years	High body-mass index	Number	2008	570.8257382744955	911.3065926184232	211.18454861627447
DALYs (Disability-Adjusted Life Years)	East Asia	Male	25-29 years	High body-mass index	Percent	2008	0.0930938771444181	0.1490090014903946	0.0366192877135676
DALYs (Disability-Adjusted Life Years)	East Asia	Female	25-29 years	High body-mass index	Percent	2008	0.0772046246978276	0.1258213303623556	0.0301078474385757
DALYs (Disability-Adjusted Life Years)	East Asia	Both	25-29 years	High body-mass index	Percent	2008	0.0870921104677203	0.1403849201717847	0.034272622255788
DALYs (Disability-Adjusted Life Years)	East Asia	Male	25-29 years	High body-mass index	Rate	2008	0.766317	1.23743	0.28078259099999997
DALYs (Disability-Adjusted Life Years)	East Asia	Female	25-29 years	High body-mass index	Rate	2008	0.394401	0.661724	0.141204
DALYs (Disability-Adjusted Life Years)	East Asia	Both	25-29 years	High body-mass index	Rate	2008	0.58246	0.929881	0.215489
DALYs (Disability-Adjusted Life Years)	East Asia	Male	25-29 years	High body-mass index	Number	2009	439.17301736962	708.940700232748	167.37914664946146
DALYs (Disability-Adjusted Life Years)	East Asia	Female	25-29 years	High body-mass index	Number	2009	226.97501431617056	376.7633668150498	83.81010261593758
DALYs (Disability-Adjusted Life Years)	East Asia	Both	25-29 years	High body-mass index	Number	2009	666.1480316857901	1077.7227462189712	252.74208283780695
DALYs (Disability-Adjusted Life Years)	East Asia	Male	25-29 years	High body-mass index	Percent	2009	0.0965670827187498	0.1560867958244401	0.0378177246521573
DALYs (Disability-Adjusted Life Years)	East Asia	Female	25-29 years	High body-mass index	Percent	2009	0.0797621970076234	0.1306826785172567	0.0309912464910819
DALYs (Disability-Adjusted Life Years)	East Asia	Both	25-29 years	High body-mass index	Percent	2009	0.0900941420892329	0.1470216858341278	0.0353345269521273
DALYs (Disability-Adjusted Life Years)	East Asia	Male	25-29 years	High body-mass index	Rate	2009	0.8646670278799999	1.3958	0.329545
DALYs (Disability-Adjusted Life Years)	East Asia	Female	25-29 years	High body-mass index	Rate	2009	0.45489065872999995	0.755088	0.16796753115000002
DALYs (Disability-Adjusted Life Years)	East Asia	Both	25-29 years	High body-mass index	Rate	2009	0.6615988269899999	1.07036	0.251016
DALYs (Disability-Adjusted Life Years)	East Asia	Male	25-29 years	High body-mass index	Number	2010	499.065214939279	825.5005801209529	188.5546641485868
DALYs (Disability-Adjusted Life Years)	East Asia	Female	25-29 years	High body-mass index	Number	2010	248.74105322968347	409.3381998295389	97.18831877759176
DALYs (Disability-Adjusted Life Years)	East Asia	Both	25-29 years	High body-mass index	Number	2010	747.8062681689626	1206.1522528452456	289.1137520001567
DALYs (Disability-Adjusted Life Years)	East Asia	Male	25-29 years	High body-mass index	Percent	2010	0.0998300052131328	0.1606755449586113	0.0390149186009984
DALYs (Disability-Adjusted Life Years)	East Asia	Female	25-29 years	High body-mass index	Percent	2010	0.0822262476010832	0.134845657734494	0.0319865981408476
DALYs (Disability-Adjusted Life Years)	East Asia	Both	25-29 years	High body-mass index	Percent	2010	0.0931993286744377	0.1508586620315903	0.0364507636508556
DALYs (Disability-Adjusted Life Years)	East Asia	Male	25-29 years	High body-mass index	Rate	2010	0.941646	1.55757	0.35576852317999996
DALYs (Disability-Adjusted Life Years)	East Asia	Female	25-29 years	High body-mass index	Rate	2010	0.474676	0.781146	0.185466
DALYs (Disability-Adjusted Life Years)	East Asia	Both	25-29 years	High body-mass index	Rate	2010	0.7094834086499999	1.14434	0.27429752729999995
DALYs (Disability-Adjusted Life Years)	East Asia	Male	25-29 years	High body-mass index	Number	2011	565.1171265875457	926.8246005890544	211.8868160667849
DALYs (Disability-Adjusted Life Years)	East Asia	Female	25-29 years	High body-mass index	Number	2011	269.68618454963723	457.8929036991582	106.89742139898073
DALYs (Disability-Adjusted Life Years)	East Asia	Both	25-29 years	High body-mass index	Number	2011	834.8033111371834	1328.4187932226992	324.80848394866166
DALYs (Disability-Adjusted Life Years)	East Asia	Male	25-29 years	High body-mass index	Percent	2011	0.1034583043275313	0.1671008699992709	0.0399187688615834
DALYs (Disability-Adjusted Life Years)	East Asia	Female	25-29 years	High body-mass index	Percent	2011	0.0851822181335666	0.1394638334415823	0.0332307251950316
DALYs (Disability-Adjusted Life Years)	East Asia	Both	25-29 years	High body-mass index	Percent	2011	0.0967512862438522	0.1574587002569941	0.0374412776821581
DALYs (Disability-Adjusted Life Years)	East Asia	Male	25-29 years	High body-mass index	Rate	2011	1.00703	1.65159	0.37758
DALYs (Disability-Adjusted Life Years)	East Asia	Female	25-29 years	High body-mass index	Rate	2011	0.482515	0.8192487503800001	0.191258
DALYs (Disability-Adjusted Life Years)	East Asia	Both	25-29 years	High body-mass index	Rate	2011	0.745301	1.18599	0.289984
DALYs (Disability-Adjusted Life Years)	East Asia	Male	25-29 years	High body-mass index	Number	2012	652.769707892509	1055.3540817329176	256.1412659332081
DALYs (Disability-Adjusted Life Years)	East Asia	Female	25-29 years	High body-mass index	Number	2012	285.3366997544182	500.8918672084548	111.35122922111567
DALYs (Disability-Adjusted Life Years)	East Asia	Both	25-29 years	High body-mass index	Number	2012	938.106407646928	1521.8490804931837	364.6532213163404
DALYs (Disability-Adjusted Life Years)	East Asia	Male	25-29 years	High body-mass index	Percent	2012	0.1085275501000665	0.1747954392878268	0.0421043176929942
DALYs (Disability-Adjusted Life Years)	East Asia	Female	25-29 years	High body-mass index	Percent	2012	0.0892805649545868	0.1461451753615177	0.0349998056617808
DALYs (Disability-Adjusted Life Years)	East Asia	Both	25-29 years	High body-mass index	Percent	2012	0.1018495983201455	0.1644834452285182	0.0396864410068641
DALYs (Disability-Adjusted Life Years)	East Asia	Male	25-29 years	High body-mass index	Rate	2012	1.0961624323699999	1.7722	0.430125
DALYs (Disability-Adjusted Life Years)	East Asia	Female	25-29 years	High body-mass index	Rate	2012	0.478881	0.840647	0.186881
DALYs (Disability-Adjusted Life Years)	East Asia	Both	25-29 years	High body-mass index	Rate	2012	0.787435	1.27742	0.306085
DALYs (Disability-Adjusted Life Years)	East Asia	Male	25-29 years	High body-mass index	Number	2013	712.8839066438459	1155.046879316083	268.8451189534551
DALYs (Disability-Adjusted Life Years)	East Asia	Female	25-29 years	High body-mass index	Number	2013	300.91050655823705	514.9378237088581	118.57558028221688
DALYs (Disability-Adjusted Life Years)	East Asia	Both	25-29 years	High body-mass index	Number	2013	1013.7944132020835	1624.5891606808573	386.9849153998874
DALYs (Disability-Adjusted Life Years)	East Asia	Male	25-29 years	High body-mass index	Percent	2013	0.1122285565621674	0.1823251101261016	0.0433376289255298
DALYs (Disability-Adjusted Life Years)	East Asia	Female	25-29 years	High body-mass index	Percent	2013	0.0922935857985854	0.150746376090825	0.0360814997527342
DALYs (Disability-Adjusted Life Years)	East Asia	Both	25-29 years	High body-mass index	Percent	2013	0.105482675280935	0.1718170483157614	0.0413243070348186
DALYs (Disability-Adjusted Life Years)	East Asia	Male	25-29 years	High body-mass index	Rate	2013	1.13892	1.84533	0.42951416146000004
DALYs (Disability-Adjusted Life Years)	East Asia	Female	25-29 years	High body-mass index	Rate	2013	0.48046135979000004	0.8221970372999999	0.189329
DALYs (Disability-Adjusted Life Years)	East Asia	Both	25-29 years	High body-mass index	Rate	2013	0.809596	1.29736	0.309038
DALYs (Disability-Adjusted Life Years)	East Asia	Male	25-29 years	High body-mass index	Number	2014	761.2706487585995	1214.3247661703358	290.3355564151147
DALYs (Disability-Adjusted Life Years)	East Asia	Female	25-29 years	High body-mass index	Number	2014	299.72332352826004	506.9164867811311	112.87128560658816
DALYs (Disability-Adjusted Life Years)	East Asia	Both	25-29 years	High body-mass index	Number	2014	1060.9939722868592	1679.271950866056	407.9381757422169
DALYs (Disability-Adjusted Life Years)	East Asia	Male	25-29 years	High body-mass index	Percent	2014	0.1150431212689621	0.1866559645291381	0.0441969836362051
DALYs (Disability-Adjusted Life Years)	East Asia	Female	25-29 years	High body-mass index	Percent	2014	0.0948683850955884	0.1551285575431519	0.0375559181585274
DALYs (Disability-Adjusted Life Years)	East Asia	Both	25-29 years	High body-mass index	Percent	2014	0.1085232673101581	0.1773021797899184	0.0422665120568234
DALYs (Disability-Adjusted Life Years)	East Asia	Male	25-29 years	High body-mass index	Rate	2014	1.1780721730300001	1.87918	0.44929650237999996
DALYs (Disability-Adjusted Life Years)	East Asia	Female	25-29 years	High body-mass index	Rate	2014	0.46596576600999995	0.788079	0.17547568349999998
DALYs (Disability-Adjusted Life Years)	East Asia	Both	25-29 years	High body-mass index	Rate	2014	0.8228390809799999	1.30234	0.31637076400999997
DALYs (Disability-Adjusted Life Years)	East Asia	Male	25-29 years	High body-mass index	Number	2015	799.2953525963006	1273.322212894068	288.1528716968576
DALYs (Disability-Adjusted Life Years)	East Asia	Female	25-29 years	High body-mass index	Number	2015	293.38799546794974	497.1033900267948	105.28119835596472
DALYs (Disability-Adjusted Life Years)	East Asia	Both	25-29 years	High body-mass index	Number	2015	1092.6833480642472	1740.8528461828114	397.6276607327017
DALYs (Disability-Adjusted Life Years)	East Asia	Male	25-29 years	High body-mass index	Percent	2015	0.1182666478977462	0.1914296515156803	0.0458241710294309
DALYs (Disability-Adjusted Life Years)	East Asia	Female	25-29 years	High body-mass index	Percent	2015	0.0977431786187982	0.1586751492449451	0.0378831739060203
DALYs (Disability-Adjusted Life Years)	East Asia	Both	25-29 years	High body-mass index	Percent	2015	0.1119715687142564	0.180292035669594	0.0437292860227681
DALYs (Disability-Adjusted Life Years)	East Asia	Male	25-29 years	High body-mass index	Rate	2015	1.22635	1.9536403550600001	0.44210889660999997
DALYs (Disability-Adjusted Life Years)	East Asia	Female	25-29 years	High body-mass index	Rate	2015	0.456763	0.773919	0.163908
DALYs (Disability-Adjusted Life Years)	East Asia	Both	25-29 years	High body-mass index	Rate	2015	0.8443652846199999	1.34523	0.307265
DALYs (Disability-Adjusted Life Years)	East Asia	Male	25-29 years	High body-mass index	Number	2016	811.870687584223	1320.4185520265269	316.3356733530992
DALYs (Disability-Adjusted Life Years)	East Asia	Female	25-29 years	High body-mass index	Number	2016	293.1046354782956	495.8573849607456	109.90284976423888
DALYs (Disability-Adjusted Life Years)	East Asia	Both	25-29 years	High body-mass index	Number	2016	1104.9753230625183	1793.826194176278	442.0618698978282
DALYs (Disability-Adjusted Life Years)	East Asia	Male	25-29 years	High body-mass index	Percent	2016	0.120744967394242	0.195756592047585	0.0465404963594154
DALYs (Disability-Adjusted Life Years)	East Asia	Female	25-29 years	High body-mass index	Percent	2016	0.1005188074007736	0.16588319105251	0.0385887202054155
DALYs (Disability-Adjusted Life Years)	East Asia	Both	25-29 years	High body-mass index	Percent	2016	0.1146189709382407	0.1846733753392884	0.0449153195149241
DALYs (Disability-Adjusted Life Years)	East Asia	Male	25-29 years	High body-mass index	Rate	2016	1.27051	2.06635	0.49504
DALYs (Disability-Adjusted Life Years)	East Asia	Female	25-29 years	High body-mass index	Rate	2016	0.471595	0.797816	0.17683
DALYs (Disability-Adjusted Life Years)	East Asia	Both	25-29 years	High body-mass index	Rate	2016	0.8765969217299999	1.42307	0.350696
DALYs (Disability-Adjusted Life Years)	East Asia	Male	25-29 years	High body-mass index	Number	2017	809.1214789569352	1323.2118637464157	285.15946101160125
DALYs (Disability-Adjusted Life Years)	East Asia	Female	25-29 years	High body-mass index	Number	2017	293.0984078649046	503.5197240770652	108.81811964820037
DALYs (Disability-Adjusted Life Years)	East Asia	Both	25-29 years	High body-mass index	Number	2017	1102.2198868218406	1800.114172392356	406.9623515133849
DALYs (Disability-Adjusted Life Years)	East Asia	Male	25-29 years	High body-mass index	Percent	2017	0.1232537245874893	0.1988965030465531	0.0472688145286181
DALYs (Disability-Adjusted Life Years)	East Asia	Female	25-29 years	High body-mass index	Percent	2017	0.1033190008140643	0.1666553648773671	0.0396039165440045
DALYs (Disability-Adjusted Life Years)	East Asia	Both	25-29 years	High body-mass index	Percent	2017	0.1172340039557358	0.1905306969042715	0.0453012010775687
DALYs (Disability-Adjusted Life Years)	East Asia	Male	25-29 years	High body-mass index	Rate	2017	1.31986	2.1584626355200003	0.46516061307000006
DALYs (Disability-Adjusted Life Years)	East Asia	Female	25-29 years	High body-mass index	Rate	2017	0.499374	0.857884	0.185402
DALYs (Disability-Adjusted Life Years)	East Asia	Both	25-29 years	High body-mass index	Rate	2017	0.918542	1.50014	0.33914475050000004
DALYs (Disability-Adjusted Life Years)	East Asia	Male	25-29 years	High body-mass index	Number	2018	786.3175182264631	1292.8421905054172	286.29173232529627
DALYs (Disability-Adjusted Life Years)	East Asia	Female	25-29 years	High body-mass index	Number	2018	282.1169054560597	501.2461791123167	102.67871373770744
DALYs (Disability-Adjusted Life Years)	East Asia	Both	25-29 years	High body-mass index	Number	2018	1068.4344236825234	1749.0588514290298	391.82352753727287
DALYs (Disability-Adjusted Life Years)	East Asia	Male	25-29 years	High body-mass index	Percent	2018	0.1258537337325114	0.2032811537536106	0.0478844883567197
DALYs (Disability-Adjusted Life Years)	East Asia	Female	25-29 years	High body-mass index	Percent	2018	0.1058869704634964	0.1715497770981345	0.0400689002964398
DALYs (Disability-Adjusted Life Years)	East Asia	Both	25-29 years	High body-mass index	Percent	2018	0.119887479750678	0.1947526191368333	0.0457785288704817
DALYs (Disability-Adjusted Life Years)	East Asia	Male	25-29 years	High body-mass index	Rate	2018	1.35845	2.23353	0.4946
DALYs (Disability-Adjusted Life Years)	East Asia	Female	25-29 years	High body-mass index	Rate	2018	0.517937	0.920236	0.188507
DALYs (Disability-Adjusted Life Years)	East Asia	Both	25-29 years	High body-mass index	Rate	2018	0.950964	1.55676	0.348744
DALYs (Disability-Adjusted Life Years)	East Asia	Male	25-29 years	High body-mass index	Number	2019	756.427639642965	1301.078816288012	289.4936571677134
DALYs (Disability-Adjusted Life Years)	East Asia	Female	25-29 years	High body-mass index	Number	2019	269.2421431111554	481.71177005450994	100.94028048255733
DALYs (Disability-Adjusted Life Years)	East Asia	Both	25-29 years	High body-mass index	Number	2019	1025.6697827541204	1725.7849271868067	384.3090230839911
DALYs (Disability-Adjusted Life Years)	East Asia	Male	25-29 years	High body-mass index	Percent	2019	0.1282570182464724	0.2080867471204595	0.0489673662716648
DALYs (Disability-Adjusted Life Years)	East Asia	Female	25-29 years	High body-mass index	Percent	2019	0.1086978044300006	0.17671920520945	0.0403983235316876
DALYs (Disability-Adjusted Life Years)	East Asia	Both	25-29 years	High body-mass index	Percent	2019	0.1224788457434446	0.2006285161435782	0.0469854203991944
DALYs (Disability-Adjusted Life Years)	East Asia	Male	25-29 years	High body-mass index	Rate	2019	1.39829	2.4050975279799998	0.535141
DALYs (Disability-Adjusted Life Years)	East Asia	Female	25-29 years	High body-mass index	Rate	2019	0.538225	0.962959	0.201783
DALYs (Disability-Adjusted Life Years)	East Asia	Both	25-29 years	High body-mass index	Rate	2019	0.9850766108300001	1.6574831350900001	0.369099
DALYs (Disability-Adjusted Life Years)	East Asia	Male	25-29 years	High body-mass index	Number	2020	721.5257188442708	1212.8621568068058	268.9960311372521
DALYs (Disability-Adjusted Life Years)	East Asia	Female	25-29 years	High body-mass index	Number	2020	258.6270993132942	455.5582779177251	89.89150381938362
DALYs (Disability-Adjusted Life Years)	East Asia	Both	25-29 years	High body-mass index	Number	2020	980.1528181575654	1631.855169645724	367.2339227929924
DALYs (Disability-Adjusted Life Years)	East Asia	Male	25-29 years	High body-mass index	Percent	2020	0.1308509192819578	0.2125950796957117	0.0498916154356619
DALYs (Disability-Adjusted Life Years)	East Asia	Female	25-29 years	High body-mass index	Percent	2020	0.1121057237025595	0.1816443165326894	0.0419147039687223
DALYs (Disability-Adjusted Life Years)	East Asia	Both	25-29 years	High body-mass index	Percent	2020	0.1253128761991271	0.2051779763209987	0.0481358287264682
DALYs (Disability-Adjusted Life Years)	East Asia	Male	25-29 years	High body-mass index	Rate	2020	1.4297	2.40328	0.533015
DALYs (Disability-Adjusted Life Years)	East Asia	Female	25-29 years	High body-mass index	Rate	2020	0.563305	0.9922319591300001	0.195789
DALYs (Disability-Adjusted Life Years)	East Asia	Both	25-29 years	High body-mass index	Rate	2020	1.01697	1.69316	0.38103
DALYs (Disability-Adjusted Life Years)	East Asia	Male	25-29 years	High body-mass index	Number	2021	696.6868380032288	1192.407603752451	249.1506691421717
DALYs (Disability-Adjusted Life Years)	East Asia	Female	25-29 years	High body-mass index	Number	2021	247.91164324850564	448.6825722253827	92.66914940128116
DALYs (Disability-Adjusted Life Years)	East Asia	Both	25-29 years	High body-mass index	Number	2021	944.5984812517348	1599.546277360197	336.89488186511505
DALYs (Disability-Adjusted Life Years)	East Asia	Male	25-29 years	High body-mass index	Percent	2021	0.1340225062660959	0.2178220570102661	0.0496821011387477
[truncated: 106,994 more rows]
