# Supplementary material for: Global, regional, and national burden of early-onset kidney cancer in adolescents and young adults aged 15-39 years from 1990 to 2021: a systematic analysis for the Global Burden of Disease Study 2021
Source: Research Square preprint supplement (doi:10.21203/rs.3.rs-7464519/v1), 2025-10-17
Supplement: Supplementary file 4 [file 9d3e8bb1f92ea39b63b09147.xlsx]

## Sheet: sdi_quintile_breaks
Table S2. Classification of countries and territories according to socio-demographic index (SDI) quintiles.
Location name	Lower bound	Upper bound
Low SDI	0	0.46581580319161997
Low-middle SDI	0.46581580319161997	0.6188294452454329
Middle SDI	0.6188294452454329	0.7119746219361235
High-middle SDI	0.7119746219361235	0.8102959891918925
High SDI	0.8102959891918925	1
