# Supplementary material for: Global, regional, and national burden of early-onset kidney cancer in adolescents and young adults aged 15-39 years from 1990 to 2021: a systematic analysis for the Global Burden of Disease Study 2021
Source: Research Square preprint supplement (doi:10.21203/rs.3.rs-7464519/v1), 2025-10-17
Supplement: Supplementary file 5 [file c66f338c0536a326906e9787.xlsx]

## Sheet: Sheet1
Table 1. Global and regional incidence, mortality, and disability-adjusted life years (DALYs) of early-onset kidney in 2021.
	Incidence (95% UI)			Mortality (95% UI)			Disability-adjusted life years (DALYs) (95% UI)
Regions	Cases	Rate per 100,000(95% UI)		Cases	Rate per 100,000(95% UI)		Number	Rate per 100,000(95% UI)
Global	17622.48(16450.09,18855.04)	0.58(0.54,0.62)		3261.27(3029.83,3508.16)	0.11(0.10,0.11)		197665.03(183211.88,212705.46)	6.50(6.02,6.99)
High SDI	4897.55(4594.41,5225.61)	1.24(1.16,1.32)		576.76(543.81,612.02)	0.15(0.14,0.16)		35575.04(33412.30,37725.92)	9.14(8.59,9.68)
High-middle SDI	5717.80(5092.05,6469.57)	1.14(1.01,1.29)		845.29(755.09,957.62)	0.17(0.15,0.19)		51339.81(45834.60,58097.25)	10.36(9.25,11.71)
Middle SDI	5044.39(4534.14,5609.56)	0.51(0.46,0.57)		1156.64(1059.92,1268.93)	0.12(0.11,0.13)		69696.91(63747.75,76537.57)	7.17(6.56,7.88)
Low-middle SDI	1481.04(1236.17,1736.21)	0.19(0.16,0.22)		483.07(404.73,561.82)	0.06(0.05,0.07)		29011.02(24321.65,33735.40)	3.74(3.13,4.34)
Low SDI	468.13(320.63,617.09)	0.12(0.08,0.16)		196.36(134.67,255.50)	0.05(0.03,0.06)		11851.96(8113.95,15462.20)	2.96(2.03,3.85)
East Asia	5419.10(4425.13,6622.12)	0.97(0.79,1.19)		907.23(736.40,1105.86)	0.16(0.13,0.20)		54692.75(44346.94,66589.30)	10.02(8.13,12.20)
Southeast Asia	1080.95(910.54,1279.54)	0.38(0.32,0.45)		295.49(248.29,350.00)	0.10(0.09,0.12)		17865.26(15028.74,21116.97)	6.33(5.33,7.48)
Oceania	3.41(1.92,5.59)	0.07(0.04,0.11)		1.25(0.66,2.10)	0.02(0.01,0.04)		69.09(36.40,116.61)	1.36(0.72,2.30)
Central Asia	228.44(193.44,265.50)	0.58(0.49,0.67)		71.61(60.33,83.44)	0.18(0.15,0.21)		4269.76(3602.37,4970.42)	10.93(9.22,12.72)
Central Europe	313.84(278.89,351.85)	0.75(0.67,0.84)		62.59(56.58,68.84)	0.15(0.14,0.17)		3682.28(3323.02,4066.14)	8.99(8.11,9.94)
Eastern Europe	795.85(709.97,891.34)	0.96(0.86,1.07)		145.03(127.89,164.91)	0.17(0.15,0.20)		8540.04(7549.32,9706.71)	10.52(9.32,11.93)
High-income Asia Pacific	367.80(321.75,422.51)	0.65(0.57,0.75)		47.99(43.45,53.91)	0.09(0.08,0.10)		2962.24(2672.50,3323.58)	5.36(4.84,6.00)
Australasia	129.84(98.35,167.09)	1.12(0.85,1.45)		15.67(12.21,19.91)	0.14(0.11,0.17)		963.37(753.42,1216.51)	8.44(6.61,10.65)
Western Europe	1695.84(1497.46,1943.64)	1.18(1.04,1.35)		193.07(175.50,213.38)	0.13(0.12,0.15)		11886.57(10745.31,13160.92)	8.38(7.59,9.27)
Southern Latin America	1014.48(809.33,1257.15)	3.83(3.06,4.75)		101.66(84.87,120.72)	0.38(0.32,0.46)		6568.13(5449.12,7814.31)	24.93(20.69,29.66)
High-income North America	2116.14(2009.38,2230.28)	1.63(1.54,1.71)		210.46(200.67,220.29)	0.16(0.15,0.17)		13272.97(12557.74,14032.00)	10.28(9.73,10.87)
Caribbean	120.85(100.53,144.52)	0.66(0.55,0.79)		37.89(30.75,47.82)	0.21(0.17,0.26)		2334.64(1893.13,2958.22)	12.74(10.33,16.16)
Andean Latin America	192.81(143.48,259.94)	0.71(0.53,0.96)		55.84(42.23,73.66)	0.21(0.16,0.27)		3443.32(2609.72,4537.10)	12.70(9.62,16.74)
Central Latin America	652.07(583.28,732.63)	0.65(0.58,0.73)		188.19(168.88,209.32)	0.19(0.17,0.21)		11373.55(10217.14,12668.43)	11.26(10.12,12.55)
Tropical Latin America	578.05(530.39,635.11)	0.62(0.57,0.68)		169.08(156.37,183.28)	0.18(0.17,0.20)		10181.62(9417.61,11063.31)	11.04(10.21,11.99)
North Africa and Middle East	1563.62(1306.18,1869.44)	0.59(0.49,0.71)		224.12(190.10,261.59)	0.08(0.07,0.10)		13857.10(11752.40,16266.54)	5.27(4.47,6.19)
South Asia	821.39(680.10,984.81)	0.11(0.09,0.13)		305.47(251.45,366.69)	0.04(0.03,0.05)		18019.03(14793.15,21737.81)	2.34(1.92,2.82)
Central Sub-Saharan Africa	53.66(25.27,90.81)	0.11(0.05,0.19)		25.74(11.82,43.84)	0.05(0.02,0.09)		1551.50(712.27,2642.14)	3.20(1.47,5.43)
Eastern Sub-Saharan Africa	241.12(159.45,330.61)	0.16(0.11,0.22)		108.33(70.79,148.27)	0.07(0.05,0.10)		6518.59(4266.25,8943.26)	4.25(2.78,5.81)
Southern Sub-Saharan Africa	116.03(92.74,147.50)	0.33(0.27,0.42)		43.64(34.98,55.06)	0.13(0.10,0.16)		2577.07(2066.92,3253.44)	7.43(5.96,9.38)
Western Sub-Saharan Africa	117.21(77.32,158.24)	0.07(0.05,0.10)		50.92(33.84,67.07)	0.03(0.02,0.04)		3036.15(2017.16,4015.20)	1.84(1.22,2.42)
