# Supplementary material for: Global, regional, and national burden of early-onset kidney cancer in adolescents and young adults aged 15-39 years from 1990 to 2021: a systematic analysis for the Global Burden of Disease Study 2021
Source: Research Square preprint supplement (doi:10.21203/rs.3.rs-7464519/v1), 2025-10-17
Supplement: Supplementary file 6 [file e7151ba88c1cc332b3df20be.xlsx]

## Sheet: Sheet1
Supplementary Table 4. Temporal trends in age-standardized incidence rates of early-onset kidney cancer, 1990–2021.
	Incidence Rate per 100000 (95% UI)
	1990	2021		1990-2021
Regions	Rate per 100,000(95% UI)	Rate per 100,000(95% UI)		Change Percentage(%)	EAPC	AAPC
Global	0.44(0.42,0.46)	0.58(0.54,0.62)		31.56(20.99,42.32)	1.10(0.99,1.21)	0.004(0.004,0.004)
East Asia	0.38(0.32,0.43)	0.97(0.79,1.19)		219.52(148.42,314.12)	3.88(3.57,4.20)	0.019(0.018,0.020)
Southeast Asia	0.24(0.20,0.28)	0.38(0.32,0.45)		82.06(49.29,119.83)	1.26(1.10,1.43)	0.005(0.005,0.005)
Oceania	0.06(0.04,0.10)	0.07(0.04,0.11)		16.87(-16.29,69.19)	0.09(-0.03,0.20)	0.000(0.000,0.000)
Central Asia	0.40(0.34,0.47)	0.58(0.49,0.67)		47.79(14.02,82.49)	1.11(0.89,1.34)	0.006(0.005,0.007)
Central Europe	0.53(0.49,0.57)	0.75(0.67,0.84)		42.79(26.71,60.79)	1.29(1.04,1.54)	0.007(0.006,0.008)
Eastern Europe	0.85(0.78,0.93)	0.96(0.86,1.07)		13.90(-0.38,29.04)	0.54(0.02,1.05)	0.003(-0.000,0.006)
High-income Asia Pacific	0.39(0.35,0.43)	0.65(0.57,0.75)		86.36(62.70,117.59)	1.81(1.42,2.21)	0.009(0.008,0.010)
Australasia	0.68(0.57,0.82)	1.12(0.85,1.45)		80.65(38.85,125.21)	1.73(1.41,2.06)	0.014(0.013,0.016)
Western Europe	0.87(0.81,0.95)	1.18(1.04,1.35)		42.63(25.20,63.70)	1.04(0.82,1.25)	0.010(0.008,0.011)
Southern Latin America	3.57(2.91,4.34)	3.83(3.06,4.75)		14.21(-5.57,37.12)	0.57(0.08,1.06)	0.006(-0.003,0.014)
High-income North America	1.50(1.45,1.55)	1.63(1.54,1.71)		12.77(6.31,19.34)	0.52(0.40,0.64)	0.005(0.002,0.007)
Caribbean	0.55(0.47,0.65)	0.66(0.55,0.79)		20.68(3.42,39.93)	0.60(0.48,0.72)	0.003(0.002,0.004)
Andean Latin America	0.49(0.39,0.63)	0.71(0.53,0.96)		53.34(14.57,107.68)	1.26(1.00,1.51)	0.008(0.007,0.010)
Central Latin America	0.36(0.35,0.38)	0.65(0.58,0.73)		96.77(75.01,120.18)	2.10(1.96,2.24)	0.009(0.008,0.010)
Tropical Latin America	0.31(0.28,0.33)	0.62(0.57,0.68)		132.30(111.85,153.35)	2.26(2.12,2.40)	0.010(0.010,0.011)
North Africa and Middle East	0.34(0.26,0.44)	0.59(0.49,0.71)		89.61(44.90,151.99)	2.14(1.98,2.29)	0.008(0.008,0.008)
South Asia	0.05(0.05,0.06)	0.11(0.09,0.13)		93.58(62.50,132.26)	2.24(2.12,2.35)	0.002(0.002,0.002)
Central Sub-Saharan Africa	0.08(0.04,0.12)	0.11(0.05,0.19)		35.83(-10.47,92.17)	1.36(1.13,1.60)	0.001(0.001,0.001)
Eastern Sub-Saharan Africa	0.10(0.08,0.12)	0.16(0.11,0.22)		59.74(17.62,125.19)	1.62(1.47,1.78)	0.002(0.002,0.002)
Southern Sub-Saharan Africa	0.28(0.24,0.32)	0.33(0.27,0.42)		42.80(12.88,80.07)	0.73(0.16,1.30)	0.001(0.001,0.002)
Western Sub-Saharan Africa	0.03(0.03,0.04)	0.07(0.05,0.10)		111.83(63.27,177.16)	2.66(2.56,2.77)	0.001(0.001,0.001)
High-middle SDI	0.72(0.67,0.78)	1.14(1.01,1.29)		70.93(52.10,94.70)	1.80(1.59,2.02)	0.012(0.011,0.013)
High SDI	0.93(0.89,0.96)	1.24(1.16,1.32)		43.71(34.66,53.52)	1.13(1.01,1.25)	0.011(0.010,0.011)
Middle SDI	0.27(0.25,0.29)	0.51(0.46,0.57)		103.00(76.34,129.86)	2.38(2.26,2.50)	0.008(0.008,0.008)
Low-middle SDI	0.10(0.09,0.12)	0.19(0.16,0.22)		85.07(59.12,118.37)	2.09(2.04,2.14)	0.003(0.003,0.003)
Low SDI	0.07(0.06,0.09)	0.12(0.08,0.16)		53.90(23.16,102.92)	1.64(1.57,1.71)	0.001(0.001,0.002)
